# Supplementary material for: Integrated oral microbiome profiling from aligners, saliva, and plaqueidentifies biosynthetic signatures of disease
Source: Research Square preprint supplement (doi:10.21203/rs.3.rs-8040988/v1), 2025-12-23
Supplement: Supplementary file 1 [file a4433a72cb051e39ae2771ab.xlsx]

## Sheet: Legends
Supplementary Table Legends
Supplementary Table1	Cohort characteristics of participants included in the spatial and short-term aligner studies. Abbreviations: n=number of samples, SD=standard deviation, q=adjusted p-value.
Supplementary Table2	Cohort characteristics of participants included in the long-term aligner study. Abbreviations: n=number of samples, SD=standard deviation, q=adjusted p-value.
Supplementary Table3	Differentially abundant species across long-term aligner timepoints. Only significant abundant taxa with an adjusted p-value (q) < 0.05 and absolute log2-fold change (|lfc|) > 1.2 are shown. The comparison column indicates the pairwise comparison where the taxon was found differentially abundant, taking the first timepoint as reference for logFC calculations. Timepoints: 1=1-2 weeks; 2=12-13 week…
Supplementary Table4	Cohort characteristics of participants included in the specimen comparison study, including paired samples from aligners, plaque, and saliva. Abbreviations: n=number of samples, SD=standard deviation, q=adjusted p-value.
Supplementary Table5	Differentially abundant genera/species between specimen types. Only significant abundant taxa with an adjusted p-value (q) < 0.05 and absolute log2-fold change (|lfc|) > 1.2 are shown. The comparison column indicates the pairwise comparison where the taxon was found differentially abundant, taking the first specimen as reference for logFC calculations. Abbreviations: lfc=log-fold change, W=test s…
Supplementary Table6	Cohort characteristics of participants included in the cross-specimen cross-disease study. Abbreviations: n=number of samples, SD=standard deviation, q=adjusted p-value.
Supplementary Table7	Detailed sample inclusion in each study comparison.
Supplementary Table8	Detailed information on the species-level genome bins, their taxonomic assignment, quality, and novelty.
Supplementary Table9	Virulence factors detected in the oral metagenomes.
Supplementary Table10	Differentially abundant antimicrobial resistance genes (ARGs) across diseases and specimen type. Only significant abundant ARGs with an adjusted p-value (q) < 0.05 and absolute log2-fold change (|lfc|) > 1.2 are shown. Non-affected individuals (controls) were used as the reference group for logFC calculations. Abbreviations: lfc=log-fold change, W=test statistics, q=adjusted p-value, p=p-value, p…

## Sheet: SupplementaryTable1
**Characteristic**	**N**	**Overall** N = 6	**male** N = 3	**female** N = 3	**q-value**
__age, Mean +/- SD__	6	38 +/- 12	45 +/- 11	31 +/- 9	38
__oral_status, n (%)__	6
control		6 (100%)	3 (100%)	3 (100%)

## Sheet: SupplementaryTable2
**Characteristic**	**N**	**Overall** N = 480	**Timepoint 1** N = 218	**Timepoint 2** N = 165	**Timepoint 3** N = 97	**q-value**
__age, Mean +/- SD__	331	34 +/- 10	33 +/- 10	36 +/- 11	35 +/- 10	32
__specimen, n (%)__	480
Aligner		480 (100%)	218 (100%)	165 (100%)	97 (100%)
__gender, n (%)__	442					84
male		95 (21%)	42 (20%)	34 (22%)	19 (23%)
female		347 (79%)	165 (80%)	118 (78%)	64 (77%)
__oral_status, n (%)__	234					8
control		47 (20%)	25 (15%)	20 (29%)	2 (100%)
disease		187 (80%)	139 (85%)	48 (71%)	0 (0%)
__Periodontitis, n (%)__	234					58
FALSE		143 (61%)	97 (59%)	44 (65%)	2 (100%)
TRUE		91 (39%)	67 (41%)	24 (35%)	0 (0%)
__Caries, n (%)__	234					58
FALSE		146 (62%)	98 (60%)	46 (68%)	2 (100%)
TRUE		88 (38%)	66 (40%)	22 (32%)	0 (0%)

## Sheet: SupplementaryTable3
taxon	lfc	se	W	p	q	passed_ss	comparison	level	N_timepoint_reference	N_timepoint_group	structural_zero (timepoint = 1)	structural_zero (timepoint = 3)	structural_zero (timepoint = 2)
Acinetobacter_johnsonii	-1.36716	0.2741	-4.98779	1.05353e-05	0.00011217	TRUE	1_vs_3	Species	28	17	FALSE	FALSE
Brevibacterium_casei	2.04046	0.138098	14.7754	7.5939e-16	9.29433e-14	TRUE	1_vs_2	Species	40	60	FALSE		FALSE
Mesorhizobium_hungaricum	1.40515	0.204117	6.88405	5.57116e-10	1.09752e-08	TRUE	1_vs_2	Species	40	60	FALSE		FALSE

## Sheet: SupplementaryTable4
**Characteristic**	**N**	**Overall** N = 34	**control** N = 24	**disease** N = 10	**q-value**
__age, Mean +/- SD__	34	28 +/- 9	25 +/- 5	34 +/- 13	16
__gender, n (%)__	34				70
male		13 (38%)	10 (42%)	3 (30%)
female		21 (62%)	14 (58%)	7 (70%)

## Sheet: SupplementaryTable5
taxon	lfc	se	W	p	q	passed_ss	comparison	level	N_reference	N_specimen	structural_zero (specimen = Aligner)	structural_zero (specimen = Saliva)	structural_zero (specimen = Plaque)
Actinobaculum	1.49047	0.480583	3.10138	0.00261372	0.00433019	TRUE	Aligner_vs_Plaque	Genus	15	13	FALSE	FALSE	FALSE
Actinobaculum	2.08754	0.53892	3.87355	0.000210168	0.000696379	TRUE	Saliva_vs_Plaque	Genus	13	21	FALSE	FALSE	FALSE
Actinobaculum_sp_oral_taxon_183	1.49047	0.485893	3.06749	0.00289534	0.00520621	TRUE	Aligner_vs_Plaque	Species	33	31	FALSE	FALSE	FALSE
Actinobaculum_sp_oral_taxon_183	2.08754	0.553474	3.7717	0.000298905	0.00107495	TRUE	Saliva_vs_Plaque	Species	14	32	FALSE	FALSE	FALSE
Actinomyces_SGB17132	-4.66797	0.479612	-9.73279	1.40779e-14	5.0628e-14	TRUE	Saliva_vs_Plaque	Species	14	32	FALSE	FALSE	FALSE
Actinomyces_SGB17132	-2.49572	0.410485	-6.07992	5.9018e-08	1.06123e-07	TRUE	Aligner_vs_Plaque	Species	33	31	FALSE	FALSE	FALSE
Actinomyces_SGB17132	2.17225	0.449172	4.83612	7.74965e-06	9.28996e-06	TRUE	Aligner_vs_Saliva	Species	11	12	FALSE	FALSE	FALSE
Actinomyces_dentalis	1.79897	0.621552	2.89432	0.00473405	0.0170249	TRUE	Saliva_vs_Plaque	Species	14	32	FALSE	FALSE	FALSE
Actinomyces_gerencseriae	1.93814	0.47991	4.03854	0.000114633	0.000206126	TRUE	Aligner_vs_Plaque	Species	33	31	FALSE	FALSE	FALSE
Actinomyces_gerencseriae	2.80058	0.593339	4.72004	8.83089e-06	3.17583e-05	TRUE	Saliva_vs_Plaque	Species	14	32	FALSE	FALSE	FALSE
Actinomyces_graevenitzii	-6.04826	0.528273	-11.4491	2.0089e-17	7.22455e-17	TRUE	Saliva_vs_Plaque	Species	14	32	FALSE	FALSE	FALSE
Actinomyces_graevenitzii	-3.77005	0.470992	-8.00449	2.36206e-11	4.2473e-11	TRUE	Aligner_vs_Plaque	Species	33	31	FALSE	FALSE	FALSE
Actinomyces_graevenitzii	2.27821	0.481847	4.72809	1.20785e-05	1.44792e-05	TRUE	Aligner_vs_Saliva	Species	11	12	FALSE	FALSE	FALSE
Actinomyces_johnsonii	1.63805	0.523515	3.12894	0.00278443	0.00500679	TRUE	Saliva_vs_Plaque	Species	14	32	FALSE	FALSE	FALSE
Actinomyces_massiliensis	1.56643	0.445326	3.51748	0.000688254	0.00123757	TRUE	Aligner_vs_Plaque	Species	33	31	FALSE	FALSE	FALSE
Actinomyces_massiliensis	2.05893	0.555407	3.70707	0.000363975	0.00123757	TRUE	Saliva_vs_Plaque	Species	14	32	FALSE	FALSE	FALSE
Actinomyces_naeslundii	1.5866	0.51952	3.05396	0.00294563	0.00689044	TRUE	Aligner_vs_Plaque	Species	33	31	FALSE	FALSE	FALSE
Actinomyces_naeslundii	1.77405	0.598094	2.96617	0.00383199	0.00689044	TRUE	Saliva_vs_Plaque	Species	14	32	FALSE	FALSE	FALSE
Actinomyces_sp_ICM47	-5.04831	0.544598	-9.26978	4.57546e-14	1.64546e-13	TRUE	Saliva_vs_Plaque	Species	14	32	FALSE	FALSE	FALSE
Actinomyces_sp_ICM47	-3.74385	0.456974	-8.19269	5.12833e-12	9.22145e-12	TRUE	Aligner_vs_Plaque	Species	33	31	FALSE	FALSE	FALSE
Actinomyces_sp_ph3	-3.8392	0.477286	-8.04381	2.2103e-11	3.97443e-11	TRUE	Saliva_vs_Plaque	Species	14	32	FALSE	FALSE	FALSE
Actinomyces_sp_ph3	-3.73598	0.398738	-9.36952	9.64072e-14	3.46707e-13	TRUE	Aligner_vs_Plaque	Species	33	31	FALSE	FALSE	FALSE
Aggregatibacter_kilianii	1.44446	0.379797	3.80323	0.00156205	0.00280878	TRUE	Aligner_vs_Plaque	Species	33	31	FALSE	FALSE	FALSE
Alloprevotella	-1.97666	0.491024	-4.02558	0.000181858	0.000602575	TRUE	Saliva_vs_Plaque	Genus	13	21	FALSE	FALSE	FALSE
Arachnia	2.15238	0.489857	4.3939	2.97722e-05	9.37495e-05	TRUE	Aligner_vs_Plaque	Genus	15	13	FALSE	FALSE	FALSE
Arachnia	2.2259	0.527088	4.22302	5.65876e-05	9.37495e-05	TRUE	Saliva_vs_Plaque	Genus	13	21	FALSE	FALSE	FALSE
Arachnia_propionica	1.73858	0.442593	3.92816	0.000180579	0.000649413	TRUE	Aligner_vs_Plaque	Species	33	31	FALSE	FALSE	FALSE
Arachnia_propionica	1.75502	0.506998	3.4616	0.000864627	0.00155472	TRUE	Saliva_vs_Plaque	Species	14	32	FALSE	FALSE	FALSE
Arachnia_rubra	2.31888	0.490226	4.73023	1.33834e-05	4.81303e-05	TRUE	Aligner_vs_Plaque	Species	33	31	FALSE	FALSE	FALSE
Campylobacter	1.80914	0.406593	4.44952	2.50875e-05	4.15628e-05	TRUE	Aligner_vs_Plaque	Genus	15	13	FALSE	FALSE	FALSE
Campylobacter	2.13892	0.419754	5.09564	1.96688e-06	6.51714e-06	TRUE	Aligner_vs_Saliva	Genus	8	8	FALSE	FALSE	FALSE
Campylobacter_SGB96342	1.36384	0.442727	3.08054	0.00368179	0.00662036	TRUE	Aligner_vs_Plaque	Species	33	31	FALSE	FALSE	FALSE
Campylobacter_SGB96342	2.01835	0.502137	4.01951	0.000243631	0.000876164	TRUE	Saliva_vs_Plaque	Species	14	32	FALSE	FALSE	FALSE
Campylobacter_concisus	-4.03683	0.490799	-8.22502	2.91018e-11	1.04658e-10	TRUE	Saliva_vs_Plaque	Species	14	32	FALSE	FALSE	FALSE
Campylobacter_concisus	-2.00404	0.392937	-5.10016	4.038e-06	7.26088e-06	TRUE	Aligner_vs_Plaque	Species	33	31	FALSE	FALSE	FALSE
Campylobacter_concisus	2.03279	0.449443	4.52291	3.13964e-05	3.76367e-05	TRUE	Aligner_vs_Saliva	Species	11	12	FALSE	FALSE	FALSE
Campylobacter_showae	-3.58134	0.432016	-8.28984	4.63287e-08	1.66611e-07	TRUE	Saliva_vs_Plaque	Species	14	32	FALSE	FALSE	FALSE
Campylobacter_showae	2.23374	0.35686	6.25943	3.29794e-06	5.93015e-06	TRUE	Aligner_vs_Saliva	Species	11	12	FALSE	FALSE	FALSE
Candidatus_Absconditabacteria_unclassified	-1.79754	0.505183	-3.5582	0.000828846	0.00137316	TRUE	Saliva_vs_Plaque	Genus	13	21	FALSE	FALSE	FALSE
Candidatus_Absconditabacteria_unclassified	2.87631	0.423862	6.78597	1.29763e-08	4.29962e-08	TRUE	Aligner_vs_Saliva	Genus	8	8	FALSE	FALSE	FALSE
Candidatus_Absconditabacteria_unclassified_SGB6894	-3.79159	0.450547	-8.41553	3.62253e-08	1.04435e-07	TRUE	Saliva_vs_Plaque	Species	14	32	FALSE	FALSE	FALSE
Candidatus_Absconditabacteria_unclassified_SGB6894	3.06276	0.374637	8.17527	5.80797e-08	1.04435e-07	TRUE	Aligner_vs_Saliva	Species	11	12	FALSE	FALSE	FALSE
Candidatus_Nanogingivalis	-2.09402	0.357336	-5.86008	1.50287e-05	4.97965e-05	TRUE	Aligner_vs_Plaque	Genus	15	13	FALSE	FALSE	FALSE
Candidatus_Nanogingivalis	-1.55826	0.409991	-3.80072	0.00130929	0.00216912	TRUE	Saliva_vs_Plaque	Genus	13	21	FALSE	FALSE	FALSE
Candidatus_Nanogingivalis_gingivitcus	-2.09402	0.364447	-5.74575	1.90483e-05	6.8503e-05	TRUE	Aligner_vs_Plaque	Species	33	31	FALSE	FALSE	FALSE
Candidatus_Nanogingivalis_gingivitcus	-1.55826	0.428942	-3.6328	0.0019031	0.00342204	TRUE	Saliva_vs_Plaque	Species	14	32	FALSE	FALSE	FALSE
Candidatus_Nanoperiomorbus	2.99089	0.39827	7.5097	1.02115e-08	3.38352e-08	TRUE	Aligner_vs_Plaque	Genus	15	13	FALSE	FALSE	FALSE
Candidatus_Nanoperiomorbus_periodonticus	2.99089	0.404662	7.39108	1.43644e-08	5.16582e-08	TRUE	Aligner_vs_Plaque	Species	33	31	FALSE	FALSE	FALSE
Candidatus_Nanosynbacter_sp_HMT_352	-4.0949	0.492286	-8.31814	2.65089e-11	9.53333e-11	TRUE	Saliva_vs_Plaque	Species	14	32	FALSE	FALSE	FALSE
Candidatus_Nanosynbacter_sp_HMT_352	-2.58835	0.404927	-6.39213	3.71748e-08	6.68455e-08	TRUE	Aligner_vs_Plaque	Species	33	31	FALSE	FALSE	FALSE
Candidatus_Nanosynsacchari	1.78882	0.51395	3.48054	0.000770377	0.00255259	TRUE	Aligner_vs_Plaque	Genus	15	13	FALSE	FALSE	FALSE
Candidatus_Nanosynsacchari_sp_TM7_ANC_38_39_G1_1	1.78882	0.518919	3.44722	0.000859381	0.00309057	TRUE	Aligner_vs_Plaque	Species	33	31	FALSE	FALSE	FALSE
Candidatus_Saccharibacteria_unclassified	-2.30695	0.520915	-4.42866	2.51233e-05	4.16221e-05	TRUE	Saliva_vs_Plaque	Genus	13	21	FALSE	FALSE	FALSE
Candidatus_Saccharibacteria_unclassified	2.92561	0.454004	6.44402	4.64127e-09	1.53785e-08	TRUE	Aligner_vs_Saliva	Genus	8	8	FALSE	FALSE	FALSE
Capnocytophaga	1.80126	0.465399	3.87037	0.000199296	0.000330178	TRUE	Aligner_vs_Plaque	Genus	15	13	FALSE	FALSE	FALSE
Capnocytophaga	2.56526	0.448126	5.72443	1.2076e-07	4.00131e-07	TRUE	Aligner_vs_Saliva	Genus	8	8	FALSE	FALSE	FALSE
Capnocytophaga_gingivalis	1.28948	0.438307	2.94196	0.00413638	0.00743778	TRUE	Aligner_vs_Plaque	Species	33	31	FALSE	FALSE	FALSE
Capnocytophaga_gingivalis	2.05153	0.412921	4.96834	3.14944e-06	1.13263e-05	TRUE	Aligner_vs_Saliva	Species	11	12	FALSE	FALSE	FALSE
Capnocytophaga_granulosa	-1.2648	0.508661	-2.48652	0.0174103	0.031306	TRUE	Saliva_vs_Plaque	Species	14	32	FALSE	FALSE	FALSE
Capnocytophaga_granulosa	2.02026	0.393227	5.13764	8.63027e-06	3.10368e-05	TRUE	Aligner_vs_Saliva	Species	11	12	FALSE	FALSE	FALSE
Capnocytophaga_leadbetteri	-1.63897	0.563992	-2.90601	0.00473322	0.00620992	TRUE	Saliva_vs_Plaque	Species	14	32	FALSE	FALSE	FALSE
Capnocytophaga_leadbetteri	2.96028	0.45953	6.44197	8.19053e-09	2.94554e-08	TRUE	Aligner_vs_Saliva	Species	11	12	FALSE	FALSE	FALSE
Capnocytophaga_ochracea	1.44551	0.444503	3.25197	0.00197768	0.00355614	TRUE	Saliva_vs_Plaque	Species	14	32	FALSE	FALSE	FALSE
Capnocytophaga_ochracea	1.54998	0.373028	4.15514	0.000116652	0.000419513	TRUE	Aligner_vs_Plaque	Species	33	31	FALSE	FALSE	FALSE
Capnocytophaga_sputigena	1.5004	0.356428	4.20955	8.41091e-05	0.000302479	TRUE	Aligner_vs_Saliva	Species	11	12	FALSE	FALSE	FALSE
Capnocytophaga_sputigena	1.57812	0.399447	3.95077	0.000202046	0.000363306	TRUE	Aligner_vs_Plaque	Species	33	31	FALSE	FALSE	FALSE
Cardiobacterium	1.40297	0.537709	2.60915	0.0106287	0.0176087	TRUE	Saliva_vs_Plaque	Genus	13	21	FALSE	FALSE	FALSE
Cardiobacterium	2.00377	0.501824	3.99297	0.000133005	0.000440704	TRUE	Aligner_vs_Plaque	Genus	15	13	FALSE	FALSE	FALSE
Cardiobacterium_SGB9419	1.70808	0.47167	3.62136	0.000631752	0.00113598	TRUE	Saliva_vs_Plaque	Species	14	32	FALSE	FALSE	FALSE
Cardiobacterium_SGB9419	1.75157	0.423454	4.13638	0.000119515	0.000429807	TRUE	Aligner_vs_Plaque	Species	33	31	FALSE	FALSE	FALSE
Cardiobacterium_sp_Marseille_Q4385	1.85663	0.427261	4.34543	5.78788e-05	0.000208148	TRUE	Aligner_vs_Plaque	Species	33	31	FALSE	FALSE	FALSE
Catonella	-2.02646	0.517366	-3.91688	0.000258359	0.000856056	TRUE	Saliva_vs_Plaque	Genus	13	21	FALSE	FALSE	FALSE
Corynebacterium_matruchotii	1.39595	0.506507	2.75604	0.00824578	0.0296541	TRUE	Aligner_vs_Plaque	Species	33	31	FALSE	FALSE	FALSE
Cutibacterium	-1.4044	0.504479	-2.78387	0.00731199	0.0242278	TRUE	Aligner_vs_Plaque	Genus	15	13	FALSE	FALSE	FALSE
Cutibacterium_acnes	-1.56072	0.514855	-3.03138	0.00368242	0.013243	TRUE	Aligner_vs_Plaque	Species	33	31	FALSE	FALSE	FALSE
Dialister	2.087	0.441943	4.72233	9.64854e-06	3.19698e-05	TRUE	Aligner_vs_Plaque	Genus	15	13	FALSE	FALSE	FALSE
Dialister_invisus	2.02115	0.454514	4.44684	2.74557e-05	9.87381e-05	TRUE	Aligner_vs_Plaque	Species	33	31	FALSE	FALSE	FALSE
Eubacteriales_Family_XIII_Incertae_Sedis_unclassified	-1.74798	0.535958	-3.26141	0.00155039	0.00256856	TRUE	Saliva_vs_Plaque	Genus	13	21	FALSE	FALSE	FALSE
Eubacteriales_Family_XIII_Incertae_Sedis_unclassified	1.53138	0.420408	3.64261	0.000443902	0.00147084	TRUE	Aligner_vs_Saliva	Genus	8	8	FALSE	FALSE	FALSE
Eubacterium_sulci	-4.66691	0.490381	-9.51691	1.88184e-13	6.76761e-13	TRUE	Saliva_vs_Plaque	Species	14	32	FALSE	FALSE	FALSE
Eubacterium_sulci	-2.50512	0.418458	-5.98654	1.43439e-07	2.57923e-07	TRUE	Aligner_vs_Plaque	Species	33	31	FALSE	FALSE	FALSE
Eubacterium_sulci	2.16179	0.465837	4.64066	2.02973e-05	2.43315e-05	TRUE	Aligner_vs_Saliva	Species	11	12	FALSE	FALSE	FALSE
Fusobacterium	1.87247	0.381483	4.90841	4.31604e-06	7.15046e-06	TRUE	Aligner_vs_Saliva	Genus	8	8	FALSE	FALSE	FALSE
Fusobacterium	2.16129	0.372933	5.79538	1.09761e-07	3.63685e-07	TRUE	Aligner_vs_Plaque	Genus	15	13	FALSE	FALSE	FALSE
Fusobacterium_nucleatum	1.31434	0.441383	2.97778	0.00384131	0.0069072	TRUE	Aligner_vs_Saliva	Species	11	12	FALSE	FALSE	FALSE
Fusobacterium_nucleatum	2.72674	0.39898	6.83428	1.47439e-09	5.30229e-09	TRUE	Aligner_vs_Plaque	Species	33	31	FALSE	FALSE	FALSE
Fusobacterium_periodonticum	-3.81188	0.481138	-7.92263	1.48748e-10	5.3494e-10	TRUE	Saliva_vs_Plaque	Species	14	32	FALSE	FALSE	FALSE
Fusobacterium_periodonticum	-1.44801	0.394213	-3.67318	0.000558537	0.00066955	TRUE	Aligner_vs_Plaque	Species	33	31	FALSE	FALSE	FALSE
Fusobacterium_periodonticum	2.36386	0.418618	5.64683	6.56364e-07	1.18023e-06	TRUE	Aligner_vs_Saliva	Species	11	12	FALSE	FALSE	FALSE
GGB1144	-4.47438	0.476219	-9.39563	1.12963e-11	3.74295e-11	TRUE	Saliva_vs_Plaque	Genus	13	21	FALSE	FALSE	FALSE
GGB1144	-2.01939	0.329155	-6.13506	3.0523e-07	5.05679e-07	TRUE	Aligner_vs_Plaque	Genus	15	13	FALSE	FALSE	FALSE
GGB1144	2.455	0.414094	5.92859	5.95573e-07	6.57797e-07	TRUE	Aligner_vs_Saliva	Genus	8	8	FALSE	FALSE	FALSE
GGB12785	-2.8331	0.572201	-4.95122	4.4197e-06	1.46444e-05	TRUE	Saliva_vs_Plaque	Genus	13	21	FALSE	FALSE	FALSE
GGB12785	-2.09813	0.512072	-4.09734	0.000104662	0.000173395	TRUE	Aligner_vs_Plaque	Genus	15	13	FALSE	FALSE	FALSE
GGB12785_SGB19825	-3.06167	0.434757	-7.04226	2.49021e-08	8.95549e-08	TRUE	Aligner_vs_Plaque	Species	33	31	FALSE	FALSE	FALSE
GGB12785_SGB19825	-2.91448	0.469373	-6.20931	3.27092e-07	5.88156e-07	TRUE	Saliva_vs_Plaque	Species	14	32	FALSE	FALSE	FALSE
GGB1843_SGB2524	-2.59163	0.392313	-6.60602	3.06564e-07	1.10249e-06	TRUE	Aligner_vs_Plaque	Species	33	31	FALSE	FALSE	FALSE
GGB1843_SGB2524	-2.01744	0.42038	-4.79908	4.43308e-05	7.97128e-05	TRUE	Saliva_vs_Plaque	Species	14	32	FALSE	FALSE	FALSE
GGB1844	-1.77057	0.435528	-4.06534	0.000555778	0.000920766	TRUE	Saliva_vs_Plaque	Genus	13	21	FALSE	FALSE	FALSE
GGB1844_SGB2532	-1.77057	0.453413	-3.90499	0.00081517	0.00146579	TRUE	Saliva_vs_Plaque	Species	14	32	FALSE	FALSE	FALSE
GGB18703	-2.3471	0.540738	-4.34054	7.09985e-05	0.000235249	TRUE	Saliva_vs_Plaque	Genus	13	21	FALSE	FALSE	FALSE
GGB18703	1.42022	0.387965	3.66068	0.000615614	0.0010199	TRUE	Aligner_vs_Saliva	Genus	8	8	FALSE	FALSE	FALSE
GGB18703_SGB19793	-3.19267	0.504355	-6.3302	2.5216e-07	9.06837e-07	TRUE	Saliva_vs_Plaque	Species	14	32	FALSE	FALSE	FALSE
GGB18703_SGB19793	-1.93966	0.372623	-5.20541	8.00928e-06	1.44018e-05	TRUE	Aligner_vs_Plaque	Species	33	31	FALSE	FALSE	FALSE
GGB18703_SGB19793	1.25301	0.411832	3.04253	0.00436168	0.0052286	TRUE	Aligner_vs_Saliva	Species	11	12	FALSE	FALSE	FALSE
GGB3883	-3.02048	0.481376	-6.27469	1.56869e-08	5.19775e-08	TRUE	Saliva_vs_Plaque	Genus	13	21	FALSE	FALSE	FALSE
GGB3883	-1.46379	0.439275	-3.33228	0.00129386	0.00142904	TRUE	Aligner_vs_Plaque	Genus	15	13	FALSE	FALSE	FALSE
GGB3883	1.5567	0.448819	3.46843	0.000836754	0.00138626	TRUE	Aligner_vs_Saliva	Genus	8	8	FALSE	FALSE	FALSE
GGB3883_SGB5266	-3.49539	0.48957	-7.13971	1.14031e-09	4.10088e-09	TRUE	Saliva_vs_Plaque	Species	14	32	FALSE	FALSE	FALSE
GGB3883_SGB5266	-2.44934	0.427804	-5.72538	3.09324e-07	5.56206e-07	TRUE	Aligner_vs_Plaque	Species	33	31	FALSE	FALSE	FALSE
GGB45697	-1.3329	0.406078	-3.28238	0.00413913	0.00685737	TRUE	Saliva_vs_Plaque	Genus	13	21	FALSE	FALSE	FALSE
GGB45697_SGB2042	-1.3329	0.425203	-3.13474	0.0057267	0.0102974	TRUE	Saliva_vs_Plaque	Species	14	32	FALSE	FALSE	FALSE
GGB4936	-5.55233	0.466071	-11.9131	1.17027e-15	3.87761e-15	TRUE	Saliva_vs_Plaque	Genus	13	21	FALSE	FALSE	FALSE
GGB4936	-2.44808	0.414038	-5.9127	3.91332e-07	4.32217e-07	TRUE	Aligner_vs_Plaque	Genus	15	13	FALSE	FALSE	FALSE
GGB4936	3.10424	0.407949	7.60939	1.12006e-09	1.85561e-09	TRUE	Aligner_vs_Saliva	Genus	8	8	FALSE	FALSE	FALSE
GGB4936_SGB6889	-5.55233	0.482825	-11.4997	3.9822e-15	1.43211e-14	TRUE	Saliva_vs_Plaque	Species	14	32	FALSE	FALSE	FALSE
GGB4936_SGB6889	-2.44808	0.42019	-5.82613	5.27304e-07	6.32109e-07	TRUE	Aligner_vs_Plaque	Species	33	31	FALSE	FALSE	FALSE
GGB4936_SGB6889	3.10424	0.420938	7.37459	2.50631e-09	4.50668e-09	TRUE	Aligner_vs_Saliva	Species	11	12	FALSE	FALSE	FALSE
GGB4937	-1.87334	0.429854	-4.35808	8.90988e-05	0.000147611	TRUE	Saliva_vs_Plaque	Genus	13	21	FALSE	FALSE	FALSE
GGB4937	1.93603	0.334408	5.78944	9.3437e-07	3.09597e-06	TRUE	Aligner_vs_Saliva	Genus	8	8	FALSE	FALSE	FALSE
GGB4937_SGB6891	-1.82365	0.447987	-4.07076	0.000228779	0.000411375	TRUE	Saliva_vs_Plaque	Species	14	32	FALSE	FALSE	FALSE
GGB4937_SGB6891	1.91465	0.35305	5.42317	3.51758e-06	1.26502e-05	TRUE	Aligner_vs_Saliva	Species	11	12	FALSE	FALSE	FALSE
GGB97311	1.83993	0.432595	4.25324	0.000118963	0.000394177	TRUE	Aligner_vs_Plaque	Genus	15	13	FALSE	FALSE	FALSE
GGB97311_SGB5873	1.83993	0.438487	4.19609	0.000141921	0.000510388	TRUE	Aligner_vs_Plaque	Species	33	31	FALSE	FALSE	FALSE
Gemella	-2.05653	0.459912	-4.47158	2.09052e-05	6.92681e-05	TRUE	Saliva_vs_Plaque	Genus	13	21	FALSE	FALSE	FALSE
Gemella	-1.57369	0.392772	-4.00661	0.000120078	0.000198935	TRUE	Aligner_vs_Plaque	Genus	15	13	FALSE	FALSE	FALSE
Gemella_SGB7284	-2.86203	0.444092	-6.44468	7.89678e-07	2.8399e-06	TRUE	Saliva_vs_Plaque	Species	14	32	FALSE	FALSE	FALSE
Gemella_SGB7291	-1.33562	0.420762	-3.17429	0.00525089	0.00944182	TRUE	Saliva_vs_Plaque	Species	14	32	FALSE	FALSE	FALSE
Gemella_SGB7293	-1.21474	0.471745	-2.575	0.0136367	0.0245206	TRUE	Saliva_vs_Plaque	Species	14	32	FALSE	FALSE	FALSE
Gemella_haemolysans	-2.77794	0.509894	-5.44807	4.48216e-07	1.61191e-06	TRUE	Aligner_vs_Plaque	Species	33	31	FALSE	FALSE	FALSE
Gemella_haemolysans	-2.73223	0.615071	-4.44215	2.55304e-05	4.59072e-05	TRUE	Saliva_vs_Plaque	Species	14	32	FALSE	FALSE	FALSE
Gemella_sanguinis	-4.61472	0.511897	-9.01493	2.93929e-14	8.27344e-14	TRUE	Saliva_vs_Plaque	Species	14	32	FALSE	FALSE	FALSE
Gemella_sanguinis	-4.02142	0.450736	-8.92191	4.60112e-14	8.27344e-14	TRUE	Aligner_vs_Plaque	Species	33	31	FALSE	FALSE	FALSE
Granulicatella	-2.51408	0.455062	-5.5247	2.71983e-07	9.01197e-07	TRUE	Saliva_vs_Plaque	Genus	13	21	FALSE	FALSE	FALSE
Granulicatella	-1.52323	0.394512	-3.86105	0.000202547	0.000335562	TRUE	Aligner_vs_Plaque	Genus	15	13	FALSE	FALSE	FALSE
Granulicatella_SGB8239	-2.22126	0.469044	-4.73571	2.61352e-05	9.39894e-05	TRUE	Saliva_vs_Plaque	Species	14	32	FALSE	FALSE	FALSE
Granulicatella_SGB8245	-2.39288	0.45042	-5.31255	2.48006e-05	8.91897e-05	TRUE	Saliva_vs_Plaque	Species	14	32	FALSE	FALSE	FALSE
Granulicatella_SGB8255	-5.35512	0.528547	-10.1318	7.75256e-17	2.78803e-16	TRUE	Saliva_vs_Plaque	Species	14	32	FALSE	FALSE	FALSE
Granulicatella_SGB8255	-4.2263	0.487176	-8.67509	1.03902e-13	1.86829e-13	TRUE	Aligner_vs_Plaque	Species	33	31	FALSE	FALSE	FALSE
Haemophilus	-2.02744	0.530174	-3.8241	0.000234618	0.000777391	TRUE	Aligner_vs_Plaque	Genus	15	13	FALSE	FALSE	FALSE
Haemophilus	-1.47726	0.636846	-2.31966	0.0225014	0.0372784	TRUE	Saliva_vs_Plaque	Genus	13	21	FALSE	FALSE	FALSE
Haemophilus_haemolyticus	-3.05697	0.513904	-5.94853	7.75114e-08	2.78752e-07	TRUE	Aligner_vs_Plaque	Species	33	31	FALSE	FALSE	FALSE
Haemophilus_parahaemolyticus	-2.92529	0.381915	-7.65954	2.41375e-08	8.6805e-08	TRUE	Aligner_vs_Plaque	Species	33	31	FALSE	FALSE	FALSE
Haemophilus_parahaemolyticus	-2.27808	0.473184	-4.81437	4.60712e-05	8.28423e-05	TRUE	Saliva_vs_Plaque	Species	14	32	FALSE	FALSE	FALSE
Haemophilus_sputorum	-3.28265	0.532325	-6.16663	6.82953e-08	1.22804e-07	TRUE	Saliva_vs_Plaque	Species	14	32	FALSE	FALSE	FALSE
Haemophilus_sputorum	-3.11536	0.461201	-6.7549	7.02334e-09	2.52579e-08	TRUE	Aligner_vs_Plaque	Species	33	31	FALSE	FALSE	FALSE
Kingella	1.79309	0.428403	4.18553	7.56942e-05	0.000250808	TRUE	Aligner_vs_Plaque	Genus	15	13	FALSE	FALSE	FALSE
Kingella_bonacorsii	1.41479	0.525057	2.69454	0.00869433	0.0156336	TRUE	Saliva_vs_Plaque	Species	14	32	FALSE	FALSE	FALSE
Kingella_bonacorsii	1.95742	0.449349	4.35613	4.14026e-05	0.000148895	TRUE	Aligner_vs_Plaque	Species	33	31	FALSE	FALSE	FALSE
Lachnoanaerobaculum	-2.19373	0.483636	-4.53591	1.80391e-05	2.98856e-05	TRUE	Saliva_vs_Plaque	Genus	13	21	FALSE	FALSE	FALSE
Lachnoanaerobaculum	1.98665	0.389403	5.10178	1.91831e-06	6.3562e-06	TRUE	Aligner_vs_Saliva	Genus	8	8	FALSE	FALSE	FALSE
Lachnoanaerobaculum_orale	-3.58958	0.540413	-6.6423	2.60133e-08	9.3551e-08	TRUE	Saliva_vs_Plaque	Species	14	32	FALSE	FALSE	FALSE
Lachnoanaerobaculum_orale	2.01965	0.460196	4.38868	6.232e-05	0.00011206	TRUE	Aligner_vs_Saliva	Species	11	12	FALSE	FALSE	FALSE
Lachnoanaerobaculum_saburreum	1.62265	0.402593	4.0305	0.000235628	0.000847382	TRUE	Aligner_vs_Plaque	Species	33	31	FALSE	FALSE	FALSE
Lachnoanaerobaculum_sp_ICM7	-3.79944	0.475188	-7.99567	2.97084e-11	1.06839e-10	TRUE	Saliva_vs_Plaque	Species	14	32	FALSE	FALSE	FALSE
Lachnoanaerobaculum_sp_ICM7	-2.32988	0.397452	-5.86204	1.66979e-07	3.00251e-07	TRUE	Aligner_vs_Plaque	Species	33	31	FALSE	FALSE	FALSE
Lachnospiraceae_bacterium_oral_taxon_096	-4.44914	0.456529	-9.74559	5.37993e-10	1.93477e-09	TRUE	Saliva_vs_Plaque	Species	14	32	FALSE	FALSE	FALSE
Lachnospiraceae_bacterium_oral_taxon_096	-2.18811	0.357463	-6.12122	2.12744e-06	3.82542e-06	TRUE	Aligner_vs_Plaque	Species	33	31	FALSE	FALSE	FALSE
Lachnospiraceae_bacterium_oral_taxon_096	2.26103	0.407773	5.54482	9.16724e-06	1.09893e-05	TRUE	Aligner_vs_Saliva	Species	11	12	FALSE	FALSE	FALSE
Lachnospiraceae_unclassified	-4.35974	0.438672	-9.93849	1.62053e-10	5.36952e-10	TRUE	Saliva_vs_Plaque	Genus	13	21	FALSE	FALSE	FALSE
Lachnospiraceae_unclassified	2.26103	0.39338	5.7477	4.12356e-06	4.55438e-06	TRUE	Aligner_vs_Saliva	Genus	8	8	FALSE	FALSE	FALSE
Lancefieldella	-2.4702	0.529088	-4.66879	1.01662e-05	1.68426e-05	TRUE	Saliva_vs_Plaque	Genus	13	21	FALSE	FALSE	FALSE
Lancefieldella	2.53452	0.4508	5.62227	1.96383e-07	6.50702e-07	TRUE	Aligner_vs_Saliva	Genus	8	8	FALSE	FALSE	FALSE
Lancefieldella_parvula	-3.52148	0.543986	-6.47348	5.0924e-09	1.83136e-08	TRUE	Saliva_vs_Plaque	Species	14	32	FALSE	FALSE	FALSE
Lancefieldella_parvula	2.85605	0.487295	5.86103	7.6544e-08	1.37637e-07	TRUE	Aligner_vs_Saliva	Species	11	12	FALSE	FALSE	FALSE
Lautropia_dentalis	1.5074	0.44009	3.42522	0.00140794	0.00506332	TRUE	Aligner_vs_Plaque	Species	33	31	FALSE	FALSE	FALSE
Leptotrichia	2.31335	0.400899	5.7704	1.10638e-07	3.66591e-07	TRUE	Aligner_vs_Saliva	Genus	8	8	FALSE	FALSE	FALSE
Leptotrichia_sp_oral_taxon_215	-3.05466	0.50296	-6.07337	5.15168e-08	1.85269e-07	TRUE	Saliva_vs_Plaque	Species	14	32	FALSE	FALSE	FALSE
Leptotrichia_sp_oral_taxon_215	-1.5732	0.403187	-3.90192	0.000210436	0.000378393	TRUE	Aligner_vs_Plaque	Species	33	31	FALSE	FALSE	FALSE
Leptotrichia_sp_oral_taxon_215	1.48146	0.438506	3.37842	0.00117247	0.0014055	TRUE	Aligner_vs_Saliva	Species	11	12	FALSE	FALSE	FALSE
Leptotrichia_wadei	-3.21259	0.490612	-6.54813	2.40424e-08	4.32315e-08	TRUE	Saliva_vs_Plaque	Species	14	32	FALSE	FALSE	FALSE
Leptotrichia_wadei	2.71461	0.394048	6.88903	6.80447e-09	2.44707e-08	TRUE	Aligner_vs_Saliva	Species	11	12	FALSE	FALSE	FALSE
Megasphaera	-4.04453	0.478881	-8.44579	2.93969e-11	4.87023e-11	TRUE	Saliva_vs_Plaque	Genus	13	21	FALSE	FALSE	FALSE
Megasphaera	3.49389	0.393647	8.87568	6.39294e-12	2.11826e-11	TRUE	Aligner_vs_Saliva	Genus	8	8	FALSE	FALSE	FALSE
Megasphaera_micronuciformis	-4.04453	0.495203	-8.16742	7.95939e-11	1.43121e-10	TRUE	Saliva_vs_Plaque	Species	14	32	FALSE	FALSE	FALSE
Megasphaera_micronuciformis	3.49389	0.407093	8.58253	1.80624e-11	6.49573e-11	TRUE	Aligner_vs_Saliva	Species	11	12	FALSE	FALSE	FALSE
Mogibacterium	-2.61851	0.493014	-5.31123	8.25919e-07	1.36831e-06	TRUE	Saliva_vs_Plaque	Genus	13	21	FALSE	FALSE	FALSE
Mogibacterium	1.96895	0.364364	5.40381	5.62038e-07	1.36831e-06	TRUE	Aligner_vs_Saliva	Genus	8	8	FALSE	FALSE	FALSE
Mogibacterium_diversum	-4.32208	0.519969	-8.31219	4.00597e-12	1.44066e-11	TRUE	Saliva_vs_Plaque	Species	14	32	FALSE	FALSE	FALSE
Mogibacterium_diversum	2.32304	0.388215	5.98389	7.73892e-08	1.39156e-07	TRUE	Aligner_vs_Saliva	Species	11	12	FALSE	FALSE	FALSE
Neisseria	-1.81614	0.567731	-3.19894	0.00185325	0.00450959	TRUE	Saliva_vs_Plaque	Genus	13	21	FALSE	FALSE	FALSE
Neisseria	-1.49031	0.484675	-3.07487	0.00272201	0.00450959	TRUE	Aligner_vs_Plaque	Genus	15	13	FALSE	FALSE	FALSE
Neisseria_cinerea	-2.15822	0.465691	-4.63445	3.60447e-05	6.48133e-05	TRUE	Saliva_vs_Plaque	Species	14	32	FALSE	FALSE	FALSE
Neisseria_subflava	-5.12736	0.607769	-8.43635	3.59449e-13	6.46338e-13	TRUE	Saliva_vs_Plaque	Species	14	32	FALSE	FALSE	FALSE
Neisseria_subflava	-4.86572	0.508921	-9.56084	1.43469e-15	5.15953e-15	TRUE	Aligner_vs_Plaque	Species	33	31	FALSE	FALSE	FALSE
Olsenella_sp_oral_taxon_807	1.48858	0.565602	2.63185	0.0101867	0.0183171	TRUE	Saliva_vs_Plaque	Species	14	32	FALSE	FALSE	FALSE
Oribacterium	-2.25926	0.556346	-4.06089	0.000101186	0.000335273	TRUE	Saliva_vs_Plaque	Genus	13	21	FALSE	FALSE	FALSE
Oribacterium	1.30321	0.380322	3.4266	0.000908159	0.00150456	TRUE	Aligner_vs_Saliva	Genus	8	8	FALSE	FALSE	FALSE
Oribacterium_SGB5283	-4.15538	0.421182	-9.866	3.9675e-09	7.1341e-09	TRUE	Saliva_vs_Plaque	Species	14	32	FALSE	FALSE	FALSE
Oribacterium_SGB5283	-4.13023	0.371986	-11.1032	5.29549e-10	1.9044e-09	TRUE	Aligner_vs_Plaque	Species	33	31	FALSE	FALSE	FALSE
Oribacterium_parvum	-3.84302	0.469774	-8.18058	6.60596e-11	2.37568e-10	TRUE	Saliva_vs_Plaque	Species	14	32	FALSE	FALSE	FALSE
Oribacterium_parvum	-1.6376	0.392315	-4.17419	0.000114148	0.000136836	TRUE	Aligner_vs_Plaque	Species	33	31	FALSE	FALSE	FALSE
Oribacterium_parvum	2.20542	0.43468	5.07367	5.31963e-06	9.56543e-06	TRUE	Aligner_vs_Saliva	Species	11	12	FALSE	FALSE	FALSE
Oribacterium_sinus	-4.84472	0.480126	-10.0905	1.49484e-15	5.37586e-15	TRUE	Saliva_vs_Plaque	Species	14	32	FALSE	FALSE	FALSE
Oribacterium_sinus	-3.52377	0.419448	-8.40096	2.25821e-12	4.06056e-12	TRUE	Aligner_vs_Plaque	Species	33	31	FALSE	FALSE	FALSE
Oribacterium_sp_oral_taxon_078	1.29694	0.546438	2.37345	0.0207357	0.0372857	TRUE	Saliva_vs_Plaque	Species	14	32	FALSE	FALSE	FALSE
Oribacterium_sp_oral_taxon_078	1.33966	0.509906	2.62726	0.0108331	0.0372857	TRUE	Aligner_vs_Plaque	Species	33	31	FALSE	FALSE	FALSE
Parvimonas	1.37666	0.462779	2.97477	0.00397288	0.0131639	TRUE	Aligner_vs_Saliva	Genus	8	8	FALSE	FALSE	FALSE
Parvimonas_micra	1.5042	0.462255	3.25406	0.00177388	0.00637936	TRUE	Aligner_vs_Saliva	Species	11	12	FALSE	FALSE	FALSE
Pauljensenia	1.45942	0.480736	3.0358	0.00348564	0.0115494	TRUE	Aligner_vs_Plaque	Genus	15	13	FALSE	FALSE	FALSE
Pauljensenia_hongkongensis	1.45942	0.486045	3.00264	0.00383466	0.0137905	TRUE	Aligner_vs_Plaque	Species	33	31	FALSE	FALSE	FALSE
Peptostreptococcus	-2.76122	0.533993	-5.17088	1.58483e-06	5.25121e-06	TRUE	Saliva_vs_Plaque	Genus	13	21	FALSE	FALSE	FALSE
Peptostreptococcus	1.8708	0.383025	4.88429	4.97684e-06	8.24522e-06	TRUE	Aligner_vs_Saliva	Genus	8	8	FALSE	FALSE	FALSE
Peptostreptococcus_SGB749	-5.37258	0.459978	-11.6801	4.23193e-18	1.52192e-17	TRUE	Saliva_vs_Plaque	Species	14	32	FALSE	FALSE	FALSE
Peptostreptococcus_SGB749	-3.12538	0.395432	-7.90372	2.74787e-11	4.94104e-11	TRUE	Aligner_vs_Plaque	Species	33	31	FALSE	FALSE	FALSE
Peptostreptococcus_SGB749	2.2472	0.37854	5.93649	1.01381e-07	1.21531e-07	TRUE	Aligner_vs_Saliva	Species	11	12	FALSE	FALSE	FALSE
Porphyromonas	-2.61802	0.525553	-4.98146	2.71338e-06	8.99059e-06	TRUE	Saliva_vs_Plaque	Genus	13	21	FALSE	FALSE	FALSE
Porphyromonas	1.92855	0.458741	4.20401	5.79825e-05	9.60606e-05	TRUE	Aligner_vs_Saliva	Genus	8	8	FALSE	FALSE	FALSE
Porphyromonas_bobii	-3.79879	0.550545	-6.90005	5.99628e-10	2.15642e-09	TRUE	Saliva_vs_Plaque	Species	14	32	FALSE	FALSE	FALSE
Porphyromonas_bobii	-1.9257	0.484459	-3.97495	0.000138085	0.00016553	TRUE	Aligner_vs_Plaque	Species	33	31	FALSE	FALSE	FALSE
Porphyromonas_endodontalis	2.22045	0.396231	5.60393	1.13126e-06	2.03416e-06	TRUE	Aligner_vs_Saliva	Species	11	12	FALSE	FALSE	FALSE
Porphyromonas_endodontalis	2.6562	0.398312	6.66863	2.86581e-08	1.03062e-07	TRUE	Aligner_vs_Plaque	Species	33	31	FALSE	FALSE	FALSE
Prevotella	-2.40698	0.540854	-4.45032	2.3773e-05	3.93851e-05	TRUE	Saliva_vs_Plaque	Genus	13	21	FALSE	FALSE	FALSE
Prevotella	2.57988	0.415253	6.21278	1.45121e-08	4.80847e-08	TRUE	Aligner_vs_Saliva	Genus	8	8	FALSE	FALSE	FALSE
Prevotella_histicola	-3.33816	0.48747	-6.84792	8.14211e-08	2.92812e-07	TRUE	Saliva_vs_Plaque	Species	14	32	FALSE	FALSE	FALSE
Prevotella_histicola	1.98204	0.409452	4.8407	2.94742e-05	5.29987e-05	TRUE	Aligner_vs_Saliva	Species	11	12	FALSE	FALSE	FALSE
Prevotella_melaninogenica	-4.01949	0.605299	-6.64051	3.77395e-09	1.35722e-08	TRUE	Saliva_vs_Plaque	Species	14	32	FALSE	FALSE	FALSE
Prevotella_melaninogenica	1.9727	0.483329	4.08149	0.000107321	0.000128652	TRUE	Aligner_vs_Saliva	Species	11	12	FALSE	FALSE	FALSE
Prevotella_nanceiensis	-3.62658	0.564061	-6.42942	1.48863e-08	5.35353e-08	TRUE	Saliva_vs_Plaque	Species	14	32	FALSE	FALSE	FALSE
Prevotella_nanceiensis	-1.68844	0.431426	-3.91364	0.000212858	0.00026712	TRUE	Aligner_vs_Plaque	Species	33	31	FALSE	FALSE	FALSE
Prevotella_nanceiensis	1.93814	0.496949	3.90007	0.000222831	0.00026712	TRUE	Aligner_vs_Saliva	Species	11	12	FALSE	FALSE	FALSE
Prevotella_oulorum	1.42858	0.417556	3.4213	0.00153441	0.00551817	TRUE	Aligner_vs_Plaque	Species	33	31	FALSE	FALSE	FALSE
Prevotella_pallens	-4.68612	0.469742	-9.97594	9.28684e-13	3.3398e-12	TRUE	Saliva_vs_Plaque	Species	14	32	FALSE	FALSE	FALSE
Prevotella_pallens	3.12205	0.413688	7.54686	2.09688e-09	3.77048e-09	TRUE	Aligner_vs_Saliva	Species	11	12	FALSE	FALSE	FALSE
Prevotella_salivae	-2.32571	0.54126	-4.29684	0.000125675	0.000225981	TRUE	Saliva_vs_Plaque	Species	14	32	FALSE	FALSE	FALSE
Prevotella_salivae	2.26855	0.471149	4.81494	2.64123e-05	9.49859e-05	TRUE	Aligner_vs_Saliva	Species	11	12	FALSE	FALSE	FALSE
Prevotella_vespertina	-4.42156	0.491547	-8.9952	3.77309e-10	1.35691e-09	TRUE	Saliva_vs_Plaque	Species	14	32	FALSE	FALSE	FALSE
Prevotella_vespertina	3.21332	0.420126	7.64846	1.26269e-08	2.27049e-08	TRUE	Aligner_vs_Saliva	Species	11	12	FALSE	FALSE	FALSE
Pseudoleptotrichia	1.49162	0.448808	3.32352	0.00187868	0.00311244	TRUE	Saliva_vs_Plaque	Genus	13	21	FALSE	FALSE	FALSE
Pseudoleptotrichia	1.79285	0.418312	4.28591	0.000107513	0.000356237	TRUE	Aligner_vs_Plaque	Genus	15	13	FALSE	FALSE	FALSE
Pseudoleptotrichia_goodfellowii	1.49162	0.466183	3.19965	0.0026553	0.00477459	TRUE	Saliva_vs_Plaque	Species	14	32	FALSE	FALSE	FALSE
Pseudoleptotrichia_goodfellowii	1.79285	0.424402	4.22441	0.000130051	0.000467699	TRUE	Aligner_vs_Plaque	Species	33	31	FALSE	FALSE	FALSE
Rothia	-1.73012	0.434253	-3.98413	0.000129504	0.000429101	TRUE	Aligner_vs_Plaque	Genus	15	13	FALSE	FALSE	FALSE
Rothia	-1.71893	0.493519	-3.48302	0.000739733	0.00122553	TRUE	Saliva_vs_Plaque	Genus	13	21	FALSE	FALSE	FALSE
Rothia_mucilaginosa	-4.49734	0.573972	-7.83546	5.39442e-12	9.69991e-12	TRUE	Saliva_vs_Plaque	Species	14	32	FALSE	FALSE	FALSE
Rothia_mucilaginosa	-4.44448	0.52454	-8.4731	2.30197e-13	8.27851e-13	TRUE	Aligner_vs_Plaque	Species	33	31	FALSE	FALSE	FALSE
SR1_bacterium_human_oral_taxon_HOT_345	-1.41765	0.494349	-2.86771	0.00632488	0.007582	TRUE	Saliva_vs_Plaque	Species	14	32	FALSE	FALSE	FALSE
SR1_bacterium_human_oral_taxon_HOT_345	2.84396	0.390944	7.27458	4.53436e-09	1.63068e-08	TRUE	Aligner_vs_Saliva	Species	11	12	FALSE	FALSE	FALSE
Schaalia	-2.25294	0.39896	-5.64702	1.56477e-07	5.18477e-07	TRUE	Saliva_vs_Plaque	Genus	13	21	FALSE	FALSE	FALSE
Schaalia	-1.38592	0.3218	-4.30675	3.90574e-05	6.47071e-05	TRUE	Aligner_vs_Plaque	Genus	15	13	FALSE	FALSE	FALSE
Schaalia_SGB17154	-4.42791	0.47691	-9.28457	1.0858e-08	3.77906e-08	TRUE	Saliva_vs_Plaque	Species	14	32	FALSE	FALSE	FALSE
Schaalia_SGB17154	-3.1723	0.355819	-8.9155	2.10165e-08	3.77906e-08	TRUE	Aligner_vs_Plaque	Species	33	31	FALSE	FALSE	FALSE
Schaalia_SGB17157	-3.43011	0.47894	-7.16187	4.61187e-10	1.65855e-09	TRUE	Aligner_vs_Plaque	Species	33	31	FALSE	FALSE	FALSE
Schaalia_SGB17157	-3.16703	0.579941	-5.46096	5.89567e-07	1.06012e-06	TRUE	Saliva_vs_Plaque	Species	14	32	FALSE	FALSE	FALSE
Schaalia_SGB17158	-3.79968	0.467083	-8.13491	2.30916e-11	4.35543e-11	TRUE	Saliva_vs_Plaque	Species	14	32	FALSE	FALSE	FALSE
Schaalia_SGB17158	-3.28275	0.404133	-8.12294	2.42219e-11	4.35543e-11	TRUE	Aligner_vs_Plaque	Species	33	31	FALSE	FALSE	FALSE
Schaalia_SGB17168	-5.18849	0.493704	-10.5093	1.14415e-14	4.11466e-14	TRUE	Saliva_vs_Plaque	Species	14	32	FALSE	FALSE	FALSE
Schaalia_SGB17168	-2.64686	0.466634	-5.67225	5.68719e-07	1.02263e-06	TRUE	Aligner_vs_Plaque	Species	33	31	FALSE	FALSE	FALSE
Schaalia_SGB17168	2.54162	0.485119	5.23918	2.73207e-06	3.27509e-06	TRUE	Aligner_vs_Saliva	Species	11	12	FALSE	FALSE	FALSE
Schaalia_georgiae	1.29829	0.482343	2.69164	0.00923738	0.0332201	TRUE	Saliva_vs_Plaque	Species	14	32	FALSE	FALSE	FALSE
Schaalia_meyeri	1.23911	0.485177	2.55394	0.0123138	0.0442838	TRUE	Saliva_vs_Plaque	Species	14	32	FALSE	FALSE	FALSE
Schaalia_odontolytica	-3.7754	0.588876	-6.41119	6.30582e-09	2.26775e-08	TRUE	Saliva_vs_Plaque	Species	14	32	FALSE	FALSE	FALSE
Schaalia_odontolytica	-2.34487	0.540205	-4.3407	3.67535e-05	6.60878e-05	TRUE	Aligner_vs_Plaque	Species	33	31	FALSE	FALSE	FALSE
Selenomonas	2.73552	0.445545	6.13971	2.39655e-08	3.9704e-08	TRUE	Aligner_vs_Saliva	Genus	8	8	FALSE	FALSE	FALSE
Selenomonas	2.98888	0.427695	6.98834	5.34038e-10	1.7695e-09	TRUE	Aligner_vs_Plaque	Genus	15	13	FALSE	FALSE	FALSE
Selenomonas_SGB5880	-3.27446	0.474288	-6.90396	1.58101e-08	2.84288e-08	TRUE	Saliva_vs_Plaque	Species	14	32	FALSE	FALSE	FALSE
Selenomonas_SGB5880	2.92651	0.40982	7.14096	7.10773e-09	2.55613e-08	TRUE	Aligner_vs_Saliva	Species	11	12	FALSE	FALSE	FALSE
Selenomonas_SGB5897	1.38458	0.489826	2.82668	0.00674495	0.0121283	TRUE	Saliva_vs_Plaque	Species	14	32	FALSE	FALSE	FALSE
Selenomonas_SGB5897	2.12067	0.428132	4.95331	8.73206e-06	3.14029e-05	TRUE	Aligner_vs_Plaque	Species	33	31	FALSE	FALSE	FALSE
Selenomonas_noxia	2.11698	0.491314	4.30882	4.91611e-05	0.000176797	TRUE	Aligner_vs_Plaque	Species	33	31	FALSE	FALSE	FALSE
Solobacterium	-2.32199	0.551727	-4.2086	6.23183e-05	0.000103244	TRUE	Saliva_vs_Plaque	Genus	13	21	FALSE	FALSE	FALSE
Solobacterium	1.9343	0.422707	4.57598	1.56457e-05	5.18411e-05	TRUE	Aligner_vs_Saliva	Genus	8	8	FALSE	FALSE	FALSE
Solobacterium_SGB6829	-5.03906	0.491084	-10.2611	6.59109e-15	2.37034e-14	TRUE	Saliva_vs_Plaque	Species	14	32	FALSE	FALSE	FALSE
Solobacterium_SGB6829	-2.75841	0.396798	-6.95166	2.80544e-09	5.04456e-09	TRUE	Aligner_vs_Plaque	Species	33	31	FALSE	FALSE	FALSE
Solobacterium_SGB6829	2.28066	0.443905	5.13772	3.08888e-06	3.70282e-06	TRUE	Aligner_vs_Saliva	Species	11	12	FALSE	FALSE	FALSE
Solobacterium_SGB6833	-3.71852	0.427876	-8.69066	1.16121e-07	4.17604e-07	TRUE	Saliva_vs_Plaque	Species	14	32	FALSE	FALSE	FALSE
Solobacterium_SGB6833	-1.88853	0.338138	-5.5851	3.28453e-05	5.90603e-05	TRUE	Aligner_vs_Plaque	Species	33	31	FALSE	FALSE	FALSE
Streptococcus	-1.9476	0.399249	-4.87816	4.09484e-06	1.3568e-05	TRUE	Saliva_vs_Plaque	Genus	13	21	FALSE	FALSE	FALSE
Streptococcus	-1.5121	0.32754	-4.61654	1.17306e-05	1.94344e-05	TRUE	Aligner_vs_Plaque	Genus	15	13	FALSE	FALSE	FALSE
Streptococcus_australis	-4.28599	0.588287	-7.28555	1.07136e-10	1.92644e-10	TRUE	Saliva_vs_Plaque	Species	14	32	FALSE	FALSE	FALSE
Streptococcus_australis	-4.06762	0.51817	-7.84996	7.37858e-12	2.65354e-11	TRUE	Aligner_vs_Plaque	Species	33	31	FALSE	FALSE	FALSE
Streptococcus_infantis	-5.40023	0.482732	-11.1868	2.55654e-18	9.194e-18	TRUE	Saliva_vs_Plaque	Species	14	32	FALSE	FALSE	FALSE
Streptococcus_infantis	-3.86931	0.470339	-8.22665	2.13156e-12	3.83283e-12	TRUE	Aligner_vs_Plaque	Species	33	31	FALSE	FALSE	FALSE
Streptococcus_intermedius	1.26604	0.491247	2.5772	0.0114663	0.041236	TRUE	Saliva_vs_Plaque	Species	14	32	FALSE	FALSE	FALSE
Streptococcus_mitis	-2.38708	0.53864	-4.43167	2.43981e-05	8.77423e-05	TRUE	Saliva_vs_Plaque	Species	14	32	FALSE	FALSE	FALSE
Streptococcus_mitis	-1.97371	0.468122	-4.21622	5.5391e-05	9.96006e-05	TRUE	Aligner_vs_Plaque	Species	33	31	FALSE	FALSE	FALSE
Streptococcus_parasanguinis	-5.67578	0.571724	-9.92749	8.11625e-16	2.91883e-15	TRUE	Saliva_vs_Plaque	Species	14	32	FALSE	FALSE	FALSE
Streptococcus_parasanguinis	-4.58552	0.551264	-8.31819	1.39617e-12	2.51051e-12	TRUE	Aligner_vs_Plaque	Species	33	31	FALSE	FALSE	FALSE
Streptococcus_rubneri	-5.30778	0.458596	-11.574	1.36937e-12	4.92461e-12	TRUE	Saliva_vs_Plaque	Species	14	32	FALSE	FALSE	FALSE
Streptococcus_rubneri	-4.41584	0.401633	-10.9947	4.80597e-12	8.64178e-12	TRUE	Aligner_vs_Plaque	Species	33	31	FALSE	FALSE	FALSE
Streptococcus_salivarius	-5.87946	0.587515	-10.0073	6.36208e-16	2.28798e-15	TRUE	Saliva_vs_Plaque	Species	14	32	FALSE	FALSE	FALSE
Streptococcus_salivarius	-4.61974	0.49918	-9.25465	2.0201e-14	3.63241e-14	TRUE	Aligner_vs_Plaque	Species	33	31	FALSE	FALSE	FALSE
Streptococcus_salivarius	1.25972	0.479217	2.6287	0.0102101	0.0122395	TRUE	Aligner_vs_Saliva	Species	11	12	FALSE	FALSE	FALSE
Streptococcus_sp_F0442	-3.34056	0.362505	-9.21522	5.66386e-10	2.03688e-09	TRUE	Aligner_vs_Plaque	Species	33	31	FALSE	FALSE	FALSE
Streptococcus_sp_F0442	-3.13679	0.446036	-7.03259	1.19501e-07	2.1488e-07	TRUE	Saliva_vs_Plaque	Species	14	32	FALSE	FALSE	FALSE
TM7_phylum_sp_oral_taxon_351	-4.49096	0.447336	-10.0394	1.46717e-11	5.27633e-11	TRUE	Saliva_vs_Plaque	Species	14	32	FALSE	FALSE	FALSE
TM7_phylum_sp_oral_taxon_351	-2.35181	0.370418	-6.34907	3.46601e-07	6.23236e-07	TRUE	Aligner_vs_Plaque	Species	33	31	FALSE	FALSE	FALSE
TM7_phylum_sp_oral_taxon_351	2.13915	0.399805	5.35048	6.55744e-06	7.86078e-06	TRUE	Aligner_vs_Saliva	Species	11	12	FALSE	FALSE	FALSE
TM7_phylum_sp_oral_taxon_352	-5.79265	0.511791	-11.3184	1.21331e-17	4.36338e-17	TRUE	Saliva_vs_Plaque	Species	14	32	FALSE	FALSE	FALSE
TM7_phylum_sp_oral_taxon_352	-2.7838	0.44802	-6.21356	3.00316e-08	3.60007e-08	TRUE	Aligner_vs_Plaque	Species	33	31	FALSE	FALSE	FALSE
TM7_phylum_sp_oral_taxon_352	3.00885	0.446875	6.73309	3.41998e-09	6.14959e-09	TRUE	Aligner_vs_Saliva	Species	11	12	FALSE	FALSE	FALSE
Tannerella	1.80994	0.42648	4.24391	5.57667e-05	0.000184779	TRUE	Aligner_vs_Saliva	Genus	8	8	FALSE	FALSE	FALSE
Tannerella_serpentiformis	1.83257	0.416642	4.39843	3.32789e-05	0.00011968	TRUE	Aligner_vs_Saliva	Species	11	12	FALSE	FALSE	FALSE
Veillonella	-1.39909	0.461461	-3.03186	0.0031025	0.00513996	TRUE	Saliva_vs_Plaque	Genus	13	21	FALSE	FALSE	FALSE
Veillonella_atypica	-3.86576	0.548503	-7.04784	2.07304e-09	7.45523e-09	TRUE	Saliva_vs_Plaque	Species	14	32	FALSE	FALSE	FALSE
Veillonella_atypica	-1.68396	0.422803	-3.98286	0.000186672	0.000223774	TRUE	Aligner_vs_Plaque	Species	33	31	FALSE	FALSE	FALSE
Veillonella_atypica	2.1818	0.489453	4.45763	3.68975e-05	6.63467e-05	TRUE	Aligner_vs_Saliva	Species	11	12	FALSE	FALSE	FALSE
Veillonella_dispar	-5.79476	0.579356	-10.0021	2.18476e-15	7.857e-15	TRUE	Saliva_vs_Plaque	Species	14	32	FALSE	FALSE	FALSE
Veillonella_dispar	-3.6111	0.529835	-6.81551	2.16594e-09	3.89465e-09	TRUE	Aligner_vs_Plaque	Species	33	31	FALSE	FALSE	FALSE
Veillonella_dispar	2.18366	0.483455	4.51677	2.32903e-05	2.79194e-05	TRUE	Aligner_vs_Saliva	Species	11	12	FALSE	FALSE	FALSE
Veillonella_parvula	1.46724	0.445798	3.29127	0.00138722	0.00498881	TRUE	Aligner_vs_Plaque	Species	33	31	FALSE	FALSE	FALSE
Veillonella_parvula	1.49563	0.529461	2.82481	0.00573256	0.0103079	TRUE	Saliva_vs_Plaque	Species	14	32	FALSE	FALSE	FALSE
Veillonella_rogosae	-4.7698	0.553697	-8.61445	1.50363e-13	2.70374e-13	TRUE	Saliva_vs_Plaque	Species	14	32	FALSE	FALSE	FALSE
Veillonella_rogosae	-4.22962	0.479176	-8.82688	5.30527e-14	1.90792e-13	TRUE	Aligner_vs_Plaque	Species	33	31	FALSE	FALSE	FALSE
Veillonella_sp_3627	-1.27277	0.472941	-2.69118	0.0110897	0.0199407	TRUE	Saliva_vs_Plaque	Species	14	32	FALSE	FALSE	FALSE
Veillonella_tobetsuensis	-5.3081	0.448682	-11.8304	3.43468e-12	1.23521e-11	TRUE	Saliva_vs_Plaque	Species	14	32	FALSE	FALSE	FALSE
Veillonella_tobetsuensis	-3.24303	0.379939	-8.53566	3.77631e-09	6.79033e-09	TRUE	Aligner_vs_Plaque	Species	33	31	FALSE	FALSE	FALSE
Veillonella_tobetsuensis	2.06507	0.395744	5.2182	1.69525e-05	2.0322e-05	TRUE	Aligner_vs_Saliva	Species	11	12	FALSE	FALSE	FALSE

## Sheet: SupplementaryTable6
**Characteristic**	**N**	**Overall** N = 582	**Aligner** N = 132	**Plaque** N = 217	**Saliva** N = 233	**q-value**
__age, Mean +/- SD__	582	36 +/- 17	30 +/- 12	38 +/- 18	38 +/- 18	0.008
__gender, n (%)__	582					0.065
male		281 (48%)	52 (39%)	109 (50%)	120 (52%)
female		301 (52%)	80 (61%)	108 (50%)	113 (48%)
__oral_status, n (%)__	582					<0.001
control		260 (45%)	79 (60%)	86 (40%)	95 (41%)
disease		322 (55%)	53 (40%)	131 (60%)	138 (59%)
__Periodontitis, n (%)__	582					<0.001
FALSE		379 (65%)	109 (83%)	131 (60%)	139 (60%)
TRUE		203 (35%)	23 (17%)	86 (40%)	94 (40%)
__Caries, n (%)__	582					0.048
FALSE		422 (73%)	107 (81%)	150 (69%)	165 (71%)
TRUE		160 (27%)	25 (19%)	67 (31%)	68 (29%)
__clinical_study, n (%)__	582					<0.001
This study		200 (34%)	132 (100%)	34 (16%)	34 (15%)
Schmartz et al 2024		382 (66%)	0 (0%)	183 (84%)	199 (85%)

## Sheet: SupplementaryTable7
sample_id	clinical_study	patient_id	included_analysis
A_1	CrossSectional	H_1	cross_sectional,SGBs
A_10	CrossSectional	H_10	cross_sectional,SGBs
A_100	CrossSectional	H_100	cross_sectional,SGBs
A_101	CrossSectional	H_101	cross_sectional,SGBs
A_103	CrossSectional	H_103	cross_sectional,SGBs
A_104	CrossSectional	H_104	cross_sectional,SGBs
A_105	CrossSectional	H_105	cross_sectional,SGBs
A_106	CrossSectional	H_106	cross_sectional,SGBs
A_107	CrossSectional	H_107	cross_sectional,SGBs
A_108	CrossSectional	H_108	cross_sectional,SGBs
A_109	CrossSectional	H_109	cross_sectional,SGBs
A_11	CrossSectional	H_11	cross_sectional,SGBs
A_110	CrossSectional	H_110	cross_sectional,SGBs
A_111	CrossSectional	H_111	cross_sectional,SGBs
A_112	CrossSectional	H_112	cross_sectional,SGBs
A_113	CrossSectional	H_49	SGBs
A_114	CrossSectional	H_49	SGBs
A_115	CrossSectional	H_115	SGBs
A_116	CrossSectional	H_116	SGBs
A_117	CrossSectional	H_117	cross_sectional,SGBs
A_118	CrossSectional	H_118	cross_sectional,SGBs
A_119	CrossSectional	H_119	cross_sectional,SGBs
A_12	CrossSectional	H_12	cross_sectional,SGBs
A_120	CrossSectional	H_120	cross_sectional,SGBs
A_121	CrossSectional	H_121	cross_sectional,SGBs
A_122	CrossSectional	H_122	cross_sectional,SGBs
A_123	CrossSectional	H_123	cross_sectional,SGBs
A_124	CrossSectional	H_124	cross_sectional,SGBs
A_125	CrossSectional	H_125	cross_sectional,SGBs
A_126	CrossSectional	H_126	cross_sectional,SGBs
A_127	CrossSectional	H_127	cross_sectional,SGBs
A_128	CrossSectional	H_128	cross_sectional,SGBs
A_129	CrossSectional	H_129	cross_sectional,SGBs
A_13	CrossSectional	H_13	cross_sectional,SGBs
A_130	CrossSectional	H_130	cross_sectional,SGBs
A_131	CrossSectional	H_131	cross_sectional,SGBs
A_132	CrossSectional	H_132	cross_sectional,SGBs
A_133	CrossSectional	H_133	cross_sectional,SGBs
A_134	CrossSectional	H_134	cross_sectional,SGBs
A_135	CrossSectional	H_135	cross_sectional,SGBs
A_136	CrossSectional	H_136	cross_sectional,SGBs
A_137	CrossSectional	H_137	cross_sectional,SGBs
A_138	CrossSectional	H_138	cross_sectional,SGBs
A_139	CrossSectional	H_139	cross_sectional,SGBs
A_14	CrossSectional	H_14	cross_sectional,SGBs
A_140	CrossSectional	H_140	cross_sectional,SGBs
A_141	CrossSectional	H_141	cross_sectional,SGBs
A_142	CrossSectional	H_142	cross_sectional,SGBs
A_143	CrossSectional	H_143	cross_sectional,SGBs
A_144	CrossSectional	H_144	cross_sectional,SGBs
A_145	CrossSectional	H_145	cross_sectional,SGBs
A_146	CrossSectional	H_146	cross_sectional,SGBs
A_147	CrossSectional	H_147	cross_sectional,SGBs
A_148	CrossSectional	H_148	cross_sectional,SGBs
A_148_2	CrossSectional	H_148	SGBs
A_149	CrossSectional	H_149	SGBs
A_15	CrossSectional	H_15	cross_sectional,SGBs
A_150	CrossSectional	H_149	cross_sectional,specimen_comparison,SGBs
A_151	CrossSectional	H_151	SGBs
A_16	CrossSectional	H_16	cross_sectional,specimen_comparison,SGBs
A_17	CrossSectional	H_17	cross_sectional,specimen_comparison,SGBs
A_18	CrossSectional	H_18	cross_sectional,SGBs
A_19	CrossSectional	H_19	cross_sectional,SGBs
A_2	CrossSectional	H_2	cross_sectional,SGBs
A_20	CrossSectional	H_20	cross_sectional,specimen_comparison,SGBs
A_21	CrossSectional	H_21	cross_sectional,specimen_comparison,SGBs
A_213_1	CrossSectional	H_213	SGBs
A_22	CrossSectional	H_22	specimen_comparison,SGBs
A_23	CrossSectional	H_23	cross_sectional,SGBs
A_24	CrossSectional	H_24	cross_sectional,specimen_comparison,SGBs
A_25	CrossSectional	H_25	cross_sectional,SGBs
A_26	CrossSectional	H_25	SGBs
A_27	CrossSectional	H_27	SGBs
A_28	CrossSectional	H_27	cross_sectional,SGBs
A_29	CrossSectional	H_29	cross_sectional,specimen_comparison,SGBs
A_3	CrossSectional	H_3	cross_sectional,SGBs
A_30	CrossSectional	H_30	cross_sectional,specimen_comparison,SGBs
A_31	CrossSectional	H_31	cross_sectional,SGBs
A_32	CrossSectional	H_32	cross_sectional,SGBs
A_33	CrossSectional	H_33	cross_sectional,specimen_comparison,SGBs
A_34	CrossSectional	H_34	cross_sectional,specimen_comparison,SGBs
A_35	CrossSectional	H_35	cross_sectional,specimen_comparison,SGBs
A_36	CrossSectional	H_36	cross_sectional,specimen_comparison,SGBs
A_37	CrossSectional	H_37	cross_sectional,specimen_comparison,SGBs
A_38	CrossSectional	H_38	cross_sectional,specimen_comparison,SGBs
A_39	CrossSectional	H_39	cross_sectional,specimen_comparison,SGBs
A_4	CrossSectional	H_4	cross_sectional,SGBs
A_40	CrossSectional	H_40	cross_sectional,SGBs
A_41	CrossSectional	H_41	cross_sectional,specimen_comparison,SGBs
A_42	CrossSectional	H_42	cross_sectional,specimen_comparison,SGBs
A_43	CrossSectional	H_43	cross_sectional,SGBs
A_44	CrossSectional	H_44	cross_sectional,specimen_comparison,SGBs
A_45	CrossSectional	H_45	cross_sectional,specimen_comparison,SGBs
A_46	CrossSectional	H_46	cross_sectional,specimen_comparison,SGBs
A_47	CrossSectional	H_47	cross_sectional,SGBs
A_48	CrossSectional	H_48	cross_sectional,SGBs
A_49	CrossSectional	H_49	SGBs
A_5	CrossSectional	H_5	cross_sectional,SGBs
A_50	CrossSectional	H_50	cross_sectional,SGBs
A_51	CrossSectional	H_51	cross_sectional,SGBs
A_52	CrossSectional	H_52	cross_sectional,SGBs
A_53	CrossSectional	H_53	cross_sectional,SGBs
A_54	CrossSectional	H_54	cross_sectional,SGBs
A_55	CrossSectional	H_55	cross_sectional,SGBs
A_56	CrossSectional	H_56	cross_sectional,specimen_comparison,SGBs
A_57	CrossSectional	H_81	cross_sectional,SGBs
A_58	CrossSectional	H_58	cross_sectional,SGBs
A_59	CrossSectional	H_59	cross_sectional,SGBs
A_6	CrossSectional	H_6	cross_sectional,SGBs
A_60	CrossSectional	H_60	cross_sectional,SGBs
A_61	CrossSectional	H_61	cross_sectional,SGBs
A_62	CrossSectional	H_62	cross_sectional,SGBs
A_63	CrossSectional	H_62	SGBs
A_64	CrossSectional	H_62	SGBs
A_65	CrossSectional	H_62	SGBs
A_66	CrossSectional	H_62	SGBs
A_67	CrossSectional	H_62	SGBs
A_68	CrossSectional	H_68	cross_sectional,SGBs
A_69	CrossSectional	H_69	cross_sectional,SGBs
A_7	CrossSectional	H_7	cross_sectional,SGBs
A_70	CrossSectional	H_22	cross_sectional,SGBs
A_71	CrossSectional	H_71	cross_sectional,specimen_comparison,SGBs
A_72	CrossSectional	H_72	cross_sectional,specimen_comparison,SGBs
A_73	CrossSectional	H_73	cross_sectional,specimen_comparison,SGBs
A_74	CrossSectional	H_49	cross_sectional,SGBs
A_75	CrossSectional	H_75	cross_sectional,specimen_comparison,SGBs
A_76	CrossSectional	H_76	cross_sectional,specimen_comparison,SGBs
A_77	CrossSectional	H_77	cross_sectional,specimen_comparison,SGBs
A_78	CrossSectional	H_78	cross_sectional,specimen_comparison,SGBs
A_79	CrossSectional	H_49	SGBs
A_8	CrossSectional	H_8	cross_sectional,SGBs
A_80	CrossSectional	H_80	cross_sectional,specimen_comparison,SGBs
A_81	CrossSectional	H_81	specimen_comparison,SGBs
A_82	CrossSectional	H_82	cross_sectional,specimen_comparison,SGBs
A_83	CrossSectional	H_83	cross_sectional,specimen_comparison,SGBs
A_84	CrossSectional	H_84	cross_sectional,specimen_comparison,SGBs
A_85	CrossSectional	H_85	cross_sectional,SGBs
A_86	CrossSectional	H_85	SGBs
A_87	CrossSectional	H_87	cross_sectional,SGBs
A_88	CrossSectional	H_88	cross_sectional,SGBs
A_89	CrossSectional	H_89	cross_sectional,SGBs
A_9	CrossSectional	H_9	cross_sectional,SGBs
A_90	CrossSectional	H_90	cross_sectional,SGBs
A_91	CrossSectional	H_91	cross_sectional,SGBs
A_92	CrossSectional	H_92	cross_sectional,SGBs
A_93	CrossSectional	H_93	cross_sectional,SGBs
A_94	CrossSectional	H_94	cross_sectional,SGBs
A_95	CrossSectional	H_95	cross_sectional,SGBs
A_96	CrossSectional	H_96	cross_sectional,SGBs
A_97	CrossSectional	H_97	cross_sectional,SGBs
A_98	CrossSectional	H_98	cross_sectional,SGBs
A_99	CrossSectional	H_99	cross_sectional,SGBs
AB1000_Plaque	Imagine	AB1000	cross_sectional,SGBs
AB1000_Saliva	Imagine	AB1000	cross_sectional,SGBs
AB1001_Plaque	Imagine	AB1001	cross_sectional,SGBs
AB1001_Saliva	Imagine	AB1001	cross_sectional,SGBs
AB1003_Saliva	Imagine	AB1003	cross_sectional,SGBs
AB1004_Plaque	Imagine	AB1004	cross_sectional,SGBs
AB1004_Saliva	Imagine	AB1004	cross_sectional,SGBs
AB1005_Plaque	Imagine	AB1005	cross_sectional,SGBs
AB1005_Saliva	Imagine	AB1005	cross_sectional,SGBs
AB1006_Plaque	Imagine	AB1006	cross_sectional,SGBs
AB1006_Saliva	Imagine	AB1006	cross_sectional,SGBs
AB1007_Plaque	Imagine	AB1007	cross_sectional,SGBs
AB1007_Saliva	Imagine	AB1007	cross_sectional,SGBs
AB1010_Plaque	Imagine	AB1010	cross_sectional,SGBs
AB1010_Saliva	Imagine	AB1010	cross_sectional,SGBs
AB1011_Plaque	Imagine	AB1011	cross_sectional,SGBs
AB1011_Saliva	Imagine	AB1011	cross_sectional,SGBs
AB1012_Saliva	Imagine	AB1012	cross_sectional,SGBs
AB1013_Saliva	Imagine	AB1013	cross_sectional,SGBs
AB1014_Saliva	Imagine	AB1014	cross_sectional,SGBs
AB1015_Saliva	Imagine	AB1015	cross_sectional,SGBs
AB1017_Saliva	Imagine	AB1017	cross_sectional,SGBs
AB1018_Saliva	Imagine	AB1018	cross_sectional,SGBs
AB1019_Plaque	Imagine	AB1019	cross_sectional,SGBs
AB1019_Saliva	Imagine	AB1019	cross_sectional,SGBs
AB1021_Plaque	Imagine	AB1021	cross_sectional,SGBs
AB1021_Saliva	Imagine	AB1021	cross_sectional,SGBs
AB1022_Plaque	Imagine	AB1022	cross_sectional,SGBs
AB1022_Saliva	Imagine	AB1022	cross_sectional,SGBs
AB1023_Plaque	Imagine	AB1023	cross_sectional,SGBs
AB1023_Saliva	Imagine	AB1023	cross_sectional,SGBs
AB1032_Plaque	Imagine	AB1032	cross_sectional,SGBs
AB1032_Saliva	Imagine	AB1032	cross_sectional,SGBs
AB1033_Plaque	Imagine	AB1033	cross_sectional,SGBs
AB1033_Saliva	Imagine	AB1033	cross_sectional,SGBs
AB1034_Plaque	Imagine	AB1034	cross_sectional,SGBs
AB1034_Saliva	Imagine	AB1034	cross_sectional,SGBs
AB1035_Plaque	Imagine	AB1035	cross_sectional,SGBs
AB1035_Saliva	Imagine	AB1035	cross_sectional,SGBs
AB1036_Plaque	Imagine	AB1036	cross_sectional,SGBs
AB1036_Saliva	Imagine	AB1036	cross_sectional,SGBs
AB1039_Plaque	Imagine	AB1039	cross_sectional,SGBs
AB1039_Saliva	Imagine	AB1039	cross_sectional,SGBs
AB1048_Plaque	Imagine	AB1048	cross_sectional,SGBs
AB1048_Saliva	Imagine	AB1048	cross_sectional,SGBs
AB1051_Plaque	Imagine	AB1051	cross_sectional,SGBs
AB1051_Saliva	Imagine	AB1051	cross_sectional,SGBs
AB1052_Plaque	Imagine	AB1052	cross_sectional,SGBs
AB1053_Plaque	Imagine	AB1053	cross_sectional,SGBs
AB1053_Saliva	Imagine	AB1053	cross_sectional,SGBs
AB1057_Plaque	Imagine	AB1057	cross_sectional,SGBs
AB1057_Saliva	Imagine	AB1057	cross_sectional,SGBs
AB1059_Plaque	Imagine	AB1059	cross_sectional,SGBs
AB1059_Saliva	Imagine	AB1059	cross_sectional,SGBs
AB1060_Plaque	Imagine	AB1060	cross_sectional,SGBs
AB1061_Plaque	Imagine	AB1061	cross_sectional,SGBs
AB1061_Saliva	Imagine	AB1061	cross_sectional,SGBs
AB1064_Plaque	Imagine	AB1064	cross_sectional,SGBs
AB1064_Saliva	Imagine	AB1064	cross_sectional,SGBs
AB1065_Plaque	Imagine	AB1065	cross_sectional,SGBs
AB1065_Saliva	Imagine	AB1065	cross_sectional,SGBs
AB1068_Plaque	Imagine	AB1068	cross_sectional,SGBs
AB1068_Saliva	Imagine	AB1068	cross_sectional,SGBs
AB1073_Plaque	Imagine	AB1073	cross_sectional,SGBs
AB1073_Saliva	Imagine	AB1073	cross_sectional,SGBs
AB1088_Plaque	Imagine	AB1088	cross_sectional,SGBs
AB1088_Saliva	Imagine	AB1088	cross_sectional,SGBs
AB1089_Plaque	Imagine	AB1089	cross_sectional,SGBs
AB1089_Saliva	Imagine	AB1089	cross_sectional,SGBs
AB1091_Plaque	Imagine	AB1091	cross_sectional,SGBs
AB1091_Saliva	Imagine	AB1091	cross_sectional,SGBs
AB1093_Plaque	Imagine	AB1093	cross_sectional,SGBs
AB1093_Saliva	Imagine	AB1093	cross_sectional,SGBs
AB1095_Plaque	Imagine	AB1095	cross_sectional,SGBs
AB1095_Saliva	Imagine	AB1095	cross_sectional,SGBs
AB1107_Plaque	Imagine	AB1107	cross_sectional,SGBs
AB1107_Saliva	Imagine	AB1107	cross_sectional,SGBs
AB1113_Saliva	Imagine	AB1113	cross_sectional,SGBs
AB1120_Plaque	Imagine	AB1120	cross_sectional,SGBs
AB1131_Saliva	Imagine	AB1131	cross_sectional,SGBs
AB1138_Plaque	Imagine	AB1138	cross_sectional,SGBs
AB1138_Saliva	Imagine	AB1138	cross_sectional,SGBs
AB1141_Plaque	Imagine	AB1141	cross_sectional,SGBs
AB1141_Saliva	Imagine	AB1141	cross_sectional,SGBs
AB1158_Saliva	Imagine	AB1158	cross_sectional,SGBs
AB1164_Plaque	Imagine	AB1164	cross_sectional,SGBs
AB1164_Saliva	Imagine	AB1164	cross_sectional,SGBs
AB1166_Plaque	Imagine	AB1166	cross_sectional,SGBs
AB1166_Saliva	Imagine	AB1166	cross_sectional,SGBs
AB1176_Plaque	Imagine	AB1176	cross_sectional,SGBs
AB1181_Saliva	Imagine	AB1181	cross_sectional,SGBs
AB1197_Saliva	Imagine	AB1197	cross_sectional,SGBs
AB1199_Saliva	Imagine	AB1199	cross_sectional,SGBs
AB1200_Saliva	Imagine	AB1200	cross_sectional,SGBs
AB1210_Plaque	Imagine	AB1210	cross_sectional,SGBs
AB1210_Saliva	Imagine	AB1210	cross_sectional,SGBs
AB1213_Plaque	Imagine	AB1213	cross_sectional,SGBs
AB1213_Saliva	Imagine	AB1213	cross_sectional,SGBs
AB1214_Plaque	Imagine	AB1214	cross_sectional,SGBs
AB1214_Saliva	Imagine	AB1214	cross_sectional,SGBs
AB1219_Plaque	Imagine	AB1219	cross_sectional,SGBs
AB1219_Saliva	Imagine	AB1219	cross_sectional,SGBs
AB1225_Plaque	Imagine	AB1225	cross_sectional,SGBs
AB1225_Saliva	Imagine	AB1225	cross_sectional,SGBs
AB1227_Plaque	Imagine	AB1227	cross_sectional,SGBs
AB1227_Saliva	Imagine	AB1227	cross_sectional,SGBs
AB1229_Plaque	Imagine	AB1229	cross_sectional,SGBs
AB1229_Saliva	Imagine	AB1229	cross_sectional,SGBs
AB1231_Plaque	Imagine	AB1231	cross_sectional,SGBs
AB1231_Saliva	Imagine	AB1231	cross_sectional,SGBs
AB1232_Plaque	Imagine	AB1232	cross_sectional,SGBs
AB1232_Saliva	Imagine	AB1232	cross_sectional,SGBs
AB1233_Plaque	Imagine	AB1233	cross_sectional,SGBs
AB1233_Saliva	Imagine	AB1233	cross_sectional,SGBs
AB1234_Plaque	Imagine	AB1234	cross_sectional,SGBs
AB1234_Saliva	Imagine	AB1234	cross_sectional,SGBs
AB1237_Plaque	Imagine	AB1237	cross_sectional,SGBs
AB1237_Saliva	Imagine	AB1237	cross_sectional,SGBs
AB1239_Plaque	Imagine	AB1239	cross_sectional,SGBs
AB1239_Saliva	Imagine	AB1239	cross_sectional,SGBs
AB1241_Plaque	Imagine	AB1241	cross_sectional,SGBs
AB1241_Saliva	Imagine	AB1241	cross_sectional,SGBs
AB1243_Plaque	Imagine	AB1243	cross_sectional,SGBs
AB1243_Saliva	Imagine	AB1243	cross_sectional,SGBs
AB1244_Plaque	Imagine	AB1244	cross_sectional,SGBs
AB1244_Saliva	Imagine	AB1244	cross_sectional,SGBs
AB1253_Plaque	Imagine	AB1253	cross_sectional,SGBs
AB1253_Saliva	Imagine	AB1253	cross_sectional,SGBs
AB1254_Plaque	Imagine	AB1254	cross_sectional,SGBs
AB1254_Saliva	Imagine	AB1254	cross_sectional,SGBs
AB1255_Saliva	Imagine	AB1255	cross_sectional,SGBs
AB1259_Plaque	Imagine	AB1259	cross_sectional,SGBs
AB1259_Saliva	Imagine	AB1259	cross_sectional,SGBs
AB1260_Plaque	Imagine	AB1260	cross_sectional,SGBs
AB1260_Saliva	Imagine	AB1260	cross_sectional,SGBs
AB1262_Plaque	Imagine	AB1262	cross_sectional,SGBs
AB1262_Saliva	Imagine	AB1262	cross_sectional,SGBs
AB1264_Plaque	Imagine	AB1264	cross_sectional,SGBs
AB1264_Saliva	Imagine	AB1264	cross_sectional,SGBs
AB1265_Plaque	Imagine	AB1265	cross_sectional,SGBs
AB1265_Saliva	Imagine	AB1265	cross_sectional,SGBs
AB1266_Plaque	Imagine	AB1266	cross_sectional,SGBs
AB1266_Saliva	Imagine	AB1266	cross_sectional,SGBs
AB1268_Plaque	Imagine	AB1268	cross_sectional,SGBs
AB1268_Saliva	Imagine	AB1268	cross_sectional,SGBs
AB1270_Plaque	Imagine	AB1270	cross_sectional,SGBs
AB1270_Saliva	Imagine	AB1270	cross_sectional,SGBs
AB1271_Plaque	Imagine	AB1271	cross_sectional,SGBs
AB1271_Saliva	Imagine	AB1271	cross_sectional,SGBs
AB1273_Plaque	Imagine	AB1273	cross_sectional,SGBs
AB1273_Saliva	Imagine	AB1273	cross_sectional,SGBs
AB1275_Plaque	Imagine	AB1275	cross_sectional,SGBs
AB1275_Saliva	Imagine	AB1275	cross_sectional,SGBs
AB1276_Plaque	Imagine	AB1276	cross_sectional,SGBs
AB1276_Saliva	Imagine	AB1276	cross_sectional,SGBs
AB1278_Plaque	Imagine	AB1278	cross_sectional,SGBs
AB1278_Saliva	Imagine	AB1278	cross_sectional,SGBs
AB1279_Plaque	Imagine	AB1279	cross_sectional,SGBs
AB1279_Saliva	Imagine	AB1279	cross_sectional,SGBs
AB1281_Plaque	Imagine	AB1281	cross_sectional,SGBs
AB1281_Saliva	Imagine	AB1281	cross_sectional
AB1283_Saliva	Imagine	AB1283	cross_sectional,SGBs
AB1284_Plaque	Imagine	AB1284	cross_sectional,SGBs
AB1284_Saliva	Imagine	AB1284	cross_sectional,SGBs
AB1285_Plaque	Imagine	AB1285	cross_sectional,SGBs
AB1285_Saliva	Imagine	AB1285	cross_sectional,SGBs
AB1288_Plaque	Imagine	AB1288	cross_sectional,SGBs
AB1288_Saliva	Imagine	AB1288	cross_sectional,SGBs
AB1292_Plaque	Imagine	AB1292	cross_sectional,SGBs
AB1292_Saliva	Imagine	AB1292	cross_sectional,SGBs
AB1294_Plaque	Imagine	AB1294	cross_sectional,SGBs
AB1294_Saliva	Imagine	AB1294	cross_sectional,SGBs
AB1297_Plaque	Imagine	AB1297	cross_sectional,SGBs
AB1297_Saliva	Imagine	AB1297	cross_sectional,SGBs
AB1298_Plaque	Imagine	AB1298	cross_sectional,SGBs
AB1298_Saliva	Imagine	AB1298	cross_sectional,SGBs
AB1300_Plaque	Imagine	AB1300	cross_sectional,SGBs
AB1300_Saliva	Imagine	AB1300	cross_sectional,SGBs
AB1302_Plaque	Imagine	AB1302	cross_sectional,SGBs
AB1306_Plaque	Imagine	AB1306	cross_sectional,SGBs
AB1306_Saliva	Imagine	AB1306	cross_sectional,SGBs
AB1312_Saliva	Imagine	AB1312	cross_sectional,SGBs
AB1313_Plaque	Imagine	AB1313	cross_sectional,SGBs
AB1313_Saliva	Imagine	AB1313	cross_sectional,SGBs
AB1314_Saliva	Imagine	AB1314	cross_sectional,SGBs
AB1322_Plaque	Imagine	AB1322	cross_sectional,SGBs
AB1322_Saliva	Imagine	AB1322	cross_sectional,SGBs
AB1335_Plaque	Imagine	AB1335	cross_sectional,SGBs
AB1335_Saliva	Imagine	AB1335	cross_sectional,SGBs
AB1348_Plaque	Imagine	AB1348	cross_sectional,SGBs
AB1348_Saliva	Imagine	AB1348	cross_sectional,SGBs
AB1351_Plaque	Imagine	AB1351	cross_sectional,SGBs
AB1351_Saliva	Imagine	AB1351	cross_sectional,SGBs
AB1352_Plaque	Imagine	AB1352	cross_sectional,SGBs
AB1352_Saliva	Imagine	AB1352	cross_sectional,SGBs
AB1371_Plaque	Imagine	AB1371	cross_sectional,SGBs
AB1373_Saliva	Imagine	AB1373	cross_sectional,SGBs
AB1375_Plaque	Imagine	AB1375	cross_sectional,SGBs
AB1375_Saliva	Imagine	AB1375	cross_sectional,SGBs
AB1376_Plaque	Imagine	AB1376	cross_sectional,SGBs
AB1376_Saliva	Imagine	AB1376	cross_sectional,SGBs
AB1377_Plaque	Imagine	AB1377	cross_sectional,SGBs
AB1377_Saliva	Imagine	AB1377	cross_sectional,SGBs
AB1378_Plaque	Imagine	AB1378	cross_sectional,SGBs
AB1379_Plaque	Imagine	AB1379	cross_sectional,SGBs
AB1379_Saliva	Imagine	AB1379	cross_sectional,SGBs
AB1383_Plaque	Imagine	AB1383	cross_sectional,SGBs
AB1383_Saliva	Imagine	AB1383	cross_sectional,SGBs
AB1384_Plaque	Imagine	AB1384	cross_sectional,SGBs
AB1384_Saliva	Imagine	AB1384	cross_sectional,SGBs
AB1386_Plaque	Imagine	AB1386	cross_sectional,SGBs
AB1386_Saliva	Imagine	AB1386	cross_sectional,SGBs
AB1388_Plaque	Imagine	AB1388	cross_sectional,SGBs
AB1388_Saliva	Imagine	AB1388	cross_sectional,SGBs
AB1390_Plaque	Imagine	AB1390	cross_sectional,SGBs
AB1392_Plaque	Imagine	AB1392	cross_sectional,SGBs
AB1392_Saliva	Imagine	AB1392	cross_sectional,SGBs
AB1394_Plaque	Imagine	AB1394	cross_sectional,SGBs
AB1394_Saliva	Imagine	AB1394	cross_sectional,SGBs
AB1396_Plaque	Imagine	AB1396	cross_sectional,SGBs
AB1396_Saliva	Imagine	AB1396	cross_sectional,SGBs
AB1398_Plaque	Imagine	AB1398	cross_sectional,SGBs
AB1398_Saliva	Imagine	AB1398	cross_sectional,SGBs
AB1399_Plaque	Imagine	AB1399	cross_sectional,SGBs
AB1399_Saliva	Imagine	AB1399	cross_sectional,SGBs
AB1401_Plaque	Imagine	AB1401	cross_sectional,SGBs
AB1401_Saliva	Imagine	AB1401	cross_sectional,SGBs
AB1402_Plaque	Imagine	AB1402	cross_sectional,SGBs
AB1402_Saliva	Imagine	AB1402	cross_sectional,SGBs
AB1413_Plaque	Imagine	AB1413	cross_sectional,SGBs
AB1413_Saliva	Imagine	AB1413	cross_sectional,SGBs
AB1414_Saliva	Imagine	AB1414	cross_sectional,SGBs
AB1415_Plaque	Imagine	AB1415	cross_sectional,SGBs
AB1415_Saliva	Imagine	AB1415	cross_sectional,SGBs
AB1416_Plaque	Imagine	AB1416	cross_sectional,SGBs
AB1416_Saliva	Imagine	AB1416	cross_sectional,SGBs
AB1427_Plaque	Imagine	AB1427	cross_sectional,SGBs
AB1427_Saliva	Imagine	AB1427	cross_sectional,SGBs
AB1428_Plaque	Imagine	AB1428	cross_sectional,SGBs
AB1428_Saliva	Imagine	AB1428	cross_sectional,SGBs
AB1430_Plaque	Imagine	AB1430	cross_sectional,SGBs
AB1430_Saliva	Imagine	AB1430	cross_sectional,SGBs
AB1431_Saliva	Imagine	AB1431	cross_sectional,SGBs
AB1446_Plaque	Imagine	AB1446	cross_sectional,SGBs
AB1446_Saliva	Imagine	AB1446	cross_sectional,SGBs
AB1448_Saliva	Imagine	AB1448	cross_sectional,SGBs
AB1449_Plaque	Imagine	AB1449	cross_sectional,SGBs
AB1449_Saliva	Imagine	AB1449	cross_sectional,SGBs
AB1450_Plaque	Imagine	AB1450	cross_sectional,SGBs
AB1450_Saliva	Imagine	AB1450	cross_sectional,SGBs
AB1451_Plaque	Imagine	AB1451	cross_sectional,SGBs
AB1451_Saliva	Imagine	AB1451	cross_sectional,SGBs
AB1452_Plaque	Imagine	AB1452	cross_sectional,SGBs
AB1452_Saliva	Imagine	AB1452	cross_sectional,SGBs
AB1454_Saliva	Imagine	AB1454	cross_sectional,SGBs
AB1457_Plaque	Imagine	AB1457	cross_sectional,SGBs
AB1457_Saliva	Imagine	AB1457	cross_sectional,SGBs
AB1458_Plaque	Imagine	AB1458	cross_sectional,SGBs
AB1458_Saliva	Imagine	AB1458	cross_sectional,SGBs
AB1460_Plaque	Imagine	AB1460	cross_sectional,SGBs
AB1460_Saliva	Imagine	AB1460	cross_sectional,SGBs
AB1461_Plaque	Imagine	AB1461	cross_sectional,SGBs
AB1461_Saliva	Imagine	AB1461	cross_sectional,SGBs
AB1462_Plaque	Imagine	AB1462	cross_sectional,SGBs
AB1462_Saliva	Imagine	AB1462	cross_sectional,SGBs
AB1464_Plaque	Imagine	AB1464	cross_sectional,SGBs
AB1464_Saliva	Imagine	AB1464	cross_sectional,SGBs
AB1484_Plaque	Imagine	AB1484	cross_sectional,SGBs
AB1484_Saliva	Imagine	AB1484	cross_sectional,SGBs
AB1485_Plaque	Imagine	AB1485	cross_sectional,SGBs
AB1485_Saliva	Imagine	AB1485	cross_sectional,SGBs
AB1486_Plaque	Imagine	AB1486	cross_sectional,SGBs
AB1486_Saliva	Imagine	AB1486	cross_sectional,SGBs
AB1490_Plaque	Imagine	AB1490	cross_sectional,SGBs
AB1490_Saliva	Imagine	AB1490	cross_sectional,SGBs
AB1492_Plaque	Imagine	AB1492	cross_sectional,SGBs
AB1492_Saliva	Imagine	AB1492	cross_sectional,SGBs
AB1493_Plaque	Imagine	AB1493	cross_sectional,SGBs
AB1493_Saliva	Imagine	AB1493	cross_sectional,SGBs
AB1495_Plaque	Imagine	AB1495	cross_sectional,SGBs
AB1495_Saliva	Imagine	AB1495	cross_sectional,SGBs
AB1497_Plaque	Imagine	AB1497	cross_sectional,SGBs
AB1497_Saliva	Imagine	AB1497	cross_sectional,SGBs
AB1498_Plaque	Imagine	AB1498	cross_sectional,SGBs
AB1498_Saliva	Imagine	AB1498	cross_sectional,SGBs
AB1627_Plaque	Imagine	AB1627	cross_sectional,SGBs
AB1627_Saliva	Imagine	AB1627	cross_sectional,SGBs
AB1628_Plaque	Imagine	AB1628	cross_sectional,SGBs
AB1628_Saliva	Imagine	AB1628	cross_sectional,SGBs
AB1635_Plaque	Imagine	AB1635	cross_sectional,SGBs
AB1635_Saliva	Imagine	AB1635	cross_sectional,SGBs
AB1636_Plaque	Imagine	AB1636	cross_sectional,SGBs
AB1636_Saliva	Imagine	AB1636	cross_sectional,SGBs
AB1637_Plaque	Imagine	AB1637	cross_sectional,SGBs
AB1637_Saliva	Imagine	AB1637	cross_sectional,SGBs
AB1638_Plaque	Imagine	AB1638	cross_sectional,SGBs
AB1638_Saliva	Imagine	AB1638	cross_sectional,SGBs
AB1645_Saliva	Imagine	AB1645	cross_sectional,SGBs
AB1648_Plaque	Imagine	AB1648	cross_sectional,SGBs
AB1648_Saliva	Imagine	AB1648	cross_sectional,SGBs
AB1654_Plaque	Imagine	AB1654	cross_sectional,SGBs
AB1654_Saliva	Imagine	AB1654	cross_sectional,SGBs
AB1656_Plaque	Imagine	AB1656	cross_sectional,SGBs
AB1656_Saliva	Imagine	AB1656	cross_sectional,SGBs
AB1657_Plaque	Imagine	AB1657	cross_sectional,SGBs
AB1657_Saliva	Imagine	AB1657	cross_sectional,SGBs
AB1660_Plaque	Imagine	AB1660	cross_sectional,SGBs
AB1660_Saliva	Imagine	AB1660	cross_sectional,SGBs
AB1662_Plaque	Imagine	AB1662	cross_sectional,SGBs
AB1662_Saliva	Imagine	AB1662	cross_sectional,SGBs
AB1664_Plaque	Imagine	AB1664	cross_sectional,SGBs
AB1664_Saliva	Imagine	AB1664	cross_sectional,SGBs
AB1671_Plaque	Imagine	AB1671	cross_sectional,SGBs
AB1671_Saliva	Imagine	AB1671	cross_sectional,SGBs
AB1675_Plaque	Imagine	AB1675	cross_sectional,SGBs
AB1675_Saliva	Imagine	AB1675	cross_sectional,SGBs
AB1680_Plaque	Imagine	AB1680	cross_sectional,SGBs
AB1680_Saliva	Imagine	AB1680	cross_sectional,SGBs
AB1684_Plaque	Imagine	AB1684	cross_sectional,SGBs
AB1684_Saliva	Imagine	AB1684	cross_sectional,SGBs
AB1685_Plaque	Imagine	AB1685	cross_sectional,SGBs
AB1685_Saliva	Imagine	AB1685	cross_sectional,SGBs
AB1686_Plaque	Imagine	AB1686	cross_sectional,SGBs
AB1686_Saliva	Imagine	AB1686	cross_sectional,SGBs
AB1692_Plaque	Imagine	AB1692	cross_sectional,SGBs
AB1692_Saliva	Imagine	AB1692	cross_sectional,SGBs
AB1694_Plaque	Imagine	AB1694	cross_sectional,SGBs
AB1694_Saliva	Imagine	AB1694	cross_sectional,SGBs
AB1698_Plaque	Imagine	AB1698	cross_sectional,SGBs
AB1698_Saliva	Imagine	AB1698	cross_sectional,SGBs
AB1699_Plaque	Imagine	AB1699	cross_sectional,SGBs
AB1699_Saliva	Imagine	AB1699	cross_sectional,SGBs
AB1700_Plaque	Imagine	AB1700	cross_sectional,SGBs
AB1700_Saliva	Imagine	AB1700	cross_sectional,SGBs
AB1701_Plaque	Imagine	AB1701	cross_sectional,SGBs
AB1701_Saliva	Imagine	AB1701	cross_sectional,SGBs
AB1702_Plaque	Imagine	AB1702	cross_sectional,SGBs
AB1702_Saliva	Imagine	AB1702	cross_sectional,SGBs
AB1703_Plaque	Imagine	AB1703	cross_sectional,SGBs
AB1703_Saliva	Imagine	AB1703	cross_sectional,SGBs
AB1704_Plaque	Imagine	AB1704	cross_sectional,SGBs
AB1704_Saliva	Imagine	AB1704	cross_sectional,SGBs
AB1717_Plaque	Imagine	AB1717	cross_sectional,SGBs
AB1717_Saliva	Imagine	AB1717	cross_sectional,SGBs
AB1720_Plaque	Imagine	AB1720	cross_sectional,SGBs
AB1722_Saliva	Imagine	AB1722	cross_sectional,SGBs
AB1727_Plaque	Imagine	AB1727	cross_sectional,SGBs
AB1727_Saliva	Imagine	AB1727	cross_sectional,SGBs
AB1729_Plaque	Imagine	AB1729	cross_sectional,SGBs
AB1729_Saliva	Imagine	AB1729	cross_sectional,SGBs
AB1734_Plaque	Imagine	AB1734	cross_sectional,SGBs
AB1734_Saliva	Imagine	AB1734	cross_sectional,SGBs
AB1735_Plaque	Imagine	AB1735	cross_sectional,SGBs
AB1735_Saliva	Imagine	AB1735	cross_sectional,SGBs
AB1736_Plaque	Imagine	AB1736	cross_sectional,SGBs
AB1736_Saliva	Imagine	AB1736	cross_sectional,SGBs
AB1739_Saliva	Imagine	AB1739	cross_sectional,SGBs
AB1740_Saliva	Imagine	AB1740	cross_sectional,SGBs
AB1742_Plaque	Imagine	AB1742	cross_sectional,SGBs
AB1747_Plaque	Imagine	AB1747	cross_sectional,SGBs
AB1747_Saliva	Imagine	AB1747	cross_sectional,SGBs
AB1752_Plaque	Imagine	AB1752	cross_sectional,SGBs
AB1752_Saliva	Imagine	AB1752	cross_sectional,SGBs
AB1758_Plaque	Imagine	AB1758	cross_sectional,SGBs
AB1758_Saliva	Imagine	AB1758	cross_sectional,SGBs
AB1760_Plaque	Imagine	AB1760	cross_sectional,SGBs
AB1760_Saliva	Imagine	AB1760	cross_sectional,SGBs
AB1761_Plaque	Imagine	AB1761	cross_sectional,SGBs
AB1761_Saliva	Imagine	AB1761	cross_sectional,SGBs
AB1766_Plaque	Imagine	AB1766	cross_sectional,SGBs
AB1766_Saliva	Imagine	AB1766	cross_sectional,SGBs
AB1772_Plaque	Imagine	AB1772	cross_sectional,SGBs
AB1772_Saliva	Imagine	AB1772	cross_sectional
AB1781_Plaque	Imagine	AB1781	cross_sectional,SGBs
AB1781_Saliva	Imagine	AB1781	cross_sectional,SGBs
AB1790_Plaque	Imagine	AB1790	cross_sectional,SGBs
AB1794_Plaque	Imagine	AB1794	cross_sectional,SGBs
AB1794_Saliva	Imagine	AB1794	cross_sectional,SGBs
AB1801_Plaque	Imagine	AB1801	cross_sectional,SGBs
AB1801_Saliva	Imagine	AB1801	cross_sectional,SGBs
AB4181_Plaque	Imagine	AB4181	cross_sectional,SGBs
AB4181_Saliva	Imagine	AB4181	cross_sectional,SGBs
AC_1_1	Longitudinal	K_1	long-term,SGBs
AC_1_2	Longitudinal	K_1	long-term,SGBs
AC_10_1	Longitudinal	K_10	long-term,SGBs
AC_101_1	Longitudinal	K_101	long-term,SGBs
AC_103_1	Longitudinal	K_103	long-term,SGBs
AC_106_1	Longitudinal	K_106	long-term,SGBs
AC_112_1	Longitudinal	K_112	long-term,SGBs
AC_113_1	Longitudinal	K_113	long-term,SGBs
AC_12_1	Longitudinal	K_12	long-term,SGBs
AC_120_1	Longitudinal	K_120	long-term,SGBs
AC_121_1	Longitudinal	K_121	long-term,SGBs
AC_128_1	Longitudinal	K_128	long-term,SGBs
AC_129_1	Longitudinal	K_129	SGBs
AC_129_1_2	Longitudinal	K_129	long-term,SGBs
AC_130_1	Longitudinal	K_130	long-term,SGBs
AC_134_1	Longitudinal	K_134	long-term,SGBs
AC_135_1	Longitudinal	K_135	long-term,SGBs
AC_139_1	Longitudinal	K_139	long-term,SGBs
AC_139_2	Longitudinal	K_139	long-term,SGBs
AC_141_1	Longitudinal	K_141	long-term,SGBs
AC_142_1	Longitudinal	K_142	long-term,SGBs
AC_143_1	Longitudinal	K_143	long-term,SGBs
AC_144_1	Longitudinal	K_144	long-term,SGBs
AC_145_1	Longitudinal	K_145	long-term,SGBs
AC_146_1	Longitudinal	K_146	long-term,SGBs
AC_147_1	Longitudinal	K_147	long-term,SGBs
AC_149_1	Longitudinal	K_149	long-term,SGBs
AC_15_1	Longitudinal	K_15	long-term,SGBs
AC_150_1	Longitudinal	K_150	SGBs
AC_152_1	Longitudinal	K_152	long-term,SGBs
AC_154_1	Longitudinal	K_154	long-term,SGBs
AC_155_1	Longitudinal	K_155	long-term,SGBs
AC_159_1	Longitudinal	K_159	SGBs
AC_16_1	Longitudinal	K_16	long-term,SGBs
AC_161_1	Longitudinal	K_161	long-term,SGBs
AC_164_1	Longitudinal	K_164	long-term,SGBs
AC_166_1	Longitudinal	K_166	SGBs
AC_168_1	Longitudinal	K_168	SGBs
AC_17_1	Longitudinal	K_17	long-term,SGBs
AC_174_1	Longitudinal	K_174	long-term,SGBs
AC_175_1	Longitudinal	K_175	long-term,SGBs
AC_177_1	Longitudinal	K_177	long-term,SGBs
AC_179_1	Longitudinal	K_179	long-term,SGBs
AC_18_1	Longitudinal	K_18	long-term,SGBs
AC_184_1	Longitudinal	K_184	long-term,SGBs
AC_19_1	Longitudinal	K_19	long-term,SGBs
AC_2_1	Longitudinal	K_2	long-term,SGBs
AC_20_1	Longitudinal	K_20	long-term,SGBs
AC_22_1	Longitudinal	K_22	long-term,SGBs
AC_23_1	Longitudinal	K_23	long-term,SGBs
AC_24_1	Longitudinal	K_24	long-term,SGBs
AC_25_1	Longitudinal	K_25	long-term,SGBs
AC_26_1	Longitudinal	K_26	SGBs
AC_28_1	Longitudinal	K_28	long-term,SGBs
AC_29_1	Longitudinal	K_29	long-term,SGBs
AC_3_1	Longitudinal	K_3	long-term,SGBs
AC_30_1	Longitudinal	K_30	long-term,SGBs
AC_31_1	Longitudinal	K_31	long-term,SGBs
AC_33_1	Longitudinal	K_33	long-term,SGBs
AC_34_1	Longitudinal	K_34	long-term,SGBs
AC_35_1	Longitudinal	K_35	long-term,SGBs
AC_36_1	Longitudinal	K_36	long-term,SGBs
AC_38_1	Longitudinal	K_38	long-term,SGBs
AC_39_1	Longitudinal	K_39	long-term,SGBs
AC_4_1	Longitudinal	K_4	long-term,SGBs
AC_40_1	Longitudinal	K_40	long-term,SGBs
AC_41_1	Longitudinal	K_41	long-term,SGBs
AC_42_1	Longitudinal	K_42	long-term,SGBs
AC_43_1	Longitudinal	K_43	long-term,SGBs
AC_45_1	Longitudinal	K_45	long-term,SGBs
AC_46_1	Longitudinal	K_46	long-term,SGBs
AC_47_1	Longitudinal	K_47	long-term,SGBs
AC_48_1	Longitudinal	K_48	long-term,SGBs
AC_49_1	Longitudinal	K_49	long-term,SGBs
AC_5_1	Longitudinal	K_5	long-term,SGBs
AC_50_1	Longitudinal	K_50	long-term,SGBs
AC_52_1	Longitudinal	K_52	long-term,SGBs
AC_55_1	Longitudinal	K_55	long-term,SGBs
AC_56_1	Longitudinal	K_56	long-term,SGBs
AC_57_1	Longitudinal	K_57	long-term,SGBs
AC_59_1	Longitudinal	K_59	long-term,SGBs
AC_6_1	Longitudinal	K_6	long-term,SGBs
AC_60_1	Longitudinal	K_60	long-term,SGBs
AC_61_1	Longitudinal	K_61	long-term,SGBs
AC_63_1	Longitudinal	K_63	long-term,SGBs
AC_64_1	Longitudinal	K_64	long-term,SGBs
AC_65_1	Longitudinal	K_65	long-term,SGBs
AC_66_1	Longitudinal	K_66	long-term,SGBs
AC_67_1	Longitudinal	K_67	long-term,SGBs
AC_68_1	Longitudinal	K_68	long-term,SGBs
AC_70_1	Longitudinal	K_70	long-term,SGBs
AC_71_1	Longitudinal	K_71	long-term,SGBs
AC_72_1	Longitudinal	K_72	long-term,SGBs
AC_73_1	Longitudinal	K_73	long-term,SGBs
AC_74_1	Longitudinal	K_74	long-term,SGBs
AC_75_1	Longitudinal	K_75	long-term,SGBs
AC_76_1	Longitudinal	K_76	long-term,SGBs
AC_77_1	Longitudinal	K_77	long-term,SGBs
AC_78_1	Longitudinal	K_78	long-term,SGBs
AC_79_1	Longitudinal	K_79	long-term,SGBs
AC_79_2	Longitudinal	K_79	long-term,SGBs
AC_8_1	Longitudinal	K_8	long-term,SGBs
AC_80_1	Longitudinal	K_80	long-term,SGBs
AC_81_1	Longitudinal	K_81	long-term,SGBs
AC_82_1	Longitudinal	K_82	long-term,SGBs
AC_83_1	Longitudinal	K_83	long-term,SGBs
AC_84_1	Longitudinal	K_84	long-term,SGBs
AC_85_1	Longitudinal	K_85	long-term,SGBs
AC_86_1	Longitudinal	K_86	long-term,SGBs
AC_87_1	Longitudinal	K_87	long-term,SGBs
AC_88_1	Longitudinal	K_88	long-term,SGBs
AC_91_1	Longitudinal	K_91	long-term,SGBs
AC_92_1	Longitudinal	K_92	long-term,SGBs
AC_94_1	Longitudinal	K_94	long-term,SGBs
AC_95_1	Longitudinal	K_95	long-term,SGBs
AC_96_1	Longitudinal	K_96	long-term,SGBs
AC_97_1	Longitudinal	K_97	long-term,SGBs
AC_98_1	Longitudinal	K_98	long-term,SGBs
AC_99_1	Longitudinal	K_99	long-term,SGBs
CA_295_3	Longitudinal	K_295	long-term,SGBs
CC_219_2	Longitudinal	K_219	long-term,SGBs
CR_204_1	Longitudinal	K_204	long-term,SGBs
D1	SpatioTemporal	P_1	spatial,SGBs
D10	SpatioTemporal	P_1	spatial,SGBs
D100	SpatioTemporal	P_3	spatial,SGBs
D101	SpatioTemporal	P_3	spatial,SGBs
D102	SpatioTemporal	P_3	spatial,SGBs
D103	SpatioTemporal	P_2	spatial,SGBs
D104	SpatioTemporal	P_2	spatial,SGBs
D105	SpatioTemporal	P_2	spatial,SGBs
D106	SpatioTemporal	P_2	spatial,SGBs
D107	SpatioTemporal	P_2	spatial,SGBs
D108	SpatioTemporal	P_2	spatial,SGBs
D109	SpatioTemporal	P_1	spatial,SGBs
D11	SpatioTemporal	P_1	spatial,SGBs
D110	SpatioTemporal	P_1	spatial,SGBs
D111	SpatioTemporal	P_1	spatial,SGBs
D112	SpatioTemporal	P_1	spatial,SGBs
D113	SpatioTemporal	P_1	spatial,SGBs
D114	SpatioTemporal	P_1	spatial,SGBs
D115	SpatioTemporal	P_2	spatial,SGBs
D116	SpatioTemporal	P_2	spatial,SGBs
D117	SpatioTemporal	P_2	spatial,SGBs
D118	SpatioTemporal	P_2	spatial,SGBs
D119	SpatioTemporal	P_2	spatial,SGBs
D12	SpatioTemporal	P_1	spatial,SGBs
D120	SpatioTemporal	P_2	spatial,SGBs
D121	SpatioTemporal	P_3	spatial,SGBs
D122	SpatioTemporal	P_3	spatial,SGBs
D123	SpatioTemporal	P_3	spatial,SGBs
D124	SpatioTemporal	P_3	spatial,SGBs
D125	SpatioTemporal	P_3	spatial,SGBs
D126	SpatioTemporal	P_3	spatial,SGBs
D127	SpatioTemporal	P_5	spatial,SGBs
D128	SpatioTemporal	P_5	spatial,SGBs
D129	SpatioTemporal	P_5	spatial,SGBs
D13	SpatioTemporal	P_2	spatial,SGBs
D130	SpatioTemporal	P_5	spatial,SGBs
D131	SpatioTemporal	P_5	spatial,SGBs
D132	SpatioTemporal	P_5	spatial,SGBs
D133	SpatioTemporal	P_6	spatial,SGBs
D134	SpatioTemporal	P_6	spatial,SGBs
D135	SpatioTemporal	P_6	spatial,SGBs
D136	SpatioTemporal	P_6	spatial,SGBs
D137	SpatioTemporal	P_6	spatial,SGBs
D138	SpatioTemporal	P_6	spatial,SGBs
D139	SpatioTemporal	P_5	short-term,SGBs
D14	SpatioTemporal	P_2	spatial,SGBs
D140	SpatioTemporal	P_5	short-term,SGBs
D141	SpatioTemporal	P_5	short-term,SGBs
D142	SpatioTemporal	P_6	short-term,SGBs
D143	SpatioTemporal	P_6	short-term,SGBs
D144	SpatioTemporal	P_6	short-term,SGBs
D145	SpatioTemporal	P_1	short-term,SGBs
D146	SpatioTemporal	P_1	short-term,SGBs
D147	SpatioTemporal	P_1	short-term,SGBs
D148	SpatioTemporal	P_2	short-term,SGBs
D149	SpatioTemporal	P_2	short-term,SGBs
D15	SpatioTemporal	P_2	spatial,SGBs
D150	SpatioTemporal	P_2	short-term,SGBs
D151	SpatioTemporal	P_4	short-term,SGBs
D152	SpatioTemporal	P_4	short-term,SGBs
D153	SpatioTemporal	P_4	short-term,SGBs
D154	SpatioTemporal	P_3	short-term,SGBs
D155	SpatioTemporal	P_3	short-term,SGBs
D156	SpatioTemporal	P_3	short-term,SGBs
D16	SpatioTemporal	P_2	spatial,SGBs
D17	SpatioTemporal	P_2	spatial,SGBs
D18	SpatioTemporal	P_2	spatial,SGBs
D19	SpatioTemporal	P_2	spatial,SGBs
D2	SpatioTemporal	P_1	spatial,SGBs
D20	SpatioTemporal	P_2	spatial,SGBs
D21	SpatioTemporal	P_2	spatial,SGBs
D22	SpatioTemporal	P_2	spatial,SGBs
D23	SpatioTemporal	P_2	spatial,SGBs
D24	SpatioTemporal	P_2	spatial,SGBs
D25	SpatioTemporal	P_3	spatial,SGBs
D26	SpatioTemporal	P_3	spatial,SGBs
D27	SpatioTemporal	P_3	spatial,SGBs
D28	SpatioTemporal	P_3	spatial,SGBs
D29	SpatioTemporal	P_3	spatial,SGBs
D3	SpatioTemporal	P_1	spatial,SGBs
D30	SpatioTemporal	P_3	spatial,SGBs
D31	SpatioTemporal	P_3	spatial,SGBs
D32	SpatioTemporal	P_3	spatial,SGBs
D33	SpatioTemporal	P_3	spatial,SGBs
D34	SpatioTemporal	P_3	spatial,SGBs
D35	SpatioTemporal	P_3	spatial,SGBs
D36	SpatioTemporal	P_3	spatial,SGBs
D37	SpatioTemporal	P_4	spatial,SGBs
D38	SpatioTemporal	P_4	spatial,SGBs
D39	SpatioTemporal	P_4	spatial,SGBs
D4	SpatioTemporal	P_1	spatial,SGBs
D40	SpatioTemporal	P_4	spatial,SGBs
D41	SpatioTemporal	P_4	spatial,SGBs
D42	SpatioTemporal	P_4	spatial,SGBs
D43	SpatioTemporal	P_4	spatial,SGBs
D44	SpatioTemporal	P_4	spatial,SGBs
D45	SpatioTemporal	P_4	spatial,SGBs
D46	SpatioTemporal	P_4	spatial,SGBs
D47	SpatioTemporal	P_4	spatial,SGBs
D48	SpatioTemporal	P_4	spatial,SGBs
D49	SpatioTemporal	P_5	spatial,SGBs
D5	SpatioTemporal	P_1	spatial,SGBs
D50	SpatioTemporal	P_5	spatial,SGBs
D51	SpatioTemporal	P_5	spatial,SGBs
D52	SpatioTemporal	P_5	spatial,SGBs
D53	SpatioTemporal	P_5	spatial,SGBs
D54	SpatioTemporal	P_5	spatial,SGBs
D6	SpatioTemporal	P_1	spatial,SGBs
D61	SpatioTemporal	P_6	spatial,SGBs
D62	SpatioTemporal	P_6	spatial,SGBs
D63	SpatioTemporal	P_6	spatial,SGBs
D64	SpatioTemporal	P_6	spatial,SGBs
D65	SpatioTemporal	P_6	spatial,SGBs
D66	SpatioTemporal	P_6	spatial,SGBs
D67	SpatioTemporal	P_6	spatial,SGBs
D68	SpatioTemporal	P_6	spatial,SGBs
D69	SpatioTemporal	P_6	spatial,SGBs
D7	SpatioTemporal	P_1	spatial,SGBs
D70	SpatioTemporal	P_6	spatial,SGBs
D71	SpatioTemporal	P_6	spatial,SGBs
D72	SpatioTemporal	P_6	spatial,SGBs
D73	SpatioTemporal	P_1	spatial,SGBs
D74	SpatioTemporal	P_1	spatial,SGBs
D75	SpatioTemporal	P_1	spatial,SGBs
D76	SpatioTemporal	P_1	spatial,SGBs
D77	SpatioTemporal	P_1	spatial,SGBs
D78	SpatioTemporal	P_1	spatial,SGBs
D79	SpatioTemporal	P_6	spatial,SGBs
D8	SpatioTemporal	P_1	spatial,SGBs
D80	SpatioTemporal	P_6	spatial,SGBs
D81	SpatioTemporal	P_6	spatial,SGBs
D82	SpatioTemporal	P_6	spatial,SGBs
D83	SpatioTemporal	P_6	spatial,SGBs
D84	SpatioTemporal	P_6	spatial,SGBs
D85	SpatioTemporal	P_4	spatial,SGBs
D86	SpatioTemporal	P_4	spatial,SGBs
D87	SpatioTemporal	P_4	spatial,SGBs
D88	SpatioTemporal	P_4	spatial,SGBs
D89	SpatioTemporal	P_4	spatial,SGBs
D9	SpatioTemporal	P_1	spatial,SGBs
D90	SpatioTemporal	P_4	spatial,SGBs
D91	SpatioTemporal	P_5	spatial,SGBs
D92	SpatioTemporal	P_5	spatial,SGBs
D93	SpatioTemporal	P_5	spatial,SGBs
D94	SpatioTemporal	P_5	spatial,SGBs
D95	SpatioTemporal	P_5	spatial,SGBs
D96	SpatioTemporal	P_5	spatial,SGBs
D97	SpatioTemporal	P_3	spatial,SGBs
D98	SpatioTemporal	P_3	spatial,SGBs
D99	SpatioTemporal	P_3	spatial,SGBs
IA_114_1	Longitudinal	K_114	long-term,SGBs
IA_114_2	Longitudinal	K_114	long-term,SGBs
IA_139_2	Longitudinal	K_139	long-term,SGBs
IA_139_3	Longitudinal	K_139	long-term,SGBs
IA_197_1	Longitudinal	K_197	long-term,SGBs
IA_260_1	Longitudinal	K_260	long-term,SGBs
IR_261_1	Longitudinal	K_261	long-term,SGBs
MP_1	CrossSectional	H_41	cross_sectional,specimen_comparison,SGBs
MP_10	CrossSectional	H_76	cross_sectional,specimen_comparison,SGBs
MP_11	CrossSectional	H_77	cross_sectional,specimen_comparison,SGBs
MP_12	CrossSectional	H_78	cross_sectional,specimen_comparison,SGBs
MP_13	CrossSectional	H_149	cross_sectional,specimen_comparison,SGBs
MP_14	CrossSectional	H_80	cross_sectional,specimen_comparison,SGBs
MP_15	CrossSectional	H_81	cross_sectional,specimen_comparison,SGBs
MP_16	CrossSectional	H_82	cross_sectional,specimen_comparison,SGBs
MP_17	CrossSectional	H_83	cross_sectional,specimen_comparison,SGBs
MP_18	CrossSectional	H_84	cross_sectional,specimen_comparison,SGBs
MP_19	CrossSectional	H_33	cross_sectional,specimen_comparison,SGBs
MP_2	CrossSectional	H_42	cross_sectional,specimen_comparison,SGBs
MP_20	CrossSectional	H_34	cross_sectional,specimen_comparison,SGBs
MP_21	CrossSectional	H_35	cross_sectional,specimen_comparison,SGBs
MP_22	CrossSectional	H_36	cross_sectional,specimen_comparison,SGBs
MP_23	CrossSectional	H_37	cross_sectional,specimen_comparison,SGBs
MP_24	CrossSectional	H_38	cross_sectional,specimen_comparison,SGBs
MP_25	CrossSectional	H_39	cross_sectional,specimen_comparison,SGBs
MP_26	CrossSectional	H_30	cross_sectional,specimen_comparison,SGBs
MP_27	CrossSectional	H_20	cross_sectional,specimen_comparison,SGBs
MP_28	CrossSectional	H_21	cross_sectional,specimen_comparison,SGBs
MP_29	CrossSectional	H_22	cross_sectional,specimen_comparison,SGBs
MP_3	CrossSectional	H_44	cross_sectional,specimen_comparison,SGBs
MP_30	CrossSectional	H_24	cross_sectional,specimen_comparison,SGBs
MP_32	CrossSectional	H_29	cross_sectional,specimen_comparison,SGBs
MP_33	CrossSectional	H_16	cross_sectional,specimen_comparison,SGBs
MP_34	CrossSectional	H_17	cross_sectional,specimen_comparison,SGBs
MP_35	CrossSectional	H_56	cross_sectional,specimen_comparison,SGBs
MP_4	CrossSectional	H_45	cross_sectional,specimen_comparison,SGBs
MP_5	CrossSectional	H_46	cross_sectional,specimen_comparison,SGBs
MP_6	CrossSectional	H_71	cross_sectional,specimen_comparison,SGBs
MP_7	CrossSectional	H_72	cross_sectional,specimen_comparison,SGBs
MP_8	CrossSectional	H_73	cross_sectional,specimen_comparison,SGBs
MP_9	CrossSectional	H_75	cross_sectional,specimen_comparison,SGBs
MS_02	CrossSectional	H_42	cross_sectional,specimen_comparison,SGBs
MS_1	CrossSectional	H_41	cross_sectional,specimen_comparison,SGBs
MS_10	CrossSectional	H_76	cross_sectional,specimen_comparison,SGBs
MS_11	CrossSectional	H_77	cross_sectional,specimen_comparison,SGBs
MS_12	CrossSectional	H_78	cross_sectional,specimen_comparison,SGBs
MS_13	CrossSectional	H_149	cross_sectional,specimen_comparison,SGBs
MS_14	CrossSectional	H_80	cross_sectional,specimen_comparison,SGBs
MS_15	CrossSectional	H_81	cross_sectional,specimen_comparison,SGBs
MS_16	CrossSectional	H_82	cross_sectional,specimen_comparison,SGBs
MS_17	CrossSectional	H_83	cross_sectional,specimen_comparison,SGBs
MS_18	CrossSectional	H_84	cross_sectional,specimen_comparison,SGBs
MS_19	CrossSectional	H_33	cross_sectional,specimen_comparison,SGBs
MS_20	CrossSectional	H_34	cross_sectional,specimen_comparison,SGBs
MS_21	CrossSectional	H_35	cross_sectional,specimen_comparison,SGBs
MS_22	CrossSectional	H_36	cross_sectional,specimen_comparison,SGBs
MS_23	CrossSectional	H_37	cross_sectional,specimen_comparison,SGBs
MS_24	CrossSectional	H_38	cross_sectional,specimen_comparison,SGBs
MS_25	CrossSectional	H_39	cross_sectional,specimen_comparison,SGBs
MS_26	CrossSectional	H_30	cross_sectional,specimen_comparison,SGBs
MS_27	CrossSectional	H_20	cross_sectional,specimen_comparison,SGBs
MS_28	CrossSectional	H_21	cross_sectional,specimen_comparison,SGBs
MS_29	CrossSectional	H_22	cross_sectional,specimen_comparison,SGBs
MS_3	CrossSectional	H_44	cross_sectional,specimen_comparison,SGBs
MS_30	CrossSectional	H_24	cross_sectional,specimen_comparison,SGBs
MS_32	CrossSectional	H_29	cross_sectional,specimen_comparison,SGBs
MS_33	CrossSectional	H_16	cross_sectional,specimen_comparison,SGBs
MS_34	CrossSectional	H_17	cross_sectional,specimen_comparison,SGBs
MS_35	CrossSectional	H_56	cross_sectional,specimen_comparison,SGBs
MS_4	CrossSectional	H_45	cross_sectional,specimen_comparison,SGBs
MS_5	CrossSectional	H_46	cross_sectional,specimen_comparison,SGBs
MS_6	CrossSectional	H_71	cross_sectional,specimen_comparison,SGBs
MS_7	CrossSectional	H_72	cross_sectional,specimen_comparison,SGBs
MS_8	CrossSectional	H_73	cross_sectional,specimen_comparison,SGBs
MS_9	CrossSectional	H_75	cross_sectional,specimen_comparison,SGBs
SA_1_3_9_6	Longitudinal	K_1	long-term,SGBs
SA_113_2	Longitudinal	K_113	long-term,SGBs
SA_117_2	Longitudinal	K_117	long-term,SGBs
SA_157_1	Longitudinal	K_157	long-term,SGBs
SA_160_1	Longitudinal	K_160	long-term,SGBs
SA_161_2	Longitudinal	K_161	long-term,SGBs
SA_161_3	Longitudinal	K_161	long-term,SGBs
SA_170_1	Longitudinal	K_170	long-term,SGBs
SA_171_1	Longitudinal	K_171	long-term,SGBs
SA_171_2	Longitudinal	K_171	long-term,SGBs
SA_172_1	Longitudinal	K_172	long-term,SGBs
SA_177_3	Longitudinal	K_177	long-term,SGBs
SA_180_2	Longitudinal	K_180	long-term,SGBs
SA_180_3	Longitudinal	K_180	long-term,SGBs
SA_185_1	Longitudinal	K_185	long-term,SGBs
SA_186_1	Longitudinal	K_186	long-term,SGBs
SA_186_2	Longitudinal	K_186	long-term,SGBs
SA_187_1	Longitudinal	K_187	long-term,SGBs
SA_190_1	Longitudinal	K_190	long-term,SGBs
SA_190_2	Longitudinal	K_190	long-term,SGBs
SA_198_1	Longitudinal	K_198	long-term,SGBs
SA_198_2	Longitudinal	K_198	long-term,SGBs
SA_198_2_L	Longitudinal	K_198	SGBs
SA_198_2_U	Longitudinal	K_198	SGBs
SA_199_1	Longitudinal	K_199	long-term,SGBs
SA_199_2	Longitudinal	K_199	long-term,SGBs
SA_199_3	Longitudinal	K_199	long-term,SGBs
SA_2_2	Longitudinal	K_2	long-term,SGBs
SA_2_3	Longitudinal	K_2	long-term,SGBs
SA_205_1	Longitudinal	K_205	long-term,SGBs
SA_205_2	Longitudinal	K_205	long-term,SGBs
SA_205_3	Longitudinal	K_205	long-term,SGBs
SA_206_1	Longitudinal	K_206	long-term,SGBs
SA_206_2	Longitudinal	K_206	long-term,SGBs
SA_208_1	Longitudinal	K_208	long-term,SGBs
SA_208_2	Longitudinal	K_208	long-term,SGBs
SA_208_3	Longitudinal	K_208	long-term,SGBs
SA_209_1	Longitudinal	K_209	long-term,SGBs
SA_209_2	Longitudinal	K_209	long-term,SGBs
SA_209_3	Longitudinal	K_209	long-term,SGBs
SA_213_1	Longitudinal	K_213	long-term,SGBs
SA_214_1	Longitudinal	K_214	long-term,SGBs
SA_214_2	Longitudinal	K_214	long-term,SGBs
SA_214_3	Longitudinal	K_214	long-term,SGBs
SA_216_1	Longitudinal	K_216	long-term,SGBs
SA_217_1_L	Longitudinal	K_217	SGBs
SA_217_1_U	Longitudinal	K_217	long-term,SGBs
SA_217_2	Longitudinal	K_217	long-term,SGBs
SA_217_3	Longitudinal	K_217	long-term,SGBs
SA_223_1	Longitudinal	K_223	long-term,SGBs
SA_226_1	Longitudinal	K_226	long-term,SGBs
SA_226_2	Longitudinal	K_226	long-term,SGBs
SA_229_1	Longitudinal	K_229	long-term,SGBs
SA_229_2	Longitudinal	K_229	long-term,SGBs
SA_231_1	Longitudinal	K_231	long-term,SGBs
SA_231_2	Longitudinal	K_231	long-term,SGBs
SA_236_1	Longitudinal	K_236	long-term,SGBs
SA_240_1	Longitudinal	K_240	long-term,SGBs
SA_240_2	Longitudinal	K_240	long-term,SGBs
SA_242_1	Longitudinal	K_242	long-term,SGBs
SA_242_2	Longitudinal	K_242	long-term,SGBs
SA_242_3	Longitudinal	K_242	long-term,SGBs
SA_244_1	Longitudinal	K_244	long-term,SGBs
SA_246_1	Longitudinal	K_246	long-term,SGBs
SA_252_2	Longitudinal	K_252	long-term,SGBs
SA_259_1	Longitudinal	K_259	long-term,SGBs
SA_265_1	Longitudinal	K_265	long-term,SGBs
SA_265_2	Longitudinal	K_265	long-term,SGBs
SA_269_1	Longitudinal	K_269	long-term,SGBs
SA_298_1	Longitudinal	K_298	long-term,SGBs
SA_298_2	Longitudinal	K_298	long-term,SGBs
SA_298_3	Longitudinal	K_298	long-term,SGBs
SA_300_1	Longitudinal	K_300	long-term,SGBs
SA_300_3	Longitudinal	K_300	long-term,SGBs
SA_301_1	Longitudinal	K_301	long-term,SGBs
SA_301_2	Longitudinal	K_301	long-term,SGBs
SA_301_3	Longitudinal	K_301	long-term,SGBs
SA_40_2	Longitudinal	K_40	long-term,SGBs
SA_42_2	Longitudinal	K_42	long-term,SGBs
SA_42_3	Longitudinal	K_42	long-term,SGBs
SA_74_3	Longitudinal	K_74	long-term,SGBs
SA_97_2	Longitudinal	K_97	long-term,SGBs
SR_10_2	Longitudinal	K_10	long-term,SGBs
SR_10_3	Longitudinal	K_10	long-term,SGBs
SR_101_2	Longitudinal	K_101	long-term,SGBs
SR_101_3	Longitudinal	K_101	long-term,SGBs
SR_106_3	Longitudinal	K_106	long-term,SGBs
SR_110_1	Longitudinal	K_110	long-term,SGBs
SR_110_2	Longitudinal	K_110	long-term,SGBs
SR_112_2	Longitudinal	K_112	long-term,SGBs
SR_115_2	Longitudinal	K_115	long-term,SGBs
SR_116_1	Longitudinal	K_116	long-term,SGBs
SR_116_2	Longitudinal	K_116	long-term,SGBs
SR_116_3	Longitudinal	K_116	long-term,SGBs
SR_117_1	Longitudinal	K_117	long-term,SGBs
SR_118_2	Longitudinal	K_118	long-term,SGBs
SR_119_1	Longitudinal	K_119	long-term,SGBs
SR_119_2	Longitudinal	K_119	long-term,SGBs
SR_119_3	Longitudinal	K_119	long-term,SGBs
SR_12_2	Longitudinal	K_12	long-term,SGBs
SR_12_3	Longitudinal	K_12	long-term,SGBs
SR_121_2	Longitudinal	K_121	long-term,SGBs
SR_121_3	Longitudinal	K_121	long-term,SGBs
SR_122_1	Longitudinal	K_122	long-term,SGBs
SR_122_2	Longitudinal	K_122	long-term,SGBs
SR_122_3	Longitudinal	K_122	long-term,SGBs
SR_125_1	Longitudinal	K_125	long-term,SGBs
SR_125_2	Longitudinal	K_125	long-term,SGBs
SR_127_1	Longitudinal	K_127	long-term,SGBs
SR_128_2	Longitudinal	K_128	long-term,SGBs
SR_129_2	Longitudinal	K_129	long-term,SGBs
SR_129_3	Longitudinal	K_129	long-term,SGBs
SR_131_1	Longitudinal	K_131	long-term,SGBs
SR_131_2	Longitudinal	K_131	long-term,SGBs
SR_131_3	Longitudinal	K_131	long-term,SGBs
SR_132_1	Longitudinal	K_132	long-term,SGBs
SR_132_2	Longitudinal	K_132	long-term,SGBs
SR_135_2	Longitudinal	K_135	long-term,SGBs
SR_136_1	Longitudinal	K_136	long-term,SGBs
SR_136_2	Longitudinal	K_136	long-term,SGBs
SR_136_3	Longitudinal	K_136	long-term,SGBs
SR_137_1	Longitudinal	K_137	long-term,SGBs
SR_137_2	Longitudinal	K_137	long-term,SGBs
SR_138_1	Longitudinal	K_138	long-term,SGBs
SR_138_2	Longitudinal	K_138	long-term,SGBs
SR_138_3	Longitudinal	K_138	long-term,SGBs
SR_140_1	Longitudinal	K_140	long-term,SGBs
SR_140_2	Longitudinal	K_140	long-term,SGBs
SR_140_3	Longitudinal	K_140	long-term,SGBs
SR_141_2	Longitudinal	K_141	long-term,SGBs
SR_141_3	Longitudinal	K_141	long-term,SGBs
SR_142_2	Longitudinal	K_142	long-term,SGBs
SR_143_2	Longitudinal	K_143	long-term,SGBs
SR_145_2	Longitudinal	K_145	long-term,SGBs
SR_145_3	Longitudinal	K_145	long-term,SGBs
SR_146_2	Longitudinal	K_146	long-term,SGBs
SR_147_2	Longitudinal	K_147	long-term,SGBs
SR_147_3	Longitudinal	K_147	long-term,SGBs
SR_148_2	Longitudinal	K_148	long-term,SGBs
SR_148_3	Longitudinal	K_148	long-term,SGBs
SR_149_2	Longitudinal	K_149	long-term,SGBs
SR_149_3	Longitudinal	K_149	long-term,SGBs
SR_150_1	Longitudinal	K_150	long-term,SGBs
SR_150_2	Longitudinal	K_150	long-term,SGBs
SR_150_3	Longitudinal	K_150	long-term,SGBs
SR_151_2	Longitudinal	K_151	long-term,SGBs
SR_151_3	Longitudinal	K_151	long-term,SGBs
SR_152_2	Longitudinal	K_152	long-term,SGBs
SR_153_3	Longitudinal	K_153	long-term,SGBs
SR_154_2	Longitudinal	K_154	long-term,SGBs
SR_154_3	Longitudinal	K_154	long-term,SGBs
SR_155_2	Longitudinal	K_155	long-term,SGBs
SR_155_3	Longitudinal	K_155	long-term,SGBs
SR_156_1	Longitudinal	K_156	long-term,SGBs
SR_158_1	Longitudinal	K_158	long-term,SGBs
SR_159_1	Longitudinal	K_159	long-term,SGBs
SR_16_2	Longitudinal	K_16	long-term,SGBs
SR_162_1	Longitudinal	K_162	long-term,SGBs
SR_162_2	Longitudinal	K_162	long-term,SGBs
SR_162_3	Longitudinal	K_162	long-term,SGBs
SR_166_1	Longitudinal	K_166	long-term,SGBs
SR_166_2	Longitudinal	K_166	long-term,SGBs
SR_167_2	Longitudinal	K_167	long-term,SGBs
SR_167_3	Longitudinal	K_167	long-term,SGBs
SR_168_1	Longitudinal	K_168	long-term,SGBs
SR_17_2	Longitudinal	K_17	long-term,SGBs
SR_176_2	Longitudinal	K_176	long-term,SGBs
SR_176_3	Longitudinal	K_176	long-term,SGBs
SR_181_1	Longitudinal	K_181	long-term,SGBs
SR_181_2	Longitudinal	K_181	long-term,SGBs
SR_182_1	Longitudinal	K_182	long-term,SGBs
SR_182_2	Longitudinal	K_182	long-term,SGBs
SR_182_3	Longitudinal	K_182	long-term,SGBs
SR_183_1	Longitudinal	K_183	long-term,SGBs
SR_183_2	Longitudinal	K_183	long-term,SGBs
SR_185_2	Longitudinal	K_185	long-term,SGBs
SR_19_2	Longitudinal	K_19	long-term,SGBs
SR_19_3	Longitudinal	K_19	long-term,SGBs
SR_191_1	Longitudinal	K_191	long-term,SGBs
SR_193_1	Longitudinal	K_193	long-term,SGBs
SR_193_2	Longitudinal	K_193	long-term,SGBs
SR_194_1	Longitudinal	K_194	long-term,SGBs
SR_194_2	Longitudinal	K_194	long-term,SGBs
SR_195_1	Longitudinal	K_195	long-term,SGBs
SR_195_2	Longitudinal	K_195	long-term,SGBs
SR_195_3	Longitudinal	K_195	long-term,SGBs
SR_196_1	Longitudinal	K_196	long-term,SGBs
SR_20_2	Longitudinal	K_20	long-term,SGBs
SR_200_1	Longitudinal	K_200	long-term,SGBs
SR_201_1	Longitudinal	K_201	long-term,SGBs
SR_201_2	Longitudinal	K_201	long-term,SGBs
SR_202_1	Longitudinal	K_202	long-term,SGBs
SR_203_1	Longitudinal	K_203	long-term,SGBs
SR_207_1	Longitudinal	K_207	long-term,SGBs
SR_207_2	Longitudinal	K_207	long-term,SGBs
SR_207_3	Longitudinal	K_207	long-term,SGBs
SR_21_1	Longitudinal	K_21	long-term,SGBs
SR_210_1	Longitudinal	K_210	long-term,SGBs
SR_210_2	Longitudinal	K_210	long-term,SGBs
SR_211_1	Longitudinal	K_211	long-term,SGBs
SR_212_2	Longitudinal	K_212	long-term,SGBs
SR_215_1	Longitudinal	K_215	long-term,SGBs
SR_218_1	Longitudinal	K_218	long-term,SGBs
SR_218_2	Longitudinal	K_218	long-term,SGBs
SR_218_3	Longitudinal	K_218	long-term,SGBs
SR_219_1	Longitudinal	K_219	long-term,SGBs
SR_219_3	Longitudinal	K_219	long-term,SGBs
SR_22_2	Longitudinal	K_22	long-term,SGBs
SR_224_1	Longitudinal	K_224	long-term,SGBs
SR_224_2	Longitudinal	K_224	long-term,SGBs
SR_224_3	Longitudinal	K_224	long-term,SGBs
SR_225_1	Longitudinal	K_225	long-term,SGBs
SR_225_2	Longitudinal	K_225	long-term,SGBs
SR_225_3	Longitudinal	K_225	long-term,SGBs
SR_227_1	Longitudinal	K_227	long-term,SGBs
SR_227_2	Longitudinal	K_227	long-term,SGBs
SR_228_1	Longitudinal	K_228	long-term,SGBs
SR_228_2	Longitudinal	K_228	long-term,SGBs
SR_23_2	Longitudinal	K_23	long-term,SGBs
SR_23_3	Longitudinal	K_23	long-term,SGBs
SR_230_1	Longitudinal	K_230	long-term,SGBs
SR_230_2	Longitudinal	K_230	long-term,SGBs
SR_230_3	Longitudinal	K_230	long-term,SGBs
SR_232_1	Longitudinal	K_232	long-term,SGBs
SR_233_1	Longitudinal	K_233	long-term,SGBs
SR_234_1	Longitudinal	K_234	long-term,SGBs
SR_235_1	Longitudinal	K_235	long-term,SGBs
SR_235_2	Longitudinal	K_235	long-term,SGBs
SR_237_1	Longitudinal	K_237	long-term,SGBs
SR_237_2	Longitudinal	K_237	long-term,SGBs
SR_237_3	Longitudinal	K_237	long-term,SGBs
SR_239_1	Longitudinal	K_239	long-term,SGBs
SR_239_3	Longitudinal	K_239	long-term,SGBs
SR_241_1	Longitudinal	K_241	long-term,SGBs
SR_252_1	Longitudinal	K_252	long-term,SGBs
SR_252_3	Longitudinal	K_252	long-term,SGBs
SR_252_3_2	Longitudinal	K_252	SGBs
SR_254_1	Longitudinal	K_254	long-term,SGBs
SR_254_2	Longitudinal	K_254	long-term,SGBs
SR_254_3	Longitudinal	K_254	long-term,SGBs
SR_255_1	Longitudinal	K_255	long-term,SGBs
SR_256_1	Longitudinal	K_256	long-term,SGBs
SR_256_2	Longitudinal	K_256	long-term,SGBs
SR_256_3	Longitudinal	K_256	long-term,SGBs
SR_258_1	Longitudinal	K_258	long-term,SGBs
SR_258_2	Longitudinal	K_258	long-term,SGBs
SR_258_3	Longitudinal	K_258	long-term,SGBs
SR_26_2	Longitudinal	K_26	long-term,SGBs
SR_260_2	Longitudinal	K_260	long-term,SGBs
SR_260_3	Longitudinal	K_260	long-term,SGBs
SR_262_1	Longitudinal	K_262	long-term,SGBs
SR_262_2	Longitudinal	K_262	long-term,SGBs
SR_262_3	Longitudinal	K_262	long-term,SGBs
SR_263_1	Longitudinal	K_263	long-term,SGBs
SR_263_2	Longitudinal	K_263	long-term,SGBs
SR_263_3	Longitudinal	K_263	long-term,SGBs
SR_264_1	Longitudinal	K_264	long-term,SGBs
SR_266_1	Longitudinal	K_266	long-term,SGBs
SR_267_1	Longitudinal	K_267	long-term,SGBs
SR_267_2	Longitudinal	K_267	long-term,SGBs
SR_267_3	Longitudinal	K_267	long-term,SGBs
SR_269_2	Longitudinal	K_269	long-term,SGBs
SR_270_2	Longitudinal	K_270	long-term,SGBs
SR_270_3	Longitudinal	K_270	long-term,SGBs
SR_272_1	Longitudinal	K_272	long-term,SGBs
SR_272_2	Longitudinal	K_272	long-term,SGBs
SR_275_1	Longitudinal	K_275	long-term,SGBs
SR_275_2	Longitudinal	K_275	long-term,SGBs
SR_28_2	Longitudinal	K_28	long-term,SGBs
SR_280_1	Longitudinal	K_280	long-term,SGBs
SR_280_2	Longitudinal	K_280	long-term,SGBs
SR_280_3	Longitudinal	K_280	long-term,SGBs
SR_281_1	Longitudinal	K_281	long-term,SGBs
SR_281_2	Longitudinal	K_281	long-term,SGBs
SR_29_2	Longitudinal	K_29	long-term,SGBs
SR_29_3	Longitudinal	K_29	long-term,SGBs
SR_299_1	Longitudinal	K_299	long-term,SGBs
SR_299_2	Longitudinal	K_299	long-term,SGBs
SR_299_3	Longitudinal	K_299	long-term,SGBs
SR_3_2	Longitudinal	K_3	long-term,SGBs
SR_30_2	Longitudinal	K_30	long-term,SGBs
SR_30_3	Longitudinal	K_30	long-term,SGBs
SR_302_1	Longitudinal	K_302	long-term,SGBs
SR_302_2	Longitudinal	K_302	long-term,SGBs
SR_31_2	Longitudinal	K_31	long-term,SGBs
SR_33_2	Longitudinal	K_33	long-term,SGBs
SR_34_2	Longitudinal	K_34	long-term,SGBs
SR_34_3	Longitudinal	K_34	long-term,SGBs
SR_35_2	Longitudinal	K_35	long-term,SGBs
SR_38_3	Longitudinal	K_38	long-term,SGBs
SR_382_2	Longitudinal	K_382	long-term,SGBs
SR_39_2	Longitudinal	K_39	long-term,SGBs
SR_41_1	Longitudinal	K_41	long-term,SGBs
SR_41_3	Longitudinal	K_41	long-term,SGBs
SR_43_2	Longitudinal	K_43	long-term,SGBs
SR_43_3	Longitudinal	K_43	long-term,SGBs
SR_45_2	Longitudinal	K_45	long-term,SGBs
SR_46_2	Longitudinal	K_46	long-term,SGBs
SR_46_3	Longitudinal	K_46	long-term,SGBs
SR_47_2	Longitudinal	K_47	long-term,SGBs
SR_47_3	Longitudinal	K_47	long-term,SGBs
SR_48_2	Longitudinal	K_48	long-term,SGBs
SR_48_3	Longitudinal	K_48	long-term,SGBs
SR_5_2	Longitudinal	K_5	long-term,SGBs
SR_5_3	Longitudinal	K_5	long-term,SGBs
SR_54_1	Longitudinal	K_54	long-term,SGBs
SR_55_2	Longitudinal	K_55	long-term,SGBs
SR_56_2	Longitudinal	K_56	long-term,SGBs
SR_57_2	Longitudinal	K_57	long-term,SGBs
SR_57_3	Longitudinal	K_57	long-term,SGBs
SR_59_2	Longitudinal	K_59	long-term,SGBs
SR_6_2_L	Longitudinal	K_6	long-term,SGBs
SR_6_2_U	Longitudinal	K_6	long-term,SGBs
SR_6_3	Longitudinal	K_6	long-term,SGBs
SR_60_2	Longitudinal	K_60	long-term,SGBs
SR_60_3	Longitudinal	K_60	long-term,SGBs
SR_62_2	Longitudinal	K_62	long-term,SGBs
SR_62_3	Longitudinal	K_62	long-term,SGBs
SR_64_2	Longitudinal	K_64	long-term,SGBs
SR_64_3	Longitudinal	K_64	long-term,SGBs
SR_65_2	Longitudinal	K_65	long-term,SGBs
SR_67_2	Longitudinal	K_67	long-term,SGBs
SR_67_3	Longitudinal	K_67	long-term,SGBs
SR_68_2	Longitudinal	K_68	long-term,SGBs
SR_70_2	Longitudinal	K_70	long-term,SGBs
SR_70_3	Longitudinal	K_70	long-term,SGBs
SR_71_2	Longitudinal	K_71	long-term,SGBs
SR_72_2	Longitudinal	K_72	long-term,SGBs
SR_72_3	Longitudinal	K_72	long-term,SGBs
SR_73_2	Longitudinal	K_73	long-term,SGBs
SR_74_2	Longitudinal	K_74	long-term,SGBs
SR_75_2	Longitudinal	K_75	long-term,SGBs
SR_75_3	Longitudinal	K_75	long-term,SGBs
SR_76_2	Longitudinal	K_76	long-term,SGBs
SR_76_3	Longitudinal	K_76	long-term,SGBs
SR_77_2	Longitudinal	K_77	long-term,SGBs
SR_78_2	Longitudinal	K_78	long-term,SGBs
SR_78_3	Longitudinal	K_78	long-term,SGBs
SR_79_3	Longitudinal	K_79	long-term,SGBs
SR_8_2	Longitudinal	K_8	long-term,SGBs
SR_80_2	Longitudinal	K_80	long-term,SGBs
SR_80_3	Longitudinal	K_80	long-term,SGBs
SR_800_2	Longitudinal	K_800	long-term,SGBs
SR_81_2	Longitudinal	K_81	long-term,SGBs
SR_81_3	Longitudinal	K_81	long-term,SGBs
SR_82_2	Longitudinal	K_82	long-term,SGBs
SR_83_2	Longitudinal	K_83	long-term,SGBs
SR_83_3	Longitudinal	K_83	long-term,SGBs
SR_84_2	Longitudinal	K_84	long-term,SGBs
SR_85_2	Longitudinal	K_85	long-term,SGBs
SR_85_3	Longitudinal	K_85	long-term,SGBs
SR_86_2	Longitudinal	K_86	long-term,SGBs
SR_87_2	Longitudinal	K_87	long-term,SGBs
SR_88_2	Longitudinal	K_88	long-term,SGBs
SR_89_1	Longitudinal	K_89	long-term,SGBs
SR_89_2	Longitudinal	K_89	long-term,SGBs
SR_89_3	Longitudinal	K_89	long-term,SGBs
SR_95_2	Longitudinal	K_95	long-term,SGBs
SR_95_3	Longitudinal	K_95	long-term,SGBs
SR_98_2	Longitudinal	K_98	long-term,SGBs
SR_98_3	Longitudinal	K_98	long-term,SGBs

## Sheet: SupplementaryTable8
user_genome	closest_genome_reference	closest_genome_ani	closest_genome_source	label	sample_id	Completeness	Contamination	Completeness_Model_Used	Translation_Table_Used	Coding_Density	Contig_N50	Average_Gene_Length	Genome_Size	GC_Content	Total_Coding_Sequences	Total_Contigs	Max_Contig_Length	Additional_Notes	Completeness_metric	genome_quality	domain	phylum	class	order	family	genus	species	specimen
AB1000_Plaque.11	GCF_916618745.1	960	GTDB	known	AB1000_Plaque	73.36	3.46	Gradient Boost (General Model)	11	893	9448	2.81928e+16	1683778	59	1781	257	30566	None	substantial	MQ	d__Bacteria	p__Pseudomonadota	c__Gammaproteobacteria	o__Cardiobacteriales	f__Cardiobacteriaceae	g__Cardiobacterium	Cardiobacterium sp916618745	Plaque
AB1000_Saliva.1	AB1000_Saliva.23	999971	Schmartz_2024	known	AB1000_Saliva	68.52	1.26	Neural Network (Specific Model)	11	91	3454	2.58411e+16	1591501	59	1872	494	11074	None	moderate	MQ	d__Bacteria	p__Bacillota_C	c__Negativicutes	o__Selenomonadales	f__Selenomonadaceae	g__Selenomonas	Selenomonas sputigena	Saliva
AB1000_Saliva.15	AB1000_Saliva.30	999465	Schmartz_2024	known	AB1000_Saliva	68.18	0.58	Neural Network (Specific Model)	11	922	3705	2.37247e+16	1280533	4	1665	377	16473	None	moderate	MQ	d__Bacteria	p__Campylobacterota	c__Campylobacteria	o__Campylobacterales	f__Campylobacteraceae	g__Campylobacter_A	Campylobacter_A concisus_AB	Saliva
AB1000_Saliva.25	AB1000_Saliva.11	100	Schmartz_2024	known	AB1000_Saliva	99.74	0.21	Neural Network (Specific Model)	11	914	424418	3.01342e+16	721566	43	731	4	424418	None	near	HQ	d__Bacteria	p__Patescibacteria	c__Saccharimonadia	o__Saccharimonadales	f__Nanosynbacteraceae	g__Nanosynbacter		Saliva
AB1000_Saliva.41	MGYG000004591	972459	UHGG	known	AB1000_Saliva	65.42	4.52	Gradient Boost (General Model)	11	917	3389	261228855721393	1027997	37	1206	329	14513	None	moderate	MQ	d__Bacteria	p__Bacillota_I	c__Bacilli_A	o__Erysipelotrichales	f__Erysipelotrichaceae	g__Bulleidia	Bulleidia sp015256775	Saliva
AB1000_Saliva.63	GCA_019425105.1	9733	GTDB	known	AB1000_Saliva	54.36	1.33	Neural Network (Specific Model)	11	893	11421	3.20686e+16	1401739	65	1304	175	64149	None	moderate	MQ	d__Bacteria	p__Actinomycetota	c__Actinomycetes	o__Actinomycetales	f__Actinomycetaceae	g__Pauljensenia	Pauljensenia sp019425105	Saliva
AB1000_Saliva.9	GCF_016651435.1	9676	GTDB	known	AB1000_Saliva	69.05	1.67	Gradient Boost (General Model)	11	896	4153	2.70832e+16	1715481	4	1897	463	22317	None	moderate	MQ	d__Bacteria	p__Bacillota_A	c__Clostridia	o__Lachnospirales	f__Lachnospiraceae	g__Catonella	Catonella massiliensis	Saliva
AB1001_Plaque.25	GCF_000187465.1	9572	GTDB	known	AB1001_Plaque	53.9	3.11	Neural Network (Specific Model)	11	892	4110	2.54262e+16	1255385	39	1472	344	27073	None	moderate	MQ	d__Bacteria	p__Bacillota	c__Bacilli	o__Lactobacillales	f__Streptococcaceae	g__Streptococcus	Streptococcus infantis	Plaque
AB1001_Plaque.37	AB1001_Plaque.15	999976	Schmartz_2024	known	AB1001_Plaque	84.98	0.92	Neural Network (Specific Model)	11	841	6232	2606362699639361	1798782	48	1941	355	41314	None	substantial	MQ	d__Bacteria	p__Campylobacterota	c__Campylobacteria	o__Campylobacterales	f__Campylobacteraceae	g__Campylobacter_B		Plaque
AB1001_Plaque.42	GCF_900113545.1	965	GTDB	known	AB1001_Plaque	62.73	2.29	Neural Network (Specific Model)	11	847	5531	2.41113e+16	1509650	56	1771	322	52645	None	moderate	MQ	d__Bacteria	p__Pseudomonadota	c__Gammaproteobacteria	o__Burkholderiales	f__Neisseriaceae	g__Neisseria	Neisseria elongata	Plaque
AB1001_Plaque.43	GCF_000148585.2	9581	GTDB	known	AB1001_Plaque	69.85	0.16	Neural Network (Specific Model)	11	901	165913	3091264728986646	1307226	4	1273	27	331977	None	moderate	MQ	d__Bacteria	p__Bacillota	c__Bacilli	o__Lactobacillales	f__Streptococcaceae	g__Streptococcus	Streptococcus mitis	Plaque
AB1001_Saliva.34	GCA_916049765.1	978	GTDB	known	AB1001_Saliva	91.41	0.32	Neural Network (Specific Model)	4	877	184492	3117210144927536	881706	35	828	7	375659	None	near	HQ	d__Bacteria	p__Patescibacteria	c__JAEDAM01	o__Absconditabacterales	f__Absconditicoccaceae	g__HOT-345	HOT-345 sp916049765	Saliva
AB1001_Saliva.52	FerrettiP_2018__CA_C10002MS2015SA_t0M15__bin_26	969599	Pasolli_2019	known	AB1001_Saliva	77.24	0.6	Neural Network (Specific Model)	11	909	4808	2.48657e+16	523144	36	639	127	16615	None	substantial	MQ	d__Bacteria	p__Patescibacteria	c__Saccharimonadia	o__Saccharimonadales	f__Nanogingivalaceae	g__Nanogingivalis	Nanogingivalis sp015257795	Saliva
AB1001_Saliva.57	GCF_014202695.1	9633	GTDB	known	AB1001_Saliva	60.93	0.14	Gradient Boost (General Model)	11	876	3547	268205317577548	1241680	44	1354	385	18338	None	moderate	MQ	d__Bacteria	p__Bacillota_A	c__Clostridia	o__Lachnospirales	f__Lachnospiraceae	g__Oribacterium	Oribacterium sinus	Saliva
AB1003_Saliva.1	AB1003_Saliva.7	999168	Schmartz_2024	known	AB1003_Saliva	53.98	0.04	Neural Network (Specific Model)	11	889	3064	2.43802e+16	1034875	4	1260	356	10504	None	moderate	MQ	d__Bacteria	p__Pseudomonadota	c__Gammaproteobacteria	o__Enterobacterales	f__Pasteurellaceae	g__Haemophilus_D	Haemophilus_D sp927911595	Saliva
AB1003_Saliva.18	GCF_030644365.1	9891	GTDB	known	AB1003_Saliva	99.89	0.21	Neural Network (Specific Model)	11	878	86941	3.52784e+16	2431912	67	2019	54	208028	None	near	HQ	d__Bacteria	p__Actinomycetota	c__Actinomycetes	o__Actinomycetales	f__Actinomycetaceae	g__Pauljensenia	Pauljensenia sp000466265	Saliva
AB1003_Saliva.19	HMP_2012__SRS018300__bin_49	973503	Pasolli_2019	known	AB1003_Saliva	66.45	0.1	Neural Network (Specific Model)	11	91	6493	3.0951e+16	959907	43	942	193	27105	None	moderate	MQ	d__Bacteria	p__Bacillota_A	c__Clostridia	o__Peptostreptococcales	f__Anaerovoracaceae	g__Mogibacterium	Mogibacterium diversum	Saliva
AB1003_Saliva.9	GCF_013393365.1	9735	GTDB	known	AB1003_Saliva	67.7	0.65	Neural Network (Specific Model)	11	885	4634	2812134831460674	1270268	39	1335	295	37720	None	moderate	MQ	d__Bacteria	p__Bacillota_C	c__Negativicutes	o__Veillonellales	f__Veillonellaceae	g__Veillonella	Veillonella nakazawae	Saliva
AB1004_Plaque.26	AB1797_Plaque.1	992556	Schmartz_2024	known	AB1004_Plaque	57.18	0.93	Neural Network (Specific Model)	11	92	4342	2.76263e+16	1052411	5	1172	270	13020	None	moderate	MQ	d__Bacteria	p__Bacillota_A	c__Clostridia	o__Peptostreptococcales	f__Anaerovoracaceae	g__Eubacterium_B	Eubacterium_B sp938046095	Plaque
AB1004_Plaque.42	A0022_Plaque.20	984108	Schmartz_2024	known	AB1004_Plaque	99.98	0.13	Neural Network (Specific Model)	11	887	52265	3.28024e+16	3271002	66	2956	129	238186	None	near	HQ	d__Bacteria	p__Actinomycetota	c__Actinomycetes	o__Propionibacteriales	f__Propionibacteriaceae	g__Arachnia	Arachnia propionica	Plaque
AB1004_Plaque.51	GCF_031191205.1	963	GTDB	known	AB1004_Plaque	58.03	4.91	Neural Network (Specific Model)	11	884	3507	2506905710491368	1280141	39	1506	398	11759	None	moderate	MQ	d__Bacteria	p__Pseudomonadota	c__Gammaproteobacteria	o__Enterobacterales	f__Pasteurellaceae	g__Haemophilus_D	Haemophilus_D parainfluenzae	Plaque
AB1004_Plaque.63	AB1004_Plaque.6	999998	Schmartz_2024	known	AB1004_Plaque	67.13	1.14	Neural Network (Specific Model)	11	9	5404	3.10023e+16	1274955	49	1235	275	20977	None	moderate	MQ	d__Bacteria	p__Bacteroidota	c__Bacteroidia	o__Bacteroidales	f__Porphyromonadaceae	g__Porphyromonas	Porphyromonas endodontalis	Plaque
AB1004_Plaque.71	AB1049_Plaque.46	954361	Schmartz_2024	known	AB1004_Plaque	93.68	0.62	Neural Network (Specific Model)	11	914	151624	2.94166e+16	865908	48	899	12	230266	None	near	HQ	d__Bacteria	p__Patescibacteria	c__Saccharimonadia	o__Saccharimonadales	f__Saccharimonadaceae	g__Saccharimonas	Saccharimonas sp905372095	Plaque
AB1004_Saliva.10	AB1004_Saliva.26	999864	Schmartz_2024	known	AB1004_Saliva	67.84	1.69	Neural Network (Specific Model)	11	895	3827	2724865637507147	1593789	62	1749	464	14861	None	moderate	MQ	d__Bacteria	p__Desulfobacterota	c__Desulfobulbia	o__Desulfobulbales	f__Desulfobulbaceae	g__Desulfobulbus	Desulfobulbus oralis	Saliva
AB1004_Saliva.20	GCF_000175615.1	9597	GTDB	known	AB1004_Saliva	55.75	0.04	Neural Network (Specific Model)	11	834	22239	3404032258064516	1137443	6	930	87	58442	None	moderate	MQ	d__Bacteria	p__Actinomycetota	c__Actinomycetes	o__Actinomycetales	f__Micrococcaceae	g__Rothia	Rothia mucilaginosa	Saliva
AB1004_Saliva.37	AB1415_Throat.4	994389	Schmartz_2024	known	AB1004_Saliva	83.81	0.06	Neural Network (Specific Model)	11	873	38108	3086112073945696	1834666	5	1731	66	116892	None	substantial	MQ	d__Bacteria	p__Pseudomonadota	c__Gammaproteobacteria	o__Burkholderiales	f__Neisseriaceae	g__Neisseria	Neisseria sp000186165	Saliva
AB1004_Saliva.7	GCF_015265235.1	9725	GTDB	known	AB1004_Saliva	83.18	0.05	Neural Network (Specific Model)	11	908	22578	3.20166e+16	1877135	59	1778	130	59565	None	substantial	MQ	d__Bacteria	p__Bacillota_C	c__Negativicutes	o__Selenomonadales	f__Selenomonadaceae	g__Centipeda	Centipeda sp015265235	Saliva
AB1005_Plaque.1	GCF_000210715.1	9885	GTDB	known	AB1005_Plaque	58.73	1.25	Gradient Boost (General Model)	11	898	3009	2685013605442177	1315440	66	1470	457	9105	None	moderate	MQ	d__Bacteria	p__Synergistota	c__Synergistia	o__Synergistales	f__Aminobacteriaceae	g__Fretibacterium	Fretibacterium fastidiosum	Plaque
AB1005_Plaque.26	AB1005_Plaque.32	999959	Schmartz_2024	known	AB1005_Plaque	69.04	1.41	Gradient Boost (General Model)	11	845	4175	2.55208e+16	1533534	57	1696	416	13377	None	moderate	MQ	d__Bacteria	p__Pseudomonadota	c__Gammaproteobacteria	o__Burkholderiales	f__Burkholderiaceae	g__Brachymonas		Plaque
AB1005_Plaque.36	AB1686_Forehead.3	973494	Schmartz_2024	known	AB1005_Plaque	97.67	0.58	Neural Network (Specific Model)	11	832	86610	3.18729e+16	2763271	62	2409	48	193999	None	near	HQ	d__Bacteria	p__Actinomycetota	c__Coriobacteriia	o__Coriobacteriales	f__Atopobiaceae	g__Olsenella_F	Olsenella_F sp001189515	Plaque
AB1005_Plaque.43	GCF_000413475.1	9853	GTDB	known	AB1005_Plaque	100	0.23	Neural Network (Specific Model)	11	882	461777	3.08588e+16	1882243	38	1797	11	613060	None	perfect	HQ	d__Bacteria	p__Bacillota	c__Bacilli	o__Lactobacillales	f__Streptococcaceae	g__Streptococcus	Streptococcus intermedius	Plaque
AB1005_Saliva.15	AB1059_Plaque.23	991174	Schmartz_2024	known	AB1005_Saliva	64.59	1.65	Neural Network (Specific Model)	11	929	5635	2.65084e+16	516790	52	606	105	18425	None	moderate	MQ	d__Bacteria	p__Patescibacteria	c__Saccharimonadia	o__Saccharimonadales	f__Nanosynbacteraceae	g__Nanosynbacter		Saliva
AB1006_Plaque.13	AB1305_Saliva.5	982607	Schmartz_2024	known	AB1006_Plaque	100	0.09	Neural Network (Specific Model)	11	893	88235	3.48021e+16	2339087	67	2004	43	177850	None	perfect	HQ	d__Bacteria	p__Actinomycetota	c__Actinomycetes	o__Actinomycetales	f__Actinomycetaceae	g__Pauljensenia	Pauljensenia sp000185285	Plaque
AB1006_Plaque.3	GCF_001274535.1	9805	GTDB	known	AB1006_Plaque	62.31	1.84	Neural Network (Specific Model)	11	894	7748	2.73245e+16	1291961	32	1411	240	34737	None	moderate	MQ	d__Bacteria	p__Fusobacteriota	c__Fusobacteriia	o__Fusobacteriales	f__Leptotrichiaceae	g__Leptotrichia_A	Leptotrichia_A sp001274535	Plaque
AB1006_Plaque.36	AB1121_Plaque.4	976632	Schmartz_2024	known	AB1006_Plaque	76.52	1.09	Neural Network (Specific Model)	11	906	6917	2.90201e+16	1666568	58	1738	313	25814	None	substantial	MQ	d__Bacteria	p__Bacillota_C	c__Negativicutes	o__Selenomonadales	f__Selenomonadaceae	g__Selenomonas	Selenomonas sp905372355	Plaque
AB1006_Plaque.38	AB1006_Plaque.3	999201	Schmartz_2024	known	AB1006_Plaque	73.14	0.61	Neural Network (Specific Model)	11	803	8876	2723996259351621	1628277	48	1604	243	29577	None	substantial	MQ	d__Bacteria	p__Campylobacterota	c__Campylobacteria	o__Campylobacterales	f__Campylobacteraceae	g__Campylobacter_B		Plaque
AB1006_Plaque.7	BI052_Plaque.41	953441	Schmartz_2024	known	AB1006_Plaque	93.94	0.4	Neural Network (Specific Model)	11	907	480487	3.03567e+16	895200	47	894	2	480487	None	near	HQ	d__Bacteria	p__Patescibacteria	c__Saccharimonadia	o__Saccharimonadales	f__Saccharimonadaceae	g__Saccharimonas		Plaque
AB1006_Saliva.26	MGYG000003001	976018	UHGG	known	AB1006_Saliva	98.54	0.37	Gradient Boost (General Model)	11	906	58483	332319018404908	1968925	56	1793	54	184400	None	near	HQ	d__Bacteria	p__Bacillota_A	c__Clostridia	o__Lachnospirales	f__Lachnospiraceae	g__Moryella	Moryella longum	Saliva
AB1006_Saliva.36	FerrettiP_2018__CA_C10002MS2015SA_t0M15__bin_26	961117	Pasolli_2019	known	AB1006_Saliva	51.72	0.04	Neural Network (Specific Model)	11	903	7865	270892	449326	36	500	71	27390	None	moderate	MQ	d__Bacteria	p__Patescibacteria	c__Saccharimonadia	o__Saccharimonadales	f__Nanogingivalaceae	g__Nanogingivalis	Nanogingivalis sp015257795	Saliva
AB1006_Saliva.46	GCF_001553935.1	9741	GTDB	known	AB1006_Saliva	58.13	1.9	Neural Network (Specific Model)	11	873	3321	2.78347e+16	1809425	69	1894	609	15140	None	moderate	MQ	d__Bacteria	p__Actinomycetota	c__Actinomycetes	o__Actinomycetales	f__Actinomycetaceae	g__Actinomyces	Actinomyces oris_A	Saliva
AB1006_Saliva.59	MGYG000001234	984025	UHGG	known	AB1006_Saliva	73.9	0.04	Gradient Boost (General Model)	11	891	3971	2.7659e+16	1091534	38	1174	316	11647	None	substantial	MQ	d__Bacteria	p__Bacillota_A	c__Clostridia	o__Peptostreptococcales	f__Peptostreptococcaceae	g__Peptostreptococcus	Peptostreptococcus sp900759325	Saliva
AB1006_Saliva.7	AB1006_Saliva.22	999744	Schmartz_2024	known	AB1006_Saliva	54.33	0.42	Gradient Boost (General Model)	11	927	3070	253994227994228	1137154	39	1386	385	11081	None	moderate	MQ	d__Bacteria	p__Bacillota_A	c__Clostridia	o__Lachnospirales	f__Lachnospiraceae	g__Lachnoanaerobaculum	Lachnoanaerobaculum orale	Saliva
AB1006_Saliva.9	GCA_001189495.1	9743	GTDB	known	AB1006_Saliva	52.94	0.47	Neural Network (Specific Model)	11	924	212638	3.31744e+16	951976	39	885	14	269304	None	moderate	MQ	d__Bacteria	p__Bacillota_A	c__Clostridia	o__Peptostreptococcales	f__Anaerovoracaceae	g__Eubacterium_B	Eubacterium_B sulci	Saliva
AB1007_Plaque.13	GCF_030546305.1	9751	GTDB	known	AB1007_Plaque	56.4	1.05	Neural Network (Specific Model)	11	864	7128	2674165467625899	1288103	42	1390	234	55689	None	moderate	MQ	d__Bacteria	p__Bacillota	c__Bacilli	o__Lactobacillales	f__Streptococcaceae	g__Streptococcus	Streptococcus sp030546305	Plaque
AB1007_Plaque.21	GCF_024584435.1	9835	GTDB	known	AB1007_Plaque	58.16	2.35	Neural Network (Specific Model)	11	889	3060	2638271261812118	1598294	67	1799	549	10078	None	moderate	MQ	d__Bacteria	p__Actinomycetota	c__Actinomycetes	o__Actinomycetales	f__Actinomycetaceae	g__Pauljensenia	Pauljensenia sp000185285	Plaque
AB1007_Plaque.25	AB1415_Plaque.6	963943	Schmartz_2024	known	AB1007_Plaque	97.18	0.35	Neural Network (Specific Model)	11	907	24425	3009794117647059	2028736	4	2040	159	91677	None	near	HQ	d__Bacteria	p__Pseudomonadota	c__Gammaproteobacteria	o__Enterobacterales	f__Pasteurellaceae	g__Haemophilus_D	Haemophilus_D parainfluenzae	Plaque
AB1007_Plaque.30	AB1007_Plaque.6	100	Schmartz_2024	known	AB1007_Plaque	99.79	0.15	Neural Network (Specific Model)	11	851	689908	2.86779e+16	1072825	52	1064	5	689908	None	near	HQ	d__Bacteria	p__Patescibacteria	c__Saccharimonadia	o__Saccharimonadales	f__Saccharimonadaceae	g__Saccharimonas		Plaque
AB1007_Saliva.7	GCA_015264985.1	954	GTDB	known	AB1007_Saliva	50.95	4.73	Neural Network (Specific Model)	11	877	4129	2.48024e+16	1315871	44	1555	346	39165	None	moderate	MQ	d__Bacteria	p__Bacillota	c__Bacilli	o__Lactobacillales	f__Streptococcaceae	g__Streptococcus	Streptococcus sanguinis_S	Saliva
AB1010_Plaque.35	CM_periimplantitis__SP_344SPT_T016__bin_25	987949	Pasolli_2019	known	AB1010_Plaque	59.65	0.9	Neural Network (Specific Model)	11	927	8094	2687871198568873	485217	45	559	76	32821	None	moderate	MQ	d__Bacteria	p__Patescibacteria	c__Saccharimonadia	o__Saccharimonadales	f__Nanosynbacteraceae	g__Nanosynbacter		Plaque
AB1010_Plaque.47	HMP_2012__SRS043018__bin_33	973552	Pasolli_2019	known	AB1010_Plaque	90.91	1.66	Neural Network (Specific Model)	11	883	19154	2994220338983051	2396166	58	2360	192	61028	None	near	HQ	d__Bacteria	p__Pseudomonadota	c__Gammaproteobacteria	o__Cardiobacteriales	f__Cardiobacteriaceae	g__Cardiobacterium		Plaque
AB1010_Plaque.49	AB1476_Plaque.16	97693	Schmartz_2024	known	AB1010_Plaque	99.91	0.12	Neural Network (Specific Model)	11	904	121336	3.24071e+16	2186097	55	2036	24	312075	None	near	HQ	d__Bacteria	p__Bacillota_C	c__Negativicutes	o__Selenomonadales	f__Selenomonadaceae	g__CAJPQU01	CAJPQU01 sp905373705	Plaque
AB1010_Plaque.5	AB1010_Plaque.56	999345	Schmartz_2024	known	AB1010_Plaque	59.47	0.52	Neural Network (Specific Model)	11	825	3245	2.47074e+16	1525103	65	1701	511	9701	None	moderate	MQ	d__Bacteria	p__Pseudomonadota	c__Gammaproteobacteria	o__Burkholderiales	f__Burkholderiaceae	g__Ottowia	Ottowia massiliensis	Plaque
AB1010_Plaque.51	AB1010_Plaque.28	999996	Schmartz_2024	known	AB1010_Plaque	54.14	1.51	Gradient Boost (General Model)	11	914	3358	2574708806818182	1187437	37	1408	371	22995	None	moderate	MQ	d__Bacteria	p__Bacillota_I	c__Bacilli_A	o__Erysipelotrichales	f__Erysipelotrichaceae	g__Bulleidia	Bulleidia moorei	Plaque
AB1010_Plaque.57	GCA_905373085.1	9797	GTDB	known	AB1010_Plaque	90.07	0.15	Neural Network (Specific Model)	11	888	18297	3.05621e+16	2302164	58	2234	234	90930	None	near	HQ	d__Bacteria	p__Bacillota_C	c__Negativicutes	o__Selenomonadales	f__Selenomonadaceae	g__Selenomonas	Selenomonas sp905373085	Plaque
AB1010_Plaque.72	HeQ_2017__SZAXPI029474-42__bin_12	996312	Pasolli_2019	known	AB1010_Plaque	55.82	3.74	Neural Network (Specific Model)	11	882	3353	2.50126e+16	1041763	35	1227	327	28032	None	moderate	MQ	d__Bacteria	p__Bacillota_C	c__Negativicutes	o__Veillonellales	f__Dialisteraceae	g__Allisonella	Allisonella pneumosinta	Plaque
AB1010_Plaque.75	MGYG000001381	966595	UHGG	known	AB1010_Plaque	88.41	0.59	Neural Network (Specific Model)	11	817	16366	2860128589798543	2449024	51	2333	208	57172	None	substantial	MQ	d__Bacteria	p__Pseudomonadota	c__Gammaproteobacteria	o__Burkholderiales	f__Neisseriaceae	g__Neisseria		Plaque
AB1010_Saliva.5	AB1010_Saliva.4	999997	Schmartz_2024	known	AB1010_Saliva	99.77	0.65	Neural Network (Specific Model)	11	914	742412	3.01796e+16	742412	43	751	1	742412	None	near	HQ	d__Bacteria	p__Patescibacteria	c__Saccharimonadia	o__Saccharimonadales	f__Nanosynbacteraceae	g__Nanosynbacter	Nanosynbacter sp007845355	Saliva
AB1011_Plaque.40	HMP_2012__SRS023938__bin_43	971831	Pasolli_2019	known	AB1011_Plaque	89.38	3	Gradient Boost (General Model)	11	86	9938	2770809042236764	1622345	38	1681	233	45690	None	substantial	MQ	d__Bacteria	p__Bacillota	c__Bacilli	o__Lactobacillales	f__Aerococcaceae	g__Granulicatella	Granulicatella adiacens	Plaque
AB1011_Plaque.5	GCF_000269805.1	9823	GTDB	known	AB1011_Plaque	84.05	4.48	Neural Network (Specific Model)	11	859	13865	3.19553e+16	2850272	68	2559	350	64833	None	substantial	MQ	d__Bacteria	p__Actinomycetota	c__Actinomycetes	o__Actinomycetales	f__Actinomycetaceae	g__Actinomyces	Actinomyces massiliensis	Plaque
AB1011_Plaque.7	AB1115_Plaque.30	973017	Schmartz_2024	known	AB1011_Plaque	96.96	1.74	Neural Network (Specific Model)	11	893	47732	2.97586e+16	861839	49	864	29	147864	None	near	HQ	d__Bacteria	p__Patescibacteria	c__Saccharimonadia	o__Saccharimonadales	f__Saccharimonadaceae	g__Saccharimonas	Saccharimonas sp013333675	Plaque
AB1011_Saliva.18	AB1225_Saliva.23	985288	Schmartz_2024	known	AB1011_Saliva	92.9	0.05	Gradient Boost (General Model)	11	896	20593	3104402555910543	1622361	56	1565	130	58191	None	near	HQ	d__Bacteria	p__Bacillota_A	c__Clostridia	o__Lachnospirales	f__Lachnospiraceae	g__Moryella	Moryella longum_A	Saliva
AB1011_Saliva.32	GCF_002959775.1	9616	GTDB	known	AB1011_Saliva	55.43	4.61	Neural Network (Specific Model)	11	882	7235	2856373801916933	1214337	39	1252	219	34390	None	moderate	MQ	d__Bacteria	p__Bacillota_C	c__Negativicutes	o__Veillonellales	f__Veillonellaceae	g__Veillonella	Veillonella rogosae	Saliva
AB1011_Saliva.36	AB1484_Throat.27	990184	Schmartz_2024	known	AB1011_Saliva	80.41	0.37	Gradient Boost (General Model)	11	937	5000	2739157894736842	1411691	4	1615	340	18715	None	substantial	MQ	d__Bacteria	p__Bacillota_A	c__Clostridia	o__Lachnospirales	f__Lachnospiraceae	g__F0428	F0428 sp003043955	Saliva
AB1011_Saliva.42	AB1011_Saliva.2	999991	Schmartz_2024	known	AB1011_Saliva	74.65	0.79	Neural Network (Specific Model)	11	889	6801	2746627712854758	554466	41	599	96	25808	None	substantial	MQ	d__Bacteria	p__Patescibacteria	c__Saccharimonadia	o__Saccharimonadales	f__Nanosyncoccaceae	g__Nanosyncoccus		Saliva
AB1012_Saliva.28	AB1154_Throat.2	969985	Schmartz_2024	known	AB1012_Saliva	85.27	0.46	Neural Network (Specific Model)	11	913	9036	2.99757e+16	1735268	4	1763	268	28630	None	substantial	MQ	d__Bacteria	p__Pseudomonadota	c__Gammaproteobacteria	o__Enterobacterales	f__Pasteurellaceae	g__Haemophilus_D	Haemophilus_D parainfluenzae_R	Saliva
AB1012_Saliva.5	AB1012_Saliva.1	999991	Schmartz_2024	known	AB1012_Saliva	50.45	0.17	Neural Network (Specific Model)	11	891	4287	2893926315789474	924494	4	950	238	15890	None	moderate	MQ	d__Bacteria	p__Bacillota_C	c__Negativicutes	o__Veillonellales	f__Veillonellaceae	g__Veillonella	Veillonella nakazawae	Saliva
AB1013_Saliva.10	AB1422_Saliva.36	964193	Schmartz_2024	known	AB1013_Saliva	91.55	0.32	Neural Network (Specific Model)	11	84	19993	3426019822639541	2342545	58	1917	165	65086	None	near	HQ	d__Bacteria	p__Bacteroidota	c__Bacteroidia	o__Bacteroidales	f__Tannerellaceae	g__Tannerella	Tannerella serpentiformis	Saliva
AB1013_Saliva.2	AB905_Throat.49	983794	Schmartz_2024	known	AB1013_Saliva	58.35	0.48	Neural Network (Specific Model)	11	921	3956	2.98562e+16	1072421	44	1104	304	15001	None	moderate	MQ	d__Bacteria	p__Bacteroidota	c__Bacteroidia	o__Flavobacteriales	f__Flavobacteriaceae	g__Capnocytophaga	Capnocytophaga gingivalis	Saliva
AB1014_Saliva.19	AB1051_Throat.12	967568	Schmartz_2024	known	AB1014_Saliva	99.71	0.02	Neural Network (Specific Model)	11	861	250264	3.67605e+16	2235409	56	1748	15	691044	None	near	HQ	d__Bacteria	p__Bacteroidota	c__Bacteroidia	o__Bacteroidales	f__Porphyromonadaceae	g__Porphyromonas	Porphyromonas pasteri	Saliva
AB1014_Saliva.22	GCF_001071995.1	9692	GTDB	known	AB1014_Saliva	54.21	0.07	Gradient Boost (General Model)	11	882	3583	2.54822e+16	677691	39	783	212	12537	None	moderate	MQ	d__Bacteria	p__Bacillota	c__Bacilli	o__Lactobacillales	f__Aerococcaceae	g__Granulicatella	Granulicatella sp001071995	Saliva
AB1014_Saliva.36	GCA_905372515.1	9872	GTDB	known	AB1014_Saliva	76.28	3.05	Gradient Boost (General Model)	11	93	5758	2635108173076923	705508	24	832	154	18324	None	substantial	MQ	d__Bacteria	p__Bacillota_I	c__Bacilli_A	o__RF39	f__UBA660	g__CAJPPJ01	CAJPPJ01 sp905372515	Saliva
AB1014_Saliva.37	GCA_013333295.2	9576	GTDB	known	AB1014_Saliva	52.5	1.56	Gradient Boost (General Model)	4	897	2878	2.67798e+16	500817	36	560	183	9522	None	moderate	MQ	d__Bacteria	p__Patescibacteria	c__JAEDAM01	o__Absconditabacterales	f__Absconditicoccaceae	g__HOT-345	HOT-345 sp013333295	Saliva
AB1015_Saliva.14	GCF_000160115.1	9783	GTDB	known	AB1015_Saliva	73.33	1.12	Gradient Boost (General Model)	11	879	5269	2.85396e+16	1628443	53	1674	356	33430	None	substantial	MQ	d__Bacteria	p__Bacillota_A	c__Clostridia	o__Lachnospirales	f__Lachnospiraceae	g__Shuttleworthia	Shuttleworthia satelles	Saliva
AB1015_Saliva.34	AB1015_Saliva.25	999891	Schmartz_2024	known	AB1015_Saliva	52.43	0.33	Neural Network (Specific Model)	11	946	2628	2.47154e+16	821482	42	1051	321	9284	None	moderate	MQ	d__Bacteria	p__Campylobacterota	c__Campylobacteria	o__Campylobacterales	f__Campylobacteraceae	g__Campylobacter_A	Campylobacter_A concisus_T	Saliva
AB1015_Saliva.40	AB1015_Saliva.30	999992	Schmartz_2024	known	AB1015_Saliva	53.25	2.38	Gradient Boost (General Model)	11	923	3572	2702170542635659	1129656	57	1290	334	13876	None	moderate	MQ	d__Bacteria	p__Bacillota_A	c__Clostridia	o__Lachnospirales	f__Lachnospiraceae	g__Moryella	Moryella longum_A	Saliva
AB1015_Saliva.50	AB1015_Saliva.8	999976	Schmartz_2024	known	AB1015_Saliva	57.51	0.09	Neural Network (Specific Model)	11	908	3307	2709712543554007	1026276	6	1148	330	14430	None	moderate	MQ	d__Bacteria	p__Actinomycetota	c__Actinomycetes	o__Actinomycetales	f__Actinomycetaceae	g__Mobiluncus	Mobiluncus sp916438445	Saliva
AB1017_Saliva.15	GCA_015264885.1	9645	GTDB	known	AB1017_Saliva	55.51	3.11	Gradient Boost (General Model)	11	898	2703	2437877094972067	582202	41	716	226	8372	None	moderate	MQ	d__Bacteria	p__Bacillota	c__Bacilli	o__Lactobacillales	f__Aerococcaceae	g__Granulicatella	Granulicatella sp015264885	Saliva
AB1017_Saliva.25	AB1017_Saliva.17	999881	Schmartz_2024	known	AB1017_Saliva	79.77	0.59	Neural Network (Specific Model)	11	919	4342	2983584558823529	1586760	42	1632	417	16911	None	substantial	MQ	d__Bacteria	p__Bacteroidota	c__Bacteroidia	o__Flavobacteriales	f__Flavobacteriaceae	g__Capnocytophaga	Capnocytophaga gingivalis	Saliva
AB1017_Saliva.8	AB1017_Throat.19	99581	Schmartz_2024	known	AB1017_Saliva	56.79	2.57	Gradient Boost (General Model)	11	91	3152	2992770398481973	1038545	39	1054	355	12138	None	moderate	MQ	d__Bacteria	p__Bacillota_A	c__Clostridia	o__Lachnospirales	f__Lachnospiraceae	g__Johnsonella	Johnsonella sp916438835	Saliva
AB1018_Saliva.14	GCF_023110115.1	9564	GTDB	known	AB1018_Saliva	54.34	3.07	Neural Network (Specific Model)	11	866	5633	2538179012345679	1137611	4	1296	248	40215	None	moderate	MQ	d__Bacteria	p__Bacillota	c__Bacilli	o__Lactobacillales	f__Streptococcaceae	g__Streptococcus	Streptococcus sp023110115	Saliva
AB1018_Saliva.34	AB1633_Throat.16	969796	Schmartz_2024	known	AB1018_Saliva	61.19	2.28	Gradient Boost (General Model)	11	903	3712	281407639323732	1490274	44	1597	428	14172	None	moderate	MQ	d__Bacteria	p__Bacillota_A	c__Clostridia	o__Lachnospirales	f__Lachnospiraceae	g__Oribacterium	Oribacterium asaccharolyticum	Saliva
AB1018_Saliva.37	AB1018_Saliva.7	999988	Schmartz_2024	known	AB1018_Saliva	59.16	1.16	Gradient Boost (General Model)	11	92	4075	276425219941349	1225778	58	1364	339	14359	None	moderate	MQ	d__Bacteria	p__Bacillota_A	c__Clostridia	o__Lachnospirales	f__Lachnospiraceae	g__Moryella	Moryella longum	Saliva
AB1018_Saliva.40	AB895_Sputum.3	952772	Schmartz_2024	known	AB1018_Saliva	85.88	1.04	Neural Network (Specific Model)	11	875	20357	3029758833426809	1848600	39	1783	174	102161	None	substantial	MQ	d__Bacteria	p__Bacillota_C	c__Negativicutes	o__Veillonellales	f__Veillonellaceae	g__Veillonella	Veillonella nakazawae	Saliva
AB1019_Plaque.10	GCF_000429225.1	9706	GTDB	known	AB1019_Plaque	56.71	0.64	Neural Network (Specific Model)	11	864	3865	2869580357142857	2226829	74	2240	637	14935	None	moderate	MQ	d__Bacteria	p__Actinomycetota	c__Actinomycetes	o__Actinomycetales	f__Actinomycetaceae	g__Actinomyces	Actinomyces dentalis	Plaque
AB1019_Saliva.10	AB1056_Plaque.4	9998	Schmartz_2024	known	AB1019_Saliva	100	0.23	Neural Network (Specific Model)	11	917	516278	3249387417218543	4486453	72	4228	18	746005	None	perfect	HQ	d__Bacteria	p__Actinomycetota	c__Actinomycetes	o__Propionibacteriales	f__Nocardioidaceae	g__Marmoricola		Saliva
AB1019_Saliva.12	GCA_001058355.1	9662	GTDB	known	AB1019_Saliva	67.06	0.65	Gradient Boost (General Model)	11	887	3013	2400947816826411	761479	39	939	259	14515	None	moderate	MQ	d__Bacteria	p__Bacillota	c__Bacilli	o__Lactobacillales	f__Aerococcaceae	g__Granulicatella	Granulicatella sp001058355	Saliva
AB1019_Saliva.4	GCF_002959915.1	9784	GTDB	known	AB1019_Saliva	50.93	4.15	Neural Network (Specific Model)	11	9	3289	2562100313479624	1087372	39	1276	349	15198	None	moderate	MQ	d__Bacteria	p__Bacillota_C	c__Negativicutes	o__Veillonellales	f__Veillonellaceae	g__Veillonella	Veillonella atypica	Saliva
AB1021_Plaque.14	GCF_013343115.1	9577	GTDB	known	AB1021_Plaque	62.54	1.08	Neural Network (Specific Model)	11	859	9305	2.72269e+16	1422841	44	1499	200	45865	None	moderate	MQ	d__Bacteria	p__Bacillota	c__Bacilli	o__Lactobacillales	f__Streptococcaceae	g__Streptococcus	Streptococcus sanguinis_H	Plaque
AB1021_Plaque.21	AB1021_Plaque.11	999962	Schmartz_2024	known	AB1021_Plaque	62.2	1.64	Neural Network (Specific Model)	11	869	4137	3.06422e+16	1434106	57	1357	380	11024	None	moderate	MQ	d__Bacteria	p__Bacteroidota	c__Bacteroidia	o__Bacteroidales	f__Porphyromonadaceae	g__Porphyromonas	Porphyromonas sp905372525	Plaque
AB1021_Plaque.27	GCF_900476045.1	9761	GTDB	known	AB1021_Plaque	98.97	1.19	Neural Network (Specific Model)	11	867	142780	3.0466e+16	1704849	3	1620	33	238171	None	near	HQ	d__Bacteria	p__Bacillota	c__Bacilli	o__Staphylococcales	f__Gemellaceae	g__Gemella	Gemella morbillorum	Plaque
AB1021_Plaque.31	AB1154_Plaque.31	957582	Schmartz_2024	known	AB1021_Plaque	64.13	1.76	Neural Network (Specific Model)	11	912	25843	3.25397e+16	1817448	4	1699	112	80762	None	moderate	MQ	d__Bacteria	p__Bacteroidota	c__Bacteroidia	o__Flavobacteriales	f__Flavobacteriaceae	g__Capnocytophaga	Capnocytophaga sputigena	Plaque
AB1021_Plaque.52	AB1110_Plaque.15	969416	Schmartz_2024	known	AB1021_Plaque	63.57	0.44	Neural Network (Specific Model)	11	898	5286	2.8452e+16	1004926	46	1059	216	21590	None	moderate	MQ	d__Bacteria	p__Actinomycetota	c__Coriobacteriia	o__Coriobacteriales	f__Atopobiaceae	g__Lancefieldella	Lancefieldella parvula	Plaque
AB1021_Plaque.56	AB1021_Plaque.4	999771	Schmartz_2024	known	AB1021_Plaque	62.65	1.38	Gradient Boost (General Model)	11	889	3247	2665832766825289	1319863	57	1471	429	15761	None	moderate	MQ	d__Bacteria	p__Bacillota_A	c__Clostridia	o__Lachnospirales	f__Lachnospiraceae	g__Oribacterium	Oribacterium sp000160135	Plaque
AB1021_Saliva.1	GCF_013393365.1	9602	GTDB	known	AB1021_Saliva	53.78	1.7	Neural Network (Specific Model)	11	876	4742	2774281124497992	1180648	38	1245	283	22758	None	moderate	MQ	d__Bacteria	p__Bacillota_C	c__Negativicutes	o__Veillonellales	f__Veillonellaceae	g__Veillonella	Veillonella nakazawae	Saliva
AB1021_Saliva.20	HMP_2012__SRS013170__bin_24	981168	Pasolli_2019	known	AB1021_Saliva	69.5	0.57	Neural Network (Specific Model)	11	908	3994	2.64787e+16	1852919	58	2124	503	20201	None	moderate	MQ	d__Bacteria	p__Actinomycetota	c__Actinomycetes	o__Mycobacteriales	f__Mycobacteriaceae	g__Corynebacterium	Corynebacterium durum	Saliva
AB1021_Saliva.31	GCA_900556355.1	9611	GTDB	known	AB1021_Saliva	99.45	0.33	Neural Network (Specific Model)	11	916	289833	294068511198946	729173	43	759	9	346965	None	near	HQ	d__Bacteria	p__Patescibacteria	c__Saccharimonadia	o__Saccharimonadales	f__Nanosynbacteraceae	g__Nanosynbacter	Nanosynbacter sp900556355	Saliva
AB1021_Saliva.33	AB1426_Throat.30	962658	Schmartz_2024	known	AB1021_Saliva	78.35	0.08	Neural Network (Specific Model)	11	902	4589	2.5383e+16	515482	36	612	128	21541	None	substantial	MQ	d__Bacteria	p__Patescibacteria	c__Saccharimonadia	o__Saccharimonadales	f__Nanogingivalaceae	g__Nanogingivalis	Nanogingivalis sp015257795	Saliva
AB1021_Saliva.35	AB1021_Saliva.3	999636	Schmartz_2024	known	AB1021_Saliva	53.06	1.29	Gradient Boost (General Model)	11	887	2584	2.68513e+16	1539990	66	1699	606	8868	None	moderate	MQ	d__Bacteria	p__Pseudomonadota	c__Gammaproteobacteria	o__Burkholderiales	f__Burkholderiaceae	g__Lautropia	Lautropia mirabilis	Saliva
AB1021_Saliva.8	GCF_900446695.1	9564	GTDB	known	AB1021_Saliva	57.54	1.7	Neural Network (Specific Model)	11	909	3264	2.58678e+16	1710375	39	2007	551	17927	None	moderate	MQ	d__Bacteria	p__Bacteroidota	c__Bacteroidia	o__Flavobacteriales	f__Flavobacteriaceae	g__Capnocytophaga	Capnocytophaga sputigena	Saliva
AB1022_Plaque.35	GCF_000235445.1	9935	GTDB	known	AB1022_Plaque	62.49	0.51	Gradient Boost (General Model)	11	882	3250	2749477911646586	1395216	36	1494	449	16075	None	moderate	MQ	d__Bacteria	p__Bacillota_A	c__Clostridia	o__Lachnospirales	f__Lachnospiraceae	g__Johnsonella	Johnsonella ignava	Plaque
AB1022_Plaque.42	HMP_2012__SRS015215__bin_44	965453	Pasolli_2019	known	AB1022_Plaque	98.08	0.25	Gradient Boost (General Model)	11	83	9250	3025752032520325	2148534	33	1968	311	31878	None	near	HQ	d__Bacteria	p__Bacillota_A	c__Clostridia	o__Peptostreptococcales	f__Filifactoraceae	g__Peptoanaerobacter	Peptoanaerobacter yurii	Plaque
AB1022_Plaque.5	AB1729_Plaque.32	98563	Schmartz_2024	known	AB1022_Plaque	62.12	0.79	Gradient Boost (General Model)	11	844	4134	2.57578e+16	1332222	57	1458	364	12488	None	moderate	MQ	d__Bacteria	p__Pseudomonadota	c__Gammaproteobacteria	o__Burkholderiales	f__Burkholderiaceae	g__Brachymonas		Plaque
AB1022_Plaque.63	AB1287_Plaque.1	973392	Schmartz_2024	known	AB1022_Plaque	96.35	0.16	Neural Network (Specific Model)	11	898	85907	3112457627118644	734629	34	708	15	114196	None	near	HQ	d__Bacteria	p__Patescibacteria	c__Saccharimonadia	o__Saccharimonadales	f__SDRK01	g__SDRK01	SDRK01 sp007845205	Plaque
AB1022_Plaque.8	GCF_000468115.1	9817	GTDB	known	AB1022_Plaque	68.81	0.3	Gradient Boost (General Model)	11	918	3405	2810647482014389	1656104	51	1807	521	13055	None	moderate	MQ	d__Bacteria	p__Spirochaetota	c__Spirochaetia	o__Treponematales	f__Treponemataceae	g__Treponema_D	Treponema_D socranskii	Plaque
AB1022_Saliva.36	GCF_002959775.1	967	GTDB	known	AB1022_Saliva	50.37	4.43	Neural Network (Specific Model)	11	877	4430	2.70077e+16	1085385	39	1176	277	18481	None	moderate	MQ	d__Bacteria	p__Bacillota_C	c__Negativicutes	o__Veillonellales	f__Veillonellaceae	g__Veillonella	Veillonella rogosae	Saliva
AB1023_Plaque.22	GCF_030408675.1	9685	GTDB	known	AB1023_Plaque	52.93	0.28	Neural Network (Specific Model)	11	908	3550	2.61186e+16	1637013	58	1902	496	15477	None	moderate	MQ	d__Bacteria	p__Actinomycetota	c__Actinomycetes	o__Mycobacteriales	f__Mycobacteriaceae	g__Corynebacterium	Corynebacterium durum	Plaque
AB1023_Plaque.29	GCF_003892345.1	9832	GTDB	known	AB1023_Plaque	65.07	0.65	Gradient Boost (General Model)	11	85	5379	2946219512195122	2980352	66	2870	663	24004	None	moderate	MQ	d__Bacteria	p__Pseudomonadota	c__Gammaproteobacteria	o__Burkholderiales	f__Burkholderiaceae	g__Lautropia	Lautropia dentalis	Plaque
AB1023_Plaque.3	GCF_000160555.1	9839	GTDB	known	AB1023_Plaque	92.74	1.46	Neural Network (Specific Model)	11	92	43067	3131456510550695	1979715	56	1943	82	156962	None	near	HQ	d__Bacteria	p__Bacillota_C	c__Negativicutes	o__Selenomonadales	f__Selenomonadaceae	g__Centipeda	Centipeda noxia	Plaque
AB1023_Plaque.32	HMP_2012__SRS016575__bin_38	973435	Pasolli_2019	known	AB1023_Plaque	76.64	1.21	Gradient Boost (General Model)	11	917	3949	2684274193548387	434538	35	496	122	10913	None	substantial	MQ	d__Bacteria	p__Patescibacteria	c__Saccharimonadia	o__Saccharimonadales	f__SDRK01	g__SDRK01	SDRK01 sp007845205	Plaque
AB1023_Plaque.41	AB1023_Plaque.43	999157	Schmartz_2024	known	AB1023_Plaque	66.05	1.02	Neural Network (Specific Model)	11	813	4229	2.34546e+16	1385940	56	1604	355	17533	None	moderate	MQ	d__Bacteria	p__Pseudomonadota	c__Gammaproteobacteria	o__Burkholderiales	f__Neisseriaceae	g__Eikenella	Eikenella exigua	Plaque
AB1023_Plaque.45	AB1023_Plaque.30	999778	Schmartz_2024	known	AB1023_Plaque	69.73	0.03	Gradient Boost (General Model)	11	911	4887	2827105263157895	529421	52	570	124	13019	None	moderate	MQ	d__Bacteria	p__Patescibacteria	c__Saccharimonadia	o__Saccharimonadales	f__Nanoperiomorbaceae	g__Nanoperiomorbus		Plaque
AB1023_Plaque.49	HMP_2012__SRS023938__bin_43	9692	Pasolli_2019	known	AB1023_Plaque	62.8	2.33	Gradient Boost (General Model)	11	885	3841	2.51502e+16	1485556	38	1746	417	27325	None	moderate	MQ	d__Bacteria	p__Bacillota	c__Bacilli	o__Lactobacillales	f__Aerococcaceae	g__Granulicatella	Granulicatella adiacens	Plaque
AB1023_Plaque.51	AB1023_Plaque.12	999942	Schmartz_2024	known	AB1023_Plaque	65.11	1.59	Neural Network (Specific Model)	11	911	3970	2.74748e+16	913189	5	1011	252	13847	None	moderate	MQ	d__Bacteria	p__Actinomycetota	c__Coriobacteriia	o__Coriobacteriales	f__Atopobiaceae	g__Lancefieldella	Lancefieldella sp024691995	Plaque
AB1023_Plaque.52	AB1489_Plaque.2	981542	Schmartz_2024	known	AB1023_Plaque	55.51	0.94	Neural Network (Specific Model)	11	9	4178	2648361111111111	1267734	57	1440	338	18856	None	moderate	MQ	d__Bacteria	p__Bacillota_C	c__Negativicutes	o__Selenomonadales	f__Selenomonadaceae	g__CAJPQU01	CAJPQU01 sp905372875	Plaque
AB1023_Plaque.56	MGYG000000111	997642	UHGG	known	AB1023_Plaque	65.87	2.11	Neural Network (Specific Model)	11	902	3470	2.53696e+16	1821944	61	2167	572	15302	None	moderate	MQ	d__Bacteria	p__Actinomycetota	c__Actinomycetes	o__Propionibacteriales	f__Propionibacteriaceae	g__Cutibacterium	Cutibacterium acnes	Plaque
AB1023_Plaque.7	GCF_938030725.1	9575	GTDB	known	AB1023_Plaque	54.44	0.19	Gradient Boost (General Model)	11	905	2803	2.59007e+16	1261334	65	1472	450	9583	None	moderate	MQ	d__Bacteria	p__Synergistota	c__Synergistia	o__Synergistales	f__Aminobacteriaceae	g__Fretibacterium	Fretibacterium sp938030725	Plaque
AB1023_Saliva.22	MGYG000003001	978752	UHGG	known	AB1023_Saliva	68.91	0.84	Gradient Boost (General Model)	11	898	8880	3005908733280881	1272862	58	1271	193	28454	None	moderate	MQ	d__Bacteria	p__Bacillota_A	c__Clostridia	o__Lachnospirales	f__Lachnospiraceae	g__Moryella	Moryella longum	Saliva
AB1023_Saliva.23	GCF_007990445.1	9804	GTDB	known	AB1023_Saliva	55.83	0.46	Neural Network (Specific Model)	11	851	6832	2740024	1206142	3	1250	238	24267	None	moderate	MQ	d__Bacteria	p__Fusobacteriota	c__Fusobacteriia	o__Fusobacteriales	f__Leptotrichiaceae	g__Leptotrichia	Leptotrichia wadei_A	Saliva
AB1023_Saliva.56	C50504_Diseased.10	967503	Schmartz_2024	known	AB1023_Saliva	84.82	4.34	Neural Network (Specific Model)	11	886	12534	2.87807e+16	1929850	4	1983	233	58880	None	substantial	MQ	d__Bacteria	p__Pseudomonadota	c__Gammaproteobacteria	o__Enterobacterales	f__Pasteurellaceae	g__Haemophilus_D	Haemophilus_D sp900764435	Saliva
AB1023_Saliva.66	GCA_015257755.1	9555	GTDB	known	AB1023_Saliva	64.99	1.59	Neural Network (Specific Model)	11	904	3209	2.36367e+16	434950	36	556	147	8334	None	moderate	MQ	d__Bacteria	p__Patescibacteria	c__Saccharimonadia	o__Saccharimonadales	f__Nanogingivalaceae	g__Nanogingivalis	Nanogingivalis sp015257755	Saliva
AB1032_Plaque.25	GCF_007990525.1	9728	GTDB	known	AB1032_Plaque	67.07	1.4	Neural Network (Specific Model)	11	867	3542	2620608543007607	1547039	31	1709	473	18077	None	moderate	MQ	d__Bacteria	p__Fusobacteriota	c__Fusobacteriia	o__Fusobacteriales	f__Leptotrichiaceae	g__Leptotrichia	Leptotrichia hofstadii	Plaque
AB1032_Plaque.33	GCA_938046115.1	9638	GTDB	known	AB1032_Plaque	98.3	0.35	Neural Network (Specific Model)	11	855	135353	2891119920713578	1021745	52	1009	9	301502	None	near	HQ	d__Bacteria	p__Patescibacteria	c__Saccharimonadia	o__Saccharimonadales	f__Saccharimonadaceae	g__Saccharimonas	Saccharimonas sp938046115	Plaque
AB1032_Plaque.34	AB1398_Plaque.4	950608	Schmartz_2024	known	AB1032_Plaque	79.83	1.58	Neural Network (Specific Model)	11	799	6885	2632338334195551	1905047	49	1933	348	36474	None	substantial	MQ	d__Bacteria	p__Campylobacterota	c__Campylobacteria	o__Campylobacterales	f__Campylobacteraceae	g__Campylobacter_B		Plaque
AB1032_Saliva.41	AB1744_Plaque.1	974223	Schmartz_2024	known	AB1032_Saliva	99	0.38	Neural Network (Specific Model)	11	896	96043	3235902181097158	1637346	41	1513	38	220984	None	near	HQ	d__Bacteria	p__Bacillota_A	c__Clostridia	o__Peptostreptococcales	f__Anaerovoracaceae	g__Mogibacterium	Mogibacterium diversum	Saliva
AB1032_Saliva.49	GCF_000257905.1	9514	GTDB	known	AB1032_Saliva	55.15	1.4	Neural Network (Specific Model)	11	884	24381	2.98662e+16	1063396	41	1051	72	86522	None	moderate	MQ	d__Bacteria	p__Bacillota	c__Bacilli	o__Lactobacillales	f__Streptococcaceae	g__Streptococcus	Streptococcus mitis_L	Saliva
AB1032_Saliva.63	GCF_014202695.1	9665	GTDB	known	AB1032_Saliva	59.9	2.93	Gradient Boost (General Model)	11	875	3518	2.69737e+16	1392173	44	1507	429	13611	None	moderate	MQ	d__Bacteria	p__Bacillota_A	c__Clostridia	o__Lachnospirales	f__Lachnospiraceae	g__Oribacterium	Oribacterium sinus	Saliva
AB1033_Plaque.11	AB1033_Plaque.40	999652	Schmartz_2024	known	AB1033_Plaque	58.12	0.92	Gradient Boost (General Model)	11	843	3330	2443845609065156	1224699	57	1412	398	9792	None	moderate	MQ	d__Bacteria	p__Pseudomonadota	c__Gammaproteobacteria	o__Burkholderiales	f__Burkholderiaceae	g__Brachymonas		Plaque
AB1033_Plaque.4	CM_periimplantitis__SP_133SPT_T016__bin_1	972911	Pasolli_2019	known	AB1033_Plaque	93.1	0.64	Neural Network (Specific Model)	11	909	119110	2999585798816568	834508	49	845	12	194258	None	near	HQ	d__Bacteria	p__Patescibacteria	c__Saccharimonadia	o__Saccharimonadales	f__Saccharimonadaceae	g__Saccharimonas	Saccharimonas sp905371715	Plaque
AB1033_Plaque.76	AB1033_Plaque.17	999956	Schmartz_2024	known	AB1033_Plaque	72.27	1.98	Gradient Boost (General Model)	11	86	4000	261903988183161	1851791	59	2031	509	15467	None	substantial	MQ	d__Bacteria	p__Pseudomonadota	c__Gammaproteobacteria	o__Burkholderiales	f__Rhodocyclaceae	g__Propionivibrio	Propionivibrio sp937923255	Plaque
AB1033_Saliva.28	AB1219_Saliva.24	963413	Schmartz_2024	known	AB1033_Saliva	92.09	2.64	Gradient Boost (General Model)	11	895	6315	2790254560882478	2200374	37	2357	445	28688	None	near	HQ	d__Bacteria	p__Bacillota_A	c__Clostridia	o__Lachnospirales	f__Lachnospiraceae	g__Lachnoanaerobaculum	Lachnoanaerobaculum sp000296385	Saliva
AB1033_Saliva.3	AB1105_Saliva.21	981641	Schmartz_2024	known	AB1033_Saliva	88.4	0.3	Neural Network (Specific Model)	11	853	17874	2913983286908078	1468222	36	1436	129	94537	None	substantial	MQ	d__Bacteria	p__Campylobacterota	c__Campylobacteria	o__Campylobacterales	f__Campylobacteraceae	g__Campylobacter_B		Saliva
AB1033_Saliva.32	AB1033_Saliva.12	999967	Schmartz_2024	known	AB1033_Saliva	53.44	1.29	Neural Network (Specific Model)	11	911	3362	2.545e+16	854235	46	1021	274	10356	None	moderate	MQ	d__Bacteria	p__Bacillota_C	c__Negativicutes	o__Veillonellales	f__Megasphaeraceae	g__Anaeroglobus	Anaeroglobus micronuciformis	Saliva
AB1033_Saliva.45	AB1008_Saliva.2	968306	Schmartz_2024	known	AB1033_Saliva	94.53	0.84	Neural Network (Specific Model)	11	924	14606	2901003134796238	1798618	4	1914	187	55757	None	near	HQ	d__Bacteria	p__Campylobacterota	c__Campylobacteria	o__Campylobacterales	f__Campylobacteraceae	g__Campylobacter_A	Campylobacter_A concisus_C	Saliva
AB1033_Saliva.49	AB1033_Saliva.21	999986	Schmartz_2024	known	AB1033_Saliva	56.19	1.11	Gradient Boost (General Model)	11	902	2715	2544131374243734	977613	4	1157	367	12199	None	moderate	MQ	d__Bacteria	p__Bacillota_A	c__Clostridia	o__Lachnospirales	f__Lachnospiraceae	g__Johnsonella	Johnsonella sp937927235	Saliva
AB1033_Saliva.54	AB1033_Saliva.46	999942	Schmartz_2024	known	AB1033_Saliva	63.38	1.64	Neural Network (Specific Model)	11	904	3475	2558249299719888	1210228	56	1428	373	11864	None	moderate	MQ	d__Bacteria	p__Bacillota_C	c__Negativicutes	o__Selenomonadales	f__Selenomonadaceae	g__CAJPQU01	CAJPQU01 sp905373705	Saliva
AB1033_Saliva.59	GCF_016651435.1	9696	GTDB	known	AB1033_Saliva	69.66	2.3	Gradient Boost (General Model)	11	899	3812	2.76117e+16	1512813	4	1644	440	25815	None	moderate	MQ	d__Bacteria	p__Bacillota_A	c__Clostridia	o__Lachnospirales	f__Lachnospiraceae	g__Catonella	Catonella massiliensis	Saliva
AB1033_Saliva.76	AB1335_Plaque.27	971256	Schmartz_2024	known	AB1033_Saliva	52.77	1.59	Neural Network (Specific Model)	11	865	15907	279609375	433441	51	448	41	36389	None	moderate	MQ	d__Bacteria	p__Patescibacteria	c__Saccharimonadia	o__Saccharimonadales	f__Saccharimonadaceae	g__Saccharimonas	Saccharimonas sp905371715	Saliva
AB1033_Saliva.79	GCA_905372095.1	9559	GTDB	known	AB1033_Saliva	51.46	0.19	Neural Network (Specific Model)	11	851	7122	2583072625698324	487720	48	537	84	28659	None	moderate	MQ	d__Bacteria	p__Patescibacteria	c__Saccharimonadia	o__Saccharimonadales	f__Saccharimonadaceae	g__Saccharimonas	Saccharimonas sp905372095	Saliva
AB1033_Saliva.8	AB1265_Plaque.24	962492	Schmartz_2024	known	AB1033_Saliva	87.32	0.27	Neural Network (Specific Model)	11	88	30862	3253317683881064	707752	51	639	42	159475	None	substantial	MQ	d__Bacteria	p__Patescibacteria	c__Saccharimonadia	o__Saccharimonadales	f__Nanoperiomorbaceae	g__Nanoperiomorbus		Saliva
AB1034_Plaque.21	AB1120_Plaque.28	961151	Schmartz_2024	known	AB1034_Plaque	66.44	0.73	Gradient Boost (General Model)	11	905	4455	2859647239263804	1233854	56	1304	312	18645	None	moderate	MQ	d__Bacteria	p__Actinomycetota	c__Actinomycetes	o__Actinomycetales	f__Actinomycetaceae	g__Pauljensenia	Pauljensenia sp000308055	Plaque
AB1034_Plaque.25	GCF_900637905.1	9776	GTDB	known	AB1034_Plaque	57.69	4.43	Neural Network (Specific Model)	11	859	2863	2.35874e+16	1203310	3	1465	428	11536	None	moderate	MQ	d__Bacteria	p__Bacillota_A	c__Clostridia	o__Tissierellales	f__Peptoniphilaceae	g__Parvimonas	Parvimonas micra	Plaque
AB1034_Plaque.38	AB1110_Throat.1	984963	Schmartz_2024	known	AB1034_Plaque	100	0.13	Neural Network (Specific Model)	11	87	60951	3087286678944138	1732299	3	1629	64	229153	None	perfect	HQ	d__Bacteria	p__Bacillota	c__Bacilli	o__Staphylococcales	f__Gemellaceae	g__Gemella	Gemella sanguinis	Plaque
AB1034_Plaque.43	GCF_006385805.1	963	GTDB	known	AB1034_Plaque	53.11	1.96	Neural Network (Specific Model)	11	869	5396	2.5805e+16	1003904	43	1129	221	40588	None	moderate	MQ	d__Bacteria	p__Bacillota	c__Bacilli	o__Lactobacillales	f__Streptococcaceae	g__Streptococcus	Streptococcus xiaochunlingii	Plaque
AB1034_Plaque.49	CM_periimplantitis__SP_164SPT_T016__bin_4	985567	Pasolli_2019	known	AB1034_Plaque	71.6	1.62	Neural Network (Specific Model)	11	901	8953	3.20505e+16	1413171	66	1326	222	35390	None	substantial	MQ	d__Bacteria	p__Actinomycetota	c__Actinomycetes	o__Actinomycetales	f__Actinomycetaceae	g__Pauljensenia	Pauljensenia odontolytica_A	Plaque
AB1034_Plaque.6	GCF_001648475.1	9611	GTDB	known	AB1034_Plaque	51.9	0.89	Neural Network (Specific Model)	11	835	3301	2.48994e+16	1135570	58	1271	375	19556	None	moderate	MQ	d__Bacteria	p__Pseudomonadota	c__Gammaproteobacteria	o__Burkholderiales	f__Neisseriaceae	g__Eikenella	Eikenella halliae	Plaque
AB1034_Saliva.19	GCF_002959915.1	9759	GTDB	known	AB1034_Saliva	79.81	0.26	Neural Network (Specific Model)	11	885	19174	3058126964173476	1646758	39	1591	140	56688	None	substantial	MQ	d__Bacteria	p__Bacillota_C	c__Negativicutes	o__Veillonellales	f__Veillonellaceae	g__Veillonella	Veillonella atypica	Saliva
AB1034_Saliva.27	AB1056_Plaque.4	99866	Schmartz_2024	known	AB1034_Saliva	59.89	3.07	Neural Network (Specific Model)	11	916	2790	2.50937e+16	2756100	71	3360	1027	9245	None	moderate	MQ	d__Bacteria	p__Actinomycetota	c__Actinomycetes	o__Propionibacteriales	f__Nocardioidaceae	g__Marmoricola		Saliva
AB1034_Saliva.4	AB1034_Saliva.1	999948	Schmartz_2024	known	AB1034_Saliva	75.38	3.3	Neural Network (Specific Model)	11	902	3848	2687838869797633	2335608	67	2619	682	11379	None	substantial	MQ	d__Bacteria	p__Actinomycetota	c__Actinomycetes	o__Propionibacteriales	f__Propionibacteriaceae	g__Arachnia	Arachnia propionica	Saliva
AB1035_Plaque.12	AB1035_Plaque.5	999826	Schmartz_2024	known	AB1035_Plaque	60.9	1.04	Neural Network (Specific Model)	11	912	2927	2768793706293706	1558863	5	1716	549	10437	None	moderate	MQ	d__Bacteria	p__Spirochaetota	c__Spirochaetia	o__Treponematales	f__Treponemataceae	g__Treponema_D	Treponema_D buccale	Plaque
AB1035_Plaque.15	GCA_005697215.1	9866	GTDB	known	AB1035_Plaque	62.49	0.1	Neural Network (Specific Model)	11	923	7267	2686042296072508	575536	51	662	95	24550	None	moderate	MQ	d__Bacteria	p__Patescibacteria	c__Saccharimonadia	o__Saccharimonadales	f__Nanosynbacteraceae	g__Nanosynbacter	Nanosynbacter sp005697215	Plaque
AB1035_Plaque.24	AB1035_Plaque.12	99997	Schmartz_2024	known	AB1035_Plaque	78.56	1.34	Gradient Boost (General Model)	11	902	3726	2.73149e+16	1419943	39	1565	425	14970	None	substantial	MQ	d__Bacteria	p__Bacillota_A	c__Clostridia	o__Lachnospirales	f__Lachnospiraceae	g__Johnsonella	Johnsonella sp937927235	Plaque
AB1035_Plaque.32	AB1373_Plaque.4	973459	Schmartz_2024	known	AB1035_Plaque	100	0.09	Neural Network (Specific Model)	11	86	379892	3.32921e+16	2450574	54	2111	10	677224	None	perfect	HQ	d__Bacteria	p__Actinomycetota	c__Actinomycetes	o__Actinomycetales	f__Micrococcaceae	g__Rothia	Rothia dentocariosa	Plaque
AB1035_Plaque.43	AB1656_Plaque.19	97861	Schmartz_2024	known	AB1035_Plaque	91.27	3.66	Neural Network (Specific Model)	11	899	11195	2.9412e+16	2196601	58	2242	295	42630	None	near	HQ	d__Bacteria	p__Bacillota_C	c__Negativicutes	o__Selenomonadales	f__Selenomonadaceae	g__CAJPQU01		Plaque
AB1035_Plaque.44	GCF_938030725.1	9729	GTDB	known	AB1035_Plaque	64.44	1.77	Gradient Boost (General Model)	11	906	3208	2750161394448031	1408510	66	1549	468	16184	None	moderate	MQ	d__Bacteria	p__Synergistota	c__Synergistia	o__Synergistales	f__Aminobacteriaceae	g__Fretibacterium	Fretibacterium sp938030725	Plaque
AB1035_Plaque.72	MGYG000004562	980723	UHGG	known	AB1035_Plaque	76.03	0.16	Neural Network (Specific Model)	11	858	27022	2906818532818533	1313351	31	1295	95	77007	None	substantial	MQ	d__Bacteria	p__Bacillota	c__Bacilli	o__Staphylococcales	f__Gemellaceae	g__Gemella	Gemella morbillorum	Plaque
AB1035_Plaque.80	GCF_015553625.1	9607	GTDB	known	AB1035_Plaque	59.7	3.61	Neural Network (Specific Model)	11	904	3992	2.66905e+16	1235229	43	1397	340	15140	None	moderate	MQ	d__Bacteria	p__Bacillota	c__Bacilli	o__Lactobacillales	f__Streptococcaceae	g__Streptococcus	Streptococcus australis_B	Plaque
AB1035_Plaque.86	GCF_000010505.1	9865	GTDB	known	AB1035_Plaque	76.64	0.11	Neural Network (Specific Model)	11	869	21274	3455090909090909	1572024	49	1320	101	81779	None	substantial	MQ	d__Bacteria	p__Bacteroidota	c__Bacteroidia	o__Bacteroidales	f__Porphyromonadaceae	g__Porphyromonas	Porphyromonas gingivalis	Plaque
AB1035_Plaque.92	GCF_938040765.1	9819	GTDB	known	AB1035_Plaque	88.08	0.26	Gradient Boost (General Model)	11	881	5661	29101949717804	1927825	65	1949	407	29755	None	substantial	MQ	d__Bacteria	p__Synergistota	c__Synergistia	o__Synergistales	f__Aminobacteriaceae	g__CAJPSE01	CAJPSE01 sp938040765	Plaque
AB1035_Plaque.97	GCF_900637725.1	9749	GTDB	known	AB1035_Plaque	54.56	4.19	Neural Network (Specific Model)	11	911	2511	2563102369244524	1883555	67	2237	755	8147	None	moderate	MQ	d__Bacteria	p__Actinomycetota	c__Actinomycetes	o__Propionibacteriales	f__Propionibacteriaceae	g__Arachnia	Arachnia propionica	Plaque
AB1035_Saliva.16	AB1035_Saliva.11	999993	Schmartz_2024	known	AB1035_Saliva	86.19	0.07	Neural Network (Specific Model)	11	893	24051	3.17502e+16	2151519	59	2022	118	86771	None	substantial	MQ	d__Bacteria	p__Bacillota_C	c__Negativicutes	o__Selenomonadales	f__Selenomonadaceae	g__Selenomonas	Selenomonas sp916438625	Saliva
AB1035_Saliva.22	GCF_016651435.1	9628	GTDB	known	AB1035_Saliva	95.54	2.9	Gradient Boost (General Model)	11	884	38871	3.18469e+16	2758385	39	2556	131	114203	None	near	HQ	d__Bacteria	p__Bacillota_A	c__Clostridia	o__Lachnospirales	f__Lachnospiraceae	g__Catonella	Catonella massiliensis	Saliva
AB1035_Saliva.24	FerrettiP_2018__CA_C10035MS2597SA_t0M15__bin_2	973086	Pasolli_2019	known	AB1035_Saliva	55.48	0.45	Neural Network (Specific Model)	11	873	5346	3.04915e+16	1446078	42	1382	320	18059	None	moderate	MQ	d__Bacteria	p__Bacteroidota	c__Bacteroidia	o__Bacteroidales	f__Bacteroidaceae	g__Prevotella	Prevotella vespertina	Saliva
AB1035_Saliva.28	AB1250_Throat.25	961464	Schmartz_2024	known	AB1035_Saliva	75.02	3.35	Gradient Boost (General Model)	11	911	4629	2703057432432432	526393	41	592	128	15314	None	substantial	MQ	d__Bacteria	p__Patescibacteria	c__Saccharimonadia	o__Saccharimonadales	f__Nanosyncoccaceae	g__Nanosyncoccus		Saliva
AB1035_Saliva.53	GCF_000701685.1	9617	GTDB	known	AB1035_Saliva	52.13	0.04	Neural Network (Specific Model)	11	874	38609	3078775773195876	818945	3	776	46	126585	None	moderate	MQ	d__Bacteria	p__Bacillota	c__Bacilli	o__Staphylococcales	f__Gemellaceae	g__Gemella	Gemella sanguinis	Saliva
AB1035_Saliva.54	AB1035_Saliva.20	999985	Schmartz_2024	known	AB1035_Saliva	99.03	0.28	Neural Network (Specific Model)	11	919	78245	3.47629e+16	1858958	57	1641	41	171850	None	near	HQ	d__Bacteria	p__Actinomycetota	c__Actinomycetes	o__Actinomycetales	f__Actinomycetaceae	g__Pauljensenia	Pauljensenia marseillensis	Saliva
AB1035_Saliva.58	AB1414_Throat.33	983355	Schmartz_2024	known	AB1035_Saliva	81.96	0.83	Neural Network (Specific Model)	11	878	6632	2596543147208122	1743881	46	1970	332	29987	None	substantial	MQ	d__Bacteria	p__Campylobacterota	c__Campylobacteria	o__Campylobacterales	f__Campylobacteraceae	g__Campylobacter_A	Campylobacter_A showae_A	Saliva
AB1035_Saliva.62	HMP_2012__SRS049389__bin_7	976726	Pasolli_2019	known	AB1035_Saliva	98.4	0.74	Gradient Boost (General Model)	11	909	67089	3295515409139214	2041865	55	1882	54	212554	None	near	HQ	d__Bacteria	p__Bacillota_A	c__Clostridia	o__Lachnospirales	f__Lachnospiraceae	g__Moryella	Moryella longum_A	Saliva
AB1035_Saliva.67	AB1035_Saliva.8	999509	Schmartz_2024	known	AB1035_Saliva	68.03	0.27	Neural Network (Specific Model)	11	889	11421	3393170441001192	1918178	45	1678	223	58341	None	moderate	MQ	d__Bacteria	p__Bacteroidota	c__Bacteroidia	o__Bacteroidales	f__Bacteroidaceae	g__Prevotella		Saliva
AB1035_Saliva.69	AB1172_Throat.16	955452	Schmartz_2024	known	AB1035_Saliva	82.67	1.17	Gradient Boost (General Model)	11	876	5001	2.86016e+16	1870598	44	1912	437	19181	None	substantial	MQ	d__Bacteria	p__Bacillota_A	c__Clostridia	o__Lachnospirales	f__Lachnospiraceae	g__Oribacterium		Saliva
AB1035_Saliva.78	AB1637_Stool.4	979422	Schmartz_2024	known	AB1035_Saliva	89	1.5	Neural Network (Specific Model)	11	877	23709	3452345744680851	2216476	66	1880	136	139723	None	substantial	MQ	d__Bacteria	p__Actinomycetota	c__Actinomycetes	o__Actinomycetales	f__Actinomycetaceae	g__Pauljensenia	Pauljensenia sp902373545	Saliva
AB1035_Saliva.83	AB1017_Throat.19	984562	Schmartz_2024	known	AB1035_Saliva	58.85	0.08	Gradient Boost (General Model)	11	878	56285	3.23503e+16	1078461	36	977	27	127676	None	moderate	MQ	d__Bacteria	p__Bacillota_A	c__Clostridia	o__Lachnospirales	f__Lachnospiraceae	g__Johnsonella	Johnsonella sp916438835	Saliva
AB1035_Saliva.86	AB1398_Saliva.23	960106	Schmartz_2024	known	AB1035_Saliva	90.82	2.55	Gradient Boost (General Model)	11	907	11314	2906503067484663	1564463	37	1630	210	71296	None	near	HQ	d__Bacteria	p__Bacillota_I	c__Bacilli_A	o__Erysipelotrichales	f__Erysipelotrichaceae	g__Bulleidia		Saliva
AB1035_Saliva.88	AB1035_Saliva.36	999964	Schmartz_2024	known	AB1035_Saliva	82.85	0.75	Gradient Boost (General Model)	11	917	5991	28521573875803	1740089	41	1868	368	39950	None	substantial	MQ	d__Bacteria	p__Bacteroidota	c__Bacteroidia	o__Flavobacteriales	f__Flavobacteriaceae	g__Capnocytophaga	Capnocytophaga leadbetteri_A	Saliva
AB1036_Plaque.18	GCF_000185385.1	9819	GTDB	known	AB1036_Plaque	57.23	0.86	Gradient Boost (General Model)	11	922	2925	2653862295081967	1314009	38	1525	457	10970	None	moderate	MQ	d__Bacteria	p__Bacillota_A	c__Clostridia	o__Lachnospirales	f__Lachnospiraceae	g__Lachnoanaerobaculum	Lachnoanaerobaculum saburreum	Plaque
AB1036_Plaque.21	GCA_905372035.1	9912	GTDB	known	AB1036_Plaque	80.44	0.07	Gradient Boost (General Model)	11	901	5137	2801373265157049	1274708	38	1369	304	26190	None	substantial	MQ	d__Bacteria	p__Bacillota_A	c__Clostridia	o__Peptostreptococcales	f__Anaerovoracaceae	g__CAJPNN01	CAJPNN01 sp905372035	Plaque
AB1036_Plaque.23	AB1243_Throat.13	979057	Schmartz_2024	known	AB1036_Plaque	56.11	3.73	Neural Network (Specific Model)	11	887	4507	2.51077e+16	1289673	39	1522	340	18504	None	moderate	MQ	d__Bacteria	p__Bacillota	c__Bacilli	o__Lactobacillales	f__Streptococcaceae	g__Streptococcus	Streptococcus anginosus	Plaque
AB1036_Plaque.66	AB1670_Plaque.28	989117	Schmartz_2024	known	AB1036_Plaque	54.61	0.83	Neural Network (Specific Model)	11	884	15383	3.20585e+16	1292106	44	1189	124	36157	None	moderate	MQ	d__Bacteria	p__Bacteroidota	c__Bacteroidia	o__Bacteroidales	f__Bacteroidaceae	g__Prevotella	Prevotella pleuritidis	Plaque
AB1036_Plaque.73	CM_periimplantitis__SP_387SPT_T016__bin_18	987731	Pasolli_2019	known	AB1036_Plaque	69.26	1.49	Gradient Boost (General Model)	11	92	4760	2684657142857143	1222723	37	1400	294	18681	None	moderate	MQ	d__Bacteria	p__Bacillota_I	c__Bacilli_A	o__Erysipelotrichales	f__Erysipelotrichaceae	g__Bulleidia	Bulleidia moorei	Plaque
AB1036_Plaque.79	HMP_2012__SRS022536__bin_35	970563	Pasolli_2019	known	AB1036_Plaque	98.2	0.41	Neural Network (Specific Model)	11	856	270130	2.93182e+16	1012474	52	987	6	293641	None	near	HQ	d__Bacteria	p__Patescibacteria	c__Saccharimonadia	o__Saccharimonadales	f__Saccharimonadaceae	g__Saccharimonas		Plaque
AB1036_Saliva.10	AB1169_Plaque.6	972132	Schmartz_2024	known	AB1036_Saliva	50.65	3.16	Neural Network (Specific Model)	11	886	2725	2.77307e+16	1642631	7	1753	615	9091	None	moderate	MQ	d__Bacteria	p__Actinomycetota	c__Actinomycetes	o__Actinomycetales	f__Actinomycetaceae	g__Actinomyces	Actinomyces oris_A	Saliva
AB1036_Saliva.15	GCF_001434335.1	9991	GTDB	known	AB1036_Saliva	86.24	0.83	Neural Network (Specific Model)	11	89	38071	3054449594438007	1774077	36	1726	88	115487	None	substantial	MQ	d__Bacteria	p__Bacillota	c__Bacilli	o__Lactobacillales	f__Lactobacillaceae	g__Lactobacillus	Lactobacillus kalixensis	Saliva
AB1036_Saliva.23	AB1483_Throat.20	993573	Schmartz_2024	known	AB1036_Saliva	99.99	0.01	Neural Network (Specific Model)	11	872	120586	3352360217714003	2325536	6	2021	31	286237	None	near	HQ	d__Bacteria	p__Actinomycetota	c__Actinomycetes	o__Actinomycetales	f__Bifidobacteriaceae	g__Bifidobacterium	Bifidobacterium longum	Saliva
AB1036_Saliva.3	AB1134_Throat.18	961908	Schmartz_2024	known	AB1036_Saliva	97.74	0.2	Neural Network (Specific Model)	11	918	717452	2.96101e+16	717452	43	743	1	717452	None	near	HQ	d__Bacteria	p__Patescibacteria	c__Saccharimonadia	o__Saccharimonadales	f__Nanosynbacteraceae	g__Nanosynbacter		Saliva
AB1036_Saliva.4	GCF_000239695.1	9694	GTDB	known	AB1036_Saliva	88.19	0.77	Neural Network (Specific Model)	11	881	92082	3538776315789474	1829917	58	1520	29	175168	None	substantial	MQ	d__Bacteria	p__Actinomycetota	c__Actinomycetes	o__Actinomycetales	f__Actinomycetaceae	g__Actinomyces	Actinomyces graevenitzii	Saliva
AB1039_Plaque.30	GCA_030253535.1	988	GTDB	known	AB1039_Plaque	87.82	0.98	Neural Network (Specific Model)	11	903	380810	3013466850828729	723421	5	724	10	380810	None	substantial	MQ	d__Bacteria	p__Patescibacteria	c__Saccharimonadia	o__Saccharimonadales	f__Saccharimonadaceae	g__Saccharimonas	Saccharimonas sp905371715	Plaque
AB1039_Plaque.39	AB1039_Plaque.16	99998	Schmartz_2024	known	AB1039_Plaque	74.51	3.03	Neural Network (Specific Model)	11	926	3651	2.71685e+16	1856072	48	2115	568	13761	None	substantial	MQ	d__Bacteria	p__Spirochaetota	c__Spirochaetia	o__Treponematales	f__Treponemataceae	g__Treponema_C	Treponema_C sp905372025	Plaque
AB1039_Plaque.44	GCF_000158275.2	9748	GTDB	known	AB1039_Plaque	52.87	3.2	Neural Network (Specific Model)	11	894	2313	2.46009e+16	970011	28	1177	410	14568	None	moderate	MQ	d__Bacteria	p__Fusobacteriota	c__Fusobacteriia	o__Fusobacteriales	f__Fusobacteriaceae	g__Fusobacterium	Fusobacterium animalis	Plaque
AB1039_Plaque.47	AB1254_Plaque.40	989126	Schmartz_2024	known	AB1039_Plaque	95.22	0.16	Gradient Boost (General Model)	11	884	89952	3.17058e+16	2447107	58	2277	38	293552	None	near	HQ	d__Bacteria	p__Pseudomonadota	c__Gammaproteobacteria	o__Cardiobacteriales	f__Cardiobacteriaceae	g__Cardiobacterium	Cardiobacterium sp916618745	Plaque
AB1039_Saliva.16	GCF_009738225.1	9637	GTDB	known	AB1039_Saliva	58.1	2.41	Neural Network (Specific Model)	11	84	6210	257678599840891	1154192	4	1257	231	57606	None	moderate	MQ	d__Bacteria	p__Bacillota	c__Bacilli	o__Lactobacillales	f__Streptococcaceae	g__Streptococcus	Streptococcus sp001556435	Saliva
AB1039_Saliva.21	HMP_2012__SRS017227__bin_41	988846	Pasolli_2019	known	AB1039_Saliva	71.26	0.13	Neural Network (Specific Model)	11	887	5711	3050670588235294	1750866	46	1700	366	25196	None	substantial	MQ	d__Bacteria	p__Bacteroidota	c__Bacteroidia	o__Bacteroidales	f__Bacteroidaceae	g__Prevotella	Prevotella pleuritidis	Saliva
AB1039_Saliva.3	AB1039_Saliva.20	999024	Schmartz_2024	known	AB1039_Saliva	67.77	0.02	Gradient Boost (General Model)	11	858	5198	2.55592e+16	927477	39	1040	215	31055	None	moderate	MQ	d__Bacteria	p__Bacillota	c__Bacilli	o__Lactobacillales	f__Aerococcaceae	g__Granulicatella	Granulicatella sp001058355	Saliva
AB1039_Saliva.32	GCA_959600045.1	9728	GTDB	known	AB1039_Saliva	73.97	3.47	Neural Network (Specific Model)	11	905	3435	2.55565e+16	1354144	4	1601	413	14790	None	substantial	MQ	d__Bacteria	p__Pseudomonadota	c__Gammaproteobacteria	o__Enterobacterales	f__Pasteurellaceae	g__Haemophilus_D	Haemophilus_D sp959600045	Saliva
AB1039_Saliva.42	AB1039_Saliva.28	999529	Schmartz_2024	known	AB1039_Saliva	76.57	0.13	Gradient Boost (General Model)	11	89	6666	2852859244727808	1957943	4	2039	380	21653	None	substantial	MQ	d__Bacteria	p__Bacillota_A	c__Clostridia	o__Lachnospirales	f__Lachnospiraceae	g__Catonella	Catonella massiliensis	Saliva
AB1039_Saliva.51	AB1039_Saliva.41	999079	Schmartz_2024	known	AB1039_Saliva	62.62	1.31	Neural Network (Specific Model)	11	909	3132	2.61202e+16	1370459	58	1593	472	11393	None	moderate	MQ	d__Bacteria	p__Bacillota_C	c__Negativicutes	o__Selenomonadales	f__Selenomonadaceae	g__Selenomonas	Selenomonas sp905372355	Saliva
AB1039_Saliva.52	AB1039_Saliva.29	999918	Schmartz_2024	known	AB1039_Saliva	61.96	0.14	Neural Network (Specific Model)	11	914	5513	2.83108e+16	1470337	42	1584	333	20367	None	moderate	MQ	d__Bacteria	p__Bacteroidota	c__Bacteroidia	o__Flavobacteriales	f__Flavobacteriaceae	g__Capnocytophaga	Capnocytophaga leadbetteri_A	Saliva
AB1048_Plaque.10	GCF_009730335.1	9785	GTDB	known	AB1048_Plaque	99.99	0.08	Neural Network (Specific Model)	11	889	152556	3445053974484789	2366116	65	2038	32	297474	None	near	HQ	d__Bacteria	p__Actinomycetota	c__Actinomycetes	o__Actinomycetales	f__Actinomycetaceae	g__Pauljensenia	Pauljensenia odontolytica_A	Plaque
AB1048_Plaque.11	AB1120_Plaque.28	962531	Schmartz_2024	known	AB1048_Plaque	96.45	0.18	Neural Network (Specific Model)	11	921	37436	3.50294e+16	1909677	56	1676	76	172598	None	near	HQ	d__Bacteria	p__Actinomycetota	c__Actinomycetes	o__Actinomycetales	f__Actinomycetaceae	g__Pauljensenia		Plaque
AB1048_Plaque.3	AB1048_Plaque.15	999908	Schmartz_2024	known	AB1048_Plaque	82.39	1.08	Gradient Boost (General Model)	11	879	3745	2.82056e+16	2140469	66	2228	647	17320	None	substantial	MQ	d__Bacteria	p__Pseudomonadota	c__Gammaproteobacteria	o__Burkholderiales	f__Burkholderiaceae	g__Lautropia	Lautropia mirabilis	Plaque
AB1048_Saliva.21	AB1221_Saliva.38	995908	Schmartz_2024	known	AB1048_Saliva	100	0.01	Neural Network (Specific Model)	11	913	151019	3.17798e+16	2006669	39	1924	19	337516	None	perfect	HQ	d__Bacteria	p__Pseudomonadota	c__Gammaproteobacteria	o__Enterobacterales	f__Pasteurellaceae	g__Haemophilus_D	Haemophilus_D parainfluenzae_R	Saliva
AB1048_Saliva.32	AB1463_Forehead.12	960517	Schmartz_2024	known	AB1048_Saliva	95.15	0.3	Neural Network (Specific Model)	11	833	164047	3.5689e+16	2218425	6	1727	34	415603	None	near	HQ	d__Bacteria	p__Actinomycetota	c__Actinomycetes	o__Actinomycetales	f__Micrococcaceae	g__Rothia	Rothia mucilaginosa	Saliva
AB1048_Saliva.4	AB1422_Saliva.36	98098	Schmartz_2024	known	AB1048_Saliva	59	0.32	Neural Network (Specific Model)	11	865	4553	3215285285285285	1483128	59	1332	370	19729	None	moderate	MQ	d__Bacteria	p__Bacteroidota	c__Bacteroidia	o__Bacteroidales	f__Tannerellaceae	g__Tannerella	Tannerella serpentiformis	Saliva
AB1048_Saliva.46	AB1470_Saliva.13	974145	Schmartz_2024	known	AB1048_Saliva	51.99	2.53	Gradient Boost (General Model)	11	91	2909	2.44603e+16	1519923	37	1889	541	13298	None	moderate	MQ	d__Bacteria	p__Bacillota_A	c__Clostridia	o__Lachnospirales	f__Lachnospiraceae	g__Lachnoanaerobaculum	Lachnoanaerobaculum sp000287675	Saliva
AB1048_Saliva.61	AB1470_Plaque.12	989702	Schmartz_2024	known	AB1048_Saliva	99.2	0.09	Neural Network (Specific Model)	11	879	94476	3199685039370079	2078578	39	1905	34	245145	None	near	HQ	d__Bacteria	p__Bacillota_C	c__Negativicutes	o__Veillonellales	f__Veillonellaceae	g__Veillonella	Veillonella rogosae	Saliva
AB1048_Saliva.62	AB1773_Throat.19	973762	Schmartz_2024	known	AB1048_Saliva	98.75	0.13	Neural Network (Specific Model)	11	913	50163	3308138663335415	1737702	4	1601	57	150784	None	near	HQ	d__Bacteria	p__Bacillota_A	c__Clostridia	o__Peptostreptococcales	f__Anaerovoracaceae	g__Eubacterium_B	Eubacterium_B sulci	Saliva
AB1051_Plaque.10	AB1005_Plaque.25	983625	Schmartz_2024	known	AB1051_Plaque	91.19	0.08	Neural Network (Specific Model)	11	88	26137	3022394613583138	1756470	38	1708	100	90518	None	near	HQ	d__Bacteria	p__Bacillota	c__Bacilli	o__Lactobacillales	f__Streptococcaceae	g__Streptococcus	Streptococcus intermedius	Plaque
AB1051_Plaque.15	GCF_014054985.1	9647	GTDB	known	AB1051_Plaque	99.96	0.02	Neural Network (Specific Model)	11	826	153165	2.91179e+16	2196847	55	2080	26	264827	None	near	HQ	d__Bacteria	p__Pseudomonadota	c__Gammaproteobacteria	o__Burkholderiales	f__Neisseriaceae	g__Kingella_B	Kingella_B oralis	Plaque
AB1051_Plaque.16	AB1108_Plaque.1	969081	Schmartz_2024	known	AB1051_Plaque	100	0.12	Gradient Boost (General Model)	11	896	974728	3.22861e+16	1857017	46	1720	10	974728	None	perfect	HQ	d__Bacteria	p__Bacillota	c__Bacilli	o__Lactobacillales	f__Aerococcaceae	g__Abiotrophia	Abiotrophia sp001815865	Plaque
AB1051_Plaque.8	GCF_001457555.1	9778	GTDB	known	AB1051_Plaque	68.01	2.52	Gradient Boost (General Model)	11	897	2817	2.46574e+16	1383570	29	1681	512	13006	None	moderate	MQ	d__Bacteria	p__Fusobacteriota	c__Fusobacteriia	o__Fusobacteriales	f__Fusobacteriaceae	g__Fusobacterium	Fusobacterium polymorphum	Plaque
AB1051_Plaque.9	GCF_000269805.1	9826	GTDB	known	AB1051_Plaque	99.85	0.26	Neural Network (Specific Model)	11	867	109180	3.44362e+16	3296720	68	2772	55	289975	None	near	HQ	d__Bacteria	p__Actinomycetota	c__Actinomycetes	o__Actinomycetales	f__Actinomycetaceae	g__Actinomyces	Actinomyces massiliensis	Plaque
AB1051_Saliva.2	GCF_014202695.1	9563	GTDB	known	AB1051_Saliva	51.29	2	Gradient Boost (General Model)	11	897	3854	3.01435e+16	1216450	45	1208	337	14191	None	moderate	MQ	d__Bacteria	p__Bacillota_A	c__Clostridia	o__Lachnospirales	f__Lachnospiraceae	g__Oribacterium	Oribacterium sinus	Saliva
AB1051_Saliva.23	GCF_000785515.1	9711	GTDB	known	AB1051_Saliva	83.17	0.05	Neural Network (Specific Model)	11	888	107037	3093403973509934	1575322	4	1510	31	222137	None	substantial	MQ	d__Bacteria	p__Bacillota	c__Bacilli	o__Lactobacillales	f__Streptococcaceae	g__Streptococcus	Streptococcus salivarius	Saliva
AB1051_Saliva.29	AB1056_Throat.16	96274	Schmartz_2024	known	AB1051_Saliva	66.16	3.86	Neural Network (Specific Model)	11	866	5492	2.47712e+16	1427831	4	1668	327	27493	None	moderate	MQ	d__Bacteria	p__Campylobacterota	c__Campylobacteria	o__Campylobacterales	f__Campylobacteraceae	g__Campylobacter_A	Campylobacter_A concisus_T	Saliva
AB1051_Saliva.38	AB1051_Saliva.26	999994	Schmartz_2024	known	AB1051_Saliva	98.39	0.37	Neural Network (Specific Model)	11	916	142569	2934782608695652	749764	43	782	6	273562	None	near	HQ	d__Bacteria	p__Patescibacteria	c__Saccharimonadia	o__Saccharimonadales	f__Nanosynbacteraceae	g__Nanosynbacter	Nanosynbacter sp900555885	Saliva
AB1052_Plaque.12	AB1052_Plaque.6	999977	Schmartz_2024	known	AB1052_Plaque	62.02	0.98	Neural Network (Specific Model)	11	895	5345	3.30902e+16	2004737	55	1810	436	24356	None	moderate	MQ	d__Bacteria	p__Bacteroidota	c__Bacteroidia	o__Bacteroidales	f__Bacteroidaceae	g__Prevotella	Prevotella baroniae	Plaque
AB1052_Plaque.27	AB1052_Saliva.3	994342	Schmartz_2024	known	AB1052_Plaque	62.71	3.29	Neural Network (Specific Model)	11	894	4729	267902124430956	1181806	42	1318	293	17804	None	moderate	MQ	d__Bacteria	p__Bacillota	c__Bacilli	o__Lactobacillales	f__Streptococcaceae	g__Streptococcus	Streptococcus mitis_BC	Plaque
AB1052_Plaque.3	AB1052_Plaque.29	999891	Schmartz_2024	known	AB1052_Plaque	88.97	0.49	Neural Network (Specific Model)	11	838	8501	2686278742374472	2043803	47	2131	337	41542	None	substantial	MQ	d__Bacteria	p__Campylobacterota	c__Campylobacteria	o__Campylobacterales	f__Campylobacteraceae	g__Campylobacter_B		Plaque
AB1052_Plaque.34	GCF_000158275.2	9758	GTDB	known	AB1052_Plaque	52.67	0.09	Neural Network (Specific Model)	11	881	8708	2.83055e+16	1167951	28	1213	192	49303	None	moderate	MQ	d__Bacteria	p__Fusobacteriota	c__Fusobacteriia	o__Fusobacteriales	f__Fusobacteriaceae	g__Fusobacterium	Fusobacterium animalis	Plaque
AB1052_Plaque.53	GCF_024181585.1	9759	GTDB	known	AB1052_Plaque	66.95	4.96	Gradient Boost (General Model)	11	91	3067	2786126287505598	2047617	5	2233	713	11885	None	moderate	MQ	d__Bacteria	p__Spirochaetota	c__Spirochaetia	o__Treponematales	f__Treponemataceae	g__Treponema_D	Treponema_D buccale	Plaque
AB1052_Plaque.64	MGYG000004316	963867	UHGG	known	AB1052_Plaque	75.19	0.7	Gradient Boost (General Model)	11	88	3736	2.45933e+16	1317488	38	1575	394	13274	None	substantial	MQ	d__Bacteria	p__Bacillota	c__Bacilli	o__Lactobacillales	f__Aerococcaceae	g__Granulicatella	Granulicatella adiacens	Plaque
AB1052_Plaque.69	AB1052_Plaque.13	100	Schmartz_2024	known	AB1052_Plaque	64.24	0.15	Neural Network (Specific Model)	11	9	64247	3.37471e+16	509749	51	454	12	127533	None	moderate	MQ	d__Bacteria	p__Patescibacteria	c__Saccharimonadia	o__Saccharimonadales	f__Nanoperiomorbaceae	g__Nanoperiomorbus		Plaque
AB1052_Plaque.70	GCF_014055025.1	9864	GTDB	known	AB1052_Plaque	70.65	0.76	Neural Network (Specific Model)	11	817	5855	2.51056e+16	1736185	61	1886	368	23972	None	substantial	MQ	d__Bacteria	p__Pseudomonadota	c__Gammaproteobacteria	o__Burkholderiales	f__Neisseriaceae	g__Neisseria	Neisseria bacilliformis	Plaque
AB1052_Plaque.71	VincentC_2016__MM024_1_megahit__bin_4	966377	Pasolli_2019	known	AB1052_Plaque	92.35	0.26	Neural Network (Specific Model)	11	887	69740	3012579908675799	1782228	39	1752	58	160916	None	near	HQ	d__Bacteria	p__Bacillota	c__Bacilli	o__Lactobacillales	f__Streptococcaceae	g__Streptococcus	Streptococcus anginosus	Plaque
AB1053_Plaque.12	GCF_900113545.1	967	GTDB	known	AB1053_Plaque	82.82	2.18	Neural Network (Specific Model)	11	852	5779	2.6229e+16	1766473	55	1914	381	27293	None	substantial	MQ	d__Bacteria	p__Pseudomonadota	c__Gammaproteobacteria	o__Burkholderiales	f__Neisseriaceae	g__Neisseria	Neisseria elongata	Plaque
AB1053_Plaque.35	AB1053_Plaque.23	999887	Schmartz_2024	known	AB1053_Plaque	54.17	1.9	Neural Network (Specific Model)	11	913	3233	2.59304e+16	1188339	58	1398	391	11034	None	moderate	MQ	d__Bacteria	p__Bacillota_C	c__Negativicutes	o__Selenomonadales	f__Selenomonadaceae	g__Centipeda	Centipeda flueggei	Plaque
AB1053_Plaque.37	CM_periimplantitis__SP_164SPT_T016__bin_4	984913	Pasolli_2019	known	AB1053_Plaque	56.4	0.79	Neural Network (Specific Model)	11	889	3563	2.72336e+16	1659480	66	1810	520	13430	None	moderate	MQ	d__Bacteria	p__Actinomycetota	c__Actinomycetes	o__Actinomycetales	f__Actinomycetaceae	g__Pauljensenia	Pauljensenia odontolytica_A	Plaque
AB1053_Plaque.52	AB1752_Throat.13	982881	Schmartz_2024	known	AB1053_Plaque	77.51	1.18	Neural Network (Specific Model)	11	817	5334	2597732836615221	1787174	47	1879	402	18625	None	substantial	MQ	d__Bacteria	p__Campylobacterota	c__Campylobacteria	o__Campylobacterales	f__Campylobacteraceae	g__Campylobacter_B		Plaque
AB1053_Saliva.38	GCF_014202695.1	965	GTDB	known	AB1053_Saliva	58.74	3.46	Gradient Boost (General Model)	11	881	3351	2.62991e+16	1238413	44	1385	395	14584	None	moderate	MQ	d__Bacteria	p__Bacillota_A	c__Clostridia	o__Lachnospirales	f__Lachnospiraceae	g__Oribacterium	Oribacterium sinus	Saliva
AB1053_Saliva.41	AB1053_Saliva.22	999982	Schmartz_2024	known	AB1053_Saliva	99.58	0	Neural Network (Specific Model)	11	862	63812	3146262341325811	1548950	36	1418	33	152357	None	near	HQ	d__Bacteria	p__Campylobacterota	c__Campylobacteria	o__Campylobacterales	f__Campylobacteraceae	g__Campylobacter_B		Saliva
AB1057_Plaque.11	GCF_001648475.1	9603	GTDB	known	AB1057_Plaque	53.48	0.09	Neural Network (Specific Model)	11	825	3795	2.49515e+16	1292382	58	1426	368	15619	None	moderate	MQ	d__Bacteria	p__Pseudomonadota	c__Gammaproteobacteria	o__Burkholderiales	f__Neisseriaceae	g__Eikenella	Eikenella halliae	Plaque
AB1057_Plaque.2	GCF_017798005.1	9564	GTDB	known	AB1057_Plaque	56.05	3.37	Neural Network (Specific Model)	11	892	4249	2589367681498829	1114020	43	1281	308	15493	None	moderate	MQ	d__Bacteria	p__Pseudomonadota	c__Gammaproteobacteria	o__Enterobacterales	f__Pasteurellaceae	g__Aggregatibacter	Aggregatibacter sp000466335	Plaque
AB1057_Plaque.34	AB1057_Plaque.37	100	Schmartz_2024	known	AB1057_Plaque	98.29	0.39	Neural Network (Specific Model)	11	855	777202	291556338028169	1014994	52	994	3	777202	None	near	HQ	d__Bacteria	p__Patescibacteria	c__Saccharimonadia	o__Saccharimonadales	f__Saccharimonadaceae	g__Saccharimonas		Plaque
AB1057_Plaque.43	HMP_2012__SRS024447__bin_42	983384	Pasolli_2019	known	AB1057_Plaque	75.75	2.3	Neural Network (Specific Model)	11	871	6541	3.01741e+16	1839676	32	1773	351	39928	None	substantial	MQ	d__Bacteria	p__Fusobacteriota	c__Fusobacteriia	o__Fusobacteriales	f__Leptotrichiaceae	g__Leptotrichia	Leptotrichia trevisanii	Plaque
AB1057_Plaque.45	GCA_013333605.2	9547	GTDB	known	AB1057_Plaque	62.34	3.53	Gradient Boost (General Model)	4	876	3354	2.62171e+16	680266	36	759	224	9541	None	moderate	MQ	d__Bacteria	p__Patescibacteria	c__JAEDAM01	o__Absconditabacterales	f__Absconditicoccaceae	g__HOT-345	HOT-345 sp013333605	Plaque
AB1057_Plaque.71	AB1121_Plaque.7	97341	Schmartz_2024	known	AB1057_Plaque	53.4	2.06	Gradient Boost (General Model)	11	816	3257	2.20461e+16	1278219	56	1579	414	13610	None	moderate	MQ	d__Bacteria	p__Pseudomonadota	c__Gammaproteobacteria	o__Burkholderiales	f__Neisseriaceae	g__Kingella_B	Kingella_B oralis	Plaque
AB1057_Plaque.77	AB1057_Plaque.34	999991	Schmartz_2024	known	AB1057_Plaque	93.47	0.09	Neural Network (Specific Model)	11	822	16370	3342812749003984	3057829	47	2510	257	69089	None	near	HQ	d__Bacteria	p__Bacteroidota	c__Bacteroidia	o__Bacteroidales	f__Bacteroidaceae	g__Prevotella	Prevotella loescheii	Plaque
AB1057_Plaque.78	GCA_013333845.2	9503	GTDB	known	AB1057_Plaque	62.46	0.21	Neural Network (Specific Model)	11	913	385621	2.90799e+16	550040	49	577	8	385621	None	moderate	MQ	d__Bacteria	p__Patescibacteria	c__Saccharimonadia	o__Saccharimonadales	f__Saccharimonadaceae	g__Saccharimonas	Saccharimonas sp013333845	Plaque
AB1057_Saliva.6	AB1335_Saliva.4	980813	Schmartz_2024	known	AB1057_Saliva	76.26	1.34	Neural Network (Specific Model)	11	89	6306	2923109826589595	1702919	41	1730	326	33703	None	substantial	MQ	d__Bacteria	p__Bacteroidota	c__Bacteroidia	o__Flavobacteriales	f__Flavobacteriaceae	g__Capnocytophaga	Capnocytophaga gingivalis	Saliva
AB1057_Saliva.9	MGYG000000318	964809	UHGG	known	AB1057_Saliva	57.15	4.01	Neural Network (Specific Model)	11	91	8401	2.72757e+16	1032561	4	1151	180	33463	None	moderate	MQ	d__Bacteria	p__Bacillota	c__Bacilli	o__Lactobacillales	f__Streptococcaceae	g__Streptococcus		Saliva
AB1059_Plaque.3	AB1703_Plaque.19	969049	Schmartz_2024	known	AB1059_Plaque	70.96	0.29	Neural Network (Specific Model)	11	896	5024	3013284275755228	1301143	48	1291	292	18717	None	substantial	MQ	d__Bacteria	p__Bacteroidota	c__Bacteroidia	o__Bacteroidales	f__Porphyromonadaceae	g__Porphyromonas	Porphyromonas endodontalis	Plaque
AB1059_Plaque.35	CM_periimplantitis__SP_143SPI_T016__bin_16	972536	Pasolli_2019	known	AB1059_Plaque	65.96	2.02	Neural Network (Specific Model)	11	877	7090	3.02253e+16	2236049	69	2165	437	33381	None	moderate	MQ	d__Bacteria	p__Actinomycetota	c__Actinomycetes	o__Actinomycetales	f__Actinomycetaceae	g__Actinomyces	Actinomyces oris_C	Plaque
AB1059_Plaque.57	MGYG000001362	986551	UHGG	known	AB1059_Plaque	62.58	4.25	Neural Network (Specific Model)	11	895	6059	2.65069e+16	1312531	39	1481	267	36797	None	moderate	MQ	d__Bacteria	p__Bacillota	c__Bacilli	o__Lactobacillales	f__Streptococcaceae	g__Streptococcus	Streptococcus anginosus	Plaque
AB1059_Plaque.73	AB1059_Plaque.20	999576	Schmartz_2024	known	AB1059_Plaque	77.59	0.67	Gradient Boost (General Model)	11	911	3854	2814109778597786	2005820	5	2168	587	16530	None	substantial	MQ	d__Bacteria	p__Spirochaetota	c__Spirochaetia	o__Treponematales	f__Treponemataceae	g__Treponema_D	Treponema_D socranskii	Plaque
AB1059_Plaque.75	AB1059_Plaque.19	999955	Schmartz_2024	known	AB1059_Plaque	50.8	2.37	Neural Network (Specific Model)	11	902	3376	2656453526697429	1337123	59	1517	413	16487	None	moderate	MQ	d__Bacteria	p__Actinomycetota	c__Actinomycetes	o__Mycobacteriales	f__Mycobacteriaceae	g__Corynebacterium	Corynebacterium matruchotii	Plaque
AB1059_Plaque.79	AB1059_Plaque.39	998894	Schmartz_2024	known	AB1059_Plaque	57.76	3.19	Neural Network (Specific Model)	11	855	3501	2.59542e+16	1760173	62	1938	546	11166	None	moderate	MQ	d__Bacteria	p__Actinomycetota	c__Coriobacteriia	o__Coriobacteriales	f__Atopobiaceae	g__Olsenella_F	Olsenella_F sp001189515	Plaque
AB1059_Saliva.21	AB1130_Saliva.3	985259	Schmartz_2024	known	AB1059_Saliva	78.2	0.27	Neural Network (Specific Model)	11	865	7698	3.12746e+16	1494169	31	1379	267	47232	None	substantial	MQ	d__Bacteria	p__Fusobacteriota	c__Fusobacteriia	o__Fusobacteriales	f__Leptotrichiaceae	g__Leptotrichia	Leptotrichia wadei_A	Saliva
AB1059_Saliva.5	GCF_000220255.1	9853	GTDB	known	AB1059_Saliva	88.29	0.96	Neural Network (Specific Model)	11	833	11726	3232857875833761	2266578	37	1949	277	49797	None	substantial	MQ	d__Bacteria	p__Bacteroidota	c__Bacteroidia	o__Bacteroidales	f__Bacteroidaceae	g__Prevotella	Prevotella pallens	Saliva
AB1059_Saliva.8	AB1221_Saliva.38	969009	Schmartz_2024	known	AB1059_Saliva	70.43	1.64	Neural Network (Specific Model)	11	887	3814	2.44069e+16	1305007	4	1582	387	17129	None	substantial	MQ	d__Bacteria	p__Pseudomonadota	c__Gammaproteobacteria	o__Enterobacterales	f__Pasteurellaceae	g__Haemophilus_D	Haemophilus_D sp927911595	Saliva
AB1060_Plaque.30	GCF_000269805.1	9903	GTDB	known	AB1060_Plaque	64.01	1.38	Neural Network (Specific Model)	11	86	7254	3.06711e+16	2182098	68	2044	397	32912	None	moderate	MQ	d__Bacteria	p__Actinomycetota	c__Actinomycetes	o__Actinomycetales	f__Actinomycetaceae	g__Actinomyces	Actinomyces massiliensis	Plaque
AB1060_Plaque.38	GCF_900113545.1	9605	GTDB	known	AB1060_Plaque	52.85	1.88	Neural Network (Specific Model)	11	851	18823	2.822e+16	1215450	53	1223	107	85631	None	moderate	MQ	d__Bacteria	p__Pseudomonadota	c__Gammaproteobacteria	o__Burkholderiales	f__Neisseriaceae	g__Neisseria	Neisseria elongata	Plaque
AB1060_Plaque.61	CM_periimplantitis__SP_344SPT_T016__bin_25	979267	Pasolli_2019	known	AB1060_Plaque	56.2	0.1	Neural Network (Specific Model)	11	927	10228	2.78867e+16	412406	45	458	57	29218	None	moderate	MQ	d__Bacteria	p__Patescibacteria	c__Saccharimonadia	o__Saccharimonadales	f__Nanosynbacteraceae	g__Nanosynbacter		Plaque
AB1060_Plaque.74	HMP_2012__SRS055378__bin_67	979623	Pasolli_2019	known	AB1060_Plaque	51.6	1.12	Neural Network (Specific Model)	11	87	3147	2695142428785607	1236893	62	1334	417	10550	None	moderate	MQ	d__Bacteria	p__Actinomycetota	c__Coriobacteriia	o__Coriobacteriales	f__Atopobiaceae	g__Olsenella_F	Olsenella_F sp001189515	Plaque
AB1060_Plaque.9	GCF_001274535.1	9821	GTDB	known	AB1060_Plaque	68.26	1.1	Neural Network (Specific Model)	11	899	4235	2.68076e+16	1414225	32	1584	386	16086	None	moderate	MQ	d__Bacteria	p__Fusobacteriota	c__Fusobacteriia	o__Fusobacteriales	f__Leptotrichiaceae	g__Leptotrichia_A	Leptotrichia_A sp001274535	Plaque
AB1061_Plaque.14	GCF_002238115.1	9547	GTDB	known	AB1061_Plaque	53.52	4.65	Neural Network (Specific Model)	11	899	4998	2757103274559194	1093490	41	1191	270	30841	None	moderate	MQ	d__Bacteria	p__Bacillota	c__Bacilli	o__Lactobacillales	f__Streptococcaceae	g__Streptococcus	Streptococcus sp002238115	Plaque
AB1061_Plaque.15	AB1061_Plaque.10	999956	Schmartz_2024	known	AB1061_Plaque	81.05	0.4	Neural Network (Specific Model)	11	904	7701	2.74086e+16	736908	54	812	117	22770	None	substantial	MQ	d__Bacteria	p__Patescibacteria	c__Saccharimonadia	o__Saccharimonadales	f__UBA10027	g__SDRW01	SDRW01 sp916438855	Plaque
AB1061_Plaque.16	AB1061_Plaque.19	999989	Schmartz_2024	known	AB1061_Plaque	99.93	0.2	Neural Network (Specific Model)	11	917	906994	2.90871e+16	906994	51	956	1	906994	None	near	HQ	d__Bacteria	p__Patescibacteria	c__Saccharimonadia	o__Saccharimonadales	f__Nanosynbacteraceae	g__Nanosynbacter	Nanosynbacter sp010202115	Plaque
AB1061_Plaque.21	AB1789_Plaque.36	978775	Schmartz_2024	known	AB1061_Plaque	99.88	1.41	Neural Network (Specific Model)	11	898	29673	3050860344137655	2542761	4	2499	144	101961	None	near	HQ	d__Bacteria	p__Bacteroidota	c__Bacteroidia	o__Flavobacteriales	f__Flavobacteriaceae	g__Capnocytophaga	Capnocytophaga gingivalis	Plaque
AB1061_Plaque.3	GCF_000413475.1	9853	GTDB	known	AB1061_Plaque	100	0.21	Neural Network (Specific Model)	11	887	308968	3.01517e+16	1929598	38	1896	14	410454	None	perfect	HQ	d__Bacteria	p__Bacillota	c__Bacilli	o__Lactobacillales	f__Streptococcaceae	g__Streptococcus	Streptococcus intermedius	Plaque
AB1061_Plaque.35	AB1106_Plaque.13	958641	Schmartz_2024	known	AB1061_Plaque	90.1	3.46	Gradient Boost (General Model)	11	894	7652	2.77018e+16	2053163	6	2211	366	48164	None	near	HQ	d__Bacteria	p__Pseudomonadota	c__Gammaproteobacteria	o__Cardiobacteriales	f__Cardiobacteriaceae	g__Cardiobacterium	Cardiobacterium hominis	Plaque
AB1061_Plaque.4	GCF_030408675.1	9821	GTDB	known	AB1061_Plaque	78.85	0.93	Neural Network (Specific Model)	11	902	4931	2.67143e+16	2170172	57	2451	524	18212	None	substantial	MQ	d__Bacteria	p__Actinomycetota	c__Actinomycetes	o__Mycobacteriales	f__Mycobacteriaceae	g__Corynebacterium	Corynebacterium durum	Plaque
AB1061_Plaque.42	GCA_938017765.1	9857	GTDB	known	AB1061_Plaque	87.27	1.39	Neural Network (Specific Model)	11	874	30579	3.18321e+16	1739513	32	1593	98	92970	None	substantial	MQ	d__Bacteria	p__Fusobacteriota	c__Fusobacteriia	o__Fusobacteriales	f__Leptotrichiaceae	g__Pseudoleptotrichia	Pseudoleptotrichia sp938017765	Plaque
AB1061_Saliva.28	AB1110_Throat.1	977508	Schmartz_2024	known	AB1061_Saliva	70.8	1.41	Neural Network (Specific Model)	11	864	9146	2825348837209302	1390000	29	1419	210	64258	None	substantial	MQ	d__Bacteria	p__Bacillota	c__Bacilli	o__Staphylococcales	f__Gemellaceae	g__Gemella	Gemella sanguinis	Saliva
AB1061_Saliva.30	AB1061_Saliva.9	999702	Schmartz_2024	known	AB1061_Saliva	53.61	0.31	Gradient Boost (General Model)	11	882	3523	2614972105997211	1272408	43	1434	389	12078	None	moderate	MQ	d__Bacteria	p__Bacillota_A	c__Clostridia	o__Lachnospirales	f__Lachnospiraceae	g__Oribacterium		Saliva
AB1061_Saliva.36	AB1255_Saliva.8	974685	Schmartz_2024	known	AB1061_Saliva	92.79	0.12	Neural Network (Specific Model)	11	867	18060	3505946893787575	2417156	38	1996	206	115501	None	near	HQ	d__Bacteria	p__Bacteroidota	c__Bacteroidia	o__Bacteroidales	f__Bacteroidaceae	g__Prevotella	Prevotella nanceiensis	Saliva
AB1061_Saliva.40	AB1061_Saliva.2	999984	Schmartz_2024	known	AB1061_Saliva	57.35	0.88	Neural Network (Specific Model)	11	919	5773	2603002207505519	383880	43	453	78	12506	None	moderate	MQ	d__Bacteria	p__Patescibacteria	c__Saccharimonadia	o__Saccharimonadales	f__Nanosynbacteraceae	g__Nanosynbacter		Saliva
AB1061_Saliva.57	GCA_927911475.1	950	GTDB	known	AB1061_Saliva	53.68	2.37	Gradient Boost (General Model)	11	918	4142	2664683009298394	1028326	37	1183	272	19825	None	moderate	MQ	d__Bacteria	p__Bacillota_I	c__Bacilli_A	o__Erysipelotrichales	f__Erysipelotrichaceae	g__Bulleidia	Bulleidia sp927911475	Saliva
AB1064_Plaque.37	AB1470_Plaque.14	977489	Schmartz_2024	known	AB1064_Plaque	60.12	0.06	Neural Network (Specific Model)	11	931	7563	2664535714285714	479208	48	560	83	23674	None	moderate	MQ	d__Bacteria	p__Patescibacteria	c__Saccharimonadia	o__Saccharimonadales	f__Nanosynbacteraceae	g__Nanosynbacter		Plaque
AB1064_Plaque.48	CM_periimplantitis__SP_161SPI_T016__bin_27	955806	Pasolli_2019	known	AB1064_Plaque	76.9	0.12	Neural Network (Specific Model)	11	896	25985	3086423969072165	1601730	43	1552	97	64549	None	substantial	MQ	d__Bacteria	p__Bacillota	c__Bacilli	o__Lactobacillales	f__Streptococcaceae	g__Streptococcus	Streptococcus parasanguinis_B	Plaque
AB1064_Plaque.49	AB1064_Plaque.16	99999	Schmartz_2024	known	AB1064_Plaque	91.51	1.51	Gradient Boost (General Model)	11	906	12204	2879721274175199	1670714	45	1758	190	57377	None	near	HQ	d__Bacteria	p__Bacillota_I	c__Bacilli_A	o__Erysipelotrichales	f__Erysipelotrichaceae	g__Bulleidia		Plaque
AB1064_Plaque.64	AB837_Saliva.24	978916	Schmartz_2024	known	AB1064_Plaque	55.72	1.96	Neural Network (Specific Model)	11	873	3140	2627318718381113	1069053	31	1186	364	12012	None	moderate	MQ	d__Bacteria	p__Fusobacteriota	c__Fusobacteriia	o__Fusobacteriales	f__Leptotrichiaceae	g__Leptotrichia	Leptotrichia wadei	Plaque
AB1064_Plaque.66	GCF_000686605.1	993	GTDB	known	AB1064_Plaque	95.92	0.12	Neural Network (Specific Model)	11	832	77820	2956525116519938	2053824	44	1931	40	233720	None	near	HQ	d__Bacteria	p__Bacillota	c__Bacilli	o__Lactobacillales	f__Streptococcaceae	g__Streptococcus	Streptococcus sobrinus	Plaque
AB1064_Saliva.16	GCF_001434365.1	9976	GTDB	known	AB1064_Saliva	99.96	1	Neural Network (Specific Model)	11	908	42480	3.03915e+16	1741739	42	1738	65	119162	None	near	HQ	d__Bacteria	p__Bacillota	c__Bacilli	o__Lactobacillales	f__Lactobacillaceae	g__Limosilactobacillus	Limosilactobacillus gastricus	Saliva
AB1064_Saliva.18	AB1171_Throat.17	992834	Schmartz_2024	known	AB1064_Saliva	88.93	0.9	Neural Network (Specific Model)	11	863	26390	3.40045e+16	1623325	48	1374	99	121985	None	substantial	MQ	d__Bacteria	p__Actinomycetota	c__Actinomycetes	o__Actinomycetales	f__Bifidobacteriaceae	g__Alloscardovia		Saliva
AB1064_Saliva.20	GCA_024330325.1	9831	GTDB	known	AB1064_Saliva	99.11	0.28	Neural Network (Specific Model)	11	92	732600	2973025099075297	732600	43	757	1	732600	None	near	HQ	d__Bacteria	p__Patescibacteria	c__Saccharimonadia	o__Saccharimonadales	f__Nanosynbacteraceae	g__Nanosynbacter	Nanosynbacter sp024330325	Saliva
AB1064_Saliva.41	GCA_900556405.1	976	GTDB	known	AB1064_Saliva	77.55	2.1	Neural Network (Specific Model)	11	883	8974	3179086834733894	1924304	66	1785	306	37218	None	substantial	MQ	d__Bacteria	p__Actinomycetota	c__Actinomycetes	o__Actinomycetales	f__Actinomycetaceae	g__Pauljensenia	Pauljensenia sp900556405	Saliva
AB1065_Plaque.28	GCF_013343115.1	9804	GTDB	known	AB1065_Plaque	96.11	0.73	Neural Network (Specific Model)	11	895	98384	3057272309107636	2223639	43	2174	33	369378	None	near	HQ	d__Bacteria	p__Bacillota	c__Bacilli	o__Lactobacillales	f__Streptococcaceae	g__Streptococcus	Streptococcus sanguinis_H	Plaque
AB1065_Plaque.38	CM_periimplantitis__SP_125SPI_T016__bin_4	981777	Pasolli_2019	known	AB1065_Plaque	68.02	0.13	Neural Network (Specific Model)	11	892	152550	3255223642172524	1368980	43	1252	9	442816	None	moderate	MQ	d__Bacteria	p__Bacteroidota	c__Bacteroidia	o__Bacteroidales	f__Paludibacteraceae	g__F0058	F0058 sp000163695	Plaque
AB1065_Plaque.46	AB1049_Plaque.46	95165	Schmartz_2024	known	AB1065_Plaque	79.29	0.31	Neural Network (Specific Model)	11	922	71808	3089327485380117	685965	48	684	15	131017	None	substantial	MQ	d__Bacteria	p__Patescibacteria	c__Saccharimonadia	o__Saccharimonadales	f__Saccharimonadaceae	g__Saccharimonas		Plaque
AB1065_Plaque.7	GCF_000482505.1	9769	GTDB	known	AB1065_Plaque	51.19	2.94	Neural Network (Specific Model)	11	882	2526	256726986624705	1108856	32	1271	440	13395	None	moderate	MQ	d__Bacteria	p__Fusobacteriota	c__Fusobacteriia	o__Fusobacteriales	f__Leptotrichiaceae	g__Leptotrichia	Leptotrichia trevisanii	Plaque
AB1065_Saliva.12	GCA_916720335.1	9792	GTDB	known	AB1065_Saliva	98.86	0	Neural Network (Specific Model)	11	89	172851	3.2231e+16	1850804	38	1706	17	335358	None	near	HQ	d__Bacteria	p__Pseudomonadota	c__Gammaproteobacteria	o__Pseudomonadales	f__Moraxellaceae	g__Moraxella	Moraxella sp916720335	Saliva
AB1065_Saliva.14	GCF_000238795.1	9809	GTDB	known	AB1065_Saliva	54.31	0.46	Gradient Boost (General Model)	11	902	2905	2.35919e+16	905482	4	1156	321	8949	None	moderate	MQ	d__Bacteria	p__Pseudomonadota	c__Gammaproteobacteria	o__Enterobacterales	f__Pasteurellaceae	g__Haemophilus_A	Haemophilus_A sputorum	Saliva
AB1065_Saliva.18	AB1482_Saliva.22	974942	Schmartz_2024	known	AB1065_Saliva	68.48	1.04	Neural Network (Specific Model)	11	897	7930	3056884862653419	1746501	66	1711	306	45498	None	moderate	MQ	d__Bacteria	p__Actinomycetota	c__Actinomycetes	o__Actinomycetales	f__Actinomycetaceae	g__Pauljensenia		Saliva
AB1065_Saliva.29	AB1392_Throat.37	983712	Schmartz_2024	known	AB1065_Saliva	98.5	0.34	Gradient Boost (General Model)	11	876	21859	3.19515e+16	1624629	38	1486	109	73140	None	near	HQ	d__Bacteria	p__Bacillota_A	c__Clostridia	o__Peptostreptococcales	f__Peptostreptococcaceae	g__Peptostreptococcus	Peptostreptococcus sp900759325	Saliva
AB1065_Saliva.33	AB1065_Saliva.8	999662	Schmartz_2024	known	AB1065_Saliva	62.52	2.06	Gradient Boost (General Model)	11	897	3681	2.5466e+16	1076573	37	1267	324	12009	None	moderate	MQ	d__Bacteria	p__Bacillota_I	c__Bacilli_A	o__Erysipelotrichales	f__Erysipelotrichaceae	g__Bulleidia	Bulleidia sp927911475	Saliva
AB1065_Saliva.36	AB1398_Saliva.12	976852	Schmartz_2024	known	AB1065_Saliva	58.82	1.59	Neural Network (Specific Model)	11	918	4488	250475763016158	455045	44	557	121	12649	None	moderate	MQ	d__Bacteria	p__Patescibacteria	c__Saccharimonadia	o__Saccharimonadales	f__Nanosynbacteraceae	g__Nanosynbacter	Nanosynbacter sp900555425	Saliva
AB1065_Saliva.46	MGYG000000112	991082	UHGG	known	AB1065_Saliva	50.8	1.8	Neural Network (Specific Model)	11	874	2514	2608158328752062	1626015	69	1819	657	10427	None	moderate	MQ	d__Bacteria	p__Actinomycetota	c__Actinomycetes	o__Actinomycetales	f__Actinomycetaceae	g__Actinomyces	Actinomyces sp900323545	Saliva
AB1068_Plaque.11	AB1720_Plaque.12	98529	Schmartz_2024	known	AB1068_Plaque	90.5	2.93	Gradient Boost (General Model)	11	913	14458	2891568955890564	1698373	37	1791	162	53210	None	near	HQ	d__Bacteria	p__Bacillota_I	c__Bacilli_A	o__Erysipelotrichales	f__Erysipelotrichaceae	g__Bulleidia	Bulleidia moorei	Plaque
AB1068_Plaque.49	GCA_013333625.2	9508	GTDB	known	AB1068_Plaque	94.28	0.48	Neural Network (Specific Model)	11	917	764303	3.11402e+16	851840	48	838	2	764303	None	near	HQ	d__Bacteria	p__Patescibacteria	c__Saccharimonadia	o__Saccharimonadales	f__Saccharimonadaceae	g__Saccharimonas	Saccharimonas sp013333625	Plaque
AB1068_Saliva.15	AB1047_Forehead.4	974804	Schmartz_2024	known	AB1068_Saliva	99.53	0.34	Neural Network (Specific Model)	11	887	174080	3573680473372781	2039923	58	1690	19	400050	None	near	HQ	d__Bacteria	p__Actinomycetota	c__Actinomycetes	o__Actinomycetales	f__Actinomycetaceae	g__Actinomyces	Actinomyces graevenitzii	Saliva
AB1068_Saliva.19	GCF_000194945.1	9546	GTDB	known	AB1068_Saliva	65.11	4.29	Neural Network (Specific Model)	11	899	4585	2564675395526459	1565605	44	1833	389	24501	None	moderate	MQ	d__Bacteria	p__Bacillota	c__Bacilli	o__Lactobacillales	f__Streptococcaceae	g__Streptococcus	Streptococcus sanguinis	Saliva
AB1068_Saliva.2	GCF_900128465.1	9866	GTDB	known	AB1068_Saliva	53.05	0.23	Neural Network (Specific Model)	11	888	5204	2986870897155361	1379964	64	1371	321	15178	None	moderate	MQ	d__Bacteria	p__Actinomycetota	c__Actinomycetes	o__Actinomycetales	f__Actinomycetaceae	g__Pauljensenia	Pauljensenia bouchesdurhonensis	Saliva
AB1068_Saliva.33	AB1315_Throat.13	976015	Schmartz_2024	known	AB1068_Saliva	61.15	3.43	Gradient Boost (General Model)	11	908	3651	2.75607e+16	1387184	46	1526	421	13038	None	moderate	MQ	d__Bacteria	p__Bacillota_A	c__Clostridia	o__Lachnospirales	f__Lachnospiraceae	g__Oribacterium	Oribacterium sp015258095	Saliva
AB1068_Saliva.36	GCF_030371665.1	9781	GTDB	known	AB1068_Saliva	66.25	0.54	Neural Network (Specific Model)	11	885	2892	2.84536e+16	1840694	7	1910	659	11971	None	moderate	MQ	d__Bacteria	p__Actinomycetota	c__Actinomycetes	o__Actinomycetales	f__Actinomycetaceae	g__Actinomyces	Actinomyces sp915069725	Saliva
AB1068_Saliva.44	MGYG000002635	979003	UHGG	known	AB1068_Saliva	97.13	0.38	Neural Network (Specific Model)	11	854	26915	302849857006673	2228525	3	2098	165	105854	None	near	HQ	d__Bacteria	p__Fusobacteriota	c__Fusobacteriia	o__Fusobacteriales	f__Leptotrichiaceae	g__Leptotrichia	Leptotrichia wadei_A	Saliva
AB1068_Saliva.51	GCF_015256775.1	9634	GTDB	known	AB1068_Saliva	54.48	3.37	Gradient Boost (General Model)	11	915	3666	2585909752547307	1162778	37	1374	358	20170	None	moderate	MQ	d__Bacteria	p__Bacillota_I	c__Bacilli_A	o__Erysipelotrichales	f__Erysipelotrichaceae	g__Bulleidia	Bulleidia sp015256775	Saliva
AB1073_Plaque.10	AB1036_Plaque.12	986902	Schmartz_2024	known	AB1073_Plaque	61.53	0.44	Neural Network (Specific Model)	11	905	4816	2870414746543779	824509	46	868	195	13603	None	moderate	MQ	d__Bacteria	p__Actinomycetota	c__Coriobacteriia	o__Coriobacteriales	f__Atopobiaceae	g__Lancefieldella	Lancefieldella parvula	Plaque
AB1073_Plaque.12	AB1073_Plaque.34	999975	Schmartz_2024	known	AB1073_Plaque	55	1.16	Neural Network (Specific Model)	11	903	2713	2377	339001	35	430	125	6962	None	moderate	MQ	d__Bacteria	p__Patescibacteria	c__Saccharimonadia	o__Saccharimonadales	f__Nanogingivalaceae	g__Nanogingivalis	Nanogingivalis sp938030735	Plaque
AB1073_Plaque.14	GCF_001679045.1	9537	GTDB	known	AB1073_Plaque	55.4	1.82	Neural Network (Specific Model)	11	903	2919	2.42161e+16	990651	38	1233	346	10572	None	moderate	MQ	d__Bacteria	p__Pseudomonadota	c__Gammaproteobacteria	o__Enterobacterales	f__Pasteurellaceae	g__Haemophilus	Haemophilus haemolyticus	Plaque
AB1073_Plaque.17	AB1073_Plaque.28	999833	Schmartz_2024	known	AB1073_Plaque	69.09	0.58	Neural Network (Specific Model)	11	841	3860	2.54349e+16	1450537	48	1603	408	19191	None	moderate	MQ	d__Bacteria	p__Campylobacterota	c__Campylobacteria	o__Campylobacterales	f__Campylobacteraceae	g__Campylobacter_B	Campylobacter_B sp937997405	Plaque
AB1073_Plaque.25	AB1073_Plaque.29	999986	Schmartz_2024	known	AB1073_Plaque	58.23	1.31	Neural Network (Specific Model)	11	88	3530	2959043103448276	1168899	63	1160	360	16182	None	moderate	MQ	d__Bacteria	p__Bacteroidota	c__Bacteroidia	o__Bacteroidales	f__Porphyromonadaceae	g__Porphyromonas	Porphyromonas sp018127745	Plaque
AB1073_Plaque.39	AB1729_Plaque.7	960877	Schmartz_2024	known	AB1073_Plaque	83.92	4.84	Neural Network (Specific Model)	11	893	22686	3074300151591713	2042406	42	1979	160	77848	None	substantial	MQ	d__Bacteria	p__Pseudomonadota	c__Gammaproteobacteria	o__Enterobacterales	f__Pasteurellaceae	g__Aggregatibacter	Aggregatibacter aphrophilus	Plaque
AB1073_Plaque.42	HMP_2012__SRS011255__bin_1	957843	Pasolli_2019	known	AB1073_Plaque	99.85	0.29	Neural Network (Specific Model)	11	86	320171	2871717369970559	1018114	52	1019	5	325537	None	near	HQ	d__Bacteria	p__Patescibacteria	c__Saccharimonadia	o__Saccharimonadales	f__Saccharimonadaceae	g__Saccharimonas	Saccharimonas sp938036845	Plaque
AB1073_Plaque.48	AB1295_Plaque.37	975298	Schmartz_2024	known	AB1073_Plaque	82.84	1.46	Neural Network (Specific Model)	11	85	5325	281932480141218	2251340	62	2266	480	19196	None	substantial	MQ	d__Bacteria	p__Actinomycetota	c__Coriobacteriia	o__Coriobacteriales	f__Atopobiaceae	g__Olsenella_F	Olsenella_F sp001189515	Plaque
AB1073_Plaque.59	HMP_2012__SRS043772__bin_22	953148	Pasolli_2019	known	AB1073_Plaque	71.11	4.78	Neural Network (Specific Model)	11	882	14975	2.86625e+16	1544459	43	1586	175	45846	None	substantial	MQ	d__Bacteria	p__Pseudomonadota	c__Gammaproteobacteria	o__Enterobacterales	f__Pasteurellaceae	g__Aggregatibacter		Plaque
AB1073_Plaque.6	GCF_900637725.1	9831	GTDB	known	AB1073_Plaque	57.03	0.47	Neural Network (Specific Model)	11	897	5035	2823816425120773	1754605	68	1863	426	22743	None	moderate	MQ	d__Bacteria	p__Actinomycetota	c__Actinomycetes	o__Propionibacteriales	f__Propionibacteriaceae	g__Arachnia	Arachnia propionica	Plaque
AB1073_Plaque.68	GCA_007845485.1	9769	GTDB	known	AB1073_Plaque	88.88	0	Neural Network (Specific Model)	11	914	176558	3109715142428786	679407	38	667	6	207214	None	substantial	MQ	d__Bacteria	p__Patescibacteria	c__Saccharimonadia	o__Saccharimonadales	f__UBA10027	g__SDRW01	SDRW01 sp007845485	Plaque
AB1073_Plaque.74	CM_periimplantitis__SP_344SPT_T016__bin_28	976733	Pasolli_2019	known	AB1073_Plaque	52.82	1.48	Neural Network (Specific Model)	11	891	7012	3.13715e+16	1666614	69	1581	305	35927	None	moderate	MQ	d__Bacteria	p__Actinomycetota	c__Actinomycetes	o__Actinomycetales	f__Actinomycetaceae	g__Actinomyces	Actinomyces naeslundii	Plaque
AB1073_Saliva.15	GCF_000165735.1	9826	GTDB	known	AB1073_Saliva	99.7	0.04	Neural Network (Specific Model)	11	904	170710	3194486279514997	1658992	45	1567	15	312780	None	near	HQ	d__Bacteria	p__Bacillota_C	c__Negativicutes	o__Veillonellales	f__Megasphaeraceae	g__Anaeroglobus	Anaeroglobus micronuciformis	Saliva
AB1073_Saliva.48	AB1458_Throat.21	963137	Schmartz_2024	known	AB1073_Saliva	62.41	4.66	Gradient Boost (General Model)	11	916	3181	2555131086142322	1560835	38	1869	529	11844	None	moderate	MQ	d__Bacteria	p__Bacillota_A	c__Clostridia	o__Lachnospirales	f__Lachnospiraceae	g__Lachnoanaerobaculum	Lachnoanaerobaculum sp938015485	Saliva
AB1073_Saliva.56	AB1635_Saliva.20	967176	Schmartz_2024	known	AB1073_Saliva	75.99	2	Neural Network (Specific Model)	11	912	6595	2.84444e+16	1715950	59	1837	336	19835	None	substantial	MQ	d__Bacteria	p__Bacillota_C	c__Negativicutes	o__Selenomonadales	f__Selenomonadaceae	g__Centipeda	Centipeda sp015265235	Saliva
AB1073_Saliva.57	AB1292_Saliva.2	981433	Schmartz_2024	known	AB1073_Saliva	84.2	0.06	Neural Network (Specific Model)	11	878	73947	3237888540031397	1407958	44	1274	37	162061	None	substantial	MQ	d__Bacteria	p__Bacillota_C	c__Negativicutes	o__Veillonellales	f__Veillonellaceae	g__Veillonella	Veillonella sp900550455	Saliva
AB1073_Saliva.60	GCF_001064145.1	9889	GTDB	known	AB1073_Saliva	91.53	0.92	Neural Network (Specific Model)	11	89	37314	3425578489951113	2122132	66	1841	111	116521	None	near	HQ	d__Bacteria	p__Actinomycetota	c__Actinomycetes	o__Actinomycetales	f__Actinomycetaceae	g__Pauljensenia	Pauljensenia sp001064145	Saliva
AB1088_Plaque.16	AB1088_Plaque.15	999995	Schmartz_2024	known	AB1088_Plaque	54.17	3.37	Neural Network (Specific Model)	11	895	101010	2.99865e+16	1118671	41	1115	17	213279	None	moderate	MQ	d__Bacteria	p__Bacillota	c__Bacilli	o__Lactobacillales	f__Streptococcaceae	g__Streptococcus		Plaque
AB1088_Plaque.17	AB837_Saliva.21	970728	Schmartz_2024	known	AB1088_Plaque	99.55	0.08	Neural Network (Specific Model)	11	895	49922	3208195521102498	2492387	42	2322	82	152769	None	near	HQ	d__Bacteria	p__Bacteroidota	c__Bacteroidia	o__Flavobacteriales	f__Flavobacteriaceae	g__Capnocytophaga	Capnocytophaga granulosa	Plaque
AB1088_Plaque.2	GCA_018127705.1	9779	GTDB	known	AB1088_Plaque	97.69	0.93	Neural Network (Specific Model)	11	865	31943	2873972310969116	934005	47	939	47	86380	None	near	HQ	d__Bacteria	p__Patescibacteria	c__Saccharimonadia	o__Saccharimonadales	f__Saccharimonadaceae	g__Saccharimonas	Saccharimonas sp018127705	Plaque
AB1088_Plaque.53	CM_periimplantitis__SP_287SPT_T016__bin_27	988428	Pasolli_2019	known	AB1088_Plaque	78.27	0.14	Neural Network (Specific Model)	11	836	27035	326421618204804	1849869	48	1582	98	121318	None	substantial	MQ	d__Bacteria	p__Bacteroidota	c__Bacteroidia	o__Bacteroidales	f__Bacteroidaceae	g__Alloprevotella	Alloprevotella tannerae	Plaque
AB1088_Saliva.10	GCA_018369675.1	9628	GTDB	known	AB1088_Saliva	51.58	3.57	Neural Network (Specific Model)	11	86	3375	2399772565742715	1176687	4	1407	364	33992	None	moderate	MQ	d__Bacteria	p__Pseudomonadota	c__Gammaproteobacteria	o__Enterobacterales	f__Pasteurellaceae	g__Haemophilus_D	Haemophilus_D parainfluenzae_AC	Saliva
AB1088_Saliva.11	AB1088_Saliva.8	999657	Schmartz_2024	known	AB1088_Saliva	67.13	0.39	Neural Network (Specific Model)	11	866	3481	2450116482236459	1455199	5	1717	437	18480	None	moderate	MQ	d__Bacteria	p__Pseudomonadota	c__Gammaproteobacteria	o__Burkholderiales	f__Neisseriaceae	g__Neisseria	Neisseria sp000186165	Saliva
AB1089_Plaque.14	HMP_2012__SRS015278__bin_26	976373	Pasolli_2019	known	AB1089_Plaque	71.48	0.86	Neural Network (Specific Model)	11	863	11900	2899012753897024	2129189	57	2117	240	45907	None	substantial	MQ	d__Bacteria	p__Actinomycetota	c__Actinomycetes	o__Mycobacteriales	f__Mycobacteriaceae	g__Corynebacterium	Corynebacterium matruchotii	Plaque
AB1089_Plaque.15	HMP_2012__SRS014476__bin_25	974609	Pasolli_2019	known	AB1089_Plaque	88.32	0.79	Neural Network (Specific Model)	11	909	12268	2957830059387848	2133881	42	2189	248	45038	None	substantial	MQ	d__Bacteria	p__Bacteroidota	c__Bacteroidia	o__Flavobacteriales	f__Flavobacteriaceae	g__Capnocytophaga	Capnocytophaga sp915070235	Plaque
AB1089_Plaque.23	AB1089_Plaque.12	999911	Schmartz_2024	known	AB1089_Plaque	92.06	0.53	Neural Network (Specific Model)	11	835	18023	2.80368e+16	2029567	47	2020	179	99176	None	near	HQ	d__Bacteria	p__Campylobacterota	c__Campylobacteria	o__Campylobacterales	f__Campylobacteraceae	g__Campylobacter_B		Plaque
AB1089_Plaque.26	GCA_905371865.1	9867	GTDB	known	AB1089_Plaque	79.44	1.9	Gradient Boost (General Model)	11	831	6569	2.55351e+16	1647876	37	1791	320	41729	None	substantial	MQ	d__Bacteria	p__Bacillota	c__Bacilli	o__Lactobacillales	f__Aerococcaceae	g__Granulicatella	Granulicatella sp905371865	Plaque
AB1089_Plaque.48	GCF_003943655.1	9845	GTDB	known	AB1089_Plaque	69.52	0.72	Neural Network (Specific Model)	11	864	13957	2821957013574661	1729892	44	1768	206	40503	None	moderate	MQ	d__Bacteria	p__Bacillota	c__Bacilli	o__Lactobacillales	f__Streptococcaceae	g__Streptococcus	Streptococcus sanguinis_F	Plaque
AB1089_Plaque.8	GCF_024584435.1	9821	GTDB	known	AB1089_Plaque	68.11	3.43	Gradient Boost (General Model)	11	898	3381	2661223849372385	1695568	67	1912	542	15587	None	moderate	MQ	d__Bacteria	p__Actinomycetota	c__Actinomycetes	o__Actinomycetales	f__Actinomycetaceae	g__Pauljensenia	Pauljensenia sp000185285	Plaque
AB1089_Plaque.9	AB1089_Plaque.26	999643	Schmartz_2024	known	AB1089_Plaque	62.89	1.97	Neural Network (Specific Model)	11	885	3380	2733764078245406	1560646	4	1687	507	9117	None	moderate	MQ	d__Bacteria	p__Bacteroidota	c__Bacteroidia	o__Flavobacteriales	f__Flavobacteriaceae	g__Capnocytophaga	Capnocytophaga ochracea	Plaque
AB1089_Saliva.43	AB1266_Plaque.3	976645	Schmartz_2024	known	AB1089_Saliva	57.14	0.01	Gradient Boost (General Model)	11	911	3456	2.53711e+16	360227	38	432	112	8382	None	moderate	MQ	d__Bacteria	p__Patescibacteria	c__Saccharimonadia	o__Saccharimonadales	f__UBA10027	g__SDRW01	SDRW01 sp007845485	Saliva
AB1089_Saliva.51	GCF_013393365.1	9635	GTDB	known	AB1089_Saliva	54.99	4.37	Neural Network (Specific Model)	11	875	6136	2747820895522388	1259813	38	1340	258	23146	None	moderate	MQ	d__Bacteria	p__Bacillota_C	c__Negativicutes	o__Veillonellales	f__Veillonellaceae	g__Veillonella	Veillonella nakazawae	Saliva
AB1089_Saliva.6	AB1089_Saliva.1	999515	Schmartz_2024	known	AB1089_Saliva	50.75	0.43	Gradient Boost (General Model)	11	906	3461	2.53047e+16	1322375	61	1582	414	16362	None	moderate	MQ	d__Bacteria	p__Pseudomonadota	c__Gammaproteobacteria	o__Cardiobacteriales	f__Cardiobacteriaceae	g__Cardiobacterium	Cardiobacterium hominis	Saliva
AB1089_Saliva.7	HMP_2012__SRS018791__bin_48	977991	Pasolli_2019	known	AB1089_Saliva	65.66	0.94	Neural Network (Specific Model)	11	864	2841	2.49205e+16	1373063	31	1589	493	15614	None	moderate	MQ	d__Bacteria	p__Fusobacteriota	c__Fusobacteriia	o__Fusobacteriales	f__Leptotrichiaceae	g__Leptotrichia	Leptotrichia wadei_A	Saliva
AB1091_Plaque.9	GCF_000269805.1	9883	GTDB	known	AB1091_Plaque	58.4	1.67	Neural Network (Specific Model)	11	866	4653	2728902532617038	2458766	68	2606	613	22293	None	moderate	MQ	d__Bacteria	p__Actinomycetota	c__Actinomycetes	o__Actinomycetales	f__Actinomycetaceae	g__Actinomyces	Actinomyces massiliensis	Plaque
AB1091_Saliva.4	GCF_000785515.1	9691	GTDB	known	AB1091_Saliva	53.34	0.93	Neural Network (Specific Model)	11	854	8763	2779892933618844	910226	41	934	136	37954	None	moderate	MQ	d__Bacteria	p__Bacillota	c__Bacilli	o__Lactobacillales	f__Streptococcaceae	g__Streptococcus	Streptococcus salivarius	Saliva
AB1093_Plaque.24	MGYG000001347	978162	UHGG	known	AB1093_Plaque	99	4.39	Neural Network (Specific Model)	11	904	14544	2889363382899628	2060121	27	2152	274	65260	None	near	HQ	d__Bacteria	p__Fusobacteriota	c__Fusobacteriia	o__Fusobacteriales	f__Fusobacteriaceae	g__Fusobacterium	Fusobacterium vincentii	Plaque
AB1093_Plaque.28	AB1093_Plaque.16	100	Schmartz_2024	known	AB1093_Plaque	99.83	0.12	Neural Network (Specific Model)	11	918	532009	2989765258215962	830081	51	852	4	532009	None	near	HQ	d__Bacteria	p__Patescibacteria	c__Saccharimonadia	o__Saccharimonadales	f__Nanosynbacteraceae	g__Nanosynbacter		Plaque
AB1093_Plaque.30	AB1093_Plaque.14	999797	Schmartz_2024	known	AB1093_Plaque	62.7	2.87	Neural Network (Specific Model)	11	812	4060	2405600233100233	1521621	48	1716	429	19313	None	moderate	MQ	d__Bacteria	p__Campylobacterota	c__Campylobacteria	o__Campylobacterales	f__Campylobacteraceae	g__Campylobacter_B		Plaque
AB1093_Plaque.31	AB1093_Plaque.18	999753	Schmartz_2024	known	AB1093_Plaque	72.53	0.28	Neural Network (Specific Model)	11	9	3101	2.38534e+16	1382138	32	1742	473	11239	None	substantial	MQ	d__Bacteria	p__Fusobacteriota	c__Fusobacteriia	o__Fusobacteriales	f__Leptotrichiaceae	g__Pseudoleptotrichia	Pseudoleptotrichia goodfellowii	Plaque
AB1093_Saliva.2	AB1093_Saliva.10	999999	Schmartz_2024	known	AB1093_Saliva	100	0	Neural Network (Specific Model)	11	912	165270	3.23845e+16	1851282	4	1740	15	356294	None	perfect	HQ	d__Bacteria	p__Pseudomonadota	c__Gammaproteobacteria	o__Enterobacterales	f__Pasteurellaceae	g__Haemophilus_D		Saliva
AB1093_Saliva.7	AB1093_Saliva.11	99999	Schmartz_2024	known	AB1093_Saliva	56.27	0.47	Neural Network (Specific Model)	11	878	4895	3.23826e+16	1219581	57	1104	280	21571	None	moderate	MQ	d__Bacteria	p__Bacteroidota	c__Bacteroidia	o__Bacteroidales	f__Porphyromonadaceae	g__Porphyromonas	Porphyromonas pasteri	Saliva
AB1095_Plaque.17	AB837_Saliva.24	978378	Schmartz_2024	known	AB1095_Plaque	88.4	2.24	Neural Network (Specific Model)	11	855	8067	2817961215932914	1883277	3	1908	315	34786	None	substantial	MQ	d__Bacteria	p__Fusobacteriota	c__Fusobacteriia	o__Fusobacteriales	f__Leptotrichiaceae	g__Leptotrichia	Leptotrichia wadei	Plaque
AB1095_Plaque.28	AB1095_Plaque.35	999775	Schmartz_2024	known	AB1095_Plaque	94.52	0.13	Neural Network (Specific Model)	11	89	21550	2910431177446103	590661	35	603	44	47979	None	near	HQ	d__Bacteria	p__Patescibacteria	c__Saccharimonadia	o__Saccharimonadales	f__Nanogingivalaceae	g__Nanogingivalis		Plaque
AB1095_Plaque.38	GCF_018127965.1	9589	GTDB	known	AB1095_Plaque	51.87	4.16	Neural Network (Specific Model)	11	838	3212	2657535734705546	1660707	41	1749	544	14278	None	moderate	MQ	d__Bacteria	p__Bacteroidota	c__Bacteroidia	o__Bacteroidales	f__Bacteroidaceae	g__Prevotella	Prevotella melaninogenica_B	Plaque
AB1095_Plaque.48	AB1490_Plaque.47	995124	Schmartz_2024	known	AB1095_Plaque	82.68	2.93	Neural Network (Specific Model)	11	923	10628	2750013793103448	646617	48	725	89	32246	None	substantial	MQ	d__Bacteria	p__Patescibacteria	c__Saccharimonadia	o__Saccharimonadales	f__Nanosynbacteraceae	g__Nanosynbacter		Plaque
AB1095_Plaque.52	AB1095_Plaque.58	99991	Schmartz_2024	known	AB1095_Plaque	57.44	1.31	Neural Network (Specific Model)	11	914	3045	2.29085e+16	1312344	38	1751	457	12268	None	moderate	MQ	d__Bacteria	p__Campylobacterota	c__Campylobacteria	o__Campylobacterales	f__Campylobacteraceae	g__Campylobacter_A	Campylobacter_A concisus_S	Plaque
AB1095_Plaque.54	AB1141_Plaque.20	971566	Schmartz_2024	known	AB1095_Plaque	92.3	2.26	Gradient Boost (General Model)	11	914	8875	2.98582e+16	1824586	57	1867	264	34129	None	near	HQ	d__Bacteria	p__Bacillota_A	c__Clostridia	o__Lachnospirales	f__Lachnospiraceae	g__Moryella	Moryella longum	Plaque
AB1095_Plaque.68	AB1428_Plaque.18	993956	Schmartz_2024	known	AB1095_Plaque	80.59	0.14	Neural Network (Specific Model)	11	874	34209	3.04657e+16	1443729	46	1383	68	95658	None	substantial	MQ	d__Bacteria	p__Bacillota_C	c__Negativicutes	o__Veillonellales	f__Dialisteraceae	g__Dialister	Dialister invisus	Plaque
AB1095_Plaque.70	AB1095_Plaque.22	999989	Schmartz_2024	known	AB1095_Plaque	62.31	0.6	Neural Network (Specific Model)	11	895	4542	2.86369e+16	1138967	49	1189	289	12265	None	moderate	MQ	d__Bacteria	p__Bacteroidota	c__Bacteroidia	o__Bacteroidales	f__Porphyromonadaceae	g__Porphyromonas	Porphyromonas endodontalis	Plaque
AB1095_Plaque.87	AB1095_Plaque.15	99999	Schmartz_2024	known	AB1095_Plaque	53.42	1.66	Neural Network (Specific Model)	11	889	2950	2.69307e+16	1273519	59	1405	434	19744	None	moderate	MQ	d__Bacteria	p__Actinomycetota	c__Actinomycetes	o__Actinomycetales	f__Bifidobacteriaceae	g__Bifidobacterium	Bifidobacterium dentium	Plaque
AB1095_Plaque.89	AB1720_Plaque.12	985724	Schmartz_2024	known	AB1095_Plaque	66.21	1.7	Gradient Boost (General Model)	11	916	4018	2560676328502415	1038760	38	1242	289	16487	None	moderate	MQ	d__Bacteria	p__Bacillota_I	c__Bacilli_A	o__Erysipelotrichales	f__Erysipelotrichaceae	g__Bulleidia	Bulleidia moorei	Plaque
AB1095_Plaque.98	AB1095_Plaque.52	999999	Schmartz_2024	known	AB1095_Plaque	99.68	0.02	Neural Network (Specific Model)	11	886	177613	3.34395e+16	835058	5	739	14	249168	None	near	HQ	d__Bacteria	p__Patescibacteria	c__Saccharimonadia	o__Saccharimonadales	f__Nanoperiomorbaceae	g__Nanoperiomorbus		Plaque
AB1107_Plaque.1	AB1107_Plaque.24	999998	Schmartz_2024	known	AB1107_Plaque	94.73	0.07	Neural Network (Specific Model)	11	903	16808	3211951951951952	709589	51	666	57	49113	None	near	HQ	d__Bacteria	p__Patescibacteria	c__Saccharimonadia	o__Saccharimonadales	f__Nanoperiomorbaceae	g__Nanoperiomorbus		Plaque
AB1107_Plaque.14	AB1759_Throat.2	978507	Schmartz_2024	known	AB1107_Plaque	92.19	0.48	Neural Network (Specific Model)	11	911	721329	3.0499e+16	911652	48	910	3	721329	None	near	HQ	d__Bacteria	p__Patescibacteria	c__Saccharimonadia	o__Saccharimonadales	f__Saccharimonadaceae	g__Saccharimonas	Saccharimonas sp905372855	Plaque
AB1107_Plaque.28	GCF_023109195.1	9628	GTDB	known	AB1107_Plaque	99.76	0.01	Neural Network (Specific Model)	11	898	110194	3.11548e+16	1846668	41	1778	31	294213	None	near	HQ	d__Bacteria	p__Bacillota	c__Bacilli	o__Lactobacillales	f__Streptococcaceae	g__Streptococcus	Streptococcus oralis_BV	Plaque
AB1107_Plaque.3	MGYG000004321	977778	UHGG	known	AB1107_Plaque	62.53	3.68	Neural Network (Specific Model)	11	874	6796	25598375	1402783	37	1600	264	34812	None	moderate	MQ	d__Bacteria	p__Bacillota	c__Bacilli	o__Lactobacillales	f__Streptococcaceae	g__Streptococcus	Streptococcus constellatus	Plaque
AB1107_Plaque.47	AB1056_Plaque.4	999082	Schmartz_2024	known	AB1107_Plaque	81.65	2.52	Neural Network (Specific Model)	11	912	4475	2708460359176522	4060383	71	4566	1043	18317	None	substantial	MQ	d__Bacteria	p__Actinomycetota	c__Actinomycetes	o__Propionibacteriales	f__Nocardioidaceae	g__Marmoricola		Plaque
AB1107_Plaque.53	GCA_938017765.1	986	GTDB	known	AB1107_Plaque	53.94	0.39	Neural Network (Specific Model)	11	884	4149	268701230228471	1036861	33	1138	285	24237	None	moderate	MQ	d__Bacteria	p__Fusobacteriota	c__Fusobacteriia	o__Fusobacteriales	f__Leptotrichiaceae	g__Pseudoleptotrichia	Pseudoleptotrichia sp938017765	Plaque
AB1107_Plaque.9	AB1254_Plaque.40	973199	Schmartz_2024	known	AB1107_Plaque	71.19	1.03	Gradient Boost (General Model)	11	9	4211	2.52549e+16	1650206	6	1965	449	17503	None	substantial	MQ	d__Bacteria	p__Pseudomonadota	c__Gammaproteobacteria	o__Cardiobacteriales	f__Cardiobacteriaceae	g__Cardiobacterium	Cardiobacterium sp916618745	Plaque
AB1107_Saliva.26	AB1461_Throat.33	997496	Schmartz_2024	known	AB1107_Saliva	64.81	0.04	Neural Network (Specific Model)	11	868	316104	3.10689e+16	1278601	49	1192	8	335560	None	moderate	MQ	d__Bacteria	p__Pseudomonadota	c__Gammaproteobacteria	o__Burkholderiales	f__Neisseriaceae	g__Neisseria	Neisseria flavescens_B	Saliva
AB1107_Saliva.29	GCF_001560895.1	9663	GTDB	known	AB1107_Saliva	56.89	0.2	Neural Network (Specific Model)	11	891	52344	3.07534e+16	1072052	41	1038	42	123363	None	moderate	MQ	d__Bacteria	p__Bacillota	c__Bacilli	o__Lactobacillales	f__Streptococcaceae	g__Streptococcus	Streptococcus mitis_Q	Saliva
AB1107_Saliva.42	AB1107_Saliva.11	99981	Schmartz_2024	known	AB1107_Saliva	64.68	0.3	Neural Network (Specific Model)	11	865	3390	2730865110984633	1661080	62	1757	530	9618	None	moderate	MQ	d__Bacteria	p__Actinomycetota	c__Coriobacteriia	o__Coriobacteriales	f__Atopobiaceae	g__Olsenella_F	Olsenella_F sp001189515	Saliva
AB1107_Saliva.45	AB1773_Throat.19	968933	Schmartz_2024	known	AB1107_Saliva	56.92	0.19	Neural Network (Specific Model)	11	915	5384	2817507246376812	954044	42	1035	209	24431	None	moderate	MQ	d__Bacteria	p__Bacillota_A	c__Clostridia	o__Peptostreptococcales	f__Anaerovoracaceae	g__Eubacterium_B	Eubacterium_B sulci	Saliva
AB1107_Saliva.46	AB1130_Saliva.3	977362	Schmartz_2024	known	AB1107_Saliva	80.21	0.67	Neural Network (Specific Model)	11	86	10076	3.0355e+16	1458735	31	1379	213	35537	None	substantial	MQ	d__Bacteria	p__Fusobacteriota	c__Fusobacteriia	o__Fusobacteriales	f__Leptotrichiaceae	g__Leptotrichia	Leptotrichia wadei_A	Saliva
AB1107_Saliva.59	GCF_902373545.1	9728	GTDB	known	AB1107_Saliva	78.22	1.34	Neural Network (Specific Model)	11	874	16909	3.26355e+16	2187385	66	1956	210	110473	None	substantial	MQ	d__Bacteria	p__Actinomycetota	c__Actinomycetes	o__Actinomycetales	f__Actinomycetaceae	g__Pauljensenia	Pauljensenia sp902373545	Saliva
AB1120_Plaque.2	GCA_000613925.1	9803	GTDB	known	AB1120_Plaque	91.4	2.65	Neural Network (Specific Model)	11	85	20489	3344682332463011	2708109	41	2298	226	73164	None	near	HQ	d__Bacteria	p__Bacteroidota	c__Bacteroidia	o__Bacteroidales	f__Bacteroidaceae	g__Prevotella	Prevotella histicola	Plaque
AB1120_Plaque.25	AB1120_Plaque.51	999999	Schmartz_2024	known	AB1120_Plaque	97.95	0.16	Neural Network (Specific Model)	11	885	51410	3.31757e+16	822909	5	733	28	154689	None	near	HQ	d__Bacteria	p__Patescibacteria	c__Saccharimonadia	o__Saccharimonadales	f__Nanoperiomorbaceae	g__Nanoperiomorbus		Plaque
AB1120_Plaque.48	GCF_001553935.1	9718	GTDB	known	AB1120_Plaque	60.09	2.43	Neural Network (Specific Model)	11	868	4194	2884863813229572	1791734	7	1799	489	19828	None	moderate	MQ	d__Bacteria	p__Actinomycetota	c__Actinomycetes	o__Actinomycetales	f__Actinomycetaceae	g__Actinomyces	Actinomyces oris_A	Plaque
AB1120_Plaque.52	CM_periimplantitis__SP_283SPI_T016__bin_18	984825	Pasolli_2019	known	AB1120_Plaque	71.78	0.66	Neural Network (Specific Model)	11	902	7223	2913724183877415	1452428	59	1501	265	37885	None	substantial	MQ	d__Bacteria	p__Bacillota_C	c__Negativicutes	o__Selenomonadales	f__Selenomonadaceae	g__Centipeda	Centipeda felix	Plaque
AB1120_Plaque.6	AB1632_Throat.18	979047	Schmartz_2024	known	AB1120_Plaque	99.29	0.06	Neural Network (Specific Model)	11	922	421025	3009795918367347	717865	43	735	2	421025	None	near	HQ	d__Bacteria	p__Patescibacteria	c__Saccharimonadia	o__Saccharimonadales	f__Nanosynbacteraceae	g__Nanosynbacter		Plaque
AB1120_Plaque.61	MGYG000002639	962509	UHGG	known	AB1120_Plaque	94.92	0.44	Neural Network (Specific Model)	11	905	29232	3080045740423099	1783422	38	1749	86	98670	None	near	HQ	d__Bacteria	p__Pseudomonadota	c__Gammaproteobacteria	o__Enterobacterales	f__Pasteurellaceae	g__Haemophilus	Haemophilus haemolyticus_K	Plaque
AB1120_Plaque.63	AB1298_Throat.1	972063	Schmartz_2024	known	AB1120_Plaque	94.38	0.43	Neural Network (Specific Model)	11	863	44203	3.27442e+16	3103030	41	2730	140	201355	None	near	HQ	d__Bacteria	p__Bacteroidota	c__Bacteroidia	o__Bacteroidales	f__Bacteroidaceae	g__Prevotella	Prevotella salivae	Plaque
AB1120_Plaque.65	GCF_002959915.1	9715	GTDB	known	AB1120_Plaque	74.46	4.66	Neural Network (Specific Model)	11	894	41331	3136243842364532	1706355	39	1624	67	146453	None	substantial	MQ	d__Bacteria	p__Bacillota_C	c__Negativicutes	o__Veillonellales	f__Veillonellaceae	g__Veillonella	Veillonella atypica	Plaque
AB1120_Plaque.7	GCF_001808665.1	9679	GTDB	known	AB1120_Plaque	94.39	0.6	Neural Network (Specific Model)	11	898	42475	3140583468395462	1938734	4	1851	86	209381	None	near	HQ	d__Bacteria	p__Bacillota	c__Bacilli	o__Lactobacillales	f__Streptococcaceae	g__Streptococcus	Streptococcus sp001808665	Plaque
AB1131_Saliva.18	GCF_000144405.1	9688	GTDB	known	AB1131_Saliva	51.56	0.01	Neural Network (Specific Model)	11	835	115336	3453685823754789	1617975	41	1305	23	323720	None	moderate	MQ	d__Bacteria	p__Bacteroidota	c__Bacteroidia	o__Bacteroidales	f__Bacteroidaceae	g__Prevotella	Prevotella melaninogenica	Saliva
AB1131_Saliva.2	BackhedF_2015__SID42_B__bin_1	965261	Pasolli_2019	known	AB1131_Saliva	80.03	0.07	Neural Network (Specific Model)	11	885	74468	3155926470588235	1453159	4	1360	37	150846	None	substantial	MQ	d__Bacteria	p__Bacillota	c__Bacilli	o__Lactobacillales	f__Streptococcaceae	g__Streptococcus	Streptococcus salivarius_D	Saliva
AB1131_Saliva.24	GCF_014287335.1	9935	GTDB	known	AB1131_Saliva	92.16	3.59	Neural Network (Specific Model)	11	885	19092	2826388319672131	1867411	39	1952	175	98186	None	near	HQ	d__Bacteria	p__Bacillota	c__Bacilli	o__Lactobacillales	f__Streptococcaceae	g__Streptococcus	Streptococcus hominis	Saliva
AB1131_Saliva.28	CM_cf__CF_TNFC023IS_t3M15__bin_13	97631	Pasolli_2019	known	AB1131_Saliva	92.24	2.25	Neural Network (Specific Model)	11	899	64282	3013733252131547	1648571	39	1642	48	236163	None	near	HQ	d__Bacteria	p__Bacillota	c__Bacilli	o__Lactobacillales	f__Streptococcaceae	g__Streptococcus	Streptococcus peroris	Saliva
AB1131_Saliva.5	AB1131_Saliva.5	999898	Schmartz_2024	known	AB1131_Saliva	52.81	1.68	Neural Network (Specific Model)	11	892	3150	2814726368159204	1330087	59	1407	446	14874	None	moderate	MQ	d__Bacteria	p__Actinomycetota	c__Actinomycetes	o__Actinomycetales	f__Bifidobacteriaceae	g__Bifidobacterium	Bifidobacterium dentium	Saliva
AB1138_Plaque.25	AB1741_Throat.19	987892	Schmartz_2024	known	AB1138_Plaque	99.99	0.09	Neural Network (Specific Model)	11	867	428575	3.41936e+16	2466140	6	2090	9	578558	None	near	HQ	d__Bacteria	p__Actinomycetota	c__Actinomycetes	o__Actinomycetales	f__Actinomycetaceae	g__Peptidiphaga		Plaque
AB1138_Plaque.28	GCF_002094975.1	9685	GTDB	known	AB1138_Plaque	53.62	4.51	Neural Network (Specific Model)	11	879	4322	265335931410756	1160000	41	1283	289	22047	None	moderate	MQ	d__Bacteria	p__Bacillota	c__Bacilli	o__Lactobacillales	f__Streptococcaceae	g__Streptococcus	Streptococcus salivarius_D	Plaque
AB1138_Saliva.16	GCF_002094975.1	9791	GTDB	known	AB1138_Saliva	70.08	0.05	Neural Network (Specific Model)	11	882	46050	3.0552e+16	1277693	4	1231	52	169960	None	substantial	MQ	d__Bacteria	p__Bacillota	c__Bacilli	o__Lactobacillales	f__Streptococcaceae	g__Streptococcus	Streptococcus salivarius_D	Saliva
AB1138_Saliva.17	AB1138_Saliva.7	999578	Schmartz_2024	known	AB1138_Saliva	63.04	0.91	Gradient Boost (General Model)	11	868	3754	2.6446e+16	1758921	44	1929	504	18949	None	moderate	MQ	d__Bacteria	p__Bacillota_A	c__Clostridia	o__Lachnospirales	f__Lachnospiraceae	g__Oribacterium	Oribacterium sinus	Saliva
AB1138_Saliva.3	GCF_000185845.1	977	GTDB	known	AB1138_Saliva	58.21	1.91	Neural Network (Specific Model)	11	868	4590	2938476672287802	1804202	42	1779	446	23738	None	moderate	MQ	d__Bacteria	p__Bacteroidota	c__Bacteroidia	o__Bacteroidales	f__Bacteroidaceae	g__Prevotella	Prevotella salivae	Saliva
AB1141_Plaque.10	GCA_905371725.1	9706	GTDB	known	AB1141_Plaque	87.38	0.48	Neural Network (Specific Model)	11	886	12234	3037475149105368	2066968	31	2012	240	67670	None	substantial	MQ	d__Bacteria	p__Fusobacteriota	c__Fusobacteriia	o__Fusobacteriales	f__Leptotrichiaceae	g__Leptotrichia_A	Leptotrichia_A sp905371725	Plaque
AB1141_Plaque.12	GCF_031191205.1	9675	GTDB	known	AB1141_Plaque	99.89	2	Neural Network (Specific Model)	11	91	17163	3016776817488561	1954567	39	1967	187	74484	None	near	HQ	d__Bacteria	p__Pseudomonadota	c__Gammaproteobacteria	o__Enterobacterales	f__Pasteurellaceae	g__Haemophilus_D	Haemophilus_D parainfluenzae	Plaque
AB1141_Plaque.17	CM_periimplantitis__SP_344SPT_T016__bin_9	951624	Pasolli_2019	known	AB1141_Plaque	96.07	0.25	Neural Network (Specific Model)	11	851	20763	2829454459203036	2098074	46	2108	153	81783	None	near	HQ	d__Bacteria	p__Campylobacterota	c__Campylobacteria	o__Campylobacterales	f__Campylobacteraceae	g__Campylobacter_A		Plaque
AB1141_Plaque.19	HMP_2012__SRS063932__bin_49	970215	Pasolli_2019	known	AB1141_Plaque	95.46	0.86	Neural Network (Specific Model)	11	891	504531	3.35151e+16	1835092	44	1628	12	646775	None	near	HQ	d__Bacteria	p__Bacteroidota	c__Bacteroidia	o__Bacteroidales	f__Paludibacteraceae	g__F0058	F0058 sp905372605	Plaque
AB1141_Plaque.23	HMP_2012__SRS045197__bin_62	969268	Pasolli_2019	known	AB1141_Plaque	98.01	0.27	Gradient Boost (General Model)	11	903	39463	3360	2414468	32	2166	106	125079	None	near	HQ	d__Bacteria	p__Bacillota_A	c__Clostridia	o__Lachnospirales	f__Lachnospiraceae	g__CALALP01	CALALP01 sp937925515	Plaque
AB1141_Plaque.31	GCA_905372865.1	979	GTDB	known	AB1141_Plaque	87.94	1.68	Neural Network (Specific Model)	11	917	74953	3.17734e+16	2217002	57	2138	59	181108	None	substantial	MQ	d__Bacteria	p__Bacillota_C	c__Negativicutes	o__Selenomonadales	f__Selenomonadaceae	g__Centipeda	Centipeda sp905372865	Plaque
AB1141_Plaque.38	HMP_2012__SRS019028__bin_12	975666	Pasolli_2019	known	AB1141_Plaque	72.99	0.42	Gradient Boost (General Model)	11	9	3680	2602093457943925	463028	35	535	131	12104	None	substantial	MQ	d__Bacteria	p__Patescibacteria	c__Saccharimonadia	o__Saccharimonadales	f__Nanogingivalaceae	g__Nanogingivalis	Nanogingivalis sp938030735	Plaque
AB1141_Plaque.4	AB1294_Plaque.34	973675	Schmartz_2024	known	AB1141_Plaque	68.06	0.62	Neural Network (Specific Model)	11	873	7767	2815992601726264	1566003	59	1622	276	27743	None	moderate	MQ	d__Bacteria	p__Bacillota_C	c__Negativicutes	o__Selenomonadales	f__Selenomonadaceae	g__Selenomonas	Selenomonas sp905372355	Plaque
AB1141_Plaque.44	HMP_2012__SRS013252__bin_14	970941	Pasolli_2019	known	AB1141_Plaque	62.94	0.35	Neural Network (Specific Model)	11	861	78033	3613732809430255	1920421	44	1527	33	207679	None	moderate	MQ	d__Bacteria	p__Bacteroidota	c__Bacteroidia	o__Bacteroidales	f__Bacteroidaceae	g__Prevotella	Prevotella saccharolytica	Plaque
AB1141_Plaque.50	AB1699_Plaque.14	956191	Schmartz_2024	known	AB1141_Plaque	90.84	0.77	Neural Network (Specific Model)	11	829	50203	2869343704423918	2132467	57	2057	67	125290	None	near	HQ	d__Bacteria	p__Pseudomonadota	c__Gammaproteobacteria	o__Burkholderiales	f__Neisseriaceae	g__Eikenella	Eikenella halliae	Plaque
AB1141_Plaque.59	GCF_003943505.1	9849	GTDB	known	AB1141_Plaque	62.75	2.43	Neural Network (Specific Model)	11	877	8241	2667163498098859	1197051	43	1315	183	26776	None	moderate	MQ	d__Bacteria	p__Bacillota	c__Bacilli	o__Lactobacillales	f__Streptococcaceae	g__Streptococcus	Streptococcus cristatus_E	Plaque
AB1141_Plaque.7	GCA_938017765.1	9862	GTDB	known	AB1141_Plaque	54.95	4.06	Neural Network (Specific Model)	11	895	2773	257226872246696	1172585	32	1362	437	14140	None	moderate	MQ	d__Bacteria	p__Fusobacteriota	c__Fusobacteriia	o__Fusobacteriales	f__Leptotrichiaceae	g__Pseudoleptotrichia	Pseudoleptotrichia sp938017765	Plaque
AB1141_Saliva.15	AB1141_Saliva.19	999502	Schmartz_2024	known	AB1141_Saliva	72	0.46	Gradient Boost (General Model)	11	884	2977	2.66687e+16	1372448	57	1520	485	13505	None	substantial	MQ	d__Bacteria	p__Bacillota_A	c__Clostridia	o__Lachnospirales	f__Lachnospiraceae	g__Oribacterium	Oribacterium sp000160135	Saliva
AB1141_Saliva.2	GCF_000158275.2	9863	GTDB	known	AB1141_Saliva	77.25	1.22	Neural Network (Specific Model)	11	891	9329	2917842391304348	1804535	28	1840	272	236279	None	substantial	MQ	d__Bacteria	p__Fusobacteriota	c__Fusobacteriia	o__Fusobacteriales	f__Fusobacteriaceae	g__Fusobacterium	Fusobacterium animalis	Saliva
AB1141_Saliva.24	AB1020_Plaque.36	988435	Schmartz_2024	known	AB1141_Saliva	98.4	0	Gradient Boost (General Model)	11	855	13204	3.0415e+16	1612255	56	1514	191	46197	None	near	HQ	d__Bacteria	p__Actinomycetota	c__Coriobacteriia	o__Coriobacteriales	f__Atopobiaceae	g__UBA7748	UBA7748 sp003862175	Saliva
AB1141_Saliva.27	AB1436_Throat.16	976557	Schmartz_2024	known	AB1141_Saliva	65.51	0.58	Neural Network (Specific Model)	11	9	5549	2.8026e+16	1231532	42	1321	266	35992	None	moderate	MQ	d__Bacteria	p__Bacillota_A	c__Clostridia	o__Peptostreptococcales	f__Anaerovoracaceae	g__Mogibacterium	Mogibacterium diversum	Saliva
AB1141_Saliva.28	AB1141_Saliva.11	999913	Schmartz_2024	known	AB1141_Saliva	60.64	0.09	Neural Network (Specific Model)	11	909	3012	2.50483e+16	1515766	61	1839	537	10657	None	moderate	MQ	d__Bacteria	p__Desulfobacterota	c__Desulfovibrionia	o__Desulfovibrionales	f__Desulfovibrionaceae	g__Desulfovibrio	Desulfovibrio sp003860215	Saliva
AB1141_Saliva.3	GCF_000767835.1	9508	GTDB	known	AB1141_Saliva	92.97	1.48	Neural Network (Specific Model)	11	873	16362	2866318289786223	2068345	42	2105	218	47816	None	near	HQ	d__Bacteria	p__Bacillota	c__Bacilli	o__Lactobacillales	f__Streptococcaceae	g__Streptococcus	Streptococcus sinensis	Saliva
AB1141_Saliva.37	AB1428_Plaque.18	987895	Schmartz_2024	known	AB1141_Saliva	95.81	0.16	Neural Network (Specific Model)	11	878	35069	297924422673198	1451689	46	1429	106	184410	None	near	HQ	d__Bacteria	p__Bacillota_C	c__Negativicutes	o__Veillonellales	f__Dialisteraceae	g__Dialister	Dialister invisus	Saliva
AB1141_Saliva.39	AB1486_Plaque.27	977531	Schmartz_2024	known	AB1141_Saliva	59.95	4.04	Gradient Boost (General Model)	11	895	2671	2591378698224852	1464150	64	1690	556	13620	None	moderate	MQ	d__Bacteria	p__Synergistota	c__Synergistia	o__Synergistales	f__Aminobacteriaceae	g__CAJPSE01	CAJPSE01 sp938040765	Saliva
AB1141_Saliva.43	AB1141_Saliva.15	99971	Schmartz_2024	known	AB1141_Saliva	65.9	1.4	Gradient Boost (General Model)	11	884	3351	2573105776444111	1161172	47	1333	373	16189	None	moderate	MQ	d__Bacteria	p__Bacillota_A	c__Clostridia	o__Peptostreptococcales	f__Anaerovoracaceae	g__Hornefia	Hornefia minuta	Saliva
AB1158_Saliva.14	AB1158_Saliva.10	999914	Schmartz_2024	known	AB1158_Saliva	67.67	0.29	Neural Network (Specific Model)	11	929	3668	2.48078e+16	1190712	41	1491	360	14042	None	moderate	MQ	d__Bacteria	p__Campylobacterota	c__Campylobacteria	o__Campylobacterales	f__Campylobacteraceae	g__Campylobacter_A	Campylobacter_A concisus_R	Saliva
AB1164_Plaque.2	AB1164_Plaque.39	999999	Schmartz_2024	known	AB1164_Plaque	93.96	0.24	Neural Network (Specific Model)	11	881	49850	2998516609392898	1780273	38	1746	69	136905	None	near	HQ	d__Bacteria	p__Bacillota	c__Bacilli	o__Lactobacillales	f__Streptococcaceae	g__Streptococcus	Streptococcus constellatus	Plaque
AB1164_Plaque.39	AB1164_Plaque.14	998967	Schmartz_2024	known	AB1164_Plaque	68.36	2.22	Gradient Boost (General Model)	11	891	3086	264837441314554	1515743	66	1704	516	13211	None	moderate	MQ	d__Bacteria	p__Synergistota	c__Synergistia	o__Synergistales	f__Aminobacteriaceae	g__Fretibacterium	Fretibacterium fastidiosum	Plaque
AB1164_Plaque.52	AB1164_Plaque.28	999911	Schmartz_2024	known	AB1164_Plaque	59.44	3.03	Neural Network (Specific Model)	11	896	3557	2.60305e+16	1486871	42	1710	450	15794	None	moderate	MQ	d__Bacteria	p__Bacillota_A	c__Clostridia	o__Lachnospirales	f__Lachnospiraceae	g__Butyrivibrio		Plaque
AB1164_Plaque.55	AB1164_Plaque.27	99986	Schmartz_2024	known	AB1164_Plaque	59.97	0.93	Gradient Boost (General Model)	11	88	3296	2770646455639768	2115113	66	2243	682	12247	None	moderate	MQ	d__Bacteria	p__Pseudomonadota	c__Gammaproteobacteria	o__Burkholderiales	f__Burkholderiaceae	g__Lautropia	Lautropia mirabilis	Plaque
AB1164_Saliva.11	GCF_016648925.1	9589	GTDB	known	AB1164_Saliva	56.01	1.22	Neural Network (Specific Model)	11	885	4124	2.70152e+16	1142006	43	1249	297	16661	None	moderate	MQ	d__Bacteria	p__Bacillota	c__Bacilli	o__Lactobacillales	f__Streptococcaceae	g__Streptococcus	Streptococcus sp900766505	Saliva
AB1164_Saliva.24	GCF_015265235.1	9778	GTDB	known	AB1164_Saliva	66.28	0.37	Neural Network (Specific Model)	11	921	6061	3010846774193548	1213795	6	1240	254	25861	None	moderate	MQ	d__Bacteria	p__Bacillota_C	c__Negativicutes	o__Selenomonadales	f__Selenomonadaceae	g__Centipeda	Centipeda sp015265235	Saliva
AB1164_Saliva.32	AB1700_Throat.30	973696	Schmartz_2024	known	AB1164_Saliva	69.26	2.76	Neural Network (Specific Model)	11	902	3732	2601927774827403	1626463	58	1883	483	14103	None	moderate	MQ	d__Bacteria	p__Bacillota_C	c__Negativicutes	o__Selenomonadales	f__Selenomonadaceae	g__Selenomonas	Selenomonas sputigena	Saliva
AB1164_Saliva.47	GCF_014202695.1	9633	GTDB	known	AB1164_Saliva	52.11	4.14	Gradient Boost (General Model)	11	86	3645	2.77002e+16	969180	44	1005	307	11683	None	moderate	MQ	d__Bacteria	p__Bacillota_A	c__Clostridia	o__Lachnospirales	f__Lachnospiraceae	g__Oribacterium	Oribacterium sinus	Saliva
AB1166_Plaque.14	GCF_007990525.1	9685	GTDB	known	AB1166_Plaque	58.66	3.62	Neural Network (Specific Model)	11	872	2563	2.37705e+16	1428483	31	1750	562	32148	None	moderate	MQ	d__Bacteria	p__Fusobacteriota	c__Fusobacteriia	o__Fusobacteriales	f__Leptotrichiaceae	g__Leptotrichia	Leptotrichia hofstadii	Plaque
AB1166_Plaque.26	AB1166_Plaque.12	998442	Schmartz_2024	known	AB1166_Plaque	51.3	0.31	Neural Network (Specific Model)	11	906	3869	2630780487804878	1069216	41	1230	305	15185	None	moderate	MQ	d__Bacteria	p__Bacteroidota	c__Bacteroidia	o__Flavobacteriales	f__Flavobacteriaceae	g__Capnocytophaga	Capnocytophaga gingivalis	Plaque
AB1166_Plaque.5	HMP_2012__SRS022149__bin_25	977325	Pasolli_2019	known	AB1166_Plaque	93.39	0.33	Neural Network (Specific Model)	11	898	56430	303381161971831	2298316	43	2272	67	287693	None	near	HQ	d__Bacteria	p__Bacillota	c__Bacilli	o__Lactobacillales	f__Streptococcaceae	g__Streptococcus	Streptococcus sanguinis_H	Plaque
AB1166_Plaque.51	AB1166_Plaque.29	999999	Schmartz_2024	known	AB1166_Plaque	92.06	0.15	Neural Network (Specific Model)	11	922	106946	3.10535e+16	729021	48	723	12	139666	None	near	HQ	d__Bacteria	p__Patescibacteria	c__Saccharimonadia	o__Saccharimonadales	f__Nanosynbacteraceae	g__Nanosynbacter		Plaque
AB1166_Plaque.57	GCF_900113545.1	967	GTDB	known	AB1166_Plaque	58.08	0.47	Neural Network (Specific Model)	11	85	4465	2.42562e+16	1284868	57	1504	326	23346	None	moderate	MQ	d__Bacteria	p__Pseudomonadota	c__Gammaproteobacteria	o__Burkholderiales	f__Neisseriaceae	g__Neisseria	Neisseria elongata	Plaque
AB1166_Saliva.7	AB1056_Throat.8	963685	Schmartz_2024	known	AB1166_Saliva	70.29	0.14	Neural Network (Specific Model)	11	878	14898	310195145631068	1090547	48	1030	126	56209	None	substantial	MQ	d__Bacteria	p__Actinomycetota	c__Coriobacteriia	o__Coriobacteriales	f__Atopobiaceae	g__Lancefieldella	Lancefieldella sp000564995	Saliva
AB1176_Plaque.18	AB1670_Saliva.5	983354	Schmartz_2024	known	AB1176_Plaque	67	2.71	Neural Network (Specific Model)	11	894	3731	2.7102e+16	2789645	66	3074	829	32755	None	moderate	MQ	d__Bacteria	p__Actinomycetota	c__Actinomycetes	o__Propionibacteriales	f__Propionibacteriaceae	g__Arachnia	Arachnia sp905372155	Plaque
AB1176_Plaque.20	GCF_003943905.1	9829	GTDB	known	AB1176_Plaque	68.98	4.65	Neural Network (Specific Model)	11	911	6062	2799229024943311	1217789	42	1323	256	20649	None	moderate	MQ	d__Bacteria	p__Bacillota	c__Bacilli	o__Lactobacillales	f__Streptococcaceae	g__Streptococcus	Streptococcus mitis_BC	Plaque
AB1176_Plaque.37	AB1648_Plaque.44	975764	Schmartz_2024	known	AB1176_Plaque	64.62	0.23	Gradient Boost (General Model)	11	922	3986	2698470254957507	618627	41	706	177	20068	None	moderate	MQ	d__Bacteria	p__Bacillota_A	c__Clostridia	o__Peptostreptococcales	f__Anaerovoracaceae	g__Eubacterium_N	Eubacterium_N saphenum	Plaque
AB1176_Plaque.39	AB1004_Plaque.6	957527	Schmartz_2024	known	AB1176_Plaque	99.24	0.08	Neural Network (Specific Model)	11	887	285067	35885554866708	1955889	48	1613	10	474896	None	near	HQ	d__Bacteria	p__Bacteroidota	c__Bacteroidia	o__Bacteroidales	f__Porphyromonadaceae	g__Porphyromonas	Porphyromonas endodontalis	Plaque
AB1176_Plaque.65	AB1077_Plaque.16	980819	Schmartz_2024	known	AB1176_Plaque	99.97	0.07	Neural Network (Specific Model)	11	877	58072	3.3103e+16	2519630	6	2230	64	192843	None	near	HQ	d__Bacteria	p__Desulfobacterota	c__Desulfobulbia	o__Desulfobulbales	f__Desulfobulbaceae	g__Desulfobulbus	Desulfobulbus oralis	Plaque
AB1176_Plaque.71	AB1485_Plaque.19	98165	Schmartz_2024	known	AB1176_Plaque	64.44	0.53	Neural Network (Specific Model)	11	919	6450	2692612781954887	466727	48	532	84	20779	None	moderate	MQ	d__Bacteria	p__Patescibacteria	c__Saccharimonadia	o__Saccharimonadales	f__Saccharimonadaceae	g__Saccharimonas		Plaque
AB1181_Saliva.11	AB1702_Throat.26	966016	Schmartz_2024	known	AB1181_Saliva	76.03	0.97	Gradient Boost (General Model)	11	883	4280	2489523076923077	1096956	4	1300	303	18955	None	substantial	MQ	d__Bacteria	p__Bacillota	c__Bacilli	o__Lactobacillales	f__Aerococcaceae	g__Granulicatella	Granulicatella sp001058355	Saliva
AB1181_Saliva.15	GCF_021222645.1	9637	GTDB	known	AB1181_Saliva	53.21	1.44	Gradient Boost (General Model)	11	904	3884	2.37262e+16	398444	43	507	113	13216	None	moderate	MQ	d__Bacteria	p__Patescibacteria	c__Saccharimonadia	o__Saccharimonadales	f__Nanosynbacteraceae	g__Nanosynbacter	Nanosynbacter sp021222645	Saliva
AB1181_Saliva.22	GCF_000194945.1	9679	GTDB	known	AB1181_Saliva	90.25	0.64	Neural Network (Specific Model)	11	895	82400	3.06823e+16	2202518	43	2146	56	184826	None	near	HQ	d__Bacteria	p__Bacillota	c__Bacilli	o__Lactobacillales	f__Streptococcaceae	g__Streptococcus	Streptococcus sanguinis	Saliva
AB1181_Saliva.24	GCF_002094975.1	9778	GTDB	known	AB1181_Saliva	55.83	0.04	Neural Network (Specific Model)	11	885	62599	3045292929292929	1020483	4	990	44	114400	None	moderate	MQ	d__Bacteria	p__Bacillota	c__Bacilli	o__Lactobacillales	f__Streptococcaceae	g__Streptococcus	Streptococcus salivarius_D	Saliva
AB1181_Saliva.27	AB1181_Saliva.16	999782	Schmartz_2024	known	AB1181_Saliva	71.58	0.49	Neural Network (Specific Model)	11	906	3939	2.5108e+16	1379095	4	1662	388	21203	None	substantial	MQ	d__Bacteria	p__Pseudomonadota	c__Gammaproteobacteria	o__Enterobacterales	f__Pasteurellaceae	g__Haemophilus_D	Haemophilus_D sp927911595	Saliva
AB1181_Saliva.5	AB1181_Saliva.8	999996	Schmartz_2024	known	AB1181_Saliva	99.71	0.3	Neural Network (Specific Model)	11	889	177936	3246099585062241	791286	41	723	9	252889	None	near	HQ	d__Bacteria	p__Patescibacteria	c__Saccharimonadia	o__Saccharimonadales	f__Nanosyncoccaceae	g__Nanosyncoccus		Saliva
AB1181_Saliva.8	GCF_013393365.1	9739	GTDB	known	AB1181_Saliva	51.1	1	Neural Network (Specific Model)	11	91	17291	3.09279e+16	704457	38	692	65	81895	None	moderate	MQ	d__Bacteria	p__Bacillota_C	c__Negativicutes	o__Veillonellales	f__Veillonellaceae	g__Veillonella	Veillonella nakazawae	Saliva
AB1197_Saliva.14	AB1197_Saliva.44	999947	Schmartz_2024	known	AB1197_Saliva	70.84	2.86	Neural Network (Specific Model)	11	883	5050	2665172900494001	1281457	43	1417	307	17743	None	substantial	MQ	d__Bacteria	p__Pseudomonadota	c__Gammaproteobacteria	o__Enterobacterales	f__Pasteurellaceae	g__Aggregatibacter	Aggregatibacter sp000466335	Saliva
AB1197_Saliva.45	AB1197_Saliva.27	100	Schmartz_2024	known	AB1197_Saliva	94.09	0.14	Neural Network (Specific Model)	11	922	224449	3.17896e+16	754471	48	731	6	276471	None	near	HQ	d__Bacteria	p__Patescibacteria	c__Saccharimonadia	o__Saccharimonadales	f__Nanosynbacteraceae	g__Nanosynbacter		Saliva
AB1197_Saliva.60	AB1197_Saliva.26	998895	Schmartz_2024	known	AB1197_Saliva	52.36	1.82	Neural Network (Specific Model)	11	913	4314	2.66519e+16	1288363	41	1473	341	16210	None	moderate	MQ	d__Bacteria	p__Bacteroidota	c__Bacteroidia	o__Flavobacteriales	f__Flavobacteriaceae	g__Capnocytophaga	Capnocytophaga leadbetteri	Saliva
AB1197_Saliva.83	AB1197_Saliva.41	999998	Schmartz_2024	known	AB1197_Saliva	92.89	1.13	Neural Network (Specific Model)	11	93	73256	3014737516005122	757300	44	781	11	291160	None	near	HQ	d__Bacteria	p__Patescibacteria	c__Saccharimonadia	o__Saccharimonadales	f__Nanosynbacteraceae	g__Nanosynbacter		Saliva
AB1199_Saliva.3	AB1356_Throat.15	979902	Schmartz_2024	known	AB1199_Saliva	99.99	0.09	Neural Network (Specific Model)	11	883	78684	3507177822177822	2380236	65	2002	47	280489	None	near	HQ	d__Bacteria	p__Actinomycetota	c__Actinomycetes	o__Actinomycetales	f__Actinomycetaceae	g__Pauljensenia	Pauljensenia sp019425105	Saliva
AB1199_Saliva.31	AB1199_Saliva.27	999982	Schmartz_2024	known	AB1199_Saliva	50.56	0.16	Neural Network (Specific Model)	11	894	3357	2857235059760956	1200903	59	1255	385	15414	None	moderate	MQ	d__Bacteria	p__Actinomycetota	c__Actinomycetes	o__Actinomycetales	f__Bifidobacteriaceae	g__Bifidobacterium	Bifidobacterium dentium	Saliva
AB1199_Saliva.34	AB1154_Eye.15	966302	Schmartz_2024	known	AB1199_Saliva	72.75	0.03	Neural Network (Specific Model)	11	87	21342	3090286320254507	1002830	48	943	88	74289	None	substantial	MQ	d__Bacteria	p__Actinomycetota	c__Coriobacteriia	o__Coriobacteriales	f__Atopobiaceae	g__Lancefieldella	Lancefieldella sp000564995	Saliva
AB1199_Saliva.38	AB1348_Saliva.27	973326	Schmartz_2024	known	AB1199_Saliva	99.86	0.01	Neural Network (Specific Model)	11	855	73777	3396652816251154	2577797	41	2166	54	239968	None	near	HQ	d__Bacteria	p__Bacteroidota	c__Bacteroidia	o__Bacteroidales	f__Bacteroidaceae	g__Prevotella	Prevotella vespertina	Saliva
AB1199_Saliva.47	GCA_900551535.1	9758	GTDB	known	AB1199_Saliva	71.84	3.29	Gradient Boost (General Model)	11	864	6648	2658564391273751	1309242	39	1421	252	36524	None	substantial	MQ	d__Bacteria	p__Bacillota	c__Bacilli	o__Lactobacillales	f__Aerococcaceae	g__Granulicatella	Granulicatella sp900551535	Saliva
AB1199_Saliva.48	AB1169_Plaque.6	976974	Schmartz_2024	known	AB1199_Saliva	77.38	2.27	Neural Network (Specific Model)	11	881	3768	2886042031523643	2240481	7	2284	669	17081	None	substantial	MQ	d__Bacteria	p__Actinomycetota	c__Actinomycetes	o__Actinomycetales	f__Actinomycetaceae	g__Actinomyces	Actinomyces oris	Saliva
AB1200_Saliva.10	GCA_015257795.3	9637	GTDB	known	AB1200_Saliva	50.82	0.2	Gradient Boost (General Model)	11	903	2898	2.51031e+16	296917	37	357	110	9344	None	moderate	MQ	d__Bacteria	p__Patescibacteria	c__Saccharimonadia	o__Saccharimonadales	f__Nanogingivalaceae	g__Nanogingivalis	Nanogingivalis sp015257795	Saliva
AB1200_Saliva.11	AB1036_Saliva.26	983453	Schmartz_2024	known	AB1200_Saliva	99.51	0	Neural Network (Specific Model)	11	903	133414	3.30503e+16	1475173	44	1345	16	327135	None	near	HQ	d__Bacteria	p__Bacillota_C	c__Negativicutes	o__Veillonellales	f__Veillonellaceae	g__Veillonella	Veillonella sp900550455	Saliva
AB1200_Saliva.2	AB1436_Saliva.20	979474	Schmartz_2024	known	AB1200_Saliva	56.64	3.06	Gradient Boost (General Model)	11	925	3015	2.55643e+16	1082186	37	1308	377	9901	None	moderate	MQ	d__Bacteria	p__Bacillota_I	c__Bacilli_A	o__Erysipelotrichales	f__Erysipelotrichaceae	g__Bulleidia	Bulleidia sp015256775	Saliva
AB1200_Saliva.20	AB1483_Throat.20	995145	Schmartz_2024	known	AB1200_Saliva	72.07	0.1	Neural Network (Specific Model)	11	879	186658	3198541014402004	1740128	6	1597	19	264353	None	substantial	MQ	d__Bacteria	p__Actinomycetota	c__Actinomycetes	o__Actinomycetales	f__Bifidobacteriaceae	g__Bifidobacterium	Bifidobacterium longum	Saliva
AB1200_Saliva.28	AB1200_Saliva.10	999196	Schmartz_2024	known	AB1200_Saliva	79.17	3.68	Neural Network (Specific Model)	11	867	4650	3.18433e+16	2044964	42	1858	501	28462	None	substantial	MQ	d__Bacteria	p__Bacteroidota	c__Bacteroidia	o__Bacteroidales	f__Bacteroidaceae	g__Prevotella	Prevotella histicola	Saliva
AB1200_Saliva.33	AB1633_Saliva.19	961465	Schmartz_2024	known	AB1200_Saliva	70.32	0.19	Neural Network (Specific Model)	11	897	42567	3429877450980392	934663	47	816	36	150517	None	substantial	MQ	d__Bacteria	p__Actinomycetota	c__Coriobacteriia	o__Coriobacteriales	f__Atopobiaceae	g__Lancefieldella	Lancefieldella sp000564995	Saliva
AB1200_Saliva.40	AB1200_Saliva.4	100	Schmartz_2024	known	AB1200_Saliva	99.17	0.16	Neural Network (Specific Model)	11	916	365140	2991881051175657	706758	43	723	6	365140	None	near	HQ	d__Bacteria	p__Patescibacteria	c__Saccharimonadia	o__Saccharimonadales	f__Nanosynbacteraceae	g__Nanosynbacter		Saliva
AB1210_Plaque.19	AB1210_Plaque.14	999999	Schmartz_2024	known	AB1210_Plaque	99.77	0.07	Neural Network (Specific Model)	11	835	49225	2954030303030303	2100290	56	1980	69	182113	None	near	HQ	d__Bacteria	p__Pseudomonadota	c__Gammaproteobacteria	o__Burkholderiales	f__Neisseriaceae	g__Eikenella	Eikenella corrodens	Plaque
AB1210_Plaque.20	AB1121_Plaque.4	974978	Schmartz_2024	known	AB1210_Plaque	99.9	0	Neural Network (Specific Model)	11	903	305947	3.34299e+16	2213110	57	1997	16	530827	None	near	HQ	d__Bacteria	p__Bacillota_C	c__Negativicutes	o__Selenomonadales	f__Selenomonadaceae	g__Selenomonas	Selenomonas sp905372355	Plaque
AB1210_Plaque.3	AB1758_Throat.18	977258	Schmartz_2024	known	AB1210_Plaque	99.02	0.34	Gradient Boost (General Model)	11	887	141499	3209451612903226	2015583	43	1860	23	248610	None	near	HQ	d__Bacteria	p__Bacteroidota	c__Bacteroidia	o__Bacteroidales	f__Paludibacteraceae	g__F0058	F0058 sp000163695	Plaque
AB1210_Plaque.37	GCF_000192225.1	9948	GTDB	known	AB1210_Plaque	55.58	0.73	Neural Network (Specific Model)	11	897	4241	2776299052774019	1370006	37	1478	358	23446	None	moderate	MQ	d__Bacteria	p__Bacteroidota	c__Bacteroidia	o__Flavobacteriales	f__Flavobacteriaceae	g__Capnocytophaga	Capnocytophaga sp000192225	Plaque
AB1210_Plaque.39	AB1210_Plaque.20	99995	Schmartz_2024	known	AB1210_Plaque	59.6	1.54	Neural Network (Specific Model)	11	903	3442	2.53315e+16	1181636	56	1406	359	13863	None	moderate	MQ	d__Bacteria	p__Bacillota_C	c__Negativicutes	o__Selenomonadales	f__Selenomonadaceae	g__CAJPQU01	CAJPQU01 sp905373705	Plaque
AB1210_Saliva.1	AB1474_Plaque.1	988059	Schmartz_2024	known	AB1210_Saliva	60.47	1.39	Neural Network (Specific Model)	11	905	2759	2525439681838268	1890894	67	2263	709	9620	None	moderate	MQ	d__Bacteria	p__Actinomycetota	c__Actinomycetes	o__Propionibacteriales	f__Propionibacteriaceae	g__Arachnia	Arachnia propionica	Saliva
AB1210_Saliva.30	GCA_900551535.1	9578	GTDB	known	AB1210_Saliva	64.08	1.74	Gradient Boost (General Model)	11	869	10164	2.67534e+16	970462	39	1053	139	67069	None	moderate	MQ	d__Bacteria	p__Bacillota	c__Bacilli	o__Lactobacillales	f__Aerococcaceae	g__Granulicatella	Granulicatella sp900551535	Saliva
AB1210_Saliva.39	MGYG000003113	977678	UHGG	known	AB1210_Saliva	96.08	0.14	Neural Network (Specific Model)	11	888	53366	3527742105263158	2261982	66	1900	66	231694	None	near	HQ	d__Bacteria	p__Actinomycetota	c__Actinomycetes	o__Actinomycetales	f__Actinomycetaceae	g__Pauljensenia	Pauljensenia sp001838165	Saliva
AB1210_Saliva.9	AB1210_Saliva.18	999938	Schmartz_2024	known	AB1210_Saliva	99.7	0.06	Neural Network (Specific Model)	11	867	14303	3516175115207373	2110188	56	1736	213	73823	None	near	HQ	d__Bacteria	p__Bacteroidota	c__Bacteroidia	o__Bacteroidales	f__Porphyromonadaceae	g__Porphyromonas	Porphyromonas pasteri	Saliva
AB1213_Plaque.15	GCA_007845485.1	9758	GTDB	known	AB1213_Plaque	59.14	2.91	Gradient Boost (General Model)	11	908	3303	2467859778597786	440842	37	542	142	10331	None	moderate	MQ	d__Bacteria	p__Patescibacteria	c__Saccharimonadia	o__Saccharimonadales	f__UBA10027	g__SDRW01	SDRW01 sp007845485	Plaque
AB1213_Plaque.16	GCA_905373185.1	9887	GTDB	known	AB1213_Plaque	50.64	0.23	Gradient Boost (General Model)	11	894	2954	2.51994e+16	1394524	64	1652	488	22426	None	moderate	MQ	d__Bacteria	p__Synergistota	c__Synergistia	o__Synergistales	f__Aminobacteriaceae	g__CAJPSE01	CAJPSE01 sp905373185	Plaque
AB1213_Plaque.28	MGYG000001347	980415	UHGG	known	AB1213_Plaque	90.99	0.01	Neural Network (Specific Model)	11	912	40409	3.13068e+16	2035177	27	1979	106	85609	None	near	HQ	d__Bacteria	p__Fusobacteriota	c__Fusobacteriia	o__Fusobacteriales	f__Fusobacteriaceae	g__Fusobacterium	Fusobacterium vincentii	Plaque
AB1213_Plaque.42	HeQ_2017__SZAXPI029474-42__bin_12	994649	Pasolli_2019	known	AB1213_Plaque	58	1.64	Neural Network (Specific Model)	11	903	8790	2811687817258883	734907	36	788	114	36503	None	moderate	MQ	d__Bacteria	p__Bacillota_C	c__Negativicutes	o__Veillonellales	f__Dialisteraceae	g__Allisonella	Allisonella pneumosinta	Plaque
AB1213_Plaque.50	AB1213_Plaque.33	999987	Schmartz_2024	known	AB1213_Plaque	50.03	2.67	Gradient Boost (General Model)	11	871	3224	2565388379204893	1439745	6	1635	478	9506	None	moderate	MQ	d__Bacteria	p__Actinomycetota	c__Actinomycetes	o__Actinomycetales	f__Actinomycetaceae	g__Peptidiphaga		Plaque
AB1213_Plaque.51	GCA_900450455.1	9789	GTDB	known	AB1213_Plaque	74.23	4.48	Neural Network (Specific Model)	11	903	5591	2822517942583732	1564799	41	1672	328	28173	None	substantial	MQ	d__Bacteria	p__Bacillota_A	c__Clostridia	o__Peptostreptococcales	f__Anaerovoracaceae	g__Eubacterium_B	Eubacterium_B infirmum	Plaque
AB1213_Plaque.52	AB1213_Plaque.36	999955	Schmartz_2024	known	AB1213_Plaque	52.05	3.43	Neural Network (Specific Model)	11	941	2743	2574850260416667	1257556	44	1536	474	8594	None	moderate	MQ	d__Bacteria	p__Spirochaetota	c__Spirochaetia	o__Treponematales	f__Treponemataceae	g__Treponema_C	Treponema_C lecithinolyticum	Plaque
AB1213_Plaque.63	AB1263_Plaque.57	981333	Schmartz_2024	known	AB1213_Plaque	52.68	1.95	Gradient Boost (General Model)	11	922	3239	2.45834e+16	845472	51	1061	277	13664	None	moderate	MQ	d__Bacteria	p__Bacillota_I	c__Bacilli_A	o__Erysipelotrichales	f__Erysipelotrichaceae	g__Bulleidia		Plaque
AB1213_Plaque.69	AB1213_Plaque.41	999995	Schmartz_2024	known	AB1213_Plaque	99.98	0.36	Neural Network (Specific Model)	11	838	91083	2990677057963955	2193835	47	2053	45	259980	None	near	HQ	d__Bacteria	p__Campylobacterota	c__Campylobacteria	o__Campylobacterales	f__Campylobacteraceae	g__Campylobacter_B		Plaque
AB1213_Plaque.8	AB1213_Plaque.7	999996	Schmartz_2024	known	AB1213_Plaque	87.23	1.89	Neural Network (Specific Model)	11	915	752222	302557582668187	867627	48	877	4	752222	None	substantial	MQ	d__Bacteria	p__Patescibacteria	c__Saccharimonadia	o__Saccharimonadales	f__Saccharimonadaceae	g__Saccharimonas		Plaque
AB1213_Saliva.44	GCA_900555675.1	9639	GTDB	known	AB1213_Saliva	78.91	0.61	Neural Network (Specific Model)	11	913	18182	2.87088e+16	569164	44	605	47	67369	None	substantial	MQ	d__Bacteria	p__Patescibacteria	c__Saccharimonadia	o__Saccharimonadales	f__Nanosynbacteraceae	g__Nanosynbacter	Nanosynbacter sp900555675	Saliva
AB1213_Saliva.57	GCF_900186465.1	9878	GTDB	known	AB1213_Saliva	53.4	3.32	Neural Network (Specific Model)	11	911	6379	2943111658456486	1178065	59	1218	237	18764	None	moderate	MQ	d__Bacteria	p__Bacillota_C	c__Negativicutes	o__Selenomonadales	f__Selenomonadaceae	g__Centipeda	Centipeda felix	Saliva
AB1213_Saliva.68	HMP_2012__SRS053630__bin_15	994245	Pasolli_2019	known	AB1213_Saliva	86.61	2.05	Neural Network (Specific Model)	11	871	240908	3.03268e+16	1733612	37	1662	25	389276	None	substantial	MQ	d__Bacteria	p__Bacillota	c__Bacilli	o__Lactobacillales	f__Streptococcaceae	g__Streptococcus	Streptococcus mutans	Saliva
AB1213_Saliva.69	MGYG000002983	979658	UHGG	known	AB1213_Saliva	81.1	1.34	Neural Network (Specific Model)	11	878	51343	3.05293e+16	1434867	29	1377	67	100385	None	substantial	MQ	d__Bacteria	p__Bacillota	c__Bacilli	o__Staphylococcales	f__Gemellaceae	g__Gemella	Gemella sp900555985	Saliva
AB1214_Plaque.14	AB1214_Plaque.35	999995	Schmartz_2024	known	AB1214_Plaque	55.76	0.2	Gradient Boost (General Model)	11	918	3831	2.54635e+16	1056946	45	1275	305	11608	None	moderate	MQ	d__Bacteria	p__Bacillota_I	c__Bacilli_A	o__Erysipelotrichales	f__Erysipelotrichaceae	g__Bulleidia		Plaque
AB1214_Plaque.22	AB1720_Plaque.12	989306	Schmartz_2024	known	AB1214_Plaque	87.26	2.98	Gradient Boost (General Model)	11	918	5968	2771034275405893	1501903	37	1663	321	20258	None	substantial	MQ	d__Bacteria	p__Bacillota_I	c__Bacilli_A	o__Erysipelotrichales	f__Erysipelotrichaceae	g__Bulleidia	Bulleidia moorei	Plaque
AB1214_Plaque.37	AB1005_Plaque.25	982714	Schmartz_2024	known	AB1214_Plaque	99.99	0.21	Neural Network (Specific Model)	11	885	222788	3047200429876411	1917605	38	1861	25	514726	None	near	HQ	d__Bacteria	p__Bacillota	c__Bacilli	o__Lactobacillales	f__Streptococcaceae	g__Streptococcus	Streptococcus intermedius	Plaque
AB1214_Plaque.42	GCA_000163695.1	9765	GTDB	known	AB1214_Plaque	65.69	2.91	Gradient Boost (General Model)	11	898	4099	2862897678417885	1111350	44	1163	294	14183	None	moderate	MQ	d__Bacteria	p__Bacteroidota	c__Bacteroidia	o__Bacteroidales	f__Paludibacteraceae	g__F0058	F0058 sp000163695	Plaque
AB1214_Plaque.67	AB1801_Plaque.35	951061	Schmartz_2024	known	AB1214_Plaque	97.44	0.64	Neural Network (Specific Model)	11	895	93765	3.35193e+16	766379	51	683	17	213453	None	near	HQ	d__Bacteria	p__Patescibacteria	c__Saccharimonadia	o__Saccharimonadales	f__Nanoperiomorbaceae	g__Nanoperiomorbus		Plaque
AB1214_Saliva.13	GCF_018128285.1	9854	GTDB	known	AB1214_Saliva	55.32	0.93	Neural Network (Specific Model)	11	874	4415	2.68378e+16	1103371	56	1200	280	14039	None	moderate	MQ	d__Bacteria	p__Actinomycetota	c__Coriobacteriia	o__Coriobacteriales	f__Atopobiaceae	g__UBA7748	UBA7748 sp003862175	Saliva
AB1214_Saliva.15	AB1214_Saliva.20	999926	Schmartz_2024	known	AB1214_Saliva	56.34	0.59	Neural Network (Specific Model)	11	915	3043	2645493871665465	1199981	6	1387	422	10224	None	moderate	MQ	d__Bacteria	p__Bacillota_C	c__Negativicutes	o__Selenomonadales	f__Selenomonadaceae	g__Selenomonas	Selenomonas sp905373085	Saliva
AB1214_Saliva.16	GCF_015256775.1	9534	GTDB	known	AB1214_Saliva	53.08	1.3	Gradient Boost (General Model)	11	902	4017	2685884003741815	952761	37	1069	269	18218	None	moderate	MQ	d__Bacteria	p__Bacillota_I	c__Bacilli_A	o__Erysipelotrichales	f__Erysipelotrichaceae	g__Bulleidia	Bulleidia sp015256775	Saliva
AB1214_Saliva.25	GCF_001937445.1	9695	GTDB	known	AB1214_Saliva	63.26	2.7	Neural Network (Specific Model)	11	876	4216	2.76756e+16	2446505	69	2585	654	61389	None	moderate	MQ	d__Bacteria	p__Actinomycetota	c__Actinomycetes	o__Actinomycetales	f__Actinomycetaceae	g__Actinomyces	Actinomyces oris_C	Saliva
AB1214_Saliva.26	AB1108_Plaque.1	970668	Schmartz_2024	known	AB1214_Saliva	80.1	0.07	Neural Network (Specific Model)	11	902	1003306	3.31705e+16	1514057	47	1374	9	1003306	None	substantial	MQ	d__Bacteria	p__Bacillota	c__Bacilli	o__Lactobacillales	f__Aerococcaceae	g__Abiotrophia	Abiotrophia sp001815865	Saliva
AB1214_Saliva.30	GCA_938046585.1	9943	GTDB	known	AB1214_Saliva	72.7	0.88	Gradient Boost (General Model)	11	908	3801	2.64184e+16	2003793	67	2300	590	13797	None	substantial	MQ	d__Bacteria	p__Actinomycetota	c__Actinomycetes	o__Propionibacteriales	f__Propionibacteriaceae	g__Fen-668	Fen-668 sp938046585	Saliva
AB1219_Plaque.1	AB1219_Plaque.19	999969	Schmartz_2024	known	AB1219_Plaque	59.95	2.92	Gradient Boost (General Model)	11	918	3483	2547047440699126	1329613	37	1602	411	30123	None	moderate	MQ	d__Bacteria	p__Bacillota_I	c__Bacilli_A	o__Erysipelotrichales	f__Erysipelotrichaceae	g__Bulleidia	Bulleidia sp015256775	Plaque
AB1219_Plaque.24	AB1021_Stool.19	965495	Schmartz_2024	known	AB1219_Plaque	99.99	0.07	Neural Network (Specific Model)	11	882	244927	3.20172e+16	2038342	39	1874	16	346339	None	near	HQ	d__Bacteria	p__Bacillota_C	c__Negativicutes	o__Veillonellales	f__Veillonellaceae	g__Veillonella	Veillonella nakazawae	Plaque
AB1219_Plaque.3	AB1023_Forehead.1	973486	Schmartz_2024	known	AB1219_Plaque	93.73	0.5	Neural Network (Specific Model)	11	89	49286	3.19018e+16	2132046	31	1985	63	256098	None	near	HQ	d__Bacteria	p__Fusobacteriota	c__Fusobacteriia	o__Fusobacteriales	f__Leptotrichiaceae	g__Leptotrichia_A	Leptotrichia_A sp000469505	Plaque
AB1219_Plaque.31	CM_periimplantitis__SP_283SPI_T016__bin_8	96372	Pasolli_2019	known	AB1219_Plaque	99.43	0.01	Neural Network (Specific Model)	11	873	61161	345326076439284	2451298	4	2067	58	149108	None	near	HQ	d__Bacteria	p__Bacteroidota	c__Bacteroidia	o__Flavobacteriales	f__Flavobacteriaceae	g__Capnocytophaga	Capnocytophaga ochracea	Plaque
AB1219_Plaque.37	AB1056_Throat.16	966587	Schmartz_2024	known	AB1219_Plaque	58.61	1.69	Neural Network (Specific Model)	11	875	3696	2366098484848485	1281323	4	1584	382	24734	None	moderate	MQ	d__Bacteria	p__Campylobacterota	c__Campylobacteria	o__Campylobacterales	f__Campylobacteraceae	g__Campylobacter_A	Campylobacter_A concisus_T	Plaque
AB1219_Plaque.44	HMP_2012__SRS018394__bin_25	96983	Pasolli_2019	known	AB1219_Plaque	99.89	0.08	Neural Network (Specific Model)	11	929	763780	3109409448818898	763780	48	762	1	763780	None	near	HQ	d__Bacteria	p__Patescibacteria	c__Saccharimonadia	o__Saccharimonadales	f__Nanosynbacteraceae	g__Nanosynbacter		Plaque
AB1219_Plaque.47	AB1005_Plaque.25	984792	Schmartz_2024	known	AB1219_Plaque	93.71	0.13	Neural Network (Specific Model)	11	887	233325	3008411111111111	1828381	38	1800	14	493675	None	near	HQ	d__Bacteria	p__Bacillota	c__Bacilli	o__Lactobacillales	f__Streptococcaceae	g__Streptococcus	Streptococcus intermedius	Plaque
AB1219_Plaque.7	AB1219_Plaque.20	99993	Schmartz_2024	known	AB1219_Plaque	62.52	0.82	Gradient Boost (General Model)	11	911	3417	2.48781e+16	1793748	36	2196	574	15522	None	moderate	MQ	d__Bacteria	p__Bacillota_A	c__Clostridia	o__Lachnospirales	f__Lachnospiraceae	g__Lachnoanaerobaculum	Lachnoanaerobaculum sp000296385	Plaque
AB1219_Saliva.1	AB1056_Throat.16	97906	Schmartz_2024	known	AB1219_Saliva	99.33	0.63	Neural Network (Specific Model)	11	915	32557	2955533780299123	1872887	4	1939	98	101182	None	near	HQ	d__Bacteria	p__Campylobacterota	c__Campylobacteria	o__Campylobacterales	f__Campylobacteraceae	g__Campylobacter_A	Campylobacter_A concisus_T	Saliva
AB1219_Saliva.10	AB1219_Plaque.19	992376	Schmartz_2024	known	AB1219_Saliva	97.36	1.13	Gradient Boost (General Model)	11	918	108315	3.19947e+16	1871297	36	1793	26	258458	None	near	HQ	d__Bacteria	p__Bacillota_I	c__Bacilli_A	o__Erysipelotrichales	f__Erysipelotrichaceae	g__Bulleidia	Bulleidia sp015256775	Saliva
AB1219_Saliva.2	BackhedF_2015__SID42_B__bin_1	962473	Pasolli_2019	known	AB1219_Saliva	63.69	1.14	Neural Network (Specific Model)	11	891	75226	3.25285e+16	1450575	4	1326	37	338503	None	moderate	MQ	d__Bacteria	p__Bacillota	c__Bacilli	o__Lactobacillales	f__Streptococcaceae	g__Streptococcus	Streptococcus salivarius	Saliva
AB1219_Saliva.23	AB1773_Throat.19	969832	Schmartz_2024	known	AB1219_Saliva	97.13	0.45	Neural Network (Specific Model)	11	918	72223	3.24682e+16	1585199	41	1496	37	140462	None	near	HQ	d__Bacteria	p__Bacillota_A	c__Clostridia	o__Peptostreptococcales	f__Anaerovoracaceae	g__Eubacterium_B	Eubacterium_B sulci	Saliva
AB1219_Saliva.28	AB1702_Throat.26	968863	Schmartz_2024	known	AB1219_Saliva	76.93	0.2	Gradient Boost (General Model)	11	874	6857	2.7127e+16	1133664	39	1220	211	37005	None	substantial	MQ	d__Bacteria	p__Bacillota	c__Bacilli	o__Lactobacillales	f__Aerococcaceae	g__Granulicatella	Granulicatella sp001058355	Saliva
AB1219_Saliva.30	HMP_2012__SRS024580__bin_13	972114	Pasolli_2019	known	AB1219_Saliva	99.96	0.7	Neural Network (Specific Model)	11	899	12723	2.98339e+16	2442066	28	2457	289	69718	None	near	HQ	d__Bacteria	p__Fusobacteriota	c__Fusobacteriia	o__Fusobacteriales	f__Fusobacteriaceae	g__Fusobacterium	Fusobacterium pseudoperiodonticum	Saliva
AB1219_Saliva.35	AB1011_Throat.27	961416	Schmartz_2024	known	AB1219_Saliva	99.99	0	Neural Network (Specific Model)	11	913	98397	3.22809e+16	1919206	39	1810	35	340803	None	near	HQ	d__Bacteria	p__Pseudomonadota	c__Gammaproteobacteria	o__Enterobacterales	f__Pasteurellaceae	g__Haemophilus_D		Saliva
AB1219_Saliva.41	GCA_905369775.1	9711	GTDB	known	AB1219_Saliva	79.39	0.18	Neural Network (Specific Model)	11	867	58425	3692847364818617	1864725	57	1461	54	224413	None	substantial	MQ	d__Bacteria	p__Bacteroidota	c__Bacteroidia	o__Bacteroidales	f__Bacteroidaceae	g__Alloprevotella	Alloprevotella sp905369775	Saliva
AB1219_Saliva.47	MGYG000000023	963555	UHGG	known	AB1219_Saliva	81.52	4.11	Neural Network (Specific Model)	11	892	14707	3.00461e+16	1702683	42	1689	199	52467	None	substantial	MQ	d__Bacteria	p__Bacillota	c__Bacilli	o__Lactobacillales	f__Streptococcaceae	g__Streptococcus	Streptococcus parasanguinis	Saliva
AB1225_Plaque.20	GCA_900766185.1	9828	GTDB	known	AB1225_Plaque	50.92	2.07	Gradient Boost (General Model)	11	874	2844	2.50869e+16	1393112	37	1621	518	14333	None	moderate	MQ	d__Bacteria	p__Bacillota_A	c__Clostridia	o__Lachnospirales	f__Lachnospiraceae	g__Johnsonella	Johnsonella sp900766185	Plaque
AB1225_Plaque.21	AB1745_Plaque.20	987043	Schmartz_2024	known	AB1225_Plaque	56.99	1.08	Neural Network (Specific Model)	11	911	4095	2.63533e+16	1067806	5	1233	287	11042	None	moderate	MQ	d__Bacteria	p__Bacillota_C	c__Negativicutes	o__Veillonellales	f__Megasphaeraceae	g__Anaeroglobus	Anaeroglobus geminatus	Plaque
AB1225_Plaque.30	AB1040_Plaque.11	986573	Schmartz_2024	known	AB1225_Plaque	59.24	0.25	Neural Network (Specific Model)	11	817	3980	2.46958e+16	1400230	48	1549	383	38985	None	moderate	MQ	d__Bacteria	p__Campylobacterota	c__Campylobacteria	o__Campylobacterales	f__Campylobacteraceae	g__Campylobacter_B		Plaque
AB1225_Plaque.44	AB1251_Plaque.34	98242	Schmartz_2024	known	AB1225_Plaque	99.12	0.17	Neural Network (Specific Model)	11	877	211492	3.5964e+16	2541835	48	2068	24	368527	None	near	HQ	d__Bacteria	p__Bacteroidota	c__Bacteroidia	o__Bacteroidales	f__Bacteroidaceae	g__Prevotella	Prevotella sp013333935	Plaque
AB1225_Plaque.56	AB1498_Plaque.19	979434	Schmartz_2024	known	AB1225_Plaque	53.56	0.31	Neural Network (Specific Model)	11	877	4071	2907716241443684	1595739	45	1607	430	16058	None	moderate	MQ	d__Bacteria	p__Bacteroidota	c__Bacteroidia	o__Bacteroidales	f__Bacteroidaceae	g__Prevotella	Prevotella oris	Plaque
AB1225_Plaque.73	GCF_000160695.1	9813	GTDB	known	AB1225_Plaque	66.17	1.65	Neural Network (Specific Model)	11	909	6127	2845460483344219	1435584	58	1531	295	23763	None	moderate	MQ	d__Bacteria	p__Bacillota_C	c__Negativicutes	o__Selenomonadales	f__Selenomonadaceae	g__Centipeda	Centipeda flueggei	Plaque
AB1225_Saliva.13	AB1348_Saliva.27	972531	Schmartz_2024	known	AB1225_Saliva	71.2	0.12	Neural Network (Specific Model)	11	864	19911	3.33802e+16	1804758	42	1559	152	60785	None	substantial	MQ	d__Bacteria	p__Bacteroidota	c__Bacteroidia	o__Bacteroidales	f__Bacteroidaceae	g__Prevotella	Prevotella vespertina	Saliva
AB1225_Saliva.18	HMP_2012__SRS014271__bin_65	982331	Pasolli_2019	known	AB1225_Saliva	56.88	0.1	Neural Network (Specific Model)	11	885	2852	2512105760151086	899092	37	1059	324	8002	None	moderate	MQ	d__Bacteria	p__Campylobacterota	c__Campylobacteria	o__Campylobacterales	f__Campylobacteraceae	g__Campylobacter_B		Saliva
AB1225_Saliva.25	HMP_2012__SRS011115__bin_23	985476	Pasolli_2019	known	AB1225_Saliva	87.25	1.29	Gradient Boost (General Model)	11	882	4934	2.77391e+16	1302779	38	1383	311	18791	None	substantial	MQ	d__Bacteria	p__Bacillota_A	c__Clostridia	o__Peptostreptococcales	f__Peptostreptococcaceae	g__Peptostreptococcus	Peptostreptococcus sp900759325	Saliva
AB1225_Saliva.43	GCA_013333295.2	9677	GTDB	known	AB1225_Saliva	51.83	0.43	Neural Network (Specific Model)	4	88	318393	3.2377e+16	475124	36	431	4	318393	None	moderate	MQ	d__Bacteria	p__Patescibacteria	c__JAEDAM01	o__Absconditabacterales	f__Absconditicoccaceae	g__HOT-345	HOT-345 sp013333295	Saliva
AB1225_Saliva.58	GCF_900637555.1	9652	GTDB	known	AB1225_Saliva	57.08	0.59	Gradient Boost (General Model)	11	887	2812	2689818569903949	1701905	66	1874	620	9743	None	moderate	MQ	d__Bacteria	p__Pseudomonadota	c__Gammaproteobacteria	o__Burkholderiales	f__Burkholderiaceae	g__Lautropia	Lautropia mirabilis	Saliva
AB1225_Saliva.78	GCF_003048375.1	956	GTDB	known	AB1225_Saliva	70.51	2.07	Neural Network (Specific Model)	11	927	3916	2.49416e+16	1371796	4	1705	395	20225	None	substantial	MQ	d__Bacteria	p__Campylobacterota	c__Campylobacteria	o__Campylobacterales	f__Campylobacteraceae	g__Campylobacter_A	Campylobacter_A concisus_T	Saliva
AB1227_Plaque.16	GCA_937981355.1	9504	GTDB	known	AB1227_Plaque	99.79	0.42	Neural Network (Specific Model)	11	855	119420	285283542039356	1115885	51	1118	11	207754	None	near	HQ	d__Bacteria	p__Patescibacteria	c__Saccharimonadia	o__Saccharimonadales	f__Saccharimonadaceae	g__Saccharimonas	Saccharimonas sp937981355	Plaque
AB1227_Plaque.23	GCF_000210715.1	9671	GTDB	known	AB1227_Plaque	66.52	4.78	Gradient Boost (General Model)	11	886	3368	2624538106235566	1535360	65	1732	487	21352	None	moderate	MQ	d__Bacteria	p__Synergistota	c__Synergistia	o__Synergistales	f__Aminobacteriaceae	g__Fretibacterium	Fretibacterium fastidiosum	Plaque
AB1227_Plaque.3	GCF_003614945.1	9883	GTDB	known	AB1227_Plaque	96.52	0.1	Neural Network (Specific Model)	11	89	63368	3273634204275534	1856829	4	1684	48	172836	None	near	HQ	d__Bacteria	p__Bacteroidota	c__Bacteroidia	o__Flavobacteriales	f__Weeksellaceae	g__Bergeyella_A	Bergeyella_A cardium	Plaque
AB1227_Plaque.58	AB1266_Plaque.3	979085	Schmartz_2024	known	AB1227_Plaque	63.68	2.04	Gradient Boost (General Model)	11	912	4498	2.64617e+16	492316	37	567	131	14836	None	moderate	MQ	d__Bacteria	p__Patescibacteria	c__Saccharimonadia	o__Saccharimonadales	f__UBA10027	g__SDRW01	SDRW01 sp007845485	Plaque
AB1227_Plaque.59	GCF_000174815.1	968	GTDB	known	AB1227_Plaque	71.45	0.1	Neural Network (Specific Model)	11	889	241008	3596217133163698	1428386	48	1179	9	502650	None	substantial	MQ	d__Bacteria	p__Bacteroidota	c__Bacteroidia	o__Bacteroidales	f__Porphyromonadaceae	g__Porphyromonas	Porphyromonas endodontalis	Plaque
AB1227_Plaque.63	HMP_2012__SRS017139__bin_28	99266	Pasolli_2019	known	AB1227_Plaque	94.26	0.08	Neural Network (Specific Model)	11	89	39686	3186313164893617	3223529	66	3008	211	207238	None	near	HQ	d__Bacteria	p__Actinomycetota	c__Actinomycetes	o__Propionibacteriales	f__Propionibacteriaceae	g__Arachnia	Arachnia sp905372155	Plaque
AB1227_Plaque.67	AB1227_Plaque.15	999998	Schmartz_2024	known	AB1227_Plaque	89.75	0.11	Neural Network (Specific Model)	11	887	39130	3270878594249201	691702	51	626	25	100789	None	substantial	MQ	d__Bacteria	p__Patescibacteria	c__Saccharimonadia	o__Saccharimonadales	f__Nanoperiomorbaceae	g__Nanoperiomorbus		Plaque
AB1227_Plaque.82	GCF_900240305.1	988	GTDB	known	AB1227_Plaque	58.96	0.69	Neural Network (Specific Model)	11	864	3127	279527724665392	1520784	66	1569	513	18034	None	moderate	MQ	d__Bacteria	p__Pseudomonadota	c__Gammaproteobacteria	o__Burkholderiales	f__Burkholderiaceae	g__Ottowia	Ottowia massiliensis	Plaque
AB1227_Plaque.88	AB1227_Plaque.36	999976	Schmartz_2024	known	AB1227_Plaque	56.35	1.18	Neural Network (Specific Model)	11	877	3653	3085416666666667	1189277	56	1128	352	14760	None	moderate	MQ	d__Bacteria	p__Bacteroidota	c__Bacteroidia	o__Bacteroidales	f__Porphyromonadaceae	g__Porphyromonas	Porphyromonas sp915070105	Plaque
AB1227_Saliva.1	GCF_014647755.1	9551	GTDB	known	AB1227_Saliva	81.16	0.12	Neural Network (Specific Model)	11	866	75519	3733436123348018	1760118	56	1362	54	273766	None	substantial	MQ	d__Bacteria	p__Bacteroidota	c__Bacteroidia	o__Bacteroidales	f__Porphyromonadaceae	g__Porphyromonas	Porphyromonas pasteri	Saliva
AB1227_Saliva.11	AB1227_Plaque.56	999199	Schmartz_2024	known	AB1227_Saliva	62.91	2.76	Neural Network (Specific Model)	11	858	3897	2306344993968637	666847	52	829	193	10622	None	moderate	MQ	d__Bacteria	p__Patescibacteria	c__Saccharimonadia	o__Saccharimonadales	f__Saccharimonadaceae	g__Saccharimonas		Saliva
AB1227_Saliva.18	AB1227_Saliva.17	999689	Schmartz_2024	known	AB1227_Saliva	58.74	1.93	Neural Network (Specific Model)	11	916	3695	2616818181818182	1035278	41	1210	304	14577	None	moderate	MQ	d__Bacteria	p__Bacillota_A	c__Clostridia	o__Peptostreptococcales	f__Anaerovoracaceae	g__Eubacterium_B	Eubacterium_B sp938049335	Saliva
AB1227_Saliva.19	GCF_014931275.1	9676	GTDB	known	AB1227_Saliva	72.74	1.12	Neural Network (Specific Model)	11	855	7113	2.69393e+16	1427989	4	1512	277	27072	None	substantial	MQ	d__Bacteria	p__Pseudomonadota	c__Gammaproteobacteria	o__Enterobacterales	f__Pasteurellaceae	g__Haemophilus_D	Haemophilus_D sp014931275	Saliva
AB1227_Saliva.20	AB1266_Plaque.3	977471	Schmartz_2024	known	AB1227_Saliva	67.1	0.92	Neural Network (Specific Model)	11	91	4092	2541508078994614	465593	37	557	135	11050	None	moderate	MQ	d__Bacteria	p__Patescibacteria	c__Saccharimonadia	o__Saccharimonadales	f__UBA10027	g__SDRW01	SDRW01 sp007845485	Saliva
AB1229_Plaque.12	AB1685_Plaque.23	965374	Schmartz_2024	known	AB1229_Plaque	99.97	0.12	Neural Network (Specific Model)	11	897	181650	3.25008e+16	2333762	42	2149	20	427555	None	near	HQ	d__Bacteria	p__Pseudomonadota	c__Gammaproteobacteria	o__Enterobacterales	f__Pasteurellaceae	g__Aggregatibacter	Aggregatibacter aphrophilus	Plaque
AB1229_Plaque.38	GCA_013333795.2	9855	GTDB	known	AB1229_Plaque	94.68	0.49	Neural Network (Specific Model)	11	904	608982	3004315789473684	850451	48	855	4	608982	None	near	HQ	d__Bacteria	p__Patescibacteria	c__Saccharimonadia	o__Saccharimonadales	f__Saccharimonadaceae	g__Saccharimonas	Saccharimonas sp013333795	Plaque
AB1229_Plaque.51	GCF_000429245.1	9878	GTDB	known	AB1229_Plaque	54.63	1.34	Neural Network (Specific Model)	11	878	3677	2722694677871148	1657370	7	1785	494	17580	None	moderate	MQ	d__Bacteria	p__Actinomycetota	c__Actinomycetes	o__Actinomycetales	f__Actinomycetaceae	g__Pauljensenia	Pauljensenia georgiae	Plaque
AB1229_Plaque.6	HMP_2012__SRS013950__bin_6	98218	Pasolli_2019	known	AB1229_Plaque	79.82	0.68	Neural Network (Specific Model)	11	901	5839	3.10553e+16	2099814	5	2033	446	18132	None	substantial	MQ	d__Bacteria	p__Spirochaetota	c__Spirochaetia	o__Treponematales	f__Treponemataceae	g__Treponema_D	Treponema_D buccale	Plaque
AB1229_Plaque.8	AB1229_Plaque.11	99995	Schmartz_2024	known	AB1229_Plaque	56.96	1.45	Neural Network (Specific Model)	11	82	3301	2.38614e+16	1242233	54	1426	412	10954	None	moderate	MQ	d__Bacteria	p__Pseudomonadota	c__Gammaproteobacteria	o__Burkholderiales	f__Neisseriaceae	g__Kingella_B	Kingella_B sp030527935	Plaque
AB1229_Saliva.10	AB1229_Saliva.24	999967	Schmartz_2024	known	AB1229_Saliva	60.89	2.21	Neural Network (Specific Model)	11	86	3320	2.4082e+16	1012205	37	1208	334	10899	None	moderate	MQ	d__Bacteria	p__Campylobacterota	c__Campylobacteria	o__Campylobacterales	f__Campylobacteraceae	g__Campylobacter_B		Saliva
AB1229_Saliva.18	MGYG000004591	972894	UHGG	known	AB1229_Saliva	51.31	3.1	Gradient Boost (General Model)	11	915	3014	2.54856e+16	1019873	37	1223	347	12230	None	moderate	MQ	d__Bacteria	p__Bacillota_I	c__Bacilli_A	o__Erysipelotrichales	f__Erysipelotrichaceae	g__Bulleidia	Bulleidia sp015256775	Saliva
AB1229_Saliva.26	AB1043_Saliva.37	966424	Schmartz_2024	known	AB1229_Saliva	64.85	0.51	Gradient Boost (General Model)	11	857	4707	2.64879e+16	1092207	4	1180	280	20922	None	moderate	MQ	d__Bacteria	p__Bacillota	c__Bacilli	o__Lactobacillales	f__Aerococcaceae	g__Granulicatella	Granulicatella sp001058355	Saliva
AB1229_Saliva.37	AB1232_Saliva.24	981123	Schmartz_2024	known	AB1229_Saliva	62.79	2.86	Neural Network (Specific Model)	11	865	4286	2.78113e+16	1638234	58	1701	414	21819	None	moderate	MQ	d__Bacteria	p__Actinomycetota	c__Actinomycetes	o__Actinomycetales	f__Micrococcaceae	g__Rothia	Rothia aeria	Saliva
AB1231_Plaque.11	AB1231_Plaque.4	999998	Schmartz_2024	known	AB1231_Plaque	96.33	0.17	Neural Network (Specific Model)	11	894	105989	3.41252e+16	757606	51	663	14	124288	None	near	HQ	d__Bacteria	p__Patescibacteria	c__Saccharimonadia	o__Saccharimonadales	f__Nanoperiomorbaceae	g__Nanoperiomorbus		Plaque
AB1231_Plaque.14	AB1231_Plaque.31	999982	Schmartz_2024	known	AB1231_Plaque	55.47	0.5	Neural Network (Specific Model)	11	885	3290	2.68264e+16	1236445	62	1362	395	14441	None	moderate	MQ	d__Bacteria	p__Actinomycetota	c__Coriobacteriia	o__Coriobacteriales	f__Eggerthellaceae	g__Slackia	Slackia exigua	Plaque
AB1231_Plaque.25	AB1231_Plaque.37	999998	Schmartz_2024	known	AB1231_Plaque	96.42	0.28	Neural Network (Specific Model)	11	916	56998	2929112426035503	807967	51	845	17	159929	None	near	HQ	d__Bacteria	p__Patescibacteria	c__Saccharimonadia	o__Saccharimonadales	f__Nanosynbacteraceae	g__Nanosynbacter	Nanosynbacter sp013099015	Plaque
AB1231_Plaque.27	AB1234_Plaque.54	988723	Schmartz_2024	known	AB1231_Plaque	98.86	0.11	Neural Network (Specific Model)	11	93	178043	3.04877e+16	741964	48	756	8	205271	None	near	HQ	d__Bacteria	p__Patescibacteria	c__Saccharimonadia	o__Saccharimonadales	f__Nanosynbacteraceae	g__Nanosynbacter		Plaque
AB1231_Plaque.42	CM_periimplantitis__SP_344SPT_T016__bin_33	99002	Pasolli_2019	known	AB1231_Plaque	65.61	2.09	Gradient Boost (General Model)	11	879	3394	2.70367e+16	1671023	69	1815	533	14251	None	moderate	MQ	d__Bacteria	p__Actinomycetota	c__Actinomycetes	o__Actinomycetales	f__Actinomycetaceae	g__Peptidiphaga	Peptidiphaga sp000466165	Plaque
AB1231_Plaque.54	AB1759_Throat.2	951972	Schmartz_2024	known	AB1231_Plaque	94.14	0.44	Neural Network (Specific Model)	11	904	492942	3.03459e+16	851242	48	847	4	492942	None	near	HQ	d__Bacteria	p__Patescibacteria	c__Saccharimonadia	o__Saccharimonadales	f__Saccharimonadaceae	g__Saccharimonas		Plaque
AB1231_Plaque.72	GCF_000160135.1	9701	GTDB	known	AB1231_Plaque	70	0.73	Gradient Boost (General Model)	11	893	3462	2735286783042394	1471047	57	1604	471	11748	None	moderate	MQ	d__Bacteria	p__Bacillota_A	c__Clostridia	o__Lachnospirales	f__Lachnospiraceae	g__Oribacterium	Oribacterium sp000160135	Plaque
AB1231_Saliva.21	CM_cf__CF_TNFC022IS_t3M16__bin_1	972821	Pasolli_2019	known	AB1231_Saliva	82.9	0.11	Neural Network (Specific Model)	11	913	52699	3359470246734398	1519349	4	1378	54	155647	None	substantial	MQ	d__Bacteria	p__Bacillota_A	c__Clostridia	o__Peptostreptococcales	f__Anaerovoracaceae	g__Eubacterium_B	Eubacterium_B sulci	Saliva
AB1231_Saliva.3	AB1702_Throat.26	970586	Schmartz_2024	known	AB1231_Saliva	69.85	0.07	Gradient Boost (General Model)	11	851	5928	2663974943052392	823928	39	878	164	35469	None	moderate	MQ	d__Bacteria	p__Bacillota	c__Bacilli	o__Lactobacillales	f__Aerococcaceae	g__Granulicatella	Granulicatella sp001058355	Saliva
AB1231_Saliva.33	GCA_013333295.2	9576	GTDB	known	AB1231_Saliva	54.44	4.86	Gradient Boost (General Model)	4	89	3026	2.54669e+16	629725	36	735	220	12609	None	moderate	MQ	d__Bacteria	p__Patescibacteria	c__JAEDAM01	o__Absconditabacterales	f__Absconditicoccaceae	g__HOT-345	HOT-345 sp013333295	Saliva
AB1231_Saliva.34	AB1392_Throat.37	983992	Schmartz_2024	known	AB1231_Saliva	100	0.1	Gradient Boost (General Model)	11	879	38948	3.26101e+16	1695507	37	1525	70	123142	None	perfect	HQ	d__Bacteria	p__Bacillota_A	c__Clostridia	o__Peptostreptococcales	f__Peptostreptococcaceae	g__Peptostreptococcus	Peptostreptococcus sp900759325	Saliva
AB1231_Saliva.40	AB1133_Saliva.2	964976	Schmartz_2024	known	AB1231_Saliva	65.67	0.06	Neural Network (Specific Model)	11	855	5048	2.55084e+16	1292510	4	1445	316	20519	None	moderate	MQ	d__Bacteria	p__Pseudomonadota	c__Gammaproteobacteria	o__Enterobacterales	f__Pasteurellaceae	g__Haemophilus_D	Haemophilus_D sp014931275	Saliva
AB1231_Saliva.41	AB1231_Saliva.12	999972	Schmartz_2024	known	AB1231_Saliva	67.98	1.19	Gradient Boost (General Model)	11	936	3598	2.74889e+16	970915	4	1105	285	14319	None	moderate	MQ	d__Bacteria	p__Bacillota_A	c__Clostridia	o__Peptostreptococcales	f__Anaerovoracaceae	g__JABZIP01	JABZIP01 sp015258265	Saliva
AB1232_Plaque.17	CM_periimplantitis__SP_143SPI_T016__bin_16	967857	Pasolli_2019	known	AB1232_Plaque	52.01	2.17	Neural Network (Specific Model)	11	87	6288	2938899952584163	2133137	68	2109	451	53521	None	moderate	MQ	d__Bacteria	p__Actinomycetota	c__Actinomycetes	o__Actinomycetales	f__Actinomycetaceae	g__Actinomyces	Actinomyces oris_C	Plaque
AB1232_Plaque.21	GCF_000194945.1	9564	GTDB	known	AB1232_Plaque	58.52	2.81	Neural Network (Specific Model)	11	869	3753	2.41665e+16	1295464	44	1557	377	12857	None	moderate	MQ	d__Bacteria	p__Bacillota	c__Bacilli	o__Lactobacillales	f__Streptococcaceae	g__Streptococcus	Streptococcus sanguinis	Plaque
AB1232_Plaque.23	AB4181_Saliva.11	978616	Schmartz_2024	known	AB1232_Plaque	72.53	3.99	Neural Network (Specific Model)	11	857	5360	2804389709906951	1791537	54	1827	402	20977	None	substantial	MQ	d__Bacteria	p__Actinomycetota	c__Actinomycetes	o__Actinomycetales	f__Micrococcaceae	g__Rothia	Rothia dentocariosa	Plaque
AB1232_Plaque.43	AB1232_Plaque.39	999721	Schmartz_2024	known	AB1232_Plaque	64.02	2.24	Neural Network (Specific Model)	11	942	3066	2.76678e+16	1292400	45	1470	440	15889	None	moderate	MQ	d__Bacteria	p__Spirochaetota	c__Spirochaetia	o__Treponematales	f__Treponemataceae	g__Treponema_C	Treponema_C lecithinolyticum	Plaque
AB1232_Plaque.5	GCF_000159995.1	9665	GTDB	known	AB1232_Plaque	59.92	0.04	Neural Network (Specific Model)	11	827	21741	3.33057e+16	1450679	49	1203	100	57123	None	moderate	MQ	d__Bacteria	p__Bacteroidota	c__Bacteroidia	o__Bacteroidales	f__Bacteroidaceae	g__Alloprevotella	Alloprevotella tannerae	Plaque
AB1232_Plaque.61	AB1232_Plaque.48	999999	Schmartz_2024	known	AB1232_Plaque	98.76	0.16	Neural Network (Specific Model)	11	893	54847	3.38278e+16	841645	5	742	23	132764	None	near	HQ	d__Bacteria	p__Patescibacteria	c__Saccharimonadia	o__Saccharimonadales	f__Nanoperiomorbaceae	g__Nanoperiomorbus		Plaque
AB1232_Saliva.1	AB1232_Saliva.28	999398	Schmartz_2024	known	AB1232_Saliva	53.93	0.26	Neural Network (Specific Model)	11	932	2791	2.35012e+16	967519	41	1282	365	9590	None	moderate	MQ	d__Bacteria	p__Campylobacterota	c__Campylobacteria	o__Campylobacterales	f__Campylobacteraceae	g__Campylobacter_A	Campylobacter_A concisus_C	Saliva
AB1232_Saliva.14	AB1232_Saliva.4	9993	Schmartz_2024	known	AB1232_Saliva	87.95	1.93	Gradient Boost (General Model)	11	88	6976	274149300155521	599938	41	643	105	25719	None	substantial	MQ	d__Bacteria	p__Patescibacteria	c__Saccharimonadia	o__Saccharimonadales	f__Nanosyncoccaceae	g__Nanosyncoccus		Saliva
AB1232_Saliva.21	AB1237_Saliva.11	980434	Schmartz_2024	known	AB1232_Saliva	92.7	1.18	Neural Network (Specific Model)	11	894	19664	3.29718e+16	2195830	49	1988	174	82806	None	near	HQ	d__Bacteria	p__Bacillota_A	c__Clostridia	o__Lachnospirales	f__Lachnospiraceae	g__Butyrivibrio	Butyrivibrio sp015258065	Saliva
AB1232_Saliva.40	AB1232_Saliva.15	999765	Schmartz_2024	known	AB1232_Saliva	63.59	2.14	Gradient Boost (General Model)	11	917	3868	2614356936416185	1181109	56	1384	336	14231	None	moderate	MQ	d__Bacteria	p__Bacillota_A	c__Clostridia	o__Lachnospirales	f__Lachnospiraceae	g__Moryella	Moryella longum_A	Saliva
AB1233_Plaque.17	AB1005_Plaque.25	985356	Schmartz_2024	known	AB1233_Plaque	97.6	0.3	Neural Network (Specific Model)	11	888	127193	3073137359700695	1938986	38	1871	20	221810	None	near	HQ	d__Bacteria	p__Bacillota	c__Bacilli	o__Lactobacillales	f__Streptococcaceae	g__Streptococcus	Streptococcus intermedius	Plaque
AB1233_Plaque.38	AB1233_Plaque.22	999985	Schmartz_2024	known	AB1233_Plaque	66.55	0.18	Gradient Boost (General Model)	11	839	3523	2.53048e+16	1627655	6	1803	491	13882	None	moderate	MQ	d__Bacteria	p__Pseudomonadota	c__Gammaproteobacteria	o__Burkholderiales	f__Rhodocyclaceae	g__Propionivibrio	Propionivibrio sp938040985	Plaque
AB1233_Plaque.4	AB1233_Plaque.35	999964	Schmartz_2024	known	AB1233_Plaque	64.44	0.86	Gradient Boost (General Model)	11	896	2927	2.57912e+16	1459951	65	1695	517	9982	None	moderate	MQ	d__Bacteria	p__Synergistota	c__Synergistia	o__Synergistales	f__Aminobacteriaceae	g__CAJPSE01	CAJPSE01 sp938040765	Plaque
AB1233_Plaque.43	GCF_900460955.1	9729	GTDB	known	AB1233_Plaque	79.61	2.77	Gradient Boost (General Model)	11	882	25501	2.92894e+16	2215705	59	2230	144	109287	None	substantial	MQ	d__Bacteria	p__Pseudomonadota	c__Gammaproteobacteria	o__Cardiobacteriales	f__Cardiobacteriaceae	g__Cardiobacterium	Cardiobacterium valvarum	Plaque
AB1233_Plaque.48	AB1306_Plaque.4	986434	Schmartz_2024	known	AB1233_Plaque	64.92	3.84	Gradient Boost (General Model)	11	884	3449	2.55418e+16	1804368	61	2086	570	12451	None	moderate	MQ	d__Bacteria	p__Pseudomonadota	c__Gammaproteobacteria	o__Cardiobacteriales	f__Cardiobacteriaceae	g__Cardiobacterium	Cardiobacterium sp938028185	Plaque
AB1233_Plaque.50	AB1096_Throat.31	963474	Schmartz_2024	known	AB1233_Plaque	68.94	0.28	Neural Network (Specific Model)	11	823	5727	2.92389e+16	1340539	61	1259	281	26351	None	moderate	MQ	d__Bacteria	p__Actinomycetota	c__Actinomycetes	o__Actinomycetales	f__Micrococcaceae	g__Rothia	Rothia mucilaginosa	Plaque
AB1233_Plaque.57	AB1233_Plaque.30	100	Schmartz_2024	known	AB1233_Plaque	98.49	0.21	Neural Network (Specific Model)	11	924	185167	2989180722891566	803532	51	830	6	303039	None	near	HQ	d__Bacteria	p__Patescibacteria	c__Saccharimonadia	o__Saccharimonadales	f__Nanosynbacteraceae	g__Nanosynbacter		Plaque
AB1233_Saliva.20	GCA_018382395.1	9603	GTDB	known	AB1233_Saliva	57.3	0.12	Neural Network (Specific Model)	11	86	3798	2427072758037225	999742	39	1182	292	13530	None	moderate	MQ	d__Bacteria	p__Pseudomonadota	c__Gammaproteobacteria	o__Enterobacterales	f__Pasteurellaceae	g__Haemophilus_D	Haemophilus_D parainfluenzae_R	Saliva
AB1233_Saliva.38	AB1233_Saliva.10	999204	Schmartz_2024	known	AB1233_Saliva	51.54	0.17	Neural Network (Specific Model)	11	917	4366	2852912142152024	943706	56	1013	247	15668	None	moderate	MQ	d__Bacteria	p__Actinomycetota	c__Actinomycetes	o__Actinomycetales	f__Actinomycetaceae	g__Pauljensenia	Pauljensenia sp938030835	Saliva
AB1233_Saliva.8	AB1373_Plaque.4	975371	Schmartz_2024	known	AB1233_Saliva	64.72	0.55	Neural Network (Specific Model)	11	85	7379	2.9739e+16	1454998	55	1387	241	27172	None	moderate	MQ	d__Bacteria	p__Actinomycetota	c__Actinomycetes	o__Actinomycetales	f__Micrococcaceae	g__Rothia	Rothia dentocariosa	Saliva
AB1234_Plaque.28	AB1234_Plaque.3	99999	Schmartz_2024	known	AB1234_Plaque	57.29	1.95	Gradient Boost (General Model)	11	907	3325	2.5274e+16	1004393	56	1204	323	11390	None	moderate	MQ	d__Bacteria	p__Bacillota_C	c__Negativicutes	o__Selenomonadales	f__Selenomonadaceae	g__CAJPQU01	CAJPQU01 sp905373705	Plaque
AB1234_Plaque.3	AB1039_Plaque.25	976931	Schmartz_2024	known	AB1234_Plaque	90.05	0.95	Neural Network (Specific Model)	11	928	23465	2931	671473	44	710	34	50159	None	near	HQ	d__Bacteria	p__Patescibacteria	c__Saccharimonadia	o__Saccharimonadales	f__Nanosynbacteraceae	g__Nanosynbacter		Plaque
AB1234_Plaque.39	AB1720_Plaque.12	994453	Schmartz_2024	known	AB1234_Plaque	97.74	0.18	Gradient Boost (General Model)	11	911	618839	3.16183e+16	1927611	37	1854	8	622706	None	near	HQ	d__Bacteria	p__Bacillota_I	c__Bacilli_A	o__Erysipelotrichales	f__Erysipelotrichaceae	g__Bulleidia	Bulleidia moorei	Plaque
AB1234_Plaque.51	GCF_002096675.1	9522	GTDB	known	AB1234_Plaque	65.75	0.85	Neural Network (Specific Model)	11	908	14088	2890304568527919	1313962	42	1379	153	57230	None	moderate	MQ	d__Bacteria	p__Bacillota	c__Bacilli	o__Lactobacillales	f__Streptococcaceae	g__Streptococcus	Streptococcus dentisani	Plaque
AB1234_Plaque.7	GCF_000429245.1	970	GTDB	known	AB1234_Plaque	54.5	2.36	Neural Network (Specific Model)	11	884	2603	2.67757e+16	1452871	71	1603	568	11011	None	moderate	MQ	d__Bacteria	p__Actinomycetota	c__Actinomycetes	o__Actinomycetales	f__Actinomycetaceae	g__Pauljensenia	Pauljensenia georgiae	Plaque
AB1234_Plaque.74	GCF_900636475.1	9609	GTDB	known	AB1234_Plaque	56.97	0	Neural Network (Specific Model)	11	887	112329	3.04963e+16	1055152	38	1025	13	182714	None	moderate	MQ	d__Bacteria	p__Bacillota	c__Bacilli	o__Lactobacillales	f__Streptococcaceae	g__Streptococcus	Streptococcus anginosus	Plaque
AB1234_Plaque.78	AB1727_Plaque.38	994149	Schmartz_2024	known	AB1234_Plaque	99.83	0.26	Neural Network (Specific Model)	11	9	74610	3.35401e+16	2217306	58	1986	46	251030	None	near	HQ	d__Bacteria	p__Bacillota_C	c__Negativicutes	o__Selenomonadales	f__Selenomonadaceae	g__CAJPQU01		Plaque
AB1234_Plaque.83	HMP_2012__SRS045197__bin_7	967732	Pasolli_2019	known	AB1234_Plaque	68.6	0.1	Neural Network (Specific Model)	11	828	4663	3097674661105318	2148810	48	1918	519	18409	None	moderate	MQ	d__Bacteria	p__Bacteroidota	c__Bacteroidia	o__Bacteroidales	f__Bacteroidaceae	g__Prevotella	Prevotella loescheii	Plaque
AB1234_Saliva.12	FerrettiP_2018__CA_C10007MS2097SA_t0M15__bin_23	963328	Pasolli_2019	known	AB1234_Saliva	61.23	2.87	Neural Network (Specific Model)	11	869	4693	2545568181818182	1312895	39	1496	332	22683	None	moderate	MQ	d__Bacteria	p__Pseudomonadota	c__Gammaproteobacteria	o__Enterobacterales	f__Pasteurellaceae	g__Haemophilus_D	Haemophilus_D sp019423025	Saliva
AB1234_Saliva.20	AB1234_Throat.31	973752	Schmartz_2024	known	AB1234_Saliva	76.67	0.29	Gradient Boost (General Model)	11	85	6111	2667797051170859	1083522	39	1153	220	24314	None	substantial	MQ	d__Bacteria	p__Bacillota	c__Bacilli	o__Lactobacillales	f__Aerococcaceae	g__Granulicatella	Granulicatella sp902479935	Saliva
AB1234_Saliva.29	AB1154_Saliva.11	984174	Schmartz_2024	known	AB1234_Saliva	92.51	1.01	Gradient Boost (General Model)	11	911	5506	2675818965517241	1224724	46	1392	267	17267	None	near	HQ	d__Bacteria	p__Bacillota_C	c__Negativicutes	o__Veillonellales	f__Megasphaeraceae	g__Anaeroglobus	Anaeroglobus micronuciformis	Saliva
AB1234_Saliva.39	HMP_2012__SRS075404__bin_20	963085	Pasolli_2019	known	AB1234_Saliva	50.07	1.84	Gradient Boost (General Model)	11	863	7138	3016062931696086	1364327	43	1303	259	27115	None	moderate	MQ	d__Bacteria	p__Bacillota_A	c__Clostridia	o__Lachnospirales	f__Lachnospiraceae	g__Oribacterium		Saliva
AB1234_Saliva.52	GCF_000180035.1	959	GTDB	known	AB1234_Saliva	54.31	4.09	Neural Network (Specific Model)	11	883	8294	2.83273e+16	1164509	43	1213	187	25793	None	moderate	MQ	d__Bacteria	p__Bacillota	c__Bacilli	o__Lactobacillales	f__Streptococcaceae	g__Streptococcus	Streptococcus parasanguinis_C	Saliva
AB1237_Plaque.13	AB1237_Plaque.32	999994	Schmartz_2024	known	AB1237_Plaque	83.19	0.48	Gradient Boost (General Model)	11	911	4398	2707842712842713	1233470	5	1386	302	25899	None	substantial	MQ	d__Bacteria	p__Bacillota_C	c__Negativicutes	o__Veillonellales	f__Megasphaeraceae	g__Anaeroglobus	Anaeroglobus geminatus	Plaque
AB1237_Plaque.16	AB1076_Plaque.6	993673	Schmartz_2024	known	AB1237_Plaque	60.73	1.26	Gradient Boost (General Model)	11	827	3649	2.3453e+16	1376773	55	1620	420	14110	None	moderate	MQ	d__Bacteria	p__Pseudomonadota	c__Gammaproteobacteria	o__Burkholderiales	f__Neisseriaceae	g__Kingella_B	Kingella_B oralis	Plaque
AB1237_Plaque.18	AB1268_Throat.13	967135	Schmartz_2024	known	AB1237_Plaque	79.49	0.21	Neural Network (Specific Model)	11	829	8576	3162837393021725	1737038	6	1519	272	44037	None	substantial	MQ	d__Bacteria	p__Actinomycetota	c__Actinomycetes	o__Actinomycetales	f__Micrococcaceae	g__Rothia	Rothia mucilaginosa	Plaque
AB1237_Plaque.21	CM_periimplantitis__SP_602SPI_T016__bin_4	984708	Pasolli_2019	known	AB1237_Plaque	91.51	0.94	Neural Network (Specific Model)	11	831	16341	2.69619e+16	1994004	56	2051	190	51706	None	near	HQ	d__Bacteria	p__Pseudomonadota	c__Gammaproteobacteria	o__Burkholderiales	f__Neisseriaceae	g__Eikenella	Eikenella corrodens	Plaque
AB1237_Plaque.23	AB1237_Plaque.43	999992	Schmartz_2024	known	AB1237_Plaque	57.76	2.18	Neural Network (Specific Model)	11	849	3871	3.1172e+16	1811360	48	1648	517	13777	None	moderate	MQ	d__Bacteria	p__Bacteroidota	c__Bacteroidia	o__Bacteroidales	f__Bacteroidaceae	g__Prevotella	Prevotella loescheii	Plaque
AB1237_Plaque.36	AB1398_Plaque.4	973197	Schmartz_2024	known	AB1237_Plaque	99.82	0.03	Neural Network (Specific Model)	11	823	513490	3046019124308002	2202457	49	1987	10	669523	None	near	HQ	d__Bacteria	p__Campylobacterota	c__Campylobacteria	o__Campylobacterales	f__Campylobacteraceae	g__Campylobacter_B		Plaque
AB1237_Saliva.19	GCA_015258065.1	979	GTDB	known	AB1237_Saliva	99.9	0.17	Neural Network (Specific Model)	11	91	127894	3452098273572377	2564966	49	2259	46	245178	None	near	HQ	d__Bacteria	p__Bacillota_A	c__Clostridia	o__Lachnospirales	f__Lachnospiraceae	g__Butyrivibrio	Butyrivibrio sp015258065	Saliva
AB1237_Saliva.41	AB1237_Saliva.7	999899	Schmartz_2024	known	AB1237_Saliva	50.18	0.03	Neural Network (Specific Model)	11	926	2588	2.31848e+16	853467	41	1140	330	7215	None	moderate	MQ	d__Bacteria	p__Campylobacterota	c__Campylobacteria	o__Campylobacterales	f__Campylobacteraceae	g__Campylobacter_A	Campylobacter_A concisus_C	Saliva
AB1239_Plaque.15	GCF_900240305.1	9833	GTDB	known	AB1239_Plaque	51.47	0.91	Neural Network (Specific Model)	11	833	2919	2.40546e+16	1332460	65	1542	482	12367	None	moderate	MQ	d__Bacteria	p__Pseudomonadota	c__Gammaproteobacteria	o__Burkholderiales	f__Burkholderiaceae	g__Ottowia	Ottowia massiliensis	Plaque
AB1239_Plaque.24	AB1305_Saliva.5	974401	Schmartz_2024	known	AB1239_Plaque	64.52	3.29	Neural Network (Specific Model)	11	891	4117	2780322751322751	1765009	67	1890	490	15736	None	moderate	MQ	d__Bacteria	p__Actinomycetota	c__Actinomycetes	o__Actinomycetales	f__Actinomycetaceae	g__Pauljensenia	Pauljensenia sp000185285	Plaque
AB1239_Plaque.55	GCF_937949835.1	9637	GTDB	known	AB1239_Plaque	55.06	0.37	Neural Network (Specific Model)	11	858	3873	2.5744e+16	968717	48	1079	278	13126	None	moderate	MQ	d__Bacteria	p__Campylobacterota	c__Campylobacteria	o__Campylobacterales	f__Campylobacteraceae	g__Campylobacter_B	Campylobacter_B sp937949835	Plaque
AB1239_Plaque.72	GCF_007990505.1	9783	GTDB	known	AB1239_Plaque	52.17	1.35	Neural Network (Specific Model)	11	904	3219	2.49737e+16	997490	33	1206	327	16954	None	moderate	MQ	d__Bacteria	p__Fusobacteriota	c__Fusobacteriia	o__Fusobacteriales	f__Leptotrichiaceae	g__Pseudoleptotrichia	Pseudoleptotrichia goodfellowii	Plaque
AB1239_Plaque.79	GCF_022749495.1	9721	GTDB	known	AB1239_Plaque	62.22	1.45	Neural Network (Specific Model)	11	829	4568	2710920889987639	1586283	53	1618	412	18399	None	moderate	MQ	d__Bacteria	p__Pseudomonadota	c__Gammaproteobacteria	o__Burkholderiales	f__Neisseriaceae	g__Neisseria	Neisseria macacae	Plaque
AB1239_Saliva.11	AB1138_Saliva.7	962575	Schmartz_2024	known	AB1239_Saliva	91.5	0.35	Gradient Boost (General Model)	11	841	15572	3.15736e+16	2227889	44	1980	249	60653	None	near	HQ	d__Bacteria	p__Bacillota_A	c__Clostridia	o__Lachnospirales	f__Lachnospiraceae	g__Oribacterium	Oribacterium sinus	Saliva
AB1239_Saliva.13	GCF_013393365.1	9652	GTDB	known	AB1239_Saliva	57.05	3.52	Neural Network (Specific Model)	11	883	3466	2580020862308762	1258844	39	1438	388	25159	None	moderate	MQ	d__Bacteria	p__Bacillota_C	c__Negativicutes	o__Veillonellales	f__Veillonellaceae	g__Veillonella	Veillonella nakazawae	Saliva
AB1239_Saliva.18	AB1239_Saliva.3	999918	Schmartz_2024	known	AB1239_Saliva	60.46	1.07	Neural Network (Specific Model)	11	898	2762	2.49058e+16	1917464	65	2311	712	11064	None	moderate	MQ	d__Bacteria	p__Actinomycetota	c__Actinomycetes	o__Propionibacteriales	f__Propionibacteriaceae	g__Arachnia	Arachnia rubra	Saliva
AB1239_Saliva.26	GCF_024205745.1	9576	GTDB	known	AB1239_Saliva	65.5	1.8	Neural Network (Specific Model)	11	852	4284	2434520856820744	1518598	49	1774	389	43965	None	moderate	MQ	d__Bacteria	p__Pseudomonadota	c__Gammaproteobacteria	o__Burkholderiales	f__Neisseriaceae	g__Neisseria	Neisseria flavescens_B	Saliva
AB1239_Saliva.6	GCF_014931375.1	9576	GTDB	known	AB1239_Saliva	56.37	1.28	Neural Network (Specific Model)	11	895	3046	2.42525e+16	1133851	4	1397	386	10070	None	moderate	MQ	d__Bacteria	p__Pseudomonadota	c__Gammaproteobacteria	o__Enterobacterales	f__Pasteurellaceae	g__Haemophilus_D	Haemophilus_D sp927911595	Saliva
AB1239_Saliva.8	GCF_000238075.1	9652	GTDB	known	AB1239_Saliva	82.59	4.99	Gradient Boost (General Model)	11	896	5541	2.86636e+16	2025136	44	2115	445	21152	None	substantial	MQ	d__Bacteria	p__Bacillota_A	c__Clostridia	o__Lachnospirales	f__Lachnospiraceae	g__Oribacterium	Oribacterium asaccharolyticum	Saliva
AB1241_Plaque.39	GCF_017798005.1	9543	GTDB	known	AB1241_Plaque	87.8	1.45	Neural Network (Specific Model)	11	878	15718	2959101654846336	1708574	43	1692	170	62140	None	substantial	MQ	d__Bacteria	p__Pseudomonadota	c__Gammaproteobacteria	o__Enterobacterales	f__Pasteurellaceae	g__Aggregatibacter	Aggregatibacter sp000466335	Plaque
AB1241_Plaque.52	GCA_915066515.1	9662	GTDB	known	AB1241_Plaque	99.87	0.69	Neural Network (Specific Model)	11	825	19288	2.86201e+16	2627168	51	2528	223	115338	None	near	HQ	d__Bacteria	p__Pseudomonadota	c__Gammaproteobacteria	o__Burkholderiales	f__Neisseriaceae	g__Neisseria	Neisseria sp915066515	Plaque
AB1241_Saliva.16	AB1241_Saliva.23	999622	Schmartz_2024	known	AB1241_Saliva	51.8	0.19	Neural Network (Specific Model)	11	921	3701	272879472693032	941798	57	1062	275	12833	None	moderate	MQ	d__Bacteria	p__Actinomycetota	c__Actinomycetes	o__Actinomycetales	f__Actinomycetaceae	g__Pauljensenia	Pauljensenia sp000758755	Saliva
AB1241_Saliva.19	AB1452_Saliva.15	971233	Schmartz_2024	known	AB1241_Saliva	99.63	0.21	Neural Network (Specific Model)	11	92	598255	3.04124e+16	740165	43	748	3	598255	None	near	HQ	d__Bacteria	p__Patescibacteria	c__Saccharimonadia	o__Saccharimonadales	f__Nanosynbacteraceae	g__Nanosynbacter	Nanosynbacter sp022819365	Saliva
AB1241_Saliva.42	GCA_013333295.2	9606	GTDB	known	AB1241_Saliva	57.77	3.62	Gradient Boost (General Model)	4	877	3706	2509465449804433	657625	36	767	206	11104	None	moderate	MQ	d__Bacteria	p__Patescibacteria	c__JAEDAM01	o__Absconditabacterales	f__Absconditicoccaceae	g__HOT-345	HOT-345 sp013333295	Saliva
AB1241_Saliva.66	MGYG000001392	958025	UHGG	known	AB1241_Saliva	74.62	1.6	Neural Network (Specific Model)	11	92	4474	2.57298e+16	1384256	4	1655	364	19023	None	substantial	MQ	d__Bacteria	p__Campylobacterota	c__Campylobacteria	o__Campylobacterales	f__Campylobacteraceae	g__Campylobacter_A	Campylobacter_A concisus_T	Saliva
AB1241_Saliva.9	AB1241_Saliva.4	999223	Schmartz_2024	known	AB1241_Saliva	69.61	1.09	Neural Network (Specific Model)	11	903	3348	2.51439e+16	1251426	4	1500	395	15919	None	moderate	MQ	d__Bacteria	p__Pseudomonadota	c__Gammaproteobacteria	o__Enterobacterales	f__Pasteurellaceae	g__Haemophilus_D	Haemophilus_D sp014931275	Saliva
AB1243_Plaque.31	AB1005_Plaque.25	983322	Schmartz_2024	known	AB1243_Plaque	94.98	0.37	Neural Network (Specific Model)	11	881	122594	305715406162465	1854902	38	1785	35	259136	None	near	HQ	d__Bacteria	p__Bacillota	c__Bacilli	o__Lactobacillales	f__Streptococcaceae	g__Streptococcus	Streptococcus intermedius	Plaque
AB1243_Plaque.60	GCF_001648475.1	959	GTDB	known	AB1243_Plaque	65.43	4.26	Neural Network (Specific Model)	11	824	4007	2.33176e+16	1624482	57	1916	459	14217	None	moderate	MQ	d__Bacteria	p__Pseudomonadota	c__Gammaproteobacteria	o__Burkholderiales	f__Neisseriaceae	g__Eikenella	Eikenella halliae	Plaque
AB1243_Plaque.67	AB1243_Plaque.40	999999	Schmartz_2024	known	AB1243_Plaque	74.55	0.91	Neural Network (Specific Model)	11	903	7111	2928363047001621	599098	51	617	103	20780	None	substantial	MQ	d__Bacteria	p__Patescibacteria	c__Saccharimonadia	o__Saccharimonadales	f__Nanoperiomorbaceae	g__Nanoperiomorbus		Plaque
AB1243_Saliva.1	GCF_007990445.1	9783	GTDB	known	AB1243_Saliva	62.65	1.27	Neural Network (Specific Model)	11	855	46678	3028122950819672	1294398	3	1220	67	110272	None	moderate	MQ	d__Bacteria	p__Fusobacteriota	c__Fusobacteriia	o__Fusobacteriales	f__Leptotrichiaceae	g__Leptotrichia	Leptotrichia wadei_A	Saliva
AB1243_Saliva.12	GCF_016651435.1	9663	GTDB	known	AB1243_Saliva	85.78	3.38	Gradient Boost (General Model)	11	885	5418	2838067864271457	2404068	39	2505	559	25815	None	substantial	MQ	d__Bacteria	p__Bacillota_A	c__Clostridia	o__Lachnospirales	f__Lachnospiraceae	g__Catonella	Catonella massiliensis	Saliva
AB1243_Saliva.25	GCF_013393365.1	9632	GTDB	known	AB1243_Saliva	52.58	1.51	Neural Network (Specific Model)	11	88	6446	2.83308e+16	1149962	38	1193	227	34242	None	moderate	MQ	d__Bacteria	p__Bacillota_C	c__Negativicutes	o__Veillonellales	f__Veillonellaceae	g__Veillonella	Veillonella nakazawae	Saliva
AB1243_Saliva.39	AB1779_Throat.18	960163	Schmartz_2024	known	AB1243_Saliva	68.69	0.45	Neural Network (Specific Model)	11	878	3693	2.50123e+16	1258774	39	1475	366	24143	None	moderate	MQ	d__Bacteria	p__Pseudomonadota	c__Gammaproteobacteria	o__Enterobacterales	f__Pasteurellaceae	g__Haemophilus_D	Haemophilus_D sp900756155	Saliva
AB1243_Saliva.46	GCF_001956585.1	9695	GTDB	known	AB1243_Saliva	69.55	1.65	Neural Network (Specific Model)	11	877	4708	2857027134876297	2444635	68	2506	599	33953	None	moderate	MQ	d__Bacteria	p__Actinomycetota	c__Actinomycetes	o__Actinomycetales	f__Actinomycetaceae	g__Actinomyces	Actinomyces naeslundii	Saliva
AB1243_Saliva.49	GCF_000429225.1	9665	GTDB	known	AB1243_Saliva	55.45	4.54	Neural Network (Specific Model)	11	877	2962	2.76543e+16	2423638	73	2567	858	14869	None	moderate	MQ	d__Bacteria	p__Actinomycetota	c__Actinomycetes	o__Actinomycetales	f__Actinomycetaceae	g__Actinomyces	Actinomyces dentalis	Saliva
AB1243_Saliva.55	AB1243_Saliva.27	999995	Schmartz_2024	known	AB1243_Saliva	98.91	0.29	Neural Network (Specific Model)	11	911	46362	3502304085733423	1718379	6	1493	70	83675	None	near	HQ	d__Bacteria	p__Actinomycetota	c__Actinomycetes	o__Actinomycetales	f__Actinomycetaceae	g__Mobiluncus	Mobiluncus sp916438445	Saliva
AB1244_Plaque.15	MGYG000001762	987732	UHGG	known	AB1244_Plaque	58.31	1.86	Neural Network (Specific Model)	11	906	3225	2.54977e+16	981996	5	1166	321	14615	None	moderate	MQ	d__Bacteria	p__Bacillota_C	c__Negativicutes	o__Veillonellales	f__Megasphaeraceae	g__Anaeroglobus	Anaeroglobus geminatus	Plaque
AB1244_Plaque.25	AB1357_Saliva.31	990698	Schmartz_2024	known	AB1244_Plaque	98.37	0	Neural Network (Specific Model)	11	886	110583	3595595618439069	2663418	45	2191	44	249205	None	near	HQ	d__Bacteria	p__Bacteroidota	c__Bacteroidia	o__Bacteroidales	f__Bacteroidaceae	g__Prevotella	Prevotella phocaeensis	Plaque
AB1244_Plaque.4	AB1244_Plaque.23	999979	Schmartz_2024	known	AB1244_Plaque	70.87	2.43	Neural Network (Specific Model)	11	881	4675	3.07681e+16	2375174	52	2272	585	15566	None	substantial	MQ	d__Bacteria	p__Bacteroidota	c__Bacteroidia	o__Bacteroidales	f__Bacteroidaceae	g__Prevotella	Prevotella buccae	Plaque
AB1244_Plaque.54	AB1244_Plaque.51	100	Schmartz_2024	known	AB1244_Plaque	98.69	0.08	Neural Network (Specific Model)	11	894	86049	3402407660738714	832936	5	731	16	247675	None	near	HQ	d__Bacteria	p__Patescibacteria	c__Saccharimonadia	o__Saccharimonadales	f__Nanoperiomorbaceae	g__Nanoperiomorbus		Plaque
AB1244_Saliva.17	AB1104_Throat.23	961337	Schmartz_2024	known	AB1244_Saliva	89.79	0.56	Neural Network (Specific Model)	11	894	37335	2827188328912467	713564	43	754	44	72320	None	substantial	MQ	d__Bacteria	p__Patescibacteria	c__Saccharimonadia	o__Saccharimonadales	f__Nanosynbacteraceae	g__Nanosynbacter	Nanosynbacter sp937921475	Saliva
AB1244_Saliva.34	AB1244_Saliva.10	999716	Schmartz_2024	known	AB1244_Saliva	60.97	0.76	Neural Network (Specific Model)	11	881	3409	2391090909090909	1250844	46	1540	398	31496	None	moderate	MQ	d__Bacteria	p__Campylobacterota	c__Campylobacteria	o__Campylobacterales	f__Campylobacteraceae	g__Campylobacter_A	Campylobacter_A showae_A	Saliva
AB1244_Saliva.38	AB1244_Saliva.21	999952	Schmartz_2024	known	AB1244_Saliva	75.59	2.03	Gradient Boost (General Model)	11	932	5399	2.82741e+16	1201104	4	1323	273	17145	None	substantial	MQ	d__Bacteria	p__Bacillota_A	c__Clostridia	o__Peptostreptococcales	f__Anaerovoracaceae	g__JABZIP01	JABZIP01 sp015258265	Saliva
AB1244_Saliva.45	GCF_937936315.1	9903	GTDB	known	AB1244_Saliva	50.37	0.35	Neural Network (Specific Model)	11	911	3559	2.64858e+16	1205192	4	1384	377	18478	None	moderate	MQ	d__Bacteria	p__Bacteroidota	c__Bacteroidia	o__Flavobacteriales	f__Flavobacteriaceae	g__Capnocytophaga	Capnocytophaga sp937936315	Saliva
AB1244_Saliva.9	AB1110_Throat.1	976107	Schmartz_2024	known	AB1244_Saliva	96.44	4.47	Neural Network (Specific Model)	11	863	8355	2761165245635404	2360236	3	2463	399	42158	None	near	HQ	d__Bacteria	p__Bacillota	c__Bacilli	o__Staphylococcales	f__Gemellaceae	g__Gemella	Gemella sanguinis	Saliva
AB1253_Plaque.1	AB1253_Plaque.11	99986	Schmartz_2024	known	AB1253_Plaque	51.89	0.14	Neural Network (Specific Model)	11	922	2558	2.74363e+16	1125446	51	1263	454	7364	None	moderate	MQ	d__Bacteria	p__Spirochaetota	c__Spirochaetia	o__Treponematales	f__Treponemataceae	g__Treponema_D	Treponema_D socranskii	Plaque
AB1253_Plaque.16	GCF_937949835.1	952	GTDB	known	AB1253_Plaque	55.68	2.94	Neural Network (Specific Model)	11	848	2876	2.34773e+16	1199141	47	1448	432	10107	None	moderate	MQ	d__Bacteria	p__Campylobacterota	c__Campylobacteria	o__Campylobacterales	f__Campylobacteraceae	g__Campylobacter_B	Campylobacter_B sp937949835	Plaque
AB1253_Plaque.2	GCF_002998435.1	9986	GTDB	known	AB1253_Plaque	93.4	0.55	Neural Network (Specific Model)	11	897	32874	355959855479727	2960678	48	2491	148	128136	None	near	HQ	d__Bacteria	p__Bacteroidota	c__Bacteroidia	o__Bacteroidales	f__Bacteroidaceae	g__Bacteroides	Bacteroides zoogleoformans	Plaque
AB1253_Plaque.42	CM_periimplantitis__SP_283SPI_T016__bin_14	975247	Pasolli_2019	known	AB1253_Plaque	79.18	2.26	Neural Network (Specific Model)	11	864	8431	286501300390117	1526135	67	1538	235	34817	None	substantial	MQ	d__Bacteria	p__Actinomycetota	c__Actinomycetes	o__Actinomycetales	f__Actinomycetaceae	g__Pauljensenia	Pauljensenia sp000185285	Plaque
AB1253_Plaque.79	AB1253_Plaque.14	999883	Schmartz_2024	known	AB1253_Plaque	74.07	1.92	Neural Network (Specific Model)	11	841	4595	3.01184e+16	2436662	48	2271	605	15972	None	substantial	MQ	d__Bacteria	p__Bacteroidota	c__Bacteroidia	o__Bacteroidales	f__Bacteroidaceae	g__Prevotella	Prevotella conceptionensis	Plaque
AB1253_Plaque.91	HMP_2012__SRS024289__bin_52	989832	Pasolli_2019	known	AB1253_Plaque	56.96	1.39	Neural Network (Specific Model)	11	904	3260	2465343347639485	1142372	43	1398	368	15821	None	moderate	MQ	d__Bacteria	p__Pseudomonadota	c__Gammaproteobacteria	o__Enterobacterales	f__Pasteurellaceae	g__Aggregatibacter		Plaque
AB1253_Plaque.93	AB1323_Saliva.7	966426	Schmartz_2024	known	AB1253_Plaque	51.04	1.5	Gradient Boost (General Model)	11	876	3431	2.40705e+16	1175203	38	1428	357	18895	None	moderate	MQ	d__Bacteria	p__Bacillota	c__Bacilli	o__Lactobacillales	f__Aerococcaceae	g__Granulicatella	Granulicatella adiacens	Plaque
AB1253_Saliva.18	AB1253_Saliva.29	999957	Schmartz_2024	known	AB1253_Saliva	62.1	1.63	Neural Network (Specific Model)	11	915	4262	2.63715e+16	1613855	41	1869	426	44389	None	moderate	MQ	d__Bacteria	p__Bacteroidota	c__Bacteroidia	o__Flavobacteriales	f__Flavobacteriaceae	g__Capnocytophaga	Capnocytophaga leadbetteri_A	Saliva
AB1253_Saliva.21	GCA_900555265.1	9858	GTDB	known	AB1253_Saliva	98.93	0.16	Neural Network (Specific Model)	11	919	710198	2982175102599179	710198	43	731	1	710198	None	near	HQ	d__Bacteria	p__Patescibacteria	c__Saccharimonadia	o__Saccharimonadales	f__Nanosynbacteraceae	g__Nanosynbacter	Nanosynbacter sp900555265	Saliva
AB1253_Saliva.32	AB1043_Saliva.37	96582	Schmartz_2024	known	AB1253_Saliva	52.94	0	Neural Network (Specific Model)	11	84	9272	2.6407e+16	1016597	39	1080	154	39944	None	moderate	MQ	d__Bacteria	p__Bacillota	c__Bacilli	o__Lactobacillales	f__Aerococcaceae	g__Granulicatella	Granulicatella sp916438765	Saliva
AB1253_Saliva.37	AB1253_Saliva.35	999931	Schmartz_2024	known	AB1253_Saliva	76.27	1.04	Neural Network (Specific Model)	11	922	3821	2.47071e+16	1372966	41	1713	408	17087	None	substantial	MQ	d__Bacteria	p__Campylobacterota	c__Campylobacteria	o__Campylobacterales	f__Campylobacteraceae	g__Campylobacter_A	Campylobacter_A concisus_T	Saliva
AB1253_Saliva.40	AB1253_Saliva.33	999954	Schmartz_2024	known	AB1253_Saliva	65.31	1.88	Neural Network (Specific Model)	11	901	3239	2.55726e+16	1569879	59	1848	529	13117	None	moderate	MQ	d__Bacteria	p__Bacillota_C	c__Negativicutes	o__Selenomonadales	f__Selenomonadaceae	g__Selenomonas	Selenomonas sp905373085	Saliva
AB1253_Saliva.43	GCF_902373545.1	9787	GTDB	known	AB1253_Saliva	100	0.6	Neural Network (Specific Model)	11	874	64821	3.51828e+16	2477611	66	2055	64	130005	None	perfect	HQ	d__Bacteria	p__Actinomycetota	c__Actinomycetes	o__Actinomycetales	f__Actinomycetaceae	g__Pauljensenia	Pauljensenia sp902373545	Saliva
AB1253_Saliva.44	GCA_902363395.1	9528	GTDB	known	AB1253_Saliva	52.03	3.08	Neural Network (Specific Model)	11	894	31898	2.95438e+16	1044418	43	1055	50	128335	None	moderate	MQ	d__Bacteria	p__Bacillota	c__Bacilli	o__Lactobacillales	f__Streptococcaceae	g__Streptococcus	Streptococcus sp902363395	Saliva
AB1253_Saliva.57	AB1633_Throat.16	969215	Schmartz_2024	known	AB1253_Saliva	85.26	0.81	Gradient Boost (General Model)	11	894	7856	3.0416e+16	1984852	44	1947	328	31983	None	substantial	MQ	d__Bacteria	p__Bacillota_A	c__Clostridia	o__Lachnospirales	f__Lachnospiraceae	g__Oribacterium	Oribacterium asaccharolyticum	Saliva
AB1253_Saliva.61	GCF_015265235.1	9658	GTDB	known	AB1253_Saliva	62.01	3.65	Neural Network (Specific Model)	11	913	3626	2681235194585448	1557570	58	1773	467	20648	None	moderate	MQ	d__Bacteria	p__Bacillota_C	c__Negativicutes	o__Selenomonadales	f__Selenomonadaceae	g__Centipeda	Centipeda sp015265235	Saliva
AB1253_Saliva.63	AB1253_Saliva.20	99999	Schmartz_2024	known	AB1253_Saliva	70.32	2.07	Gradient Boost (General Model)	11	878	3737	2741795302013423	2230606	66	2384	668	11643	None	substantial	MQ	d__Bacteria	p__Pseudomonadota	c__Gammaproteobacteria	o__Burkholderiales	f__Burkholderiaceae	g__Lautropia	Lautropia mirabilis	Saliva
AB1253_Saliva.7	GCA_015256455.1	9692	GTDB	known	AB1253_Saliva	95.41	0.46	Gradient Boost (General Model)	11	92	42328	3079557277255119	1811919	37	1807	100	205090	None	near	HQ	d__Bacteria	p__Bacillota_I	c__Bacilli_A	o__Erysipelotrichales	f__Erysipelotrichaceae	g__Bulleidia	Bulleidia sp015256455	Saliva
AB1254_Plaque.23	AB1053_Plaque.11	965798	Schmartz_2024	known	AB1254_Plaque	77.97	1.25	Neural Network (Specific Model)	11	891	6350	2919384615384615	1211820	5	1235	220	17345	None	substantial	MQ	d__Bacteria	p__Actinomycetota	c__Coriobacteriia	o__Coriobacteriales	f__Atopobiaceae	g__Lancefieldella	Lancefieldella sp024691995	Plaque
AB1254_Plaque.3	AB1254_Plaque.3	999969	Schmartz_2024	known	AB1254_Plaque	66.2	0.2	Gradient Boost (General Model)	11	887	2952	2.57255e+16	1430255	65	1648	505	8353	None	moderate	MQ	d__Bacteria	p__Synergistota	c__Synergistia	o__Synergistales	f__Aminobacteriaceae	g__CAJPSE01	CAJPSE01 sp938040765	Plaque
AB1254_Plaque.38	GCF_003130255.1	9707	GTDB	known	AB1254_Plaque	100	0.11	Neural Network (Specific Model)	11	897	231496	3.27189e+16	2306551	43	2110	18	655097	None	perfect	HQ	d__Bacteria	p__Pseudomonadota	c__Gammaproteobacteria	o__Enterobacterales	f__Pasteurellaceae	g__Aggregatibacter	Aggregatibacter kilianii	Plaque
AB1254_Plaque.40	AB1254_Plaque.41	999969	Schmartz_2024	known	AB1254_Plaque	96.4	0.01	Neural Network (Specific Model)	11	931	35231	2945890642615558	1678579	38	1774	73	109643	None	near	HQ	d__Bacteria	p__Campylobacterota	c__Campylobacteria	o__Campylobacterales	f__Campylobacteraceae	g__Campylobacter_A	Campylobacter_A concisus	Plaque
AB1254_Plaque.6	AB1471_Plaque.15	968606	Schmartz_2024	known	AB1254_Plaque	55.8	1.16	Neural Network (Specific Model)	11	892	3381	2425308924485126	355753	36	437	112	8978	None	moderate	MQ	d__Bacteria	p__Patescibacteria	c__Saccharimonadia	o__Saccharimonadales	f__Nanogingivalaceae	g__Nanogingivalis	Nanogingivalis sp900555945	Plaque
AB1254_Plaque.7	AB1489_Plaque.57	969956	Schmartz_2024	known	AB1254_Plaque	92.21	0.09	Neural Network (Specific Model)	11	854	22129	3503642458100559	2199778	56	1790	141	73888	None	near	HQ	d__Bacteria	p__Bacteroidota	c__Bacteroidia	o__Bacteroidales	f__Porphyromonadaceae	g__Porphyromonas	Porphyromonas sp905372525	Plaque
AB1254_Plaque.71	HMP_2012__SRS024289__bin_52	970312	Pasolli_2019	known	AB1254_Plaque	69.72	0.13	Neural Network (Specific Model)	11	9	14749	2.83905e+16	1410986	43	1493	157	53936	None	moderate	MQ	d__Bacteria	p__Pseudomonadota	c__Gammaproteobacteria	o__Enterobacterales	f__Pasteurellaceae	g__Aggregatibacter		Plaque
AB1254_Saliva.31	HMP_2012__SRS020226__bin_53	9806	Pasolli_2019	known	AB1254_Saliva	53.4	0.14	Neural Network (Specific Model)	11	905	5775	2821662269129288	353802	48	379	70	39271	None	moderate	MQ	d__Bacteria	p__Patescibacteria	c__Saccharimonadia	o__Saccharimonadales	f__Saccharimonadaceae	g__Saccharimonas	Saccharimonas sp018127705	Saliva
AB1254_Saliva.50	GCF_003130255.1	9712	GTDB	known	AB1254_Saliva	54.43	0.7	Neural Network (Specific Model)	11	895	3039	2.46318e+16	1198905	43	1455	410	9936	None	moderate	MQ	d__Bacteria	p__Pseudomonadota	c__Gammaproteobacteria	o__Enterobacterales	f__Pasteurellaceae	g__Aggregatibacter	Aggregatibacter kilianii	Saliva
AB1254_Saliva.54	GCA_015257795.3	958	GTDB	known	AB1254_Saliva	64.45	1.46	Neural Network (Specific Model)	11	898	3834	2.49349e+16	488298	37	587	142	11910	None	moderate	MQ	d__Bacteria	p__Patescibacteria	c__Saccharimonadia	o__Saccharimonadales	f__Nanogingivalaceae	g__Nanogingivalis	Nanogingivalis sp015257795	Saliva
AB1254_Saliva.60	GCA_001058355.1	9645	GTDB	known	AB1254_Saliva	58.22	0.69	Gradient Boost (General Model)	11	877	4022	2575782383419689	849157	39	965	236	16784	None	moderate	MQ	d__Bacteria	p__Bacillota	c__Bacilli	o__Lactobacillales	f__Aerococcaceae	g__Granulicatella	Granulicatella sp001058355	Saliva
AB1254_Saliva.71	AB1254_Saliva.24	999964	Schmartz_2024	known	AB1254_Saliva	52.77	1.33	Gradient Boost (General Model)	11	917	3407	2764050258684405	1220830	5	1353	377	13608	None	moderate	MQ	d__Bacteria	p__Bacillota_A	c__Clostridia	o__Lachnospirales	f__Lachnospiraceae	g__Butyrivibrio	Butyrivibrio sp015258065	Saliva
AB1255_Saliva.15	MGYG000004687	966363	UHGG	known	AB1255_Saliva	92.53	0.46	Neural Network (Specific Model)	11	884	14776	2.83778e+16	1869173	4	1944	200	47702	None	near	HQ	d__Bacteria	p__Pseudomonadota	c__Gammaproteobacteria	o__Enterobacterales	f__Pasteurellaceae	g__Haemophilus_A	Haemophilus_A parahaemolyticus	Saliva
AB1255_Saliva.2	GCF_900475315.1	9714	GTDB	known	AB1255_Saliva	88.34	0.02	Neural Network (Specific Model)	11	874	76901	2.95288e+16	1756113	51	1734	35	153422	None	substantial	MQ	d__Bacteria	p__Pseudomonadota	c__Gammaproteobacteria	o__Burkholderiales	f__Neisseriaceae	g__Neisseria	Neisseria cinerea	Saliva
AB1259_Plaque.16	AB1259_Plaque.19	999771	Schmartz_2024	known	AB1259_Plaque	53.79	2.31	Neural Network (Specific Model)	11	802	3423	2357240356083086	1185564	48	1348	382	15434	None	moderate	MQ	d__Bacteria	p__Campylobacterota	c__Campylobacteria	o__Campylobacterales	f__Campylobacteraceae	g__Campylobacter_B	Campylobacter_B sp937949835	Plaque
AB1259_Plaque.24	AB883_Saliva.11	963204	Schmartz_2024	known	AB1259_Plaque	97.18	1.84	Neural Network (Specific Model)	11	865	51907	3356957928802589	3233024	68	2781	133	285975	None	near	HQ	d__Bacteria	p__Actinomycetota	c__Actinomycetes	o__Actinomycetales	f__Actinomycetaceae	g__Actinomyces	Actinomyces massiliensis	Plaque
AB1259_Plaque.27	AB1005_Plaque.18	999485	Schmartz_2024	known	AB1259_Plaque	91.87	0.45	Neural Network (Specific Model)	11	905	847770	3.07831e+16	847770	48	832	1	847770	None	near	HQ	d__Bacteria	p__Patescibacteria	c__Saccharimonadia	o__Saccharimonadales	f__Saccharimonadaceae	g__Saccharimonas		Plaque
AB1259_Plaque.34	HMP_2012__SRS023595__bin_63	974627	Pasolli_2019	known	AB1259_Plaque	72.76	4.62	Neural Network (Specific Model)	11	897	3684	2.48364e+16	1634052	39	1969	499	15296	None	substantial	MQ	d__Bacteria	p__Pseudomonadota	c__Gammaproteobacteria	o__Enterobacterales	f__Pasteurellaceae	g__Haemophilus_D	Haemophilus_D parainfluenzae	Plaque
AB1259_Plaque.54	GCF_000194945.1	9715	GTDB	known	AB1259_Plaque	59.98	0.36	Neural Network (Specific Model)	11	903	143659	3.13844e+16	1357045	43	1304	18	325427	None	moderate	MQ	d__Bacteria	p__Bacillota	c__Bacilli	o__Lactobacillales	f__Streptococcaceae	g__Streptococcus	Streptococcus sanguinis	Plaque
AB1259_Saliva.37	AB1301_Throat.16	971073	Schmartz_2024	known	AB1259_Saliva	50.82	0.37	Neural Network (Specific Model)	11	882	4384	2.52093e+16	1079584	32	1261	298	18701	None	moderate	MQ	d__Bacteria	p__Fusobacteriota	c__Fusobacteriia	o__Fusobacteriales	f__Leptotrichiaceae	g__Leptotrichia_A	Leptotrichia_A sp000469505	Saliva
AB1259_Saliva.44	AB1169_Plaque.6	973043	Schmartz_2024	known	AB1259_Saliva	55.91	0.77	Neural Network (Specific Model)	11	875	2749	2.62433e+16	1771575	69	1972	666	9256	None	moderate	MQ	d__Bacteria	p__Actinomycetota	c__Actinomycetes	o__Actinomycetales	f__Actinomycetaceae	g__Actinomyces	Actinomyces sp915069725	Saliva
AB1260_Plaque.18	GCF_900476045.1	9771	GTDB	known	AB1260_Plaque	52.99	1.76	Neural Network (Specific Model)	11	844	4729	2602242194891202	976319	32	1057	241	17213	None	moderate	MQ	d__Bacteria	p__Bacillota	c__Bacilli	o__Staphylococcales	f__Gemellaceae	g__Gemella	Gemella morbillorum	Plaque
AB1260_Plaque.4	HMP_2012__SRS016200__bin_12	951967	Pasolli_2019	known	AB1260_Plaque	74.34	0.87	Neural Network (Specific Model)	11	924	5166	2652379730596536	1341449	37	1559	297	29938	None	substantial	MQ	d__Bacteria	p__Bacteroidota	c__Bacteroidia	o__Flavobacteriales	f__Weeksellaceae	g__JABCPE02		Plaque
AB1262_Plaque.17	AB1116_Saliva.3	999687	Schmartz_2024	known	AB1262_Plaque	100	0.12	Neural Network (Specific Model)	11	892	81731	3312426488757104	4503834	67	4047	83	316251	None	perfect	HQ	d__Bacteria	p__Pseudomonadota	c__Gammaproteobacteria	o__Xanthomonadales	f__Xanthomonadaceae	g__Stenotrophomonas	Stenotrophomonas pavanii	Plaque
AB1262_Saliva.10	AB1262_Throat.29	974672	Schmartz_2024	known	AB1262_Saliva	52.46	0.92	Neural Network (Specific Model)	11	851	4274	2.51896e+16	1146857	39	1293	317	16056	None	moderate	MQ	d__Bacteria	p__Pseudomonadota	c__Gammaproteobacteria	o__Enterobacterales	f__Pasteurellaceae	g__Haemophilus_D	Haemophilus_D parainfluenzae_S	Saliva
AB1262_Saliva.3	AB1301_Throat.16	975101	Schmartz_2024	known	AB1262_Saliva	70.62	1.64	Neural Network (Specific Model)	11	886	3962	2612236756049706	1350994	32	1529	389	23860	None	substantial	MQ	d__Bacteria	p__Fusobacteriota	c__Fusobacteriia	o__Fusobacteriales	f__Leptotrichiaceae	g__Leptotrichia_A	Leptotrichia_A sp000469505	Saliva
AB1264_Plaque.26	AB1264_Plaque.48	999954	Schmartz_2024	known	AB1264_Plaque	51.24	0.07	Neural Network (Specific Model)	11	884	3062	2713576415826222	1185222	4	1289	408	9489	None	moderate	MQ	d__Bacteria	p__Bacteroidota	c__Bacteroidia	o__Flavobacteriales	f__Flavobacteriaceae	g__Capnocytophaga	Capnocytophaga ochracea	Plaque
AB1264_Plaque.34	GCF_000312445.1	9954	GTDB	known	AB1264_Plaque	51.41	2.29	Neural Network (Specific Model)	11	901	3744	2723186311787072	1189567	48	1315	346	14712	None	moderate	MQ	d__Bacteria	p__Bacteroidota	c__Bacteroidia	o__Bacteroidales	f__Bacteroidaceae	g__Phocaeicola	Phocaeicola abscessus	Plaque
AB1264_Plaque.37	AB1264_Plaque.47	999993	Schmartz_2024	known	AB1264_Plaque	60.87	0.06	Neural Network (Specific Model)	11	869	3778	2434076858813701	1002121	37	1197	294	20805	None	moderate	MQ	d__Bacteria	p__Campylobacterota	c__Campylobacteria	o__Campylobacterales	f__Campylobacteraceae	g__Campylobacter_B		Plaque
AB1264_Plaque.39	AB1264_Plaque.12	99983	Schmartz_2024	known	AB1264_Plaque	68.72	0.75	Gradient Boost (General Model)	11	887	5556	2.93452e+16	1163147	44	1174	253	27552	None	moderate	MQ	d__Bacteria	p__Bacteroidota	c__Bacteroidia	o__Bacteroidales	f__Paludibacteraceae	g__F0058	F0058 sp905372135	Plaque
AB1264_Plaque.44	HMP_2012__SRS013252__bin_19	980725	Pasolli_2019	known	AB1264_Plaque	87.56	0.36	Neural Network (Specific Model)	11	826	13449	2.97694e+16	1936042	54	1792	221	60714	None	substantial	MQ	d__Bacteria	p__Actinomycetota	c__Actinomycetes	o__Actinomycetales	f__Micrococcaceae	g__Rothia	Rothia dentocariosa	Plaque
AB1264_Plaque.54	GCF_000163895.2	9815	GTDB	known	AB1264_Plaque	68.96	0.25	Neural Network (Specific Model)	11	832	73660	3.05769e+16	1350368	34	1226	41	192090	None	moderate	MQ	d__Bacteria	p__Bacillota_A	c__Clostridia	o__Peptostreptococcales	f__Filifactoraceae	g__Filifactor	Filifactor alocis	Plaque
AB1264_Plaque.59	GCF_004803795.1	9735	GTDB	known	AB1264_Plaque	73.68	2.11	Neural Network (Specific Model)	11	82	4320	2.44586e+16	1729720	46	1939	486	18695	None	substantial	MQ	d__Bacteria	p__Campylobacterota	c__Campylobacteria	o__Campylobacterales	f__Campylobacteraceae	g__Campylobacter_A	Campylobacter_A rectus	Plaque
AB1264_Plaque.60	AB1264_Plaque.6	999995	Schmartz_2024	known	AB1264_Plaque	53.99	1.85	Neural Network (Specific Model)	11	862	3232	2.60083e+16	1448537	63	1604	477	11448	None	moderate	MQ	d__Bacteria	p__Actinomycetota	c__Coriobacteriia	o__Coriobacteriales	f__Eggerthellaceae	g__		Plaque
AB1264_Plaque.65	AB1052_Plaque.42	983011	Schmartz_2024	known	AB1264_Plaque	53.16	0.4	Gradient Boost (General Model)	11	886	4331	2719305724725944	754623	39	821	197	28103	None	moderate	MQ	d__Bacteria	p__Bacillota_A	c__Clostridia	o__Peptostreptococcales	f__Peptostreptococcaceae	g__Peptostreptococcus	Peptostreptococcus stomatis	Plaque
AB1264_Plaque.79	GCF_000429225.1	9787	GTDB	known	AB1264_Plaque	59.25	2.53	Neural Network (Specific Model)	11	869	3948	2948086785009862	2574879	73	2535	748	36253	None	moderate	MQ	d__Bacteria	p__Actinomycetota	c__Actinomycetes	o__Actinomycetales	f__Actinomycetaceae	g__Actinomyces	Actinomyces dentalis	Plaque
AB1264_Saliva.2	AB1170_Saliva.10	968753	Schmartz_2024	known	AB1264_Saliva	85.65	0.35	Neural Network (Specific Model)	11	899	31569	2914309559939302	639028	43	659	39	55945	None	substantial	MQ	d__Bacteria	p__Patescibacteria	c__Saccharimonadia	o__Saccharimonadales	f__Nanosynbacteraceae	g__Nanosynbacter		Saliva
AB1264_Saliva.46	AB1264_Saliva.20	999848	Schmartz_2024	known	AB1264_Saliva	59.56	0.3	Neural Network (Specific Model)	11	871	3809	2766344510190664	1446345	6	1521	423	14321	None	moderate	MQ	d__Bacteria	p__Actinomycetota	c__Actinomycetes	o__Actinomycetales	f__Bifidobacteriaceae	g__Bifidobacterium	Bifidobacterium longum	Saliva
AB1265_Plaque.10	GCA_013333675.2	9663	GTDB	known	AB1265_Plaque	61.19	1.29	Neural Network (Specific Model)	11	903	4887	2.74946e+16	418574	51	459	103	18061	None	moderate	MQ	d__Bacteria	p__Patescibacteria	c__Saccharimonadia	o__Saccharimonadales	f__Saccharimonadaceae	g__Saccharimonas	Saccharimonas sp013333675	Plaque
AB1265_Plaque.14	GCF_022288825.1	9937	GTDB	known	AB1265_Plaque	99.25	1.02	Neural Network (Specific Model)	11	848	61007	2941145584725537	2178185	59	2095	67	181571	None	near	HQ	d__Bacteria	p__Pseudomonadota	c__Gammaproteobacteria	o__Burkholderiales	f__Neisseriaceae	g__CAJPNX01	CAJPNX01 sp905372165	Plaque
AB1265_Plaque.21	A0022_Saliva.11	966829	Schmartz_2024	known	AB1265_Plaque	99.92	0.45	Neural Network (Specific Model)	11	898	37436	3023602620087336	2771896	4	2748	123	206135	None	near	HQ	d__Bacteria	p__Bacteroidota	c__Bacteroidia	o__Flavobacteriales	f__Flavobacteriaceae	g__Capnocytophaga	Capnocytophaga sp938029845	Plaque
AB1265_Plaque.29	AB1265_Plaque.10	999965	Schmartz_2024	known	AB1265_Plaque	52.16	0.32	Gradient Boost (General Model)	11	828	2858	2.2224e+16	1170960	55	1457	423	9413	None	moderate	MQ	d__Bacteria	p__Pseudomonadota	c__Gammaproteobacteria	o__Burkholderiales	f__Neisseriaceae	g__Kingella_B	Kingella_B oralis	Plaque
AB1265_Plaque.3	GCF_900637905.1	9758	GTDB	known	AB1265_Plaque	95.51	0.84	Neural Network (Specific Model)	11	892	240660	3207214741318214	1519791	28	1411	19	714936	None	near	HQ	d__Bacteria	p__Bacillota_A	c__Clostridia	o__Tissierellales	f__Peptoniphilaceae	g__Parvimonas	Parvimonas micra	Plaque
AB1265_Plaque.4	AB1169_Plaque.6	976334	Schmartz_2024	known	AB1265_Plaque	52.41	0.43	Neural Network (Specific Model)	11	875	3710	2859300458715596	1706082	7	1744	509	18825	None	moderate	MQ	d__Bacteria	p__Actinomycetota	c__Actinomycetes	o__Actinomycetales	f__Actinomycetaceae	g__Actinomyces	Actinomyces oris	Plaque
AB1265_Plaque.46	AB1265_Plaque.31	999917	Schmartz_2024	known	AB1265_Plaque	51.44	2.67	Neural Network (Specific Model)	11	917	2902	2.45997e+16	1251149	4	1558	441	14167	None	moderate	MQ	d__Bacteria	p__Bacteroidota	c__Bacteroidia	o__Flavobacteriales	f__Flavobacteriaceae	g__Capnocytophaga	Capnocytophaga leadbetteri_A	Plaque
AB1265_Plaque.5	AB1265_Plaque.16	999853	Schmartz_2024	known	AB1265_Plaque	63.85	2.42	Neural Network (Specific Model)	11	926	5702	2513536	507688	48	625	107	42599	None	moderate	MQ	d__Bacteria	p__Patescibacteria	c__Saccharimonadia	o__Saccharimonadales	f__Nanosynbacteraceae	g__Nanosynbacter		Plaque
AB1265_Saliva.15	AB1174_Throat.11	967548	Schmartz_2024	known	AB1265_Saliva	73.23	0.02	Gradient Boost (General Model)	11	867	4165	2561020942408377	1014094	39	1146	274	25196	None	substantial	MQ	d__Bacteria	p__Bacillota	c__Bacilli	o__Lactobacillales	f__Aerococcaceae	g__Granulicatella	Granulicatella sp001058355	Saliva
AB1265_Saliva.37	AB1265_Saliva.22	999566	Schmartz_2024	known	AB1265_Saliva	52.12	0.6	Gradient Boost (General Model)	11	915	2829	2.37666e+16	1276144	38	1642	459	14386	None	moderate	MQ	d__Bacteria	p__Bacillota_A	c__Clostridia	o__Lachnospirales	f__Lachnospiraceae	g__Lachnoanaerobaculum	Lachnoanaerobaculum orale	Saliva
AB1265_Saliva.40	HMP_2012__SRS015799__bin_2	977218	Pasolli_2019	known	AB1265_Saliva	66.6	0.19	Neural Network (Specific Model)	11	823	4767	2.45581e+16	1636776	51	1830	410	41758	None	moderate	MQ	d__Bacteria	p__Pseudomonadota	c__Gammaproteobacteria	o__Burkholderiales	f__Neisseriaceae	g__Neisseria	Neisseria flava	Saliva
AB1265_Saliva.42	AB1131_Throat.5	974786	Schmartz_2024	known	AB1265_Saliva	84.43	0.51	Neural Network (Specific Model)	11	879	17010	2.98508e+16	1685642	39	1656	181	78610	None	substantial	MQ	d__Bacteria	p__Bacillota_C	c__Negativicutes	o__Veillonellales	f__Veillonellaceae	g__Veillonella	Veillonella atypica	Saliva
AB1265_Saliva.44	AB1265_Saliva.16	998385	Schmartz_2024	known	AB1265_Saliva	79.22	3.41	Gradient Boost (General Model)	11	918	4193	2.66204e+16	1529293	37	1762	412	15613	None	substantial	MQ	d__Bacteria	p__Bacillota_I	c__Bacilli_A	o__Erysipelotrichales	f__Erysipelotrichaceae	g__Bulleidia	Bulleidia sp015256455	Saliva
AB1265_Saliva.45	AB1265_Saliva.1	999378	Schmartz_2024	known	AB1265_Saliva	52.84	3.02	Neural Network (Specific Model)	11	912	3212	2551416719846841	1312034	4	1567	429	11867	None	moderate	MQ	d__Bacteria	p__Bacteroidota	c__Bacteroidia	o__Flavobacteriales	f__Flavobacteriaceae	g__Capnocytophaga	Capnocytophaga leadbetteri_A	Saliva
AB1266_Plaque.10	GCF_002096355.1	9574	GTDB	known	AB1266_Plaque	96.07	0.15	Neural Network (Specific Model)	11	898	54631	3.03218e+16	1960738	41	1939	57	126331	None	near	HQ	d__Bacteria	p__Bacillota	c__Bacilli	o__Lactobacillales	f__Streptococcaceae	g__Streptococcus	Streptococcus oralis_T	Plaque
AB1266_Plaque.24	AB1266_Plaque.47	999937	Schmartz_2024	known	AB1266_Plaque	53.57	0.81	Neural Network (Specific Model)	11	892	3324	2675498371335505	1378209	59	1535	442	11429	None	moderate	MQ	d__Bacteria	p__Actinomycetota	c__Actinomycetes	o__Actinomycetales	f__Bifidobacteriaceae	g__Bifidobacterium	Bifidobacterium dentium	Plaque
AB1266_Plaque.31	AB1269_Plaque.30	967779	Schmartz_2024	known	AB1266_Plaque	98.88	0.57	Neural Network (Specific Model)	11	917	89396	2.94286e+16	901570	47	939	22	152471	None	near	HQ	d__Bacteria	p__Patescibacteria	c__Saccharimonadia	o__Saccharimonadales	f__Nanosynbacteraceae	g__Nanosynbacter		Plaque
AB1266_Plaque.40	MGYG000004158	989406	UHGG	known	AB1266_Plaque	98.1	0.18	Neural Network (Specific Model)	11	88	37505	3047646687697161	1643302	45	1585	76	310491	None	near	HQ	d__Bacteria	p__Bacillota_C	c__Negativicutes	o__Veillonellales	f__Dialisteraceae	g__Dialister	Dialister invisus	Plaque
AB1266_Plaque.53	AB1266_Plaque.24	999951	Schmartz_2024	known	AB1266_Plaque	50.16	1.16	Gradient Boost (General Model)	11	893	2768	2652591414944356	1117461	57	1258	421	8222	None	moderate	MQ	d__Bacteria	p__Bacillota_A	c__Clostridia	o__Lachnospirales	f__Lachnospiraceae	g__Oribacterium	Oribacterium sp000160135	Plaque
AB1268_Plaque.13	AB1268_Plaque.50	100	Schmartz_2024	known	AB1268_Plaque	98.05	0.42	Neural Network (Specific Model)	11	897	58944	3.36461e+16	822998	51	733	18	114789	None	near	HQ	d__Bacteria	p__Patescibacteria	c__Saccharimonadia	o__Saccharimonadales	f__Nanoperiomorbaceae	g__Nanoperiomorbus		Plaque
AB1268_Plaque.23	CM_periimplantitis__SP_143SPI_T016__bin_16	965739	Pasolli_2019	known	AB1268_Plaque	56.31	2.54	Neural Network (Specific Model)	11	873	5255	2892280619427499	2114760	69	2131	498	28513	None	moderate	MQ	d__Bacteria	p__Actinomycetota	c__Actinomycetes	o__Actinomycetales	f__Actinomycetaceae	g__Actinomyces	Actinomyces oris_C	Plaque
AB1268_Plaque.26	GCA_905373085.1	984	GTDB	known	AB1268_Plaque	99.94	0.17	Neural Network (Specific Model)	11	899	122805	3.32999e+16	2370462	58	2136	53	336135	None	near	HQ	d__Bacteria	p__Bacillota_C	c__Negativicutes	o__Selenomonadales	f__Selenomonadaceae	g__Selenomonas	Selenomonas sp905373085	Plaque
AB1268_Plaque.27	SPMP27_bin.48	989346	SPMP	known	AB1268_Plaque	99.96	4.59	Gradient Boost (General Model)	11	838	55161	3.1983e+16	4317105	6	3775	124	280485	None	near	HQ	d__Bacteria	p__Desulfobacterota	c__Desulfovibrionia	o__Desulfovibrionales	f__Desulfovibrionaceae	g__Bilophila	Bilophila wadsworthia	Plaque
AB1268_Plaque.54	AB1268_Plaque.40	999733	Schmartz_2024	known	AB1268_Plaque	76.16	1.89	Neural Network (Specific Model)	11	868	4839	2975137676292814	1528518	56	1489	377	20724	None	substantial	MQ	d__Bacteria	p__Bacteroidota	c__Bacteroidia	o__Bacteroidales	f__Porphyromonadaceae	g__Porphyromonas	Porphyromonas sp000467855	Plaque
AB1268_Plaque.57	AB1742_Plaque.2	998192	Schmartz_2024	known	AB1268_Plaque	67.25	0.95	Neural Network (Specific Model)	11	898	5842	2.92474e+16	1019975	47	1046	212	20703	None	moderate	MQ	d__Bacteria	p__Bacillota_A	c__Clostridia	o__Peptostreptococcales	f__Anaerovoracaceae	g__Mogibacterium	Mogibacterium timidum	Plaque
AB1268_Plaque.58	AB1498_Plaque.19	982155	Schmartz_2024	known	AB1268_Plaque	58.08	0.21	Neural Network (Specific Model)	11	874	3491	2.82355e+16	1488879	45	1539	463	18467	None	moderate	MQ	d__Bacteria	p__Bacteroidota	c__Bacteroidia	o__Bacteroidales	f__Bacteroidaceae	g__Prevotella	Prevotella oris	Plaque
AB1268_Plaque.6	GCF_000143845.1	9916	GTDB	known	AB1268_Plaque	58.15	4.38	Neural Network (Specific Model)	11	877	3395	2600499671268902	1350846	65	1521	423	14480	None	moderate	MQ	d__Bacteria	p__Actinomycetota	c__Coriobacteriia	o__Coriobacteriales	f__Atopobiaceae	g__Olsenella	Olsenella uli	Plaque
AB1268_Saliva.21	MGYG000000109	950243	UHGG	known	AB1268_Saliva	76.89	1.06	Neural Network (Specific Model)	11	892	44472	3.11356e+16	1521048	43	1455	79	135615	None	substantial	MQ	d__Bacteria	p__Bacillota	c__Bacilli	o__Lactobacillales	f__Streptococcaceae	g__Streptococcus		Saliva
AB1268_Saliva.22	GCF_018128245.1	9842	GTDB	known	AB1268_Saliva	80.83	0.03	Neural Network (Specific Model)	11	868	18178	2.96699e+16	1553371	29	1516	131	68907	None	substantial	MQ	d__Bacteria	p__Fusobacteriota	c__Fusobacteriia	o__Fusobacteriales	f__Leptotrichiaceae	g__JABCPH02	JABCPH02 sp013333235	Saliva
AB1268_Saliva.26	AB1373_Plaque.2	976477	Schmartz_2024	known	AB1268_Saliva	95.14	0.92	Neural Network (Specific Model)	11	857	51079	3.24384e+16	2393628	57	2111	78	182728	None	near	HQ	d__Bacteria	p__Actinomycetota	c__Actinomycetes	o__Actinomycetales	f__Micrococcaceae	g__Rothia	Rothia aeria	Saliva
AB1268_Saliva.5	GCA_905372855.1	9576	GTDB	known	AB1268_Saliva	79.04	0.57	Gradient Boost (General Model)	11	914	4681	2.55002e+16	540842	48	648	122	16909	None	substantial	MQ	d__Bacteria	p__Patescibacteria	c__Saccharimonadia	o__Saccharimonadales	f__Saccharimonadaceae	g__Saccharimonas	Saccharimonas sp905372855	Saliva
AB1268_Saliva.7	AB1325_Saliva.21	957384	Schmartz_2024	known	AB1268_Saliva	74.73	1.43	Gradient Boost (General Model)	11	852	7491	311971314209473	1644785	44	1499	273	109384	None	substantial	MQ	d__Bacteria	p__Bacillota_A	c__Clostridia	o__Lachnospirales	f__Lachnospiraceae	g__Oribacterium	Oribacterium sinus	Saliva
AB1270_Plaque.20	HMP_2012__SRS019026__bin_13	967845	Pasolli_2019	known	AB1270_Plaque	99.08	0.36	Gradient Boost (General Model)	11	932	24018	3.60259e+16	1838088	4	1587	139	80731	None	near	HQ	d__Bacteria	p__Bacteroidota	c__Bacteroidia	o__Bacteroidales	f__UBA932	g__Cryptobacteroides		Plaque
AB1270_Plaque.26	GCF_031191185.1	9844	GTDB	known	AB1270_Plaque	94.68	0.15	Neural Network (Specific Model)	11	857	52986	3299961371318204	2389047	43	2071	80	161518	None	near	HQ	d__Bacteria	p__Bacteroidota	c__Bacteroidia	o__Bacteroidales	f__Bacteroidaceae	g__Prevotella	Prevotella nigrescens	Plaque
AB1270_Plaque.28	GCF_000143845.1	9916	GTDB	known	AB1270_Plaque	61.61	3.53	Neural Network (Specific Model)	11	875	3283	2485765819041987	1437488	65	1691	462	11559	None	moderate	MQ	d__Bacteria	p__Actinomycetota	c__Coriobacteriia	o__Coriobacteriales	f__Atopobiaceae	g__Olsenella	Olsenella uli	Plaque
AB1270_Plaque.43	AB1270_Plaque.25	999999	Schmartz_2024	known	AB1270_Plaque	96.43	0.03	Gradient Boost (General Model)	11	854	121112	3.08936e+16	2058291	62	1901	25	229427	None	near	HQ	d__Bacteria	p__Pseudomonadota	c__Gammaproteobacteria	o__Cardiobacteriales	f__Cardiobacteriaceae	g__		Plaque
AB1270_Plaque.44	AB1270_Plaque.16	999998	Schmartz_2024	known	AB1270_Plaque	97.04	0.29	Gradient Boost (General Model)	11	903	35886	3928682899833979	2356178	47	1807	105	205998	None	near	HQ	d__Bacteria	p__Bacteroidota	c__Bacteroidia	o__Bacteroidales	f__CAJPTX01	g__Bacteroides_D	Bacteroides_D sp905373475	Plaque
AB1270_Plaque.55	GCA_905372495.1	9722	GTDB	known	AB1270_Plaque	63.64	1.82	Neural Network (Specific Model)	11	886	6530	2733996598639456	543583	4	588	105	18778	None	moderate	MQ	d__Bacteria	p__Patescibacteria	c__Saccharimonadia	o__Saccharimonadales	f__Nanosyncoccaceae	g__Nanosyncoccus	Nanosyncoccus sp905372495	Plaque
AB1270_Plaque.65	AB1270_Plaque.59	99809	Schmartz_2024	known	AB1270_Plaque	54.49	1.25	Gradient Boost (General Model)	11	898	2939	2531547619047619	1204710	42	1428	417	11382	None	moderate	MQ	d__Bacteria	p__Bacillota_A	c__Clostridia	o__Lachnospirales	f__Lachnospiraceae	g__Butyrivibrio		Plaque
AB1270_Plaque.9	GCF_900187105.1	9779	GTDB	known	AB1270_Plaque	50.41	1.6	Neural Network (Specific Model)	11	839	3810	2.53968e+16	1150681	57	1269	339	21866	None	moderate	MQ	d__Bacteria	p__Pseudomonadota	c__Gammaproteobacteria	o__Burkholderiales	f__Neisseriaceae	g__Eikenella	Eikenella corrodens	Plaque
AB1270_Plaque.91	AB1046_Plaque.30	963408	Schmartz_2024	known	AB1270_Plaque	98.7	0.08	Neural Network (Specific Model)	11	893	78976	3276168741355463	794226	51	723	19	193449	None	near	HQ	d__Bacteria	p__Patescibacteria	c__Saccharimonadia	o__Saccharimonadales	f__Nanoperiomorbaceae	g__Nanoperiomorbus	Nanoperiomorbus sp905373275	Plaque
AB1270_Plaque.97	AB1270_Plaque.10	999972	Schmartz_2024	known	AB1270_Plaque	94.45	0.13	Neural Network (Specific Model)	11	798	14869	3.18173e+16	3437121	47	2880	320	52243	None	near	HQ	d__Bacteria	p__Bacteroidota	c__Bacteroidia	o__Bacteroidales	f__Bacteroidaceae	g__Prevotella	Prevotella conceptionensis	Plaque
AB1270_Saliva.4	CM_cf__CF_TNFC040IS_t3M15__bin_2	976031	Pasolli_2019	known	AB1270_Saliva	95.33	2.5	Neural Network (Specific Model)	11	91	22571	2.99199e+16	2683179	38	2724	242	90906	None	near	HQ	d__Bacteria	p__Bacteroidota	c__Bacteroidia	o__Flavobacteriales	f__Flavobacteriaceae	g__Capnocytophaga	Capnocytophaga sp937936315	Saliva
AB1270_Saliva.6	GCA_013333605.2	9566	GTDB	known	AB1270_Saliva	76.64	4.52	Gradient Boost (General Model)	4	875	3663	2.5402e+16	753817	36	867	218	21233	None	substantial	MQ	d__Bacteria	p__Patescibacteria	c__JAEDAM01	o__Absconditabacterales	f__Absconditicoccaceae	g__HOT-345	HOT-345 sp013333605	Saliva
AB1270_Saliva.7	GCA_001058355.1	9645	GTDB	known	AB1270_Saliva	71.63	0.27	Gradient Boost (General Model)	11	861	4466	2.57782e+16	1001453	39	1117	257	21068	None	substantial	MQ	d__Bacteria	p__Bacillota	c__Bacilli	o__Lactobacillales	f__Aerococcaceae	g__Granulicatella	Granulicatella sp001058355	Saliva
AB1271_Plaque.14	AB1271_Plaque.17	999995	Schmartz_2024	known	AB1271_Plaque	93.57	0.01	Neural Network (Specific Model)	11	846	30957	3.46499e+16	2209107	54	1799	111	174521	None	near	HQ	d__Bacteria	p__Bacteroidota	c__Bacteroidia	o__Bacteroidales	f__Porphyromonadaceae	g__Porphyromonas	Porphyromonas sp915070105	Plaque
AB1271_Plaque.2	AB1219_Saliva.15	961127	Schmartz_2024	known	AB1271_Plaque	60.09	0.55	Neural Network (Specific Model)	11	921	4436	2802554188635032	1556222	41	1707	395	20750	None	moderate	MQ	d__Bacteria	p__Bacteroidota	c__Bacteroidia	o__Flavobacteriales	f__Flavobacteriaceae	g__Capnocytophaga	Capnocytophaga leadbetteri_A	Plaque
AB1271_Plaque.4	AB1490_Plaque.47	978459	Schmartz_2024	known	AB1271_Plaque	95.48	0.18	Neural Network (Specific Model)	11	925	509368	3130232876712329	739554	48	730	3	509368	None	near	HQ	d__Bacteria	p__Patescibacteria	c__Saccharimonadia	o__Saccharimonadales	f__Nanosynbacteraceae	g__Nanosynbacter		Plaque
AB1271_Plaque.41	GCF_000426665.1	9835	GTDB	known	AB1271_Plaque	64.28	1.2	Neural Network (Specific Model)	11	906	4560	268073677581864	1406163	58	1588	356	16312	None	moderate	MQ	d__Bacteria	p__Bacillota_C	c__Negativicutes	o__Selenomonadales	f__Selenomonadaceae	g__Centipeda	Centipeda artemidis	Plaque
AB1271_Saliva.1	AB1271_Saliva.14	999937	Schmartz_2024	known	AB1271_Saliva	50.1	0.47	Gradient Boost (General Model)	11	912	2896	2468265625	1036708	61	1280	376	8733	None	moderate	MQ	d__Bacteria	p__Pseudomonadota	c__Gammaproteobacteria	o__Cardiobacteriales	f__Cardiobacteriaceae	g__Cardiobacterium	Cardiobacterium hominis	Saliva
AB1271_Saliva.7	MGYG000003190	973012	UHGG	known	AB1271_Saliva	80.67	0.29	Neural Network (Specific Model)	11	847	13717	2921287128712871	1565076	39	1515	167	58155	None	substantial	MQ	d__Bacteria	p__Bacillota_C	c__Negativicutes	o__Veillonellales	f__Veillonellaceae	g__Veillonella	Veillonella rogosae	Saliva
AB1273_Plaque.17	GCF_000467855.2	9631	GTDB	known	AB1273_Plaque	57.74	2.21	Neural Network (Specific Model)	11	879	4023	3.04861e+16	1293860	57	1245	357	12987	None	moderate	MQ	d__Bacteria	p__Bacteroidota	c__Bacteroidia	o__Bacteroidales	f__Porphyromonadaceae	g__Porphyromonas	Porphyromonas sp000467855	Plaque
AB1273_Plaque.20	AB1259_Plaque.27	978944	Schmartz_2024	known	AB1273_Plaque	60.34	4.53	Neural Network (Specific Model)	11	899	4537	2501421287444232	1306851	32	1569	350	19149	None	moderate	MQ	d__Bacteria	p__Fusobacteriota	c__Fusobacteriia	o__Fusobacteriales	f__Leptotrichiaceae	g__Pseudoleptotrichia	Pseudoleptotrichia goodfellowii	Plaque
AB1273_Plaque.7	CM_periimplantitis__SP_602SPI_T016__bin_4	978459	Pasolli_2019	known	AB1273_Plaque	58.5	0.12	Neural Network (Specific Model)	11	834	3731	2.42571e+16	1238396	57	1421	362	13360	None	moderate	MQ	d__Bacteria	p__Pseudomonadota	c__Gammaproteobacteria	o__Burkholderiales	f__Neisseriaceae	g__Eikenella	Eikenella corrodens	Plaque
AB1273_Saliva.12	AB1135_Throat.3	976706	Schmartz_2024	known	AB1273_Saliva	68.84	0.51	Neural Network (Specific Model)	11	818	4898	2.54305e+16	1810709	52	1944	424	30459	None	moderate	MQ	d__Bacteria	p__Pseudomonadota	c__Gammaproteobacteria	o__Burkholderiales	f__Neisseriaceae	g__Neisseria		Saliva
AB1273_Saliva.13	AB1301_Throat.16	976223	Schmartz_2024	known	AB1273_Saliva	50.31	1.42	Neural Network (Specific Model)	11	9	2938	2597843137254902	925852	33	1071	333	14821	None	moderate	MQ	d__Bacteria	p__Fusobacteriota	c__Fusobacteriia	o__Fusobacteriales	f__Leptotrichiaceae	g__Leptotrichia_A	Leptotrichia_A sp000469505	Saliva
AB1273_Saliva.17	MGYG000002898	995223	UHGG	known	AB1273_Saliva	58.71	1.51	Neural Network (Specific Model)	11	901	3940	2600357414448669	1137147	43	1315	322	14778	None	moderate	MQ	d__Bacteria	p__Pseudomonadota	c__Gammaproteobacteria	o__Enterobacterales	f__Pasteurellaceae	g__Haemophilus_D	Haemophilus_D pittmaniae	Saliva
AB1273_Saliva.7	AB1043_Saliva.37	967441	Schmartz_2024	known	AB1273_Saliva	75.13	0.1	Gradient Boost (General Model)	11	858	5229	2.66215e+16	1023396	39	1101	230	20744	None	substantial	MQ	d__Bacteria	p__Bacillota	c__Bacilli	o__Lactobacillales	f__Aerococcaceae	g__Granulicatella	Granulicatella sp001058355	Saliva
AB1275_Plaque.1	AB1275_Plaque.12	998695	Schmartz_2024	known	AB1275_Plaque	57.39	0.9	Gradient Boost (General Model)	11	921	2919	2517311320754717	866713	57	1060	306	8378	None	moderate	MQ	d__Bacteria	p__Bacillota_A	c__Clostridia	o__Lachnospirales	f__Lachnospiraceae	g__Moryella	Moryella longum	Plaque
AB1275_Plaque.31	MGYG000001342	962313	UHGG	known	AB1275_Plaque	95.05	0.02	Neural Network (Specific Model)	11	888	61940	3.06459e+16	2138467	4	2070	48	173495	None	near	HQ	d__Bacteria	p__Bacillota	c__Bacilli	o__Lactobacillales	f__Streptococcaceae	g__Streptococcus	Streptococcus gordonii	Plaque
AB1275_Plaque.34	GCF_000257845.1	9785	GTDB	known	AB1275_Plaque	79.69	0.02	Neural Network (Specific Model)	11	906	71966	3.17028e+16	1447175	41	1381	29	143282	None	substantial	MQ	d__Bacteria	p__Bacillota	c__Bacilli	o__Lactobacillales	f__Streptococcaceae	g__Streptococcus	Streptococcus oralis_W	Plaque
AB1275_Plaque.36	AB1720_Plaque.36	991178	Schmartz_2024	known	AB1275_Plaque	99.46	1.03	Neural Network (Specific Model)	11	897	241361	3250675306957708	1592500	41	1466	12	379603	None	near	HQ	d__Bacteria	p__Bacillota_A	c__Clostridia	o__Peptostreptococcales	f__Anaerovoracaceae	g__Mogibacterium	Mogibacterium neglectum	Plaque
AB1275_Plaque.37	GCF_000803625.1	9832	GTDB	known	AB1275_Plaque	99.92	0.19	Neural Network (Specific Model)	11	926	401583	308139367816092	693193	45	696	2	401583	None	near	HQ	d__Bacteria	p__Patescibacteria	c__Saccharimonadia	o__Saccharimonadales	f__Nanosynbacteraceae	g__Nanosynbacter	Nanosynbacter lyticus	Plaque
AB1275_Plaque.39	AB1275_Plaque.30	999993	Schmartz_2024	known	AB1275_Plaque	59.51	0.94	Neural Network (Specific Model)	11	889	4372	2.47707e+16	1057925	46	1268	272	15078	None	moderate	MQ	d__Bacteria	p__Bacillota	c__Bacilli	o__Lactobacillales	f__Lactobacillaceae	g__Limosilactobacillus		Plaque
AB1275_Plaque.47	AB934_Stool.11	975049	Schmartz_2024	known	AB1275_Plaque	99.34	1.64	Neural Network (Specific Model)	11	911	24743	3.04775e+16	1778794	35	1774	121	73611	None	near	HQ	d__Bacteria	p__Bacillota	c__Bacilli	o__Lactobacillales	f__Lactobacillaceae	g__Lactobacillus	Lactobacillus gasseri	Plaque
AB1275_Plaque.9	GCF_025150565.1	9685	GTDB	known	AB1275_Plaque	68.62	3.39	Gradient Boost (General Model)	11	89	3511	2.41772e+16	1096795	38	1348	340	14471	None	moderate	MQ	d__Bacteria	p__Bacillota	c__Bacilli	o__Lactobacillales	f__Aerococcaceae	g__Granulicatella	Granulicatella adiacens	Plaque
AB1275_Saliva.1	GCA_015258095.1	9742	GTDB	known	AB1275_Saliva	68.18	1.36	Gradient Boost (General Model)	11	899	3932	2.64312e+16	1448836	46	1647	424	15608	None	moderate	MQ	d__Bacteria	p__Bacillota_A	c__Clostridia	o__Lachnospirales	f__Lachnospiraceae	g__Oribacterium	Oribacterium sp015258095	Saliva
AB1275_Saliva.13	GCA_937976325.1	964	GTDB	known	AB1275_Saliva	60.85	0.93	Gradient Boost (General Model)	11	876	3404	2349399428026692	842055	4	1049	277	14931	None	moderate	MQ	d__Bacteria	p__Bacillota	c__Bacilli	o__Lactobacillales	f__Aerococcaceae	g__Granulicatella	Granulicatella sp937976325	Saliva
AB1275_Saliva.19	AB1275_Saliva.13	999999	Schmartz_2024	known	AB1275_Saliva	96.34	0.09	Neural Network (Specific Model)	11	87	445371	3.44847e+16	1834900	47	1545	7	508285	None	near	HQ	d__Bacteria	p__Actinomycetota	c__Actinomycetes	o__Actinomycetales	f__Bifidobacteriaceae	g__Alloscardovia	Alloscardovia omnicolens	Saliva
AB1275_Saliva.23	GCF_000278725.1	9783	GTDB	known	AB1275_Saliva	99.97	0.3	Neural Network (Specific Model)	11	883	51690	3501738693467337	2364185	65	1990	79	188313	None	near	HQ	d__Bacteria	p__Actinomycetota	c__Actinomycetes	o__Actinomycetales	f__Actinomycetaceae	g__Pauljensenia	Pauljensenia sp000278725	Saliva
AB1275_Saliva.3	AB1176_Eye.11	97875	Schmartz_2024	known	AB1275_Saliva	64.72	2.19	Neural Network (Specific Model)	11	855	4479	2.91309e+16	1735194	42	1701	452	22046	None	moderate	MQ	d__Bacteria	p__Bacteroidota	c__Bacteroidia	o__Bacteroidales	f__Bacteroidaceae	g__Prevotella	Prevotella histicola	Saliva
AB1275_Saliva.30	AB1275_Saliva.15	999969	Schmartz_2024	known	AB1275_Saliva	76.38	0.91	Neural Network (Specific Model)	11	902	4040	2508919382504288	1457378	4	1749	417	17180	None	substantial	MQ	d__Bacteria	p__Pseudomonadota	c__Gammaproteobacteria	o__Enterobacterales	f__Pasteurellaceae	g__Haemophilus_D	Haemophilus_D sp927911595	Saliva
AB1275_Saliva.33	AB1292_Saliva.2	982863	Schmartz_2024	known	AB1275_Saliva	61.7	0.19	Neural Network (Specific Model)	11	907	5612	2767952218430034	1071059	45	1172	237	31273	None	moderate	MQ	d__Bacteria	p__Bacillota_C	c__Negativicutes	o__Veillonellales	f__Veillonellaceae	g__Veillonella	Veillonella sp900550455	Saliva
AB1276_Plaque.40	AB1485_Plaque.19	978991	Schmartz_2024	known	AB1276_Plaque	67.3	2.17	Neural Network (Specific Model)	11	92	6584	2.658e+16	531000	48	614	96	22993	None	moderate	MQ	d__Bacteria	p__Patescibacteria	c__Saccharimonadia	o__Saccharimonadales	f__Saccharimonadaceae	g__Saccharimonas		Plaque
AB1276_Plaque.46	HMP_2012__SRS017227__bin_41	988263	Pasolli_2019	known	AB1276_Plaque	59.86	1.3	Neural Network (Specific Model)	11	881	3712	2676464124111183	1406785	45	1547	417	11831	None	moderate	MQ	d__Bacteria	p__Bacteroidota	c__Bacteroidia	o__Bacteroidales	f__Bacteroidaceae	g__Prevotella	Prevotella pleuritidis	Plaque
AB1276_Plaque.50	AB1403_Plaque.6	988481	Schmartz_2024	known	AB1276_Plaque	74.35	0.76	Neural Network (Specific Model)	11	935	8830	2769335394126739	573283	52	647	76	42334	None	substantial	MQ	d__Bacteria	p__Patescibacteria	c__Saccharimonadia	o__Saccharimonadales	f__Nanosynbacteraceae	g__Nanosynbacter		Plaque
AB1276_Plaque.52	GCA_000488855.1	9901	GTDB	known	AB1276_Plaque	66.8	0.2	Neural Network (Specific Model)	11	886	87695	3408573216520651	920435	38	799	12	231125	None	moderate	MQ	d__Bacteria	p__Bacillota_A	c__Clostridia	o__Peptostreptococcales	f__Anaerovoracaceae	g__Gallibacter	Gallibacter brachus	Plaque
AB1276_Plaque.55	AB1276_Plaque.9	998481	Schmartz_2024	known	AB1276_Plaque	65.9	0.38	Neural Network (Specific Model)	11	831	3269	2533395739186572	1413063	5	1549	463	12185	None	moderate	MQ	d__Bacteria	p__Campylobacterota	c__Campylobacteria	o__Campylobacterales	f__Campylobacteraceae	g__Campylobacter_B		Plaque
AB1276_Saliva.40	AB1276_Saliva.5	999804	Schmartz_2024	known	AB1276_Saliva	72.8	0.72	Neural Network (Specific Model)	11	878	3494	2.56084e+16	1088759	37	1248	340	15919	None	substantial	MQ	d__Bacteria	p__Campylobacterota	c__Campylobacteria	o__Campylobacterales	f__Campylobacteraceae	g__Campylobacter_B		Saliva
AB1276_Saliva.8	HMP_2012__SRS022532__bin_2	970158	Pasolli_2019	known	AB1276_Saliva	58.25	2.56	Gradient Boost (General Model)	11	888	4153	2626666666666667	1204446	34	1359	340	18635	None	moderate	MQ	d__Bacteria	p__Bacillota	c__Bacilli	o__Lactobacillales	f__Aerococcaceae	g__Granulicatella	Granulicatella sp937891475	Saliva
AB1278_Plaque.18	AB1663_Plaque.49	991021	Schmartz_2024	known	AB1278_Plaque	74.8	0.67	Gradient Boost (General Model)	11	904	3729	2737537372147915	1152136	38	1271	340	10237	None	substantial	MQ	d__Bacteria	p__Bacillota_A	c__Clostridia	o__Peptostreptococcales	f__Anaerovoracaceae	g__CAJPNN01	CAJPNN01 sp905372035	Plaque
AB1278_Plaque.26	AB1278_Plaque.12	999971	Schmartz_2024	known	AB1278_Plaque	82.06	1.15	Neural Network (Specific Model)	11	923	5188	2.92783e+16	2193795	48	2310	505	19653	None	substantial	MQ	d__Bacteria	p__Spirochaetota	c__Spirochaetia	o__Treponematales	f__Treponemataceae	g__Treponema_C	Treponema_C sp905372025	Plaque
AB1278_Plaque.34	GCF_902491705.1	9991	GTDB	known	AB1278_Plaque	99.9	0.47	Neural Network (Specific Model)	11	893	19919	3.00546e+16	2257088	36	2238	171	65995	None	near	HQ	d__Bacteria	p__Bacillota	c__Bacilli	o__Lactobacillales	f__Lactobacillaceae	g__Lactobacillus	Lactobacillus sp902491705	Plaque
AB1278_Plaque.60	AB1490_Plaque.43	984214	Schmartz_2024	known	AB1278_Plaque	58.72	0.3	Neural Network (Specific Model)	11	856	4661	3024641080312722	1488438	52	1407	361	20399	None	moderate	MQ	d__Bacteria	p__Bacteroidota	c__Bacteroidia	o__Bacteroidales	f__Bacteroidaceae	g__Prevotella	Prevotella denticola	Plaque
AB1278_Plaque.64	AB1278_Plaque.14	999998	Schmartz_2024	known	AB1278_Plaque	96.95	0.84	Neural Network (Specific Model)	11	856	95374	3564260226283725	2866492	65	2298	51	212701	None	near	HQ	d__Bacteria	p__Actinomycetota	c__Actinomycetes	o__Actinomycetales	f__Bifidobacteriaceae	g__Bifidobacterium	Bifidobacterium scardovii	Plaque
AB1278_Plaque.68	GCF_014287335.1	9715	GTDB	known	AB1278_Plaque	54.81	1.9	Neural Network (Specific Model)	11	87	4788	2.59581e+16	1148021	39	1285	280	18796	None	moderate	MQ	d__Bacteria	p__Bacillota	c__Bacilli	o__Lactobacillales	f__Streptococcaceae	g__Streptococcus	Streptococcus hominis	Plaque
AB1278_Plaque.80	AB1278_Plaque.56	999994	Schmartz_2024	known	AB1278_Plaque	94.55	0.45	Neural Network (Specific Model)	11	908	423562	3.02449e+16	834855	48	837	2	423562	None	near	HQ	d__Bacteria	p__Patescibacteria	c__Saccharimonadia	o__Saccharimonadales	f__Saccharimonadaceae	g__Saccharimonas		Plaque
AB1278_Plaque.93	AB1278_Plaque.7	999998	Schmartz_2024	known	AB1278_Plaque	97.84	0.76	Neural Network (Specific Model)	11	906	37280	3261489361702128	810518	51	752	30	182454	None	near	HQ	d__Bacteria	p__Patescibacteria	c__Saccharimonadia	o__Saccharimonadales	f__Nanoperiomorbaceae	g__Nanoperiomorbus		Plaque
AB1278_Plaque.96	GCF_000429225.1	9758	GTDB	known	AB1278_Plaque	57.76	1.34	Neural Network (Specific Model)	11	884	4712	3.23633e+16	1869483	74	1705	482	24137	None	moderate	MQ	d__Bacteria	p__Actinomycetota	c__Actinomycetes	o__Actinomycetales	f__Actinomycetaceae	g__Actinomyces	Actinomyces dentalis	Plaque
AB1278_Saliva.12	HeQ_2017__SZAXPI029474-42__bin_12	995952	Pasolli_2019	known	AB1278_Saliva	59.35	1.35	Neural Network (Specific Model)	11	88	3703	2.46442e+16	1159963	35	1384	350	16997	None	moderate	MQ	d__Bacteria	p__Bacillota_C	c__Negativicutes	o__Veillonellales	f__Dialisteraceae	g__Allisonella	Allisonella pneumosinta	Saliva
AB1278_Saliva.16	GCA_010604095.1	9801	GTDB	known	AB1278_Saliva	92.73	0.24	Neural Network (Specific Model)	11	885	45627	3.06234e+16	1884718	4	1818	69	134650	None	near	HQ	d__Bacteria	p__Bacillota	c__Bacilli	o__Lactobacillales	f__Streptococcaceae	g__Streptococcus	Streptococcus sp000187445	Saliva
AB1278_Saliva.25	AB1278_Saliva.44	998514	Schmartz_2024	known	AB1278_Saliva	51.15	0.44	Neural Network (Specific Model)	11	918	3651	2813164871582436	1107149	56	1207	327	13512	None	moderate	MQ	d__Bacteria	p__Actinomycetota	c__Actinomycetes	o__Actinomycetales	f__Actinomycetaceae	g__Pauljensenia	Pauljensenia sp000308055	Saliva
AB1278_Saliva.38	GCF_000711965.1	9919	GTDB	known	AB1278_Saliva	62.3	1.82	Neural Network (Specific Model)	11	857	8525	3.05115e+16	2394251	72	2246	361	41199	None	moderate	MQ	d__Bacteria	p__Actinomycetota	c__Actinomycetes	o__Actinomycetales	f__Actinomycetaceae	g__Actinomyces	Actinomyces israelii	Saliva
AB1278_Saliva.41	GCF_000174015.1	9728	GTDB	known	AB1278_Saliva	74.73	0.5	Neural Network (Specific Model)	11	9	5077	288660542432196	1097552	5	1143	236	22583	None	substantial	MQ	d__Bacteria	p__Actinomycetota	c__Coriobacteriia	o__Coriobacteriales	f__Atopobiaceae	g__Lancefieldella	Lancefieldella rimae	Saliva
AB1279_Plaque.16	AB1279_Plaque.13	99996	Schmartz_2024	known	AB1279_Plaque	71.28	1.13	Neural Network (Specific Model)	11	897	3532	2.66097e+16	3250240	68	3660	1010	14399	None	substantial	MQ	d__Bacteria	p__Pseudomonadota	c__Gammaproteobacteria	o__Xanthomonadales	f__Xanthomonadaceae	g__Stenotrophomonas	Stenotrophomonas pavanii	Plaque
AB1279_Plaque.40	AB1279_Plaque.6	999995	Schmartz_2024	known	AB1279_Plaque	87.51	0.03	Neural Network (Specific Model)	11	859	35371	2.87188e+16	930045	52	930	37	132388	None	substantial	MQ	d__Bacteria	p__Patescibacteria	c__Saccharimonadia	o__Saccharimonadales	f__Saccharimonadaceae	g__Saccharimonas	Saccharimonas sp937898545	Plaque
AB1279_Plaque.69	AB1322_Plaque.4	984354	Schmartz_2024	known	AB1279_Plaque	72.71	1.54	Gradient Boost (General Model)	11	871	4155	2.71593e+16	1599641	37	1714	440	14041	None	substantial	MQ	d__Bacteria	p__Bacillota_A	c__Clostridia	o__Lachnospirales	f__Lachnospiraceae	g__Johnsonella	Johnsonella sp900766185	Plaque
AB1279_Plaque.77	AB1279_Plaque.43	999999	Schmartz_2024	known	AB1279_Plaque	99.59	0.04	Neural Network (Specific Model)	11	901	163916	2983987823439878	651643	36	657	8	194342	None	near	HQ	d__Bacteria	p__Patescibacteria	c__Saccharimonadia	o__Saccharimonadales	f__Nanogingivalaceae	g__Nanogingivalis	Nanogingivalis sp013333405	Plaque
AB1279_Saliva.35	GCF_006546825.1	9698	GTDB	known	AB1279_Saliva	50.19	4.1	Neural Network (Specific Model)	11	879	2997	2782024403771492	1708990	7	1803	582	19408	None	moderate	MQ	d__Bacteria	p__Actinomycetota	c__Actinomycetes	o__Actinomycetales	f__Actinomycetaceae	g__Actinomyces	Actinomyces oris	Saliva
AB1279_Saliva.40	GCF_938018165.1	9564	GTDB	known	AB1279_Saliva	72.2	2.89	Neural Network (Specific Model)	11	918	4337	2672166030534351	1826691	41	2096	474	14938	None	substantial	MQ	d__Bacteria	p__Bacteroidota	c__Bacteroidia	o__Flavobacteriales	f__Flavobacteriaceae	g__Capnocytophaga	Capnocytophaga leadbetteri_A	Saliva
AB1279_Saliva.55	AB1303_Saliva.38	969387	Schmartz_2024	known	AB1279_Saliva	55.19	0.41	Gradient Boost (General Model)	4	873	2985	2.45938e+16	690473	38	819	240	12645	None	moderate	MQ	d__Bacteria	p__Patescibacteria	c__JAEDAM01	o__Absconditabacterales	f__Absconditicoccaceae	g__HOT-345	HOT-345 sp003260355	Saliva
AB1279_Saliva.67	GCA_916438765.1	9579	GTDB	known	AB1279_Saliva	70.21	0	Gradient Boost (General Model)	11	862	9051	2711075050709939	929125	4	986	135	48726	None	substantial	MQ	d__Bacteria	p__Bacillota	c__Bacilli	o__Lactobacillales	f__Aerococcaceae	g__Granulicatella	Granulicatella sp916438765	Saliva
AB1279_Saliva.68	GCF_000160075.2	9564	GTDB	known	AB1279_Saliva	59.61	0.52	Neural Network (Specific Model)	11	907	6783	2.83233e+16	1183619	48	1266	216	42440	None	moderate	MQ	d__Bacteria	p__Bacillota	c__Bacilli	o__Lactobacillales	f__Aerococcaceae	g__Abiotrophia	Abiotrophia defectiva	Saliva
AB1281_Plaque.1	AB1281_Plaque.15	99999	Schmartz_2024	known	AB1281_Plaque	61.45	0.52	Gradient Boost (General Model)	11	89	3307	2.71184e+16	1433657	57	1572	471	17177	None	moderate	MQ	d__Bacteria	p__Bacillota_A	c__Clostridia	o__Lachnospirales	f__Lachnospiraceae	g__Oribacterium	Oribacterium sp000160135	Plaque
AB1281_Plaque.4	AB1348_Plaque.9	994039	Schmartz_2024	known	AB1281_Plaque	99.35	0.53	Neural Network (Specific Model)	11	85	73722	2879787849566056	1051960	52	1037	17	142102	None	near	HQ	d__Bacteria	p__Patescibacteria	c__Saccharimonadia	o__Saccharimonadales	f__Saccharimonadaceae	g__Saccharimonas		Plaque
AB1283_Saliva.16	AB1792_Saliva.6	976744	Schmartz_2024	known	AB1283_Saliva	85.67	1.95	Neural Network (Specific Model)	11	862	23541	342373532068654	2632473	42	2214	191	69724	None	substantial	MQ	d__Bacteria	p__Bacteroidota	c__Bacteroidia	o__Bacteroidales	f__Bacteroidaceae	g__Prevotella	Prevotella salivae	Saliva
AB1283_Saliva.23	GCF_000701685.1	9553	GTDB	known	AB1283_Saliva	50.98	0.33	Neural Network (Specific Model)	11	882	60343	314459584295612	925781	29	866	23	135250	None	moderate	MQ	d__Bacteria	p__Bacillota	c__Bacilli	o__Staphylococcales	f__Gemellaceae	g__Gemella	Gemella sanguinis	Saliva
AB1283_Saliva.41	GCF_013393365.1	968	GTDB	known	AB1283_Saliva	62.11	0.03	Neural Network (Specific Model)	11	912	113502	3.27376e+16	981209	38	913	21	240063	None	moderate	MQ	d__Bacteria	p__Bacillota_C	c__Negativicutes	o__Veillonellales	f__Veillonellaceae	g__Veillonella	Veillonella nakazawae	Saliva
AB1284_Plaque.17	HMP_2012__SRS013261__bin_6	99397	Pasolli_2019	known	AB1284_Plaque	61.36	1.91	Neural Network (Specific Model)	11	902	2811	2.48548e+16	1442509	6	1751	526	13888	None	moderate	MQ	d__Bacteria	p__Actinomycetota	c__Actinomycetes	o__Propionibacteriales	f__Propionibacteriaceae	g__Cutibacterium	Cutibacterium acnes	Plaque
AB1284_Plaque.22	AB1759_Throat.2	950117	Schmartz_2024	known	AB1284_Plaque	94.8	0.35	Neural Network (Specific Model)	11	911	223059	2998542372881356	871093	48	885	9	235342	None	near	HQ	d__Bacteria	p__Patescibacteria	c__Saccharimonadia	o__Saccharimonadales	f__Saccharimonadaceae	g__Saccharimonas		Plaque
AB1284_Plaque.28	AB1284_Plaque.24	999924	Schmartz_2024	known	AB1284_Plaque	58.27	1.9	Neural Network (Specific Model)	11	855	2975	2535978947368421	1686361	62	1900	582	13572	None	moderate	MQ	d__Bacteria	p__Actinomycetota	c__Coriobacteriia	o__Coriobacteriales	f__Atopobiaceae	g__Olsenella_F	Olsenella_F sp001189515	Plaque
AB1284_Plaque.34	AB1493_Stool.31	982597	Schmartz_2024	known	AB1284_Plaque	89.87	1.02	Gradient Boost (General Model)	11	879	6768	2750	1556512	42	1660	323	52039	None	substantial	MQ	d__Bacteria	p__Bacillota_A	c__Clostridia	o__Oscillospirales	f__Acutalibacteraceae	g__Ruminococcus_E	Ruminococcus_E bromii	Plaque
AB1284_Saliva.27	AB1284_Saliva.23	999706	Schmartz_2024	known	AB1284_Saliva	62.2	2	Neural Network (Specific Model)	11	891	5528	2869125874125874	827598	49	858	180	27390	None	moderate	MQ	d__Bacteria	p__Actinomycetota	c__Coriobacteriia	o__Coriobacteriales	f__Atopobiaceae	g__Lancefieldella	Lancefieldella sp000564995	Saliva
AB1284_Saliva.31	AB1284_Saliva.3	100	Schmartz_2024	known	AB1284_Saliva	98.35	0.27	Neural Network (Specific Model)	11	91	319040	3051640378548896	636576	42	634	3	319040	None	near	HQ	d__Bacteria	p__Patescibacteria	c__Saccharimonadia	o__Saccharimonadales	f__Nanosyncoccaceae	g__Nanosyncoccus		Saliva
AB1284_Saliva.38	AB1422_Forehead.7	983165	Schmartz_2024	known	AB1284_Saliva	100	0.07	Neural Network (Specific Model)	11	908	126543	3.17103e+16	1896964	39	1813	31	194875	None	perfect	HQ	d__Bacteria	p__Pseudomonadota	c__Gammaproteobacteria	o__Enterobacterales	f__Pasteurellaceae	g__Haemophilus_D	Haemophilus_D sp905215245	Saliva
AB1284_Saliva.39	AB1284_Saliva.1	999819	Schmartz_2024	known	AB1284_Saliva	57.19	1.03	Neural Network (Specific Model)	11	91	3034	2.54654e+16	1292050	58	1542	445	14333	None	moderate	MQ	d__Bacteria	p__Bacillota_C	c__Negativicutes	o__Selenomonadales	f__Selenomonadaceae	g__CAJPQU01		Saliva
AB1284_Saliva.49	AB1284_Saliva.10	998992	Schmartz_2024	known	AB1284_Saliva	79.33	1.89	Neural Network (Specific Model)	11	834	3665	2524895666131621	1692363	46	1869	500	18142	None	substantial	MQ	d__Bacteria	p__Campylobacterota	c__Campylobacteria	o__Campylobacterales	f__Campylobacteraceae	g__Campylobacter_A	Campylobacter_A rectus	Saliva
AB1284_Saliva.6	GCF_938029485.1	9691	GTDB	known	AB1284_Saliva	59.67	1.93	Neural Network (Specific Model)	11	921	2933	3034970906068163	1186666	48	1203	424	10531	None	moderate	MQ	d__Bacteria	p__Spirochaetota	c__Spirochaetia	o__Treponematales	f__Treponemataceae	g__Treponema	Treponema sp938029485	Saliva
AB1285_Plaque.24	AB1485_Plaque.19	977567	Schmartz_2024	known	AB1285_Plaque	97.01	0.59	Neural Network (Specific Model)	11	906	785716	2968039950062422	785716	47	801	1	785716	None	near	HQ	d__Bacteria	p__Patescibacteria	c__Saccharimonadia	o__Saccharimonadales	f__Saccharimonadaceae	g__Saccharimonas		Plaque
AB1285_Plaque.29	AB1413_Plaque.9	972288	Schmartz_2024	known	AB1285_Plaque	99.56	0.29	Neural Network (Specific Model)	11	828	83824	3073587159387831	2977184	62	2679	60	174466	None	near	HQ	d__Bacteria	p__Actinomycetota	c__Coriobacteriia	o__Coriobacteriales	f__Atopobiaceae	g__Olsenella_F	Olsenella_F sp001189515	Plaque
AB1285_Plaque.37	AB1068_Plaque.26	969346	Schmartz_2024	known	AB1285_Plaque	57.79	1.34	Gradient Boost (General Model)	11	882	3401	2365772659732541	1080843	38	1346	342	11347	None	moderate	MQ	d__Bacteria	p__Bacillota	c__Bacilli	o__Lactobacillales	f__Aerococcaceae	g__Granulicatella	Granulicatella adiacens	Plaque
AB1285_Plaque.45	AB1285_Plaque.4	999725	Schmartz_2024	known	AB1285_Plaque	59.17	0.23	Neural Network (Specific Model)	11	827	3818	2397485380116959	1337338	57	1539	393	15288	None	moderate	MQ	d__Bacteria	p__Pseudomonadota	c__Gammaproteobacteria	o__Burkholderiales	f__Neisseriaceae	g__Eikenella		Plaque
AB1285_Saliva.22	AB1285_Saliva.14	999588	Schmartz_2024	known	AB1285_Saliva	55.26	1.2	Neural Network (Specific Model)	11	86	3227	2.94863e+16	1358649	42	1323	433	14576	None	moderate	MQ	d__Bacteria	p__Bacteroidota	c__Bacteroidia	o__Bacteroidales	f__Bacteroidaceae	g__Prevotella	Prevotella melaninogenica	Saliva
AB1285_Saliva.23	GCF_030371665.1	9713	GTDB	known	AB1285_Saliva	73.34	3.71	Neural Network (Specific Model)	11	87	6054	2903587548638132	2570337	69	2570	542	54244	None	substantial	MQ	d__Bacteria	p__Actinomycetota	c__Actinomycetes	o__Actinomycetales	f__Actinomycetaceae	g__Actinomyces	Actinomyces sp915069725	Saliva
AB1285_Saliva.27	GCA_905372855.1	953	GTDB	known	AB1285_Saliva	70.13	0.39	Neural Network (Specific Model)	11	882	13123	2799169278996865	606438	48	638	70	40172	None	substantial	MQ	d__Bacteria	p__Patescibacteria	c__Saccharimonadia	o__Saccharimonadales	f__Saccharimonadaceae	g__Saccharimonas	Saccharimonas sp905372855	Saliva
AB1285_Saliva.31	GCA_916710115.1	9864	GTDB	known	AB1285_Saliva	60.15	0.72	Neural Network (Specific Model)	11	919	3902	2.79206e+16	1099810	35	1208	316	18041	None	moderate	MQ	d__Bacteria	p__Bacteroidota	c__Bacteroidia	o__Flavobacteriales	f__Weeksellaceae	g__Bergeyella_A	Bergeyella_A sp916710115	Saliva
AB1288_Plaque.10	AB1288_Saliva.22	987588	Schmartz_2024	known	AB1288_Plaque	99.86	0.22	Neural Network (Specific Model)	11	883	234520	3.48973e+16	1639855	51	1385	10	361324	None	near	HQ	d__Bacteria	p__Actinomycetota	c__Coriobacteriia	o__Coriobacteriales	f__Eggerthellaceae	g__Cryptobacterium	Cryptobacterium curtum	Plaque
AB1288_Plaque.22	GCF_900186465.1	9829	GTDB	known	AB1288_Plaque	84.02	0.23	Neural Network (Specific Model)	11	904	72114	3.21341e+16	2070613	58	1946	56	248697	None	substantial	MQ	d__Bacteria	p__Bacillota_C	c__Negativicutes	o__Selenomonadales	f__Selenomonadaceae	g__Centipeda	Centipeda felix	Plaque
AB1288_Plaque.27	AB1288_Plaque.28	999992	Schmartz_2024	known	AB1288_Plaque	65.63	1.11	Neural Network (Specific Model)	11	892	3715	2.71665e+16	1599771	62	1755	477	13612	None	moderate	MQ	d__Bacteria	p__Desulfobacterota	c__Desulfobulbia	o__Desulfobulbales	f__Desulfobulbaceae	g__Desulfobulbus	Desulfobulbus oralis	Plaque
AB1288_Plaque.30	GCA_900766185.1	9798	GTDB	known	AB1288_Plaque	57.21	3.12	Gradient Boost (General Model)	11	873	3028	2.52993e+16	1367982	37	1576	483	12010	None	moderate	MQ	d__Bacteria	p__Bacillota_A	c__Clostridia	o__Lachnospirales	f__Lachnospiraceae	g__Johnsonella	Johnsonella sp900766185	Plaque
AB1288_Plaque.33	AB1288_Plaque.37	999814	Schmartz_2024	known	AB1288_Plaque	52.61	0.19	Neural Network (Specific Model)	11	833	3617	2456914979757085	1089664	48	1235	327	19711	None	moderate	MQ	d__Bacteria	p__Campylobacterota	c__Campylobacteria	o__Campylobacterales	f__Campylobacteraceae	g__Campylobacter_B	Campylobacter_B sp937997405	Plaque
AB1288_Plaque.34	MGYG000002387	996705	UHGG	known	AB1288_Plaque	99.94	0.88	Neural Network (Specific Model)	11	894	50265	3.01084e+16	1895873	35	1879	59	139104	None	near	HQ	d__Bacteria	p__Bacillota	c__Bacilli	o__Lactobacillales	f__Lactobacillaceae	g__Lactobacillus	Lactobacillus paragasseri	Plaque
AB1288_Plaque.43	AB1660_Throat.20	97483	Schmartz_2024	known	AB1288_Plaque	99.87	0.06	Neural Network (Specific Model)	11	877	47638	2994212034383954	1785043	4	1745	60	156168	None	near	HQ	d__Bacteria	p__Bacillota	c__Bacilli	o__Lactobacillales	f__Lactobacillaceae	g__Limosilactobacillus	Limosilactobacillus vaginalis	Plaque
AB1288_Plaque.49	AB1489_Plaque.2	982216	Schmartz_2024	known	AB1288_Plaque	68.1	0.77	Gradient Boost (General Model)	11	904	4333	2.62954e+16	1381068	56	1586	358	22491	None	moderate	MQ	d__Bacteria	p__Bacillota_C	c__Negativicutes	o__Selenomonadales	f__Selenomonadaceae	g__CAJPQU01	CAJPQU01 sp905372875	Plaque
AB1288_Plaque.62	GCF_014196225.1	9814	GTDB	known	AB1288_Plaque	93.12	2.63	Neural Network (Specific Model)	11	869	16767	3244409448818898	3266441	46	2921	311	57202	None	near	HQ	d__Bacteria	p__Bacteroidota	c__Bacteroidia	o__Bacteroidales	f__Bacteroidaceae	g__Bacteroides	Bacteroides pyogenes_A	Plaque
AB1288_Saliva.10	AB1288_Saliva.7	99998	Schmartz_2024	known	AB1288_Saliva	64.47	0.89	Gradient Boost (General Model)	11	874	3135	2610858143607706	1531770	44	1713	522	10621	None	moderate	MQ	d__Bacteria	p__Bacillota_A	c__Clostridia	o__Lachnospirales	f__Lachnospiraceae	g__Oribacterium	Oribacterium sinus	Saliva
AB1288_Saliva.27	AB1288_Saliva.20	999979	Schmartz_2024	known	AB1288_Saliva	56.3	1.57	Neural Network (Specific Model)	11	911	2888	2.40068e+16	1040296	4	1318	377	11532	None	moderate	MQ	d__Bacteria	p__Pseudomonadota	c__Gammaproteobacteria	o__Enterobacterales	f__Pasteurellaceae	g__Haemophilus_D	Haemophilus_D sp927911595	Saliva
AB1292_Plaque.33	AB1176_Throat.6	991507	Schmartz_2024	known	AB1292_Plaque	53.97	1.89	Gradient Boost (General Model)	11	886	3297	2.64324e+16	1386918	65	1553	446	11172	None	moderate	MQ	d__Bacteria	p__Actinomycetota	c__Coriobacteriia	o__Coriobacteriales	f__Atopobiaceae	g__Olsenella_F	Olsenella_F profusa	Plaque
AB1292_Plaque.4	GCA_905372155.1	9852	GTDB	known	AB1292_Plaque	73.14	3.84	Neural Network (Specific Model)	11	883	4385	2.69521e+16	2604663	66	2852	687	32918	None	substantial	MQ	d__Bacteria	p__Actinomycetota	c__Actinomycetes	o__Propionibacteriales	f__Propionibacteriaceae	g__Arachnia	Arachnia sp905372155	Plaque
AB1292_Plaque.44	GCF_000185385.1	9819	GTDB	known	AB1292_Plaque	67.87	1.09	Gradient Boost (General Model)	11	916	3501	2.58056e+16	1541699	37	1828	475	15882	None	moderate	MQ	d__Bacteria	p__Bacillota_A	c__Clostridia	o__Lachnospirales	f__Lachnospiraceae	g__Lachnoanaerobaculum	Lachnoanaerobaculum saburreum	Plaque
AB1292_Plaque.67	AB1322_Plaque.50	980091	Schmartz_2024	known	AB1292_Plaque	99.69	0.63	Neural Network (Specific Model)	11	834	49507	2797910079051383	2033507	56	2024	64	94579	None	near	HQ	d__Bacteria	p__Pseudomonadota	c__Gammaproteobacteria	o__Burkholderiales	f__Neisseriaceae	g__Eikenella		Plaque
AB1292_Plaque.7	CM_periimplantitis__SP_162SPI_T016__bin_5	978862	Pasolli_2019	known	AB1292_Plaque	68.08	0.29	Neural Network (Specific Model)	11	874	5519	3.02673e+16	1794661	45	1730	376	18366	None	moderate	MQ	d__Bacteria	p__Bacteroidota	c__Bacteroidia	o__Bacteroidales	f__Bacteroidaceae	g__Prevotella	Prevotella oris	Plaque
AB1292_Plaque.76	AB1471_Plaque.15	993443	Schmartz_2024	known	AB1292_Plaque	50.98	0.14	Neural Network (Specific Model)	11	893	2818	2.35904e+16	313395	36	396	110	8515	None	moderate	MQ	d__Bacteria	p__Patescibacteria	c__Saccharimonadia	o__Saccharimonadales	f__Nanogingivalaceae	g__Nanogingivalis	Nanogingivalis sp900555945	Plaque
AB1292_Plaque.90	AB840_Plaque.38	983201	Schmartz_2024	known	AB1292_Plaque	58.97	0.8	Neural Network (Specific Model)	11	925	6552	2.72275e+16	426329	48	484	72	24762	None	moderate	MQ	d__Bacteria	p__Patescibacteria	c__Saccharimonadia	o__Saccharimonadales	f__Nanosynbacteraceae	g__Nanosynbacter		Plaque
AB1292_Plaque.98	AB1292_Plaque.18	999872	Schmartz_2024	known	AB1292_Plaque	92.07	0.17	Neural Network (Specific Model)	11	894	41371	3321516936671576	755679	51	679	28	188217	None	near	HQ	d__Bacteria	p__Patescibacteria	c__Saccharimonadia	o__Saccharimonadales	f__Nanoperiomorbaceae	g__Nanoperiomorbus		Plaque
AB1292_Saliva.19	GCF_018128245.1	9748	GTDB	known	AB1292_Saliva	78.03	1.75	Neural Network (Specific Model)	11	861	4981	2.61673e+16	1944840	3	2136	474	44064	None	substantial	MQ	d__Bacteria	p__Fusobacteriota	c__Fusobacteriia	o__Fusobacteriales	f__Leptotrichiaceae	g__JABCPH02	JABCPH02 sp013333235	Saliva
AB1292_Saliva.32	GCA_010604095.1	981	GTDB	known	AB1292_Saliva	64.97	1.19	Neural Network (Specific Model)	11	88	58103	3.05939e+16	1192613	4	1145	51	132177	None	moderate	MQ	d__Bacteria	p__Bacillota	c__Bacilli	o__Lactobacillales	f__Streptococcaceae	g__Streptococcus	Streptococcus sp000187445	Saliva
AB1292_Saliva.34	AB1117_Saliva.12	993834	Schmartz_2024	known	AB1292_Saliva	99.94	0.17	Neural Network (Specific Model)	11	875	45629	3384648033126294	2238340	6	1932	78	212033	None	near	HQ	d__Bacteria	p__Actinomycetota	c__Actinomycetes	o__Actinomycetales	f__Bifidobacteriaceae	g__Bifidobacterium	Bifidobacterium longum	Saliva
AB1292_Saliva.35	AB1292_Throat.28	998814	Schmartz_2024	known	AB1292_Saliva	93.06	0.64	Gradient Boost (General Model)	11	921	18286	3015827001753361	1677087	37	1711	146	105040	None	near	HQ	d__Bacteria	p__Bacillota_I	c__Bacilli_A	o__Erysipelotrichales	f__Erysipelotrichaceae	g__Bulleidia	Bulleidia sp900554555	Saliva
AB1292_Saliva.42	AB1292_Throat.15	995978	Schmartz_2024	known	AB1292_Saliva	98.75	2.42	Neural Network (Specific Model)	11	899	16896	3.06532e+16	2101442	58	2059	179	62603	None	near	HQ	d__Bacteria	p__Bacillota_C	c__Negativicutes	o__Selenomonadales	f__Selenomonadaceae	g__Centipeda	Centipeda sp015265235	Saliva
AB1292_Saliva.7	GCA_015257795.3	9701	GTDB	known	AB1292_Saliva	54.77	0.95	Neural Network (Specific Model)	11	901	2853	2.46023e+16	326143	36	399	117	8304	None	moderate	MQ	d__Bacteria	p__Patescibacteria	c__Saccharimonadia	o__Saccharimonadales	f__Nanogingivalaceae	g__Nanogingivalis	Nanogingivalis sp015257795	Saliva
AB1294_Plaque.36	AB1294_Plaque.14	999997	Schmartz_2024	known	AB1294_Plaque	99.01	0.14	Neural Network (Specific Model)	11	832	27064	2935183509301156	2100705	47	1989	110	122280	None	near	HQ	d__Bacteria	p__Campylobacterota	c__Campylobacteria	o__Campylobacterales	f__Campylobacteraceae	g__Campylobacter_B		Plaque
AB1294_Plaque.5	AB1759_Throat.2	953467	Schmartz_2024	known	AB1294_Plaque	91.97	0.35	Neural Network (Specific Model)	11	911	609272	3058915525114155	880937	48	876	2	609272	None	near	HQ	d__Bacteria	p__Patescibacteria	c__Saccharimonadia	o__Saccharimonadales	f__Saccharimonadaceae	g__Saccharimonas	Saccharimonas sp905372855	Plaque
AB1294_Plaque.55	GCF_900607225.1	9913	GTDB	known	AB1294_Plaque	68.45	4.83	Neural Network (Specific Model)	11	903	4218	2722623178348369	2598929	67	2882	694	29368	None	moderate	MQ	d__Bacteria	p__Actinomycetota	c__Actinomycetes	o__Propionibacteriales	f__Propionibacteriaceae	g__Arachnia	Arachnia massiliensis	Plaque
AB1294_Plaque.61	GCA_011612585.1	956	GTDB	known	AB1294_Plaque	78.19	2.83	Neural Network (Specific Model)	11	89	26547	2.97832e+16	1508621	43	1505	86	126755	None	substantial	MQ	d__Bacteria	p__Bacillota	c__Bacilli	o__Lactobacillales	f__Streptococcaceae	g__Streptococcus	Streptococcus cristatus_H	Plaque
AB1294_Plaque.62	GCF_000185385.1	9807	GTDB	known	AB1294_Plaque	59.54	0.14	Gradient Boost (General Model)	11	913	3144	2510654761904762	1520810	37	1848	514	15155	None	moderate	MQ	d__Bacteria	p__Bacillota_A	c__Clostridia	o__Lachnospirales	f__Lachnospiraceae	g__Lachnoanaerobaculum	Lachnoanaerobaculum saburreum	Plaque
AB1294_Saliva.15	AB1176_Eye.11	985785	Schmartz_2024	known	AB1294_Saliva	50.86	1	Neural Network (Specific Model)	11	866	3888	2.84988e+16	1372081	42	1393	383	22148	None	moderate	MQ	d__Bacteria	p__Bacteroidota	c__Bacteroidia	o__Bacteroidales	f__Bacteroidaceae	g__Prevotella	Prevotella histicola	Saliva
AB1294_Saliva.47	AB1294_Saliva.1	999737	Schmartz_2024	known	AB1294_Saliva	66.74	1.55	Neural Network (Specific Model)	11	913	3788	2686472491909385	1361483	59	1545	384	19798	None	moderate	MQ	d__Bacteria	p__Bacillota_C	c__Negativicutes	o__Selenomonadales	f__Selenomonadaceae	g__Centipeda	Centipeda sp015265235	Saliva
AB1294_Saliva.51	AB1294_Saliva.10	999993	Schmartz_2024	known	AB1294_Saliva	98.89	0.45	Neural Network (Specific Model)	11	893	33860	3188769017980636	773095	41	723	31	119650	None	near	HQ	d__Bacteria	p__Patescibacteria	c__Saccharimonadia	o__Saccharimonadales	f__Nanosyncoccaceae	g__Nanosyncoccus		Saliva
AB1294_Saliva.52	GCF_000220255.1	9868	GTDB	known	AB1294_Saliva	59.06	4.9	Neural Network (Specific Model)	11	846	3639	2.80826e+16	1659766	38	1670	507	19061	None	moderate	MQ	d__Bacteria	p__Bacteroidota	c__Bacteroidia	o__Bacteroidales	f__Bacteroidaceae	g__Prevotella	Prevotella pallens	Saliva
AB1294_Saliva.53	GCF_002959915.1	9753	GTDB	known	AB1294_Saliva	52.87	0.32	Neural Network (Specific Model)	11	877	16278	3.07268e+16	1024345	4	976	108	38525	None	moderate	MQ	d__Bacteria	p__Bacillota_C	c__Negativicutes	o__Veillonellales	f__Veillonellaceae	g__Veillonella	Veillonella atypica	Saliva
AB1297_Plaque.12	AB1790_Plaque.9	972295	Schmartz_2024	known	AB1297_Plaque	76.74	1.03	Neural Network (Specific Model)	11	894	13089	2.96211e+16	1790410	32	1804	208	81238	None	substantial	MQ	d__Bacteria	p__Fusobacteriota	c__Fusobacteriia	o__Fusobacteriales	f__Leptotrichiaceae	g__Leptotrichia_A	Leptotrichia_A sp001274535	Plaque
AB1297_Plaque.38	GCF_005886145.1	9756	GTDB	known	AB1297_Plaque	50.61	0.01	Neural Network (Specific Model)	11	854	85847	3062622478386167	1119785	53	1041	17	234398	None	moderate	MQ	d__Bacteria	p__Pseudomonadota	c__Gammaproteobacteria	o__Burkholderiales	f__Neisseriaceae	g__Neisseria	Neisseria oralis	Plaque
AB1297_Plaque.41	CM_periimplantitis__SP_502SPT_T016__bin_1	985668	Pasolli_2019	known	AB1297_Plaque	54.14	0.7	Neural Network (Specific Model)	11	865	5148	2.83424e+16	2208551	71	2251	499	23671	None	moderate	MQ	d__Bacteria	p__Actinomycetota	c__Actinomycetes	o__Actinomycetales	f__Actinomycetaceae	g__Actinomyces	Actinomyces gerencseriae	Plaque
AB1297_Plaque.5	AB1297_Plaque.17	999	Schmartz_2024	known	AB1297_Plaque	60.22	0.03	Gradient Boost (General Model)	11	886	4293	2.62714e+16	1199249	61	1351	316	22485	None	moderate	MQ	d__Bacteria	p__Pseudomonadota	c__Gammaproteobacteria	o__Cardiobacteriales	f__Cardiobacteriaceae	g__Cardiobacterium	Cardiobacterium hominis	Plaque
AB1297_Saliva.22	AB1297_Throat.5	998814	Schmartz_2024	known	AB1297_Saliva	76.53	0.12	Neural Network (Specific Model)	11	86	63975	3145755603759942	1514943	3	1383	53	103209	None	substantial	MQ	d__Bacteria	p__Bacillota	c__Bacilli	o__Staphylococcales	f__Gemellaceae	g__Gemella	Gemella haemolysans_B	Saliva
AB1297_Saliva.3	GCF_938015485.1	9609	GTDB	known	AB1297_Saliva	55.97	0.84	Gradient Boost (General Model)	11	914	3473	2612754491017964	1429514	38	1670	453	15959	None	moderate	MQ	d__Bacteria	p__Bacillota_A	c__Clostridia	o__Lachnospirales	f__Lachnospiraceae	g__Lachnoanaerobaculum	Lachnoanaerobaculum sp938015485	Saliva
AB1297_Saliva.43	AB1297_Saliva.27	999951	Schmartz_2024	known	AB1297_Saliva	61.66	0.24	Gradient Boost (General Model)	11	939	3820	2720218702865762	1148190	4	1326	338	13419	None	moderate	MQ	d__Bacteria	p__Bacillota_A	c__Clostridia	o__Lachnospirales	f__Lachnospiraceae	g__F0428	F0428 sp003043955	Saliva
AB1297_Saliva.62	CM_cf__CF_TNFC022IS_t1M15__bin_9	967538	Pasolli_2019	known	AB1297_Saliva	59.41	0.45	Gradient Boost (General Model)	11	918	122509	311763851044505	1119146	37	1101	18	163937	None	moderate	MQ	d__Bacteria	p__Bacillota_I	c__Bacilli_A	o__Erysipelotrichales	f__Erysipelotrichaceae	g__Bulleidia	Bulleidia sp015256455	Saliva
AB1297_Saliva.64	AB934_Sputum.1	971156	Schmartz_2024	known	AB1297_Saliva	96.45	0.87	Neural Network (Specific Model)	11	912	42262	3394333740831296	1823748	57	1636	69	87284	None	near	HQ	d__Bacteria	p__Actinomycetota	c__Actinomycetes	o__Actinomycetales	f__Actinomycetaceae	g__Pauljensenia	Pauljensenia sp000758755	Saliva
AB1297_Saliva.8	AB1297_Saliva.26	999922	Schmartz_2024	known	AB1297_Saliva	57.06	0.33	Neural Network (Specific Model)	11	911	3750	2.65854e+16	1381723	58	1583	394	15889	None	moderate	MQ	d__Bacteria	p__Actinomycetota	c__Actinomycetes	o__Mycobacteriales	f__Mycobacteriaceae	g__Corynebacterium	Corynebacterium durum	Saliva
AB1298_Plaque.14	AB1751_Plaque.17	982348	Schmartz_2024	known	AB1298_Plaque	79.96	2.56	Neural Network (Specific Model)	11	914	5082	2880095238095238	1386542	42	1470	317	19382	None	substantial	MQ	d__Bacteria	p__Bacillota_A	c__Clostridia	o__Peptostreptococcales	f__Anaerovoracaceae	g__Eubacterium_B	Eubacterium_B infirmum	Plaque
AB1298_Plaque.20	HeQ_2017__SZAXPI029474-42__bin_12	995662	Pasolli_2019	known	AB1298_Plaque	58.8	2.52	Neural Network (Specific Model)	11	885	3212	2373015988372093	1103717	35	1376	367	11963	None	moderate	MQ	d__Bacteria	p__Bacillota_C	c__Negativicutes	o__Veillonellales	f__Dialisteraceae	g__Allisonella	Allisonella pneumosinta	Plaque
AB1298_Plaque.21	AB1176_Throat.6	98938	Schmartz_2024	known	AB1298_Plaque	99.85	0.58	Neural Network (Specific Model)	11	873	94918	3.13062e+16	2436783	64	2271	40	194585	None	near	HQ	d__Bacteria	p__Actinomycetota	c__Coriobacteriia	o__Coriobacteriales	f__Atopobiaceae	g__Olsenella_F	Olsenella_F profusa	Plaque
AB1298_Plaque.65	GCF_031191185.1	9851	GTDB	known	AB1298_Plaque	87.81	0.07	Neural Network (Specific Model)	11	861	55524	3.37064e+16	2171288	43	1851	73	148869	None	substantial	MQ	d__Bacteria	p__Bacteroidota	c__Bacteroidia	o__Bacteroidales	f__Bacteroidaceae	g__Prevotella	Prevotella nigrescens	Plaque
AB1298_Plaque.73	AB1263_Plaque.57	982409	Schmartz_2024	known	AB1298_Plaque	57.86	2.18	Gradient Boost (General Model)	11	919	3774	2.50555e+16	1060550	51	1301	314	13507	None	moderate	MQ	d__Bacteria	p__Bacillota_I	c__Bacilli_A	o__Erysipelotrichales	f__Erysipelotrichaceae	g__Bulleidia		Plaque
AB1298_Saliva.12	AB1056_Throat.16	955247	Schmartz_2024	known	AB1298_Saliva	86.75	1.6	Neural Network (Specific Model)	11	912	6528	2.65454e+16	1691713	4	1943	328	19981	None	substantial	MQ	d__Bacteria	p__Campylobacterota	c__Campylobacteria	o__Campylobacterales	f__Campylobacteraceae	g__Campylobacter_A	Campylobacter_A concisus_A	Saliva
AB1298_Saliva.15	GCF_000173915.1	9738	GTDB	known	AB1298_Saliva	55.48	2.03	Neural Network (Specific Model)	11	835	5999	2773273350471294	1161236	31	1167	240	51178	None	moderate	MQ	d__Bacteria	p__Bacillota	c__Bacilli	o__Staphylococcales	f__Gemellaceae	g__Gemella	Gemella haemolysans	Saliva
AB1298_Saliva.2	AB1131_Throat.5	978142	Schmartz_2024	known	AB1298_Saliva	55.7	0.74	Neural Network (Specific Model)	11	915	63111	3.23029e+16	913385	38	864	34	182871	None	moderate	MQ	d__Bacteria	p__Bacillota_C	c__Negativicutes	o__Veillonellales	f__Veillonellaceae	g__Veillonella	Veillonella atypica	Saliva
AB1298_Saliva.34	AB1298_Saliva.3	999596	Schmartz_2024	known	AB1298_Saliva	84.86	4.85	Gradient Boost (General Model)	11	918	4323	2616101494885917	2168738	38	2542	581	23649	None	substantial	MQ	d__Bacteria	p__Bacillota_A	c__Clostridia	o__Lachnospirales	f__Lachnospiraceae	g__Lachnoanaerobaculum	Lachnoanaerobaculum orale	Saliva
AB1298_Saliva.45	AB1656_Plaque.26	968679	Schmartz_2024	known	AB1298_Saliva	59.01	0.15	Neural Network (Specific Model)	11	895	4509	2820157154673284	1140584	48	1209	284	16480	None	moderate	MQ	d__Bacteria	p__Bacteroidota	c__Bacteroidia	o__Bacteroidales	f__Porphyromonadaceae	g__Porphyromonas	Porphyromonas endodontalis	Saliva
AB1300_Plaque.22	GCF_000023905.1	973	GTDB	known	AB1300_Plaque	91.14	3.7	Neural Network (Specific Model)	11	857	15721	2810543615676359	2331099	3	2373	266	58220	None	near	HQ	d__Bacteria	p__Fusobacteriota	c__Fusobacteriia	o__Fusobacteriales	f__Leptotrichiaceae	g__Leptotrichia	Leptotrichia buccalis	Plaque
AB1300_Plaque.27	AB1300_Plaque.29	99999	Schmartz_2024	known	AB1300_Plaque	55.04	1.03	Neural Network (Specific Model)	11	851	4332	3.00275e+16	1204369	61	1139	311	22249	None	moderate	MQ	d__Bacteria	p__Actinomycetota	c__Actinomycetes	o__Actinomycetales	f__Micrococcaceae	g__Rothia	Rothia sp001808955	Plaque
AB1300_Plaque.32	GCF_000194945.1	9565	GTDB	known	AB1300_Plaque	93.5	0.27	Neural Network (Specific Model)	11	896	85844	3.07919e+16	2261930	43	2199	57	209371	None	near	HQ	d__Bacteria	p__Bacillota	c__Bacilli	o__Lactobacillales	f__Streptococcaceae	g__Streptococcus	Streptococcus sanguinis	Plaque
AB1300_Plaque.5	AB1474_Plaque.1	988841	Schmartz_2024	known	AB1300_Plaque	69.75	4.07	Neural Network (Specific Model)	11	902	3292	2.61149e+16	2446366	67	2823	795	13625	None	moderate	MQ	d__Bacteria	p__Actinomycetota	c__Actinomycetes	o__Propionibacteriales	f__Propionibacteriaceae	g__Arachnia	Arachnia propionica	Plaque
AB1300_Saliva.25	AB1300_Plaque.29	986885	Schmartz_2024	known	AB1300_Saliva	99.4	0.18	Neural Network (Specific Model)	11	829	51304	3486432038834951	2077701	6	1648	70	171286	None	near	HQ	d__Bacteria	p__Actinomycetota	c__Actinomycetes	o__Actinomycetales	f__Micrococcaceae	g__Rothia	Rothia sp001808955	Saliva
AB1302_Plaque.30	AB1302_Plaque.10	999984	Schmartz_2024	known	AB1302_Plaque	65.08	1.99	Neural Network (Specific Model)	11	94	3071	2.68957e+16	1323125	45	1545	445	14470	None	moderate	MQ	d__Bacteria	p__Spirochaetota	c__Spirochaetia	o__Treponematales	f__Treponemataceae	g__Treponema_C	Treponema_C lecithinolyticum	Plaque
AB1302_Plaque.32	LiJ_2014__V1_CD7-0-PN__bin_21	99118	Pasolli_2019	known	AB1302_Plaque	53.02	0.2	Neural Network (Specific Model)	11	897	416158	3392589928057554	1259138	58	1112	8	454825	None	moderate	MQ	d__Bacteria	p__Actinomycetota	c__Actinomycetes	o__Actinomycetales	f__Bifidobacteriaceae	g__Bifidobacterium	Bifidobacterium dentium	Plaque
AB1302_Plaque.40	AB1302_Plaque.59	999989	Schmartz_2024	known	AB1302_Plaque	97.64	0.53	Neural Network (Specific Model)	11	891	62724	3.31512e+16	766585	51	688	23	125112	None	near	HQ	d__Bacteria	p__Patescibacteria	c__Saccharimonadia	o__Saccharimonadales	f__Nanoperiomorbaceae	g__Nanoperiomorbus		Plaque
AB1302_Plaque.63	GCF_000210715.1	9721	GTDB	known	AB1302_Plaque	70.58	2.33	Gradient Boost (General Model)	11	882	3374	2687928893905192	1617429	66	1772	522	12636	None	substantial	MQ	d__Bacteria	p__Synergistota	c__Synergistia	o__Synergistales	f__Aminobacteriaceae	g__Fretibacterium	Fretibacterium fastidiosum	Plaque
AB1302_Plaque.78	AB1302_Plaque.39	999956	Schmartz_2024	known	AB1302_Plaque	56.85	0.37	Neural Network (Specific Model)	11	913	4392	2873035107587769	831790	51	883	214	13695	None	moderate	MQ	d__Bacteria	p__Actinomycetota	c__Coriobacteriia	o__Coriobacteriales	f__Atopobiaceae	g__Lancefieldella	Lancefieldella sp024691995	Plaque
AB1302_Plaque.86	GCF_030272855.1	950	GTDB	known	AB1302_Plaque	64.33	3.53	Neural Network (Specific Model)	11	876	17765	2.82454e+16	1255626	43	1301	112	61542	None	moderate	MQ	d__Bacteria	p__Bacillota	c__Bacilli	o__Lactobacillales	f__Streptococcaceae	g__Streptococcus	Streptococcus sp030272855	Plaque
AB1306_Plaque.41	AB1306_Plaque.4	999905	Schmartz_2024	known	AB1306_Plaque	99.54	0.84	Gradient Boost (General Model)	11	871	13574	3039870073624946	2413743	6	2309	248	42574	None	near	HQ	d__Bacteria	p__Pseudomonadota	c__Gammaproteobacteria	o__Cardiobacteriales	f__Cardiobacteriaceae	g__Cardiobacterium	Cardiobacterium sp938028185	Plaque
AB1306_Plaque.5	GCA_015258485.1	9803	GTDB	known	AB1306_Plaque	75.74	2.65	Neural Network (Specific Model)	11	904	6076	2889594484995945	1181064	43	1233	218	21621	None	substantial	MQ	d__Bacteria	p__Actinomycetota	c__Coriobacteriia	o__Coriobacteriales	f__Atopobiaceae	g__Lancefieldella	Lancefieldella sp015258485	Plaque
AB1306_Saliva.14	AB1064_Saliva.10	983086	Schmartz_2024	known	AB1306_Saliva	52.13	0.05	Neural Network (Specific Model)	11	887	93095	2.87596e+16	355227	44	366	8	115089	None	moderate	MQ	d__Bacteria	p__Patescibacteria	c__Saccharimonadia	o__Saccharimonadales	f__Nanosynbacteraceae	g__Nanosynbacter	Nanosynbacter sp024330325	Saliva
AB1306_Saliva.25	AB1087_Plaque.27	984427	Schmartz_2024	known	AB1306_Saliva	75.48	0.33	Neural Network (Specific Model)	11	887	5273	2.8694e+16	1235562	51	1275	270	21805	None	substantial	MQ	d__Bacteria	p__Actinomycetota	c__Coriobacteriia	o__Coriobacteriales	f__Eggerthellaceae	g__Cryptobacterium	Cryptobacterium curtum	Saliva
AB1306_Saliva.30	GCF_000164675.2	9652	GTDB	known	AB1306_Saliva	62.24	3.43	Neural Network (Specific Model)	11	883	6294	2.77661e+16	1377256	42	1464	276	44337	None	moderate	MQ	d__Bacteria	p__Bacillota	c__Bacilli	o__Lactobacillales	f__Streptococcaceae	g__Streptococcus	Streptococcus parasanguinis	Saliva
AB1306_Saliva.5	AB1779_Throat.18	957653	Schmartz_2024	known	AB1306_Saliva	64.7	4.06	Neural Network (Specific Model)	11	873	4517	2.60823e+16	1401974	4	1566	367	31357	None	moderate	MQ	d__Bacteria	p__Pseudomonadota	c__Gammaproteobacteria	o__Enterobacterales	f__Pasteurellaceae	g__Haemophilus_D	Haemophilus_D parainfluenzae_R	Saliva
AB1312_Saliva.22	GCF_001072385.1	9517	GTDB	known	AB1312_Saliva	66.07	4.52	Neural Network (Specific Model)	11	9	31894	3.05083e+16	1319230	42	1300	74	83314	None	moderate	MQ	d__Bacteria	p__Bacillota	c__Bacilli	o__Lactobacillales	f__Streptococcaceae	g__Streptococcus	Streptococcus sp001072385	Saliva
AB1312_Saliva.50	AB1702_Throat.26	959339	Schmartz_2024	known	AB1312_Saliva	71.68	0	Gradient Boost (General Model)	11	874	46461	3.00169e+16	1348172	4	1311	75	103533	None	substantial	MQ	d__Bacteria	p__Bacillota	c__Bacilli	o__Lactobacillales	f__Aerococcaceae	g__Granulicatella		Saliva
AB1312_Saliva.78	HMP_2012__SRS022536__bin_59	972934	Pasolli_2019	known	AB1312_Saliva	65.1	1.42	Neural Network (Specific Model)	11	933	5917	2604935483870968	517767	49	620	113	12660	None	moderate	MQ	d__Bacteria	p__Patescibacteria	c__Saccharimonadia	o__Saccharimonadales	f__Nanosynbacteraceae	g__Nanosynbacter		Saliva
AB1312_Saliva.81	AB1312_Saliva.38	999986	Schmartz_2024	known	AB1312_Saliva	81.96	0.79	Neural Network (Specific Model)	11	879	4987	2641037882719253	1733948	41	1927	406	21880	None	substantial	MQ	d__Bacteria	p__Pseudomonadota	c__Gammaproteobacteria	o__Pseudomonadales	f__Moraxellaceae	g__Moraxella_A	Moraxella_A sp927911235	Saliva
AB1313_Plaque.17	GCA_003260325.1	9914	GTDB	known	AB1313_Plaque	88.91	0.25	Gradient Boost (General Model)	4	9	10913	2.78453e+16	881817	25	951	131	36200	None	substantial	MQ	d__Bacteria	p__Patescibacteria	c__JAEDAM01	o__BD1-5	f__UBA6164	g__GN02-872	GN02-872 sp003260325	Plaque
AB1313_Plaque.34	GCA_905371725.1	9676	GTDB	known	AB1313_Plaque	54.1	3.8	Neural Network (Specific Model)	11	89	2737	2492199248120301	1338101	32	1596	493	22627	None	moderate	MQ	d__Bacteria	p__Fusobacteriota	c__Fusobacteriia	o__Fusobacteriales	f__Leptotrichiaceae	g__Leptotrichia_A	Leptotrichia_A sp905371725	Plaque
AB1313_Plaque.44	AB1004_Plaque.29	965258	Schmartz_2024	known	AB1313_Plaque	60.99	0.03	Gradient Boost (General Model)	11	904	3276	2660670037926675	1393885	65	1582	463	11029	None	moderate	MQ	d__Bacteria	p__Synergistota	c__Synergistia	o__Synergistales	f__Aminobacteriaceae	g__Fretibacterium	Fretibacterium sp938030725	Plaque
AB1313_Plaque.46	AB1313_Plaque.54	999979	Schmartz_2024	known	AB1313_Plaque	55.42	0.43	Neural Network (Specific Model)	11	903	3526	2532409972299169	1212392	56	1444	357	26880	None	moderate	MQ	d__Bacteria	p__Bacillota_C	c__Negativicutes	o__Selenomonadales	f__Selenomonadaceae	g__CAJPQU01	CAJPQU01 sp905372875	Plaque
AB1313_Plaque.55	GCF_000234095.1	9765	GTDB	known	AB1313_Plaque	63.78	0.93	Neural Network (Specific Model)	11	917	4241	2723624052004334	1641789	57	1846	437	17291	None	moderate	MQ	d__Bacteria	p__Bacillota_C	c__Negativicutes	o__Selenomonadales	f__Selenomonadaceae	g__Centipeda	Centipeda infelix	Plaque
AB1313_Plaque.61	AB1313_Plaque.58	99933	Schmartz_2024	known	AB1313_Plaque	57.87	2.2	Neural Network (Specific Model)	11	883	3945	2586034024455077	1648566	58	1881	456	14915	None	moderate	MQ	d__Bacteria	p__Actinomycetota	c__Actinomycetes	o__Mycobacteriales	f__Mycobacteriaceae	g__Corynebacterium	Corynebacterium matruchotii	Plaque
AB1313_Plaque.70	AB1313_Plaque.25	999987	Schmartz_2024	known	AB1313_Plaque	92.2	0.65	Neural Network (Specific Model)	11	87	24762	321203125	707327	51	640	51	57065	None	near	HQ	d__Bacteria	p__Patescibacteria	c__Saccharimonadia	o__Saccharimonadales	f__Nanoperiomorbaceae	g__Nanoperiomorbus		Plaque
AB1313_Plaque.72	AB1413_Plaque.9	9799	Schmartz_2024	known	AB1313_Plaque	82.24	0.51	Neural Network (Specific Model)	11	842	11270	3.07551e+16	2169869	62	1984	268	42314	None	substantial	MQ	d__Bacteria	p__Actinomycetota	c__Coriobacteriia	o__Coriobacteriales	f__Atopobiaceae	g__Olsenella_F	Olsenella_F sp001189515	Plaque
AB1313_Plaque.78	CM_periimplantitis__SP_305SPI_T016__bin_13	982941	Pasolli_2019	known	AB1313_Plaque	71.39	3.65	Gradient Boost (General Model)	11	888	3651	2522178153446034	1306175	39	1538	396	11896	None	substantial	MQ	d__Bacteria	p__Bacillota_A	c__Clostridia	o__Peptostreptococcales	f__Anaerovoracaceae	g__Hornefia	Hornefia nodata	Plaque
AB1313_Plaque.9	GCF_008805035.1	9903	GTDB	known	AB1313_Plaque	58.05	2.28	Neural Network (Specific Model)	11	809	4024	2262954856361149	1223868	56	1462	346	17434	None	moderate	MQ	d__Bacteria	p__Pseudomonadota	c__Gammaproteobacteria	o__Burkholderiales	f__Neisseriaceae	g__Eikenella	Eikenella exigua	Plaque
AB1313_Plaque.92	AB1313_Plaque.3	999812	Schmartz_2024	known	AB1313_Plaque	56.84	0.35	Gradient Boost (General Model)	11	85	3635	2.57235e+16	1538940	6	1700	466	11466	None	moderate	MQ	d__Bacteria	p__Pseudomonadota	c__Gammaproteobacteria	o__Burkholderiales	f__Rhodocyclaceae	g__Propionivibrio	Propionivibrio sp938040985	Plaque
AB1313_Saliva.14	AB1588_Saliva.2	976471	Schmartz_2024	known	AB1313_Saliva	71.8	1.59	Neural Network (Specific Model)	11	899	9700	3.25627e+16	1742833	66	1606	267	48941	None	substantial	MQ	d__Bacteria	p__Actinomycetota	c__Actinomycetes	o__Actinomycetales	f__Actinomycetaceae	g__Pauljensenia	Pauljensenia sp018375675	Saliva
AB1313_Saliva.3	AB1313_Saliva.50	999536	Schmartz_2024	known	AB1313_Saliva	67.94	1.04	Neural Network (Specific Model)	11	834	4477	2.39363e+16	1593786	57	1853	408	29294	None	moderate	MQ	d__Bacteria	p__Pseudomonadota	c__Gammaproteobacteria	o__Burkholderiales	f__Neisseriaceae	g__Eikenella	Eikenella corrodens	Saliva
AB1313_Saliva.50	AB1301_Throat.16	975731	Schmartz_2024	known	AB1313_Saliva	52.07	0.91	Neural Network (Specific Model)	11	898	4391	2.70498e+16	1033262	33	1145	277	17263	None	moderate	MQ	d__Bacteria	p__Fusobacteriota	c__Fusobacteriia	o__Fusobacteriales	f__Leptotrichiaceae	g__Leptotrichia_A	Leptotrichia_A sp000469505	Saliva
AB1313_Saliva.53	GCF_002952055.1	9827	GTDB	known	AB1313_Saliva	54.37	1.47	Neural Network (Specific Model)	11	892	3529	2646737588652482	1501783	62	1692	465	12771	None	moderate	MQ	d__Bacteria	p__Desulfobacterota	c__Desulfobulbia	o__Desulfobulbales	f__Desulfobulbaceae	g__Desulfobulbus	Desulfobulbus oralis	Saliva
AB1313_Saliva.61	HMP_2012__SRS019071__bin_48	975886	Pasolli_2019	known	AB1313_Saliva	67.4	0.06	Neural Network (Specific Model)	11	888	66383	3135585023400936	1355339	42	1282	28	103520	None	moderate	MQ	d__Bacteria	p__Bacillota	c__Bacilli	o__Lactobacillales	f__Streptococcaceae	g__Streptococcus	Streptococcus rubneri	Saliva
AB1313_Saliva.75	GCF_001078375.1	9819	GTDB	known	AB1313_Saliva	52.36	2.09	Neural Network (Specific Model)	11	901	17214	2932639780018332	1062718	38	1091	119	49083	None	moderate	MQ	d__Bacteria	p__Bacillota_C	c__Negativicutes	o__Veillonellales	f__Veillonellaceae	g__Veillonella	Veillonella tobetsuensis	Saliva
AB1314_Saliva.14	AB1314_Saliva.18	999861	Schmartz_2024	known	AB1314_Saliva	64.93	1.75	Neural Network (Specific Model)	11	905	3447	2587141280353201	2324044	64	2718	722	20942	None	moderate	MQ	d__Bacteria	p__Actinomycetota	c__Actinomycetes	o__Propionibacteriales	f__Propionibacteriaceae	g__Arachnia	Arachnia sp013333945	Saliva
AB1314_Saliva.33	AB1314_Saliva.9	999007	Schmartz_2024	known	AB1314_Saliva	64.18	3.46	Neural Network (Specific Model)	11	881	2814	2655834363411619	2191092	69	2427	805	9422	None	moderate	MQ	d__Bacteria	p__Actinomycetota	c__Actinomycetes	o__Actinomycetales	f__Actinomycetaceae	g__Actinomyces	Actinomyces oris_A	Saliva
AB1314_Saliva.35	GCF_938018165.1	9589	GTDB	known	AB1314_Saliva	77.31	2.28	Neural Network (Specific Model)	11	914	5493	2.79252e+16	1961008	41	2143	422	26066	None	substantial	MQ	d__Bacteria	p__Bacteroidota	c__Bacteroidia	o__Flavobacteriales	f__Flavobacteriaceae	g__Capnocytophaga	Capnocytophaga leadbetteri_A	Saliva
AB1314_Saliva.58	GCA_900551535.1	9678	GTDB	known	AB1314_Saliva	53.51	1.33	Gradient Boost (General Model)	11	85	3832	2.5375e+16	732468	39	819	211	12932	None	moderate	MQ	d__Bacteria	p__Bacillota	c__Bacilli	o__Lactobacillales	f__Aerococcaceae	g__Granulicatella	Granulicatella sp900551535	Saliva
AB1322_Plaque.12	AB1089_Plaque.1	977759	Schmartz_2024	known	AB1322_Plaque	99.18	0.06	Gradient Boost (General Model)	11	904	60489	3.1682e+16	2792183	36	2662	80	152577	None	near	HQ	d__Bacteria	p__Bacillota_A	c__Clostridia	o__Lachnospirales	f__Lachnospiraceae	g__Lachnoanaerobaculum	Lachnoanaerobaculum saburreum	Plaque
AB1322_Plaque.29	AB1745_Plaque.32	98865	Schmartz_2024	known	AB1322_Plaque	100	0.21	Gradient Boost (General Model)	11	856	22757	3667357404500262	2453128	55	1911	145	64024	None	perfect	HQ	d__Bacteria	p__Bacteroidota	c__Bacteroidia	o__Bacteroidales	f__CAJPTX01	g__Bacteroides_D	Bacteroides_D sp013333835	Plaque
AB1322_Plaque.34	AB837_Saliva.24	973414	Schmartz_2024	known	AB1322_Plaque	96.7	1.07	Neural Network (Specific Model)	11	856	41904	2919740566037736	2167729	29	2120	112	144893	None	near	HQ	d__Bacteria	p__Fusobacteriota	c__Fusobacteriia	o__Fusobacteriales	f__Leptotrichiaceae	g__Leptotrichia	Leptotrichia wadei	Plaque
AB1322_Plaque.49	AB1793_Plaque.32	981617	Schmartz_2024	known	AB1322_Plaque	61.7	1.8	Neural Network (Specific Model)	11	912	3799	2884668393782383	1828251	51	1930	529	16859	None	moderate	MQ	d__Bacteria	p__Spirochaetota	c__Spirochaetia	o__Treponematales	f__Treponemataceae	g__Treponema_D	Treponema_D socranskii	Plaque
AB1322_Plaque.51	GCF_000429225.1	9854	GTDB	known	AB1322_Plaque	70.26	1.7	Neural Network (Specific Model)	11	877	4348	3097405590975969	2156478	74	2039	592	20691	None	substantial	MQ	d__Bacteria	p__Actinomycetota	c__Actinomycetes	o__Actinomycetales	f__Actinomycetaceae	g__Actinomyces	Actinomyces dentalis	Plaque
AB1322_Plaque.64	AB1322_Plaque.50	999838	Schmartz_2024	known	AB1322_Plaque	64.19	0.22	Neural Network (Specific Model)	11	839	4269	2.35978e+16	1460214	57	1733	375	23899	None	moderate	MQ	d__Bacteria	p__Pseudomonadota	c__Gammaproteobacteria	o__Burkholderiales	f__Neisseriaceae	g__Eikenella		Plaque
AB1322_Plaque.72	AB1166_Plaque.27	996686	Schmartz_2024	known	AB1322_Plaque	99.12	0.26	Neural Network (Specific Model)	11	857	124844	3.39628e+16	2609484	65	2198	41	214765	None	near	HQ	d__Bacteria	p__Actinomycetota	c__Actinomycetes	o__Actinomycetales	f__Actinomycetaceae	g__Peptidiphaga	Peptidiphaga sp938020505	Plaque
AB1322_Plaque.87	AB1793_Plaque.48	968116	Schmartz_2024	known	AB1322_Plaque	55.81	2.49	Neural Network (Specific Model)	11	884	4162	2985417348608838	1236250	57	1222	327	14780	None	moderate	MQ	d__Bacteria	p__Bacteroidota	c__Bacteroidia	o__Bacteroidales	f__Porphyromonadaceae	g__Porphyromonas	Porphyromonas pasteri	Plaque
AB1322_Saliva.22	GCA_018366675.1	9595	GTDB	known	AB1322_Saliva	83.54	0.23	Neural Network (Specific Model)	11	887	23259	3.02198e+16	1769326	43	1735	151	89226	None	substantial	MQ	d__Bacteria	p__Bacillota	c__Bacilli	o__Lactobacillales	f__Streptococcaceae	g__Streptococcus	Streptococcus parasanguinis_R	Saliva
AB1322_Saliva.24	AB1130_Saliva.3	977589	Schmartz_2024	known	AB1322_Saliva	68.37	1.31	Gradient Boost (General Model)	11	855	3081	2495882753919564	1282926	3	1467	443	17321	None	moderate	MQ	d__Bacteria	p__Fusobacteriota	c__Fusobacteriia	o__Fusobacteriales	f__Leptotrichiaceae	g__Leptotrichia	Leptotrichia wadei_A	Saliva
AB1322_Saliva.34	AB1322_Saliva.8	998459	Schmartz_2024	known	AB1322_Saliva	58.09	1.54	Gradient Boost (General Model)	11	872	3481	2635970924195223	1742283	43	1926	556	11150	None	moderate	MQ	d__Bacteria	p__Bacillota_A	c__Clostridia	o__Lachnospirales	f__Lachnospiraceae	g__Oribacterium	Oribacterium sinus	Saliva
AB1322_Saliva.7	AB1322_Saliva.18	999711	Schmartz_2024	known	AB1322_Saliva	52.53	1.38	Gradient Boost (General Model)	11	875	2888	2607574083375188	1775389	66	1991	643	19005	None	moderate	MQ	d__Bacteria	p__Pseudomonadota	c__Gammaproteobacteria	o__Burkholderiales	f__Burkholderiaceae	g__Lautropia	Lautropia mirabilis	Saliva
AB1322_Saliva.8	AB1060_Forehead.2	961921	Schmartz_2024	known	AB1322_Saliva	94.1	0.43	Neural Network (Specific Model)	11	876	17798	3056794871794872	1957069	39	1872	169	62990	None	near	HQ	d__Bacteria	p__Bacillota_C	c__Negativicutes	o__Veillonellales	f__Veillonellaceae	g__Veillonella	Veillonella nakazawae	Saliva
AB1335_Plaque.19	GCF_000174815.1	9631	GTDB	known	AB1335_Plaque	54.61	0.48	Neural Network (Specific Model)	11	911	3831	2.9118e+16	878737	49	918	249	13492	None	moderate	MQ	d__Bacteria	p__Bacteroidota	c__Bacteroidia	o__Bacteroidales	f__Porphyromonadaceae	g__Porphyromonas	Porphyromonas endodontalis	Plaque
AB1335_Plaque.22	AB1335_Plaque.40	100	Schmartz_2024	known	AB1335_Plaque	97.06	0.68	Neural Network (Specific Model)	11	896	63231	3345630372492837	780511	51	698	15	155201	None	near	HQ	d__Bacteria	p__Patescibacteria	c__Saccharimonadia	o__Saccharimonadales	f__Nanoperiomorbaceae	g__Nanoperiomorbus		Plaque
AB1335_Plaque.53	GCF_001553855.1	9579	GTDB	known	AB1335_Plaque	53.35	3.41	Neural Network (Specific Model)	11	892	4398	2.4561e+16	1432189	4	1739	369	33320	None	moderate	MQ	d__Bacteria	p__Bacillota	c__Bacilli	o__Lactobacillales	f__Streptococcaceae	g__Streptococcus	Streptococcus gordonii	Plaque
AB1335_Plaque.57	AB1357_Throat.19	953711	Schmartz_2024	known	AB1335_Plaque	89.06	0.8	Neural Network (Specific Model)	11	905	67456	3013450363196126	823500	48	826	28	122124	None	substantial	MQ	d__Bacteria	p__Patescibacteria	c__Saccharimonadia	o__Saccharimonadales	f__Saccharimonadaceae	g__Saccharimonas		Plaque
AB1335_Plaque.62	GCF_000160555.1	9834	GTDB	known	AB1335_Plaque	52.9	3.56	Neural Network (Specific Model)	11	917	3969	2.59626e+16	1302518	58	1538	370	17044	None	moderate	MQ	d__Bacteria	p__Bacillota_C	c__Negativicutes	o__Selenomonadales	f__Selenomonadaceae	g__Centipeda	Centipeda noxia	Plaque
AB1335_Plaque.65	AB1727_Plaque.32	994451	Schmartz_2024	known	AB1335_Plaque	99.48	0.1	Gradient Boost (General Model)	11	893	50629	3399542755344418	1921727	39	1684	60	140895	None	near	HQ	d__Bacteria	p__Bacillota_A	c__Clostridia	o__Lachnospirales	f__Lachnospiraceae	g__Johnsonella	Johnsonella sp937927235	Plaque
AB1335_Plaque.71	GCF_000413475.1	9739	GTDB	known	AB1335_Plaque	53.61	2.36	Neural Network (Specific Model)	11	872	18445	2.76107e+16	1343322	36	1417	133	70582	None	moderate	MQ	d__Bacteria	p__Bacillota	c__Bacilli	o__Lactobacillales	f__Streptococcaceae	g__Streptococcus	Streptococcus intermedius	Plaque
AB1335_Plaque.74	GCF_938018165.1	9564	GTDB	known	AB1335_Plaque	60.02	2.39	Neural Network (Specific Model)	11	916	5128	2.73978e+16	1608918	41	1797	377	20257	None	moderate	MQ	d__Bacteria	p__Bacteroidota	c__Bacteroidia	o__Flavobacteriales	f__Flavobacteriaceae	g__Capnocytophaga	Capnocytophaga leadbetteri_A	Plaque
AB1335_Plaque.76	AB1335_Plaque.41	999865	Schmartz_2024	known	AB1335_Plaque	57	1.54	Neural Network (Specific Model)	11	842	3116	2.4166e+16	1178324	57	1370	400	10215	None	moderate	MQ	d__Bacteria	p__Pseudomonadota	c__Gammaproteobacteria	o__Burkholderiales	f__Neisseriaceae	g__Eikenella	Eikenella corrodens	Plaque
AB1335_Plaque.86	GCF_000210715.1	9762	GTDB	known	AB1335_Plaque	86.6	1.09	Gradient Boost (General Model)	11	881	4684	2828326261197548	2039992	65	2121	517	17318	None	substantial	MQ	d__Bacteria	p__Synergistota	c__Synergistia	o__Synergistales	f__Aminobacteriaceae	g__Fretibacterium	Fretibacterium fastidiosum	Plaque
AB1335_Saliva.16	AB1587_Throat.1	971975	Schmartz_2024	known	AB1335_Saliva	94.49	0.76	Gradient Boost (General Model)	11	919	50465	3182959309494451	1682230	37	1622	60	153528	None	near	HQ	d__Bacteria	p__Bacillota_I	c__Bacilli_A	o__Erysipelotrichales	f__Erysipelotrichaceae	g__Bulleidia	Bulleidia sp927911475	Saliva
AB1335_Saliva.52	AB1356_Throat.17	957432	Schmartz_2024	known	AB1335_Saliva	89.08	0.43	Neural Network (Specific Model)	11	89	19965	2970948093220339	1888258	39	1888	157	76759	None	substantial	MQ	d__Bacteria	p__Pseudomonadota	c__Gammaproteobacteria	o__Enterobacterales	f__Pasteurellaceae	g__Haemophilus_D	Haemophilus_D sp014931275	Saliva
AB1335_Saliva.71	GCA_001058355.1	9567	GTDB	known	AB1335_Saliva	50.83	0.37	Gradient Boost (General Model)	11	847	8267	2692296875	609700	4	640	106	30420	None	moderate	MQ	d__Bacteria	p__Bacillota	c__Bacilli	o__Lactobacillales	f__Aerococcaceae	g__Granulicatella	Granulicatella sp001058355	Saliva
AB1348_Plaque.11	AB1305_Saliva.5	975407	Schmartz_2024	known	AB1348_Plaque	77.89	3.08	Neural Network (Specific Model)	11	875	6042	284470648815654	1889561	67	1942	395	32679	None	substantial	MQ	d__Bacteria	p__Actinomycetota	c__Actinomycetes	o__Actinomycetales	f__Actinomycetaceae	g__Pauljensenia	Pauljensenia sp000185285	Plaque
AB1348_Plaque.28	AB1348_Plaque.14	999993	Schmartz_2024	known	AB1348_Plaque	100	0.04	Gradient Boost (General Model)	11	879	29495	3061146853146853	2238206	6	2145	120	128985	None	perfect	HQ	d__Bacteria	p__Pseudomonadota	c__Gammaproteobacteria	o__Cardiobacteriales	f__Cardiobacteriaceae	g__Cardiobacterium		Plaque
AB1348_Plaque.31	GCF_000429245.1	9772	GTDB	known	AB1348_Plaque	56.7	2.92	Neural Network (Specific Model)	11	883	2980	2.64492e+16	1692872	71	1888	583	9678	None	moderate	MQ	d__Bacteria	p__Actinomycetota	c__Actinomycetes	o__Actinomycetales	f__Actinomycetaceae	g__Pauljensenia	Pauljensenia georgiae	Plaque
AB1348_Saliva.11	AB1470_Forehead.2	979655	Schmartz_2024	known	AB1348_Saliva	98.45	0.07	Neural Network (Specific Model)	11	878	37807	3430	2241755	64	1915	98	133464	None	near	HQ	d__Bacteria	p__Actinomycetota	c__Actinomycetes	o__Actinomycetales	f__Actinomycetaceae	g__Pauljensenia	Pauljensenia bouchesdurhonensis	Saliva
AB1348_Saliva.14	AB1348_Saliva.18	999342	Schmartz_2024	known	AB1348_Saliva	74.41	2.22	Gradient Boost (General Model)	11	896	4974	2610068879148403	1392853	37	1597	332	20014	None	substantial	MQ	d__Bacteria	p__Bacillota_I	c__Bacilli_A	o__Erysipelotrichales	f__Erysipelotrichaceae	g__Bulleidia	Bulleidia sp900554555	Saliva
AB1348_Saliva.31	AB1000_Saliva.24	970628	Schmartz_2024	known	AB1348_Saliva	83.09	0.74	Neural Network (Specific Model)	11	901	11205	3.07644e+16	1773887	59	1736	216	63123	None	substantial	MQ	d__Bacteria	p__Bacillota_C	c__Negativicutes	o__Selenomonadales	f__Selenomonadaceae	g__Centipeda	Centipeda sp015265235	Saliva
AB1348_Saliva.39	AB4181_Throat.3	96394	Schmartz_2024	known	AB1348_Saliva	99.98	0.01	Neural Network (Specific Model)	11	905	96088	313923710208562	1894928	4	1822	37	264067	None	near	HQ	d__Bacteria	p__Pseudomonadota	c__Gammaproteobacteria	o__Enterobacterales	f__Pasteurellaceae	g__Haemophilus_D	Haemophilus_D parainfluenzae_T	Saliva
AB1351_Plaque.14	GCF_031191205.1	9546	GTDB	known	AB1351_Plaque	62.71	0.4	Neural Network (Specific Model)	11	908	3722	2.53092e+16	1274464	39	1527	368	15921	None	moderate	MQ	d__Bacteria	p__Pseudomonadota	c__Gammaproteobacteria	o__Enterobacterales	f__Pasteurellaceae	g__Haemophilus_D	Haemophilus_D parainfluenzae	Plaque
AB1351_Plaque.18	SPMP94_bin.81	980342	SPMP	known	AB1351_Plaque	80.72	0.09	Neural Network (Specific Model)	11	893	43954	2.97157e+16	1544156	32	1549	75	175418	None	substantial	MQ	d__Bacteria	p__Bacillota	c__Bacilli	o__Lactobacillales	f__Lactobacillaceae	g__Ligilactobacillus	Ligilactobacillus salivarius	Plaque
AB1351_Plaque.23	AB1351_Plaque.4	999876	Schmartz_2024	known	AB1351_Plaque	62.42	0.59	Neural Network (Specific Model)	11	918	4797	2746329411764706	1523207	41	1700	367	15856	None	moderate	MQ	d__Bacteria	p__Bacteroidota	c__Bacteroidia	o__Flavobacteriales	f__Flavobacteriaceae	g__Capnocytophaga	Capnocytophaga leadbetteri	Plaque
AB1351_Plaque.31	MGYG000000277	992158	UHGG	known	AB1351_Plaque	57.81	0.04	Neural Network (Specific Model)	11	871	57240	2.97644e+16	1019214	37	996	38	108433	None	moderate	MQ	d__Bacteria	p__Bacillota	c__Bacilli	o__Lactobacillales	f__Streptococcaceae	g__Streptococcus	Streptococcus mutans	Plaque
AB1351_Plaque.35	BackhedF_2015__SID137_4M__bin_9	997738	Pasolli_2019	known	AB1351_Plaque	79.65	3.54	Neural Network (Specific Model)	11	902	5031	2.60571e+16	1485011	35	1715	352	38717	None	substantial	MQ	d__Bacteria	p__Bacillota	c__Bacilli	o__Lactobacillales	f__Lactobacillaceae	g__Lactobacillus	Lactobacillus paragasseri	Plaque
AB1351_Plaque.45	GCF_900459175.1	9841	GTDB	known	AB1351_Plaque	51.34	0.35	Neural Network (Specific Model)	11	824	72248	2.97145e+16	1143819	44	1059	19	124447	None	moderate	MQ	d__Bacteria	p__Bacillota	c__Bacilli	o__Lactobacillales	f__Streptococcaceae	g__Streptococcus	Streptococcus downei	Plaque
AB1351_Saliva.13	AB1351_Saliva.2	998609	Schmartz_2024	known	AB1351_Saliva	63.93	2.69	Neural Network (Specific Model)	11	879	2619	2625216769890424	1878709	69	2099	720	20458	None	moderate	MQ	d__Bacteria	p__Actinomycetota	c__Actinomycetes	o__Actinomycetales	f__Actinomycetaceae	g__Actinomyces	Actinomyces sp915069725	Saliva
AB1351_Saliva.15	GCA_937976325.1	9542	GTDB	known	AB1351_Saliva	73.31	2.39	Neural Network (Specific Model)	11	88	6842	2727821997105644	1282445	39	1382	247	27627	None	substantial	MQ	d__Bacteria	p__Bacillota	c__Bacilli	o__Lactobacillales	f__Aerococcaceae	g__Granulicatella	Granulicatella sp937976325	Saliva
AB1351_Saliva.2	AB1351_Throat.3	992423	Schmartz_2024	known	AB1351_Saliva	63.03	0.19	Neural Network (Specific Model)	11	867	47916	310503909643788	1235378	4	1151	46	105069	None	moderate	MQ	d__Bacteria	p__Bacillota_C	c__Negativicutes	o__Veillonellales	f__Veillonellaceae	g__Veillonella	Veillonella atypica	Saliva
AB1351_Saliva.5	GCF_002094975.1	956	GTDB	known	AB1351_Saliva	51.54	4.86	Neural Network (Specific Model)	11	873	7087	276806684733514	1051505	4	1107	182	86155	None	moderate	MQ	d__Bacteria	p__Bacillota	c__Bacilli	o__Lactobacillales	f__Streptococcaceae	g__Streptococcus	Streptococcus salivarius_D	Saliva
AB1352_Plaque.12	GCF_000269805.1	9889	GTDB	known	AB1352_Plaque	61.88	1.71	Neural Network (Specific Model)	11	876	5001	3.0799e+16	2047066	68	1945	473	26230	None	moderate	MQ	d__Bacteria	p__Actinomycetota	c__Actinomycetes	o__Actinomycetales	f__Actinomycetaceae	g__Actinomyces	Actinomyces massiliensis	Plaque
AB1352_Plaque.27	HMP_2012__SRS023538__bin_8	978889	Pasolli_2019	known	AB1352_Plaque	81.1	0.25	Neural Network (Specific Model)	11	877	11022	3.07561e+16	1888653	41	1797	238	50561	None	substantial	MQ	d__Bacteria	p__Bacteroidota	c__Bacteroidia	o__Flavobacteriales	f__Flavobacteriaceae	g__Capnocytophaga	Capnocytophaga gingivalis	Plaque
AB1352_Plaque.37	MGYG000003878	991783	UHGG	known	AB1352_Plaque	91.02	0.03	Neural Network (Specific Model)	11	869	18875	3.35111e+16	2573130	44	2227	216	78578	None	near	HQ	d__Bacteria	p__Bacteroidota	c__Bacteroidia	o__Bacteroidales	f__Bacteroidaceae	g__Prevotella	Prevotella oris	Plaque
AB1352_Plaque.57	GCF_900637555.1	956	GTDB	known	AB1352_Plaque	64.1	2.55	Gradient Boost (General Model)	11	86	4192	2791034637876743	2159020	66	2223	587	26816	None	moderate	MQ	d__Bacteria	p__Pseudomonadota	c__Gammaproteobacteria	o__Burkholderiales	f__Burkholderiaceae	g__Lautropia	Lautropia mirabilis	Plaque
AB1352_Plaque.61	AB1352_Plaque.30	999928	Schmartz_2024	known	AB1352_Plaque	60.73	2.11	Neural Network (Specific Model)	11	837	3978	2.49783e+16	1259517	57	1408	352	21935	None	moderate	MQ	d__Bacteria	p__Pseudomonadota	c__Gammaproteobacteria	o__Burkholderiales	f__Neisseriaceae	g__Eikenella		Plaque
[truncated: 3,744 more rows]

## Sheet: SupplementaryTable9
Element symbol	Element name	Type	Subtype	Class	Subclass	Protein id	Contig id	Start	Stop	Strand	Method	lineage	sample_id	specimen	oral_status	Periodontitis	Caries
[truncated: 46 more rows]

[truncated: 1 more sheets: SupplementaryTable10]
